# Supplementary material for: Single-Cell Analyses Offer Insights into the Different Remodeling Programs of Arteries and Veins
Source: Cells. 2024 May 7;13(10):793. doi: 10.3390/cells13100793 (PMC11119253; doi:10.3390/cells13100793)
Supplement: Supplementary file 1 [file cells-13-00793-s001.zip]

Archive with 11 entries (11 files):
- Data Sets S1-S8 Cells.xlsx
- Figure S1.PNG
- Figure S2.PNG
- Figure S3.PNG
- Figure S4.PNG
- Figure S5.PNG
- Figure S6.PNG
- Figure S7.PNG
- Figure S8.PNG
- Supplementary Methods Cells.pdf
- Table S1.png
