# Supplementary material for: Single-Cell Analyses Offer Insights into the Different Remodeling Programs of Arteries and Veins
Source: Cells. 2024 May 7;13(10):793. doi: 10.3390/cells13100793 (PMC11119253; doi:10.3390/cells13100793)
Supplement: Supplementary file 1 [file cells-13-00793-s001.zip › Data Sets S1-S8 Cells.xlsx]

## Sheet: Data Set S1 (All Markers)
	p_val	avg_log2FC	pct.1	pct.2	p_val_adj	cluster	gene
MYH11	0	3.49368	0.995	0.41	0	Contractile SMC	MYH11
TPM2	0	3.31463	0.999	0.789	0	Contractile SMC	TPM2
ACTA2	0	3.22076	0.996	0.667	0	Contractile SMC	ACTA2
MCAM	0	3.15477	0.987	0.274	0	Contractile SMC	MCAM
TAGLN	0	3.14519	0.999	0.865	0	Contractile SMC	TAGLN
MUSTN1	0	3.06714	0.95	0.353	0	Contractile SMC	MUSTN1
MYL9	0	2.88371	0.996	0.79	0	Contractile SMC	MYL9
CNN1	0	2.87906	0.956	0.273	0	Contractile SMC	CNN1
PPP1R14A	0	2.84293	0.978	0.362	0	Contractile SMC	PPP1R14A
CSRP1	0	2.77552	0.977	0.578	0	Contractile SMC	CSRP1
ADIRF	0	2.75155	0.994	0.743	0	Contractile SMC	ADIRF
FLNA	0	2.7166	0.994	0.841	0	Contractile SMC	FLNA
PLN	0	2.70674	0.954	0.239	0	Contractile SMC	PLN
RGS5	0	2.69305	0.907	0.299	0	Contractile SMC	RGS5
DSTN	0	2.68688	0.998	0.896	0	Contractile SMC	DSTN
SORBS2	0	2.68353	0.955	0.242	0	Contractile SMC	SORBS2
ACTG2	0	2.65458	0.929	0.329	0	Contractile SMC	ACTG2
SYNPO2	0	2.61757	0.955	0.487	0	Contractile SMC	SYNPO2
LMOD1	0	2.53605	0.971	0.42	0	Contractile SMC	LMOD1
LPP	0	2.52772	0.99	0.768	0	Contractile SMC	LPP
TGM2	0	2.51486	0.857	0.352	0	Contractile SMC	TGM2
TPM1	0	2.40716	0.995	0.8	0	Contractile SMC	TPM1
DES	0	2.36846	0.81	0.295	0	Contractile SMC	DES
C11orf96	0	2.14678	0.996	0.787	0	Contractile SMC	C11orf96
TNS1	0	2.07958	0.969	0.584	0	Contractile SMC	TNS1
CALD1	0	2.05099	0.997	0.818	0	Contractile SMC	CALD1
CARMN	0	2.04197	0.826	0.167	0	Contractile SMC	CARMN
MYLK	0	2.01677	0.959	0.349	0	Contractile SMC	MYLK
CCN3	0	2.01666	0.823	0.279	0	Contractile SMC	CCN3
FHL5	0	1.99438	0.883	0.137	0	Contractile SMC	FHL5
SMTN	0	1.92596	0.908	0.317	0	Contractile SMC	SMTN
NEXN	0	1.92492	0.94	0.535	0	Contractile SMC	NEXN
CSRP2	0	1.92242	0.877	0.376	0	Contractile SMC	CSRP2
RERGL	0	1.89988	0.552	0.06	0	Contractile SMC	RERGL
FBXO32	0	1.89557	0.914	0.328	0	Contractile SMC	FBXO32
C12orf75	0	1.89403	0.857	0.286	0	Contractile SMC	C12orf75
PPP1R12B	0	1.89376	0.933	0.319	0	Contractile SMC	PPP1R12B
SORBS1	0	1.8678	0.901	0.309	0	Contractile SMC	SORBS1
FHL1	0	1.8512	0.95	0.594	0	Contractile SMC	FHL1
ACTC1	0	1.84046	0.545	0.099	0	Contractile SMC	ACTC1
ACTN4	0	1.82008	0.951	0.656	0	Contractile SMC	ACTN4
SYNM	0	1.77346	0.858	0.195	0	Contractile SMC	SYNM
RAMP1	0	1.77081	0.846	0.178	0	Contractile SMC	RAMP1
ACTN1	0	1.70958	0.969	0.634	0	Contractile SMC	ACTN1
CAVIN3	0	1.68571	0.926	0.604	0	Contractile SMC	CAVIN3
ITGA8	0	1.67037	0.895	0.173	0	Contractile SMC	ITGA8
PALLD	0	1.66389	0.951	0.642	0	Contractile SMC	PALLD
MYL6	0	1.65857	0.994	0.974	0	Contractile SMC	MYL6
KCNAB1	0	1.62643	0.841	0.097	0	Contractile SMC	KCNAB1
NOTCH3	0	1.61812	0.9	0.246	0	Contractile SMC	NOTCH3
SLMAP	0	1.61471	0.901	0.377	0	Contractile SMC	SLMAP
VCL	0	1.60035	0.931	0.554	0	Contractile SMC	VCL
CKB	0	1.58403	0.841	0.412	0	Contractile SMC	CKB
PRUNE2	0	1.58035	0.824	0.216	0	Contractile SMC	PRUNE2
CRIP1	0	1.53514	0.906	0.751	0	Contractile SMC	CRIP1
MSRB3	0	1.5046	0.912	0.446	0	Contractile SMC	MSRB3
SVIL	0	1.49806	0.92	0.458	0	Contractile SMC	SVIL
SNCG	0	1.48984	0.725	0.324	0	Contractile SMC	SNCG
BCAM	0	1.48706	0.752	0.179	0	Contractile SMC	BCAM
ACTB	0	1.46025	1	0.991	0	Contractile SMC	ACTB
TNC	0	1.45175	0.743	0.313	0	Contractile SMC	TNC
RBPMS	0	1.45001	0.92	0.487	0	Contractile SMC	RBPMS
COL18A1	0	1.43805	0.937	0.518	0	Contractile SMC	COL18A1
RASSF3	0	1.41947	0.774	0.253	0	Contractile SMC	RASSF3
MAP1B	0	1.40644	0.963	0.634	0	Contractile SMC	MAP1B
NDUFA4	0	1.39918	0.951	0.866	0	Contractile SMC	NDUFA4
ID4	0	1.39559	0.836	0.427	0	Contractile SMC	ID4
PPP1R12A	0	1.38827	0.943	0.714	0	Contractile SMC	PPP1R12A
WTIP	0	1.38459	0.787	0.267	0	Contractile SMC	WTIP
TLN1	0	1.38263	0.963	0.853	0	Contractile SMC	TLN1
MTRNR2L1	0	1.38067	0.395	0.151	0	Contractile SMC	MTRNR2L1
GADD45G	0	1.36574	0.672	0.328	0	Contractile SMC	GADD45G
SPEG	0	1.35394	0.814	0.099	0	Contractile SMC	SPEG
FRZB	0	1.34928	0.69	0.177	0	Contractile SMC	FRZB
TINAGL1	0	1.34685	0.859	0.246	0	Contractile SMC	TINAGL1
PDLIM7	0	1.34289	0.857	0.425	0	Contractile SMC	PDLIM7
A2M	0	1.33226	0.959	0.597	0	Contractile SMC	A2M
MRVI1	0	1.32138	0.833	0.182	0	Contractile SMC	MRVI1
AOC3	0	1.31035	0.832	0.184	0	Contractile SMC	AOC3
RASL12	0	1.30889	0.786	0.162	0	Contractile SMC	RASL12
CD151	0	1.30755	0.926	0.732	0	Contractile SMC	CD151
SPARCL1	0	1.30706	0.983	0.759	0	Contractile SMC	SPARCL1
DMD	0	1.30358	0.818	0.267	0	Contractile SMC	DMD
PRKG1	0	1.30245	0.868	0.338	0	Contractile SMC	PRKG1
MYH10	0	1.29781	0.81	0.416	0	Contractile SMC	MYH10
RCAN2	0	1.29249	0.816	0.22	0	Contractile SMC	RCAN2
TTLL7	0	1.28208	0.827	0.214	0	Contractile SMC	TTLL7
RRAS	0	1.26161	0.897	0.655	0	Contractile SMC	RRAS
FBLIM1	0	1.25934	0.843	0.305	0	Contractile SMC	FBLIM1
CRIP2	0	1.24873	0.843	0.472	0	Contractile SMC	CRIP2
SELENOM	0	1.24661	0.954	0.747	0	Contractile SMC	SELENOM
ILK	0	1.23686	0.859	0.568	0	Contractile SMC	ILK
CASQ2	0	1.23193	0.753	0.079	0	Contractile SMC	CASQ2
SUSD5	0	1.21491	0.773	0.131	0	Contractile SMC	SUSD5
EFHD1	0	1.20704	0.773	0.164	0	Contractile SMC	EFHD1
ITGA7	0	1.20243	0.778	0.167	0	Contractile SMC	ITGA7
CRYAB	0	1.20035	0.95	0.681	0	Contractile SMC	CRYAB
HES4	0	1.20005	0.775	0.276	0	Contractile SMC	HES4
EPAS1	0	1.18327	0.925	0.619	0	Contractile SMC	EPAS1
RHOB	0	1.1744	0.968	0.789	0	Contractile SMC	RHOB
CRIM1	0	1.17409	0.788	0.327	0	Contractile SMC	CRIM1
MFGE8	0	1.17135	0.967	0.693	0	Contractile SMC	MFGE8
CPE	0	1.15988	0.939	0.52	0	Contractile SMC	CPE
IER2	0	1.15974	0.953	0.862	0	Contractile SMC	IER2
SELENOW	0	1.156	0.926	0.796	0	Contractile SMC	SELENOW
CLIC4	0	1.14636	0.914	0.704	0	Contractile SMC	CLIC4
KCNMB1	0	1.1403	0.755	0.151	0	Contractile SMC	KCNMB1
HSPB7	0	1.13867	0.712	0.136	0	Contractile SMC	HSPB7
SORT1	0	1.13633	0.799	0.242	0	Contractile SMC	SORT1
HSPB1	0	1.11032	0.993	0.934	0	Contractile SMC	HSPB1
FILIP1	0	1.11006	0.806	0.365	0	Contractile SMC	FILIP1
ADARB1	0	1.10913	0.765	0.317	0	Contractile SMC	ADARB1
CCDC107	0	1.10829	0.894	0.624	0	Contractile SMC	CCDC107
IGFBP5	0	1.10438	0.957	0.6	0	Contractile SMC	IGFBP5
RRAD	0	1.09652	0.746	0.377	0	Contractile SMC	RRAD
TSC22D1	0	1.09527	0.92	0.586	0	Contractile SMC	TSC22D1
PLS3	0	1.08782	0.924	0.596	0	Contractile SMC	PLS3
SLC25A4	0	1.08774	0.772	0.316	0	Contractile SMC	SLC25A4
FILIP1L	0	1.07851	0.865	0.644	0	Contractile SMC	FILIP1L
NET1	0	1.07403	0.709	0.309	0	Contractile SMC	NET1
CSPG4	0	1.06485	0.724	0.128	0	Contractile SMC	CSPG4
WDR1	0	1.06234	0.869	0.568	0	Contractile SMC	WDR1
TGFB1I1	0	1.06132	0.83	0.513	0	Contractile SMC	TGFB1I1
MALAT1	0	1.05874	0.999	0.999	0	Contractile SMC	MALAT1
PDLIM5	0	1.05391	0.885	0.575	0	Contractile SMC	PDLIM5
AVPR1A	0	1.05391	0.528	0.1	0	Contractile SMC	AVPR1A
YWHAH	0	1.05098	0.856	0.641	0	Contractile SMC	YWHAH
CCDC3	0	1.04769	0.748	0.238	0	Contractile SMC	CCDC3
NIBAN1	0	1.04094	0.862	0.513	0	Contractile SMC	NIBAN1
CAVIN1	0	1.03896	0.955	0.721	0	Contractile SMC	CAVIN1
GMDS	0	1.03884	0.677	0.243	0	Contractile SMC	GMDS
DBNDD2	0	1.03665	0.815	0.478	0	Contractile SMC	DBNDD2
SH3BGRL	0	1.03109	0.907	0.788	0	Contractile SMC	SH3BGRL
KCNMA1	0	1.02521	0.783	0.245	0	Contractile SMC	KCNMA1
ITGA5	0	1.02465	0.709	0.57	0	Contractile SMC	ITGA5
AMIGO2	0	1.02353	0.658	0.144	0	Contractile SMC	AMIGO2
FOXC1	0	1.01308	0.85	0.427	0	Contractile SMC	FOXC1
PDK3	0	1.01196	0.726	0.274	0	Contractile SMC	PDK3
TOB1	0	1.01113	0.805	0.444	0	Contractile SMC	TOB1
LBH	0	1.00605	0.695	0.305	0	Contractile SMC	LBH
MYOCD	0	0.995567	0.628	0.076	0	Contractile SMC	MYOCD
MBNL1-AS1	0	0.991203	0.629	0.155	0	Contractile SMC	MBNL1-AS1
COL8A1	0	0.982918	0.767	0.307	0	Contractile SMC	COL8A1
PCDH7	0	0.974076	0.651	0.162	0	Contractile SMC	PCDH7
ITGA1	0	0.973895	0.809	0.344	0	Contractile SMC	ITGA1
ITGB1	0	0.965239	0.978	0.917	0	Contractile SMC	ITGB1
TMEM47	0	0.963126	0.745	0.313	0	Contractile SMC	TMEM47
CFL2	0	0.960812	0.794	0.433	0	Contractile SMC	CFL2
CAMK2G	0	0.960697	0.709	0.205	0	Contractile SMC	CAMK2G
SOD3	0	0.953098	0.9	0.629	0	Contractile SMC	SOD3
ADAMTS1	0	0.950215	0.9	0.6	0	Contractile SMC	ADAMTS1
NTRK3	0	0.949905	0.641	0.087	0	Contractile SMC	NTRK3
MRPL33	0	0.94803	0.816	0.604	0	Contractile SMC	MRPL33
CAV2	0	0.947906	0.81	0.377	0	Contractile SMC	CAV2
ENAH	0	0.946763	0.835	0.516	0	Contractile SMC	ENAH
MYH9	0	0.944359	0.932	0.705	0	Contractile SMC	MYH9
ALDH1B1	0	0.938123	0.606	0.11	0	Contractile SMC	ALDH1B1
PPP1CB	0	0.937471	0.939	0.758	0	Contractile SMC	PPP1CB
LINC00702	0	0.934105	0.697	0.189	0	Contractile SMC	LINC00702
HSPB8	0	0.932818	0.67	0.252	0	Contractile SMC	HSPB8
ZFHX3	0	0.930305	0.909	0.686	0	Contractile SMC	ZFHX3
KANK2	0	0.928115	0.852	0.533	0	Contractile SMC	KANK2
AOPEP	0	0.922007	0.778	0.37	0	Contractile SMC	AOPEP
RBPMS2	0	0.918519	0.575	0.051	0	Contractile SMC	RBPMS2
PDE5A	0	0.914799	0.751	0.295	0	Contractile SMC	PDE5A
NPNT	0	0.914533	0.657	0.112	0	Contractile SMC	NPNT
EGR1	0	0.905328	0.864	0.755	0	Contractile SMC	EGR1
ROCK2	0	0.901702	0.872	0.6	0	Contractile SMC	ROCK2
FERMT2	0	0.898604	0.902	0.615	0	Contractile SMC	FERMT2
AKAP1	0	0.893521	0.678	0.197	0	Contractile SMC	AKAP1
PDLIM3	0	0.892323	0.902	0.522	0	Contractile SMC	PDLIM3
COL4A1	0	0.891445	0.937	0.62	0	Contractile SMC	COL4A1
LDB3	0	0.891416	0.592	0.064	0	Contractile SMC	LDB3
JUNB	0	0.887999	0.989	0.957	0	Contractile SMC	JUNB
JAG1	0	0.887757	0.797	0.407	0	Contractile SMC	JAG1
LDOC1	0	0.885618	0.655	0.184	0	Contractile SMC	LDOC1
EDIL3	0	0.884356	0.756	0.254	0	Contractile SMC	EDIL3
FAM207A	0	0.882941	0.66	0.356	0	Contractile SMC	FAM207A
DACT3	0	0.882833	0.664	0.138	0	Contractile SMC	DACT3
SBDS	0	0.88226	0.913	0.772	0	Contractile SMC	SBDS
ROCK1	0	0.880943	0.923	0.783	0	Contractile SMC	ROCK1
MOB2	0	0.879005	0.734	0.391	0	Contractile SMC	MOB2
IGFBP7	0	0.87027	0.996	0.87	0	Contractile SMC	IGFBP7
HEY2	0	0.869789	0.656	0.157	0	Contractile SMC	HEY2
ADRA2C	0	0.868024	0.558	0.077	0	Contractile SMC	ADRA2C
PCSK7	0	0.867579	0.746	0.411	0	Contractile SMC	PCSK7
FOS	0	0.867249	0.989	0.932	0	Contractile SMC	FOS
LIMS2	0	0.864364	0.74	0.244	0	Contractile SMC	LIMS2
PPP1R3C	0	0.862271	0.575	0.146	0	Contractile SMC	PPP1R3C
PAWR	0	0.859478	0.762	0.326	0	Contractile SMC	PAWR
UBA2	0	0.858076	0.812	0.498	0	Contractile SMC	UBA2
RAP1A	0	0.852348	0.795	0.596	0	Contractile SMC	RAP1A
PTMS	0	0.850075	0.929	0.81	0	Contractile SMC	PTMS
STK38L	0	0.840551	0.713	0.387	0	Contractile SMC	STK38L
COL4A2	0	0.835552	0.946	0.634	0	Contractile SMC	COL4A2
CYFIP2	0	0.827084	0.546	0.111	0	Contractile SMC	CYFIP2
PMEPA1	0	0.825233	0.836	0.404	0	Contractile SMC	PMEPA1
PLEKHO1	0	0.825068	0.79	0.508	0	Contractile SMC	PLEKHO1
MXI1	0	0.818899	0.807	0.527	0	Contractile SMC	MXI1
CBX6	0	0.816349	0.77	0.394	0	Contractile SMC	CBX6
TES	0	0.81508	0.678	0.335	0	Contractile SMC	TES
ECRG4	0	0.814201	0.524	0.139	0	Contractile SMC	ECRG4
DST	0	0.812759	0.932	0.707	0	Contractile SMC	DST
CCDC6	0	0.809591	0.739	0.438	0	Contractile SMC	CCDC6
MTRNR2L12	0	0.805244	0.992	0.986	0	Contractile SMC	MTRNR2L12
CPED1	0	0.801885	0.716	0.4	0	Contractile SMC	CPED1
KIF5B	0	0.799751	0.872	0.729	0	Contractile SMC	KIF5B
MT-ND4L	0	0.797926	0.964	0.917	0	Contractile SMC	MT-ND4L
SBSPON	0	0.79119	0.59	0.069	0	Contractile SMC	SBSPON
NCS1	0	0.786341	0.667	0.244	0	Contractile SMC	NCS1
ITIH5	0	0.780994	0.624	0.236	0	Contractile SMC	ITIH5
ATL3	0	0.779074	0.819	0.588	0	Contractile SMC	ATL3
MAP3K20	0	0.776734	0.844	0.594	0	Contractile SMC	MAP3K20
AKAP6	0	0.776482	0.54	0.066	0	Contractile SMC	AKAP6
PTP4A3	0	0.773958	0.488	0.088	0	Contractile SMC	PTP4A3
CAMTA1	0	0.767959	0.766	0.585	0	Contractile SMC	CAMTA1
SOST	0	0.765753	0.312	0.032	0	Contractile SMC	SOST
HSPB6	0	0.76493	0.772	0.488	0	Contractile SMC	HSPB6
ITIH3	0	0.764724	0.513	0.044	0	Contractile SMC	ITIH3
ID2	0	0.763573	0.882	0.83	0	Contractile SMC	ID2
MRGPRF	0	0.762149	0.647	0.306	0	Contractile SMC	MRGPRF
ATP1A2	0	0.762084	0.514	0.046	0	Contractile SMC	ATP1A2
MGST3	0	0.761194	0.9	0.807	0	Contractile SMC	MGST3
HACD1	0	0.758883	0.613	0.121	0	Contractile SMC	HACD1
PGM5	0	0.755588	0.674	0.224	0	Contractile SMC	PGM5
ESAM	0	0.754274	0.676	0.16	0	Contractile SMC	ESAM
FRY	0	0.751318	0.612	0.173	0	Contractile SMC	FRY
ADCY5	0	0.751252	0.556	0.055	0	Contractile SMC	ADCY5
LTBP1	0	0.748958	0.872	0.461	0	Contractile SMC	LTBP1
YAP1	0	0.748464	0.74	0.427	0	Contractile SMC	YAP1
MYO1C	0	0.747188	0.803	0.53	0	Contractile SMC	MYO1C
WFDC1	0	0.746585	0.476	0.054	0	Contractile SMC	WFDC1
CALM2	0	0.743268	0.952	0.923	0	Contractile SMC	CALM2
P2RX1	0	0.742927	0.413	0.047	0	Contractile SMC	P2RX1
GPRC5C	0	0.739974	0.542	0.103	0	Contractile SMC	GPRC5C
ARHGEF17	0	0.739801	0.631	0.188	0	Contractile SMC	ARHGEF17
COX7A1	0	0.739318	0.765	0.563	0	Contractile SMC	COX7A1
MAGED2	0	0.739202	0.799	0.552	0	Contractile SMC	MAGED2
GJA4	0	0.737484	0.526	0.103	0	Contractile SMC	GJA4
TBX2	0	0.734312	0.445	0.103	0	Contractile SMC	TBX2
SUN2	0	0.73415	0.833	0.558	0	Contractile SMC	SUN2
DMPK	0	0.732383	0.591	0.147	0	Contractile SMC	DMPK
SSBP3	0	0.731602	0.682	0.352	0	Contractile SMC	SSBP3
RYR2	0	0.727235	0.486	0.038	0	Contractile SMC	RYR2
LMCD1	0	0.724634	0.661	0.439	0	Contractile SMC	LMCD1
CAV1	0	0.722124	0.926	0.651	0	Contractile SMC	CAV1
TBC1D1	0	0.719198	0.704	0.334	0	Contractile SMC	TBC1D1
HCFC1R1	0	0.715983	0.711	0.529	0	Contractile SMC	HCFC1R1
FXYD1	0	0.710329	0.795	0.577	0	Contractile SMC	FXYD1
SGCA	0	0.707798	0.661	0.216	0	Contractile SMC	SGCA
MPRIP	0	0.707206	0.753	0.45	0	Contractile SMC	MPRIP
SCRG1	0	0.701312	0.519	0.204	0	Contractile SMC	SCRG1
TJP1	0	0.700897	0.756	0.454	0	Contractile SMC	TJP1
ADGRL3	0	0.699037	0.533	0.084	0	Contractile SMC	ADGRL3
COX20	0	0.696798	0.77	0.585	0	Contractile SMC	COX20
PPDPF	0	0.695291	0.859	0.823	0	Contractile SMC	PPDPF
COL14A1	0	0.694751	0.926	0.574	0	Contractile SMC	COL14A1
HES1	0	0.690168	0.771	0.527	0	Contractile SMC	HES1
ITPR1	0	0.687694	0.667	0.282	0	Contractile SMC	ITPR1
MT-ND3	0	0.687611	0.998	0.994	0	Contractile SMC	MT-ND3
PDGFA	0	0.681767	0.677	0.268	0	Contractile SMC	PDGFA
LIMCH1	0	0.680937	0.676	0.333	0	Contractile SMC	LIMCH1
LAMA5	0	0.677829	0.569	0.132	0	Contractile SMC	LAMA5
FBXW5	0	0.676689	0.745	0.523	0	Contractile SMC	FBXW5
NFIA	0	0.673108	0.922	0.743	0	Contractile SMC	NFIA
TENT5B	0	0.672877	0.498	0.063	0	Contractile SMC	TENT5B
MPP7	0	0.670724	0.519	0.074	0	Contractile SMC	MPP7
DYNLT1	0	0.670694	0.77	0.564	0	Contractile SMC	DYNLT1
MYOM1	0	0.66469	0.49	0.076	0	Contractile SMC	MYOM1
PTGER3	0	0.662789	0.516	0.096	0	Contractile SMC	PTGER3
MAP4	0	0.662395	0.883	0.695	0	Contractile SMC	MAP4
INPP5A	0	0.661034	0.582	0.183	0	Contractile SMC	INPP5A
NCKAP1	0	0.660782	0.777	0.485	0	Contractile SMC	NCKAP1
NR4A1	0	0.66033	0.915	0.796	0	Contractile SMC	NR4A1
PDE3A	0	0.658905	0.603	0.207	0	Contractile SMC	PDE3A
ENDOD1	0	0.655866	0.642	0.273	0	Contractile SMC	ENDOD1
TMTC1	0	0.655025	0.624	0.235	0	Contractile SMC	TMTC1
GUCY1A1	0	0.653448	0.612	0.207	0	Contractile SMC	GUCY1A1
COX6C	0	0.653255	0.862	0.823	0	Contractile SMC	COX6C
CSDE1	0	0.653106	0.917	0.857	0	Contractile SMC	CSDE1
EIF5B	0	0.650961	0.817	0.677	0	Contractile SMC	EIF5B
PYGB	0	0.649711	0.583	0.251	0	Contractile SMC	PYGB
JAK2	0	0.649608	0.567	0.235	0	Contractile SMC	JAK2
VIM	0	0.647853	1	0.997	0	Contractile SMC	VIM
NPTN	0	0.644397	0.737	0.464	0	Contractile SMC	NPTN
CD82	0	0.643547	0.647	0.28	0	Contractile SMC	CD82
ITIH4	0	0.642998	0.467	0.085	0	Contractile SMC	ITIH4
ITGA3	0	0.640293	0.539	0.112	0	Contractile SMC	ITGA3
PTK2	0	0.63412	0.715	0.43	0	Contractile SMC	PTK2
JPH2	0	0.633789	0.504	0.048	0	Contractile SMC	JPH2
TMEM181	0	0.631818	0.524	0.262	0	Contractile SMC	TMEM181
CALM1	0	0.630359	0.966	0.952	0	Contractile SMC	CALM1
CAP2	0	0.628982	0.546	0.147	0	Contractile SMC	CAP2
BTG2	0	0.626387	0.884	0.766	0	Contractile SMC	BTG2
SLC20A2	0	0.624346	0.575	0.226	0	Contractile SMC	SLC20A2
ATP5MD	0	0.614668	0.837	0.797	0	Contractile SMC	ATP5MD
TPM4	0	0.614153	0.972	0.894	0	Contractile SMC	TPM4
TSPAN2	0	0.611131	0.561	0.115	0	Contractile SMC	TSPAN2
TWSG1	0	0.604638	0.653	0.366	0	Contractile SMC	TWSG1
DKK3	0	0.604392	0.635	0.281	0	Contractile SMC	DKK3
S1PR3	0	0.601743	0.552	0.249	0	Contractile SMC	S1PR3
NR2F2	0	0.600569	0.856	0.582	0	Contractile SMC	NR2F2
SCUBE3	0	0.600387	0.437	0.052	0	Contractile SMC	SCUBE3
TCEAL4	0	0.595749	0.86	0.75	0	Contractile SMC	TCEAL4
KIF1C	0	0.592262	0.622	0.293	0	Contractile SMC	KIF1C
ANAPC16	0	0.590668	0.825	0.727	0	Contractile SMC	ANAPC16
RABGAP1	0	0.590103	0.632	0.342	0	Contractile SMC	RABGAP1
SMARCD3	0	0.588559	0.537	0.246	0	Contractile SMC	SMARCD3
MAOA	0	0.587972	0.713	0.442	0	Contractile SMC	MAOA
SYNE1	0	0.587849	0.808	0.596	0	Contractile SMC	SYNE1
PLP2	0	0.585232	0.807	0.67	0	Contractile SMC	PLP2
PCGF5	0	0.582904	0.694	0.453	0	Contractile SMC	PCGF5
SMAD9	0	0.580985	0.524	0.199	0	Contractile SMC	SMAD9
SNTA1	0	0.57728	0.589	0.237	0	Contractile SMC	SNTA1
SHROOM3	0	0.576883	0.44	0.085	0	Contractile SMC	SHROOM3
PTMA	0	0.575497	0.995	0.994	0	Contractile SMC	PTMA
ID1	0	0.575127	0.605	0.349	0	Contractile SMC	ID1
NDUFC1	0	0.573123	0.768	0.601	0	Contractile SMC	NDUFC1
SYNE2	0	0.572862	0.797	0.443	0	Contractile SMC	SYNE2
MACF1	0	0.571233	0.887	0.768	0	Contractile SMC	MACF1
CYB5R3	0	0.568715	0.879	0.729	0	Contractile SMC	CYB5R3
SH3BGR	0	0.568402	0.445	0.091	0	Contractile SMC	SH3BGR
KANK1	0	0.565225	0.567	0.259	0	Contractile SMC	KANK1
FOXC2	0	0.561658	0.6	0.207	0	Contractile SMC	FOXC2
SLC38A1	0	0.561368	0.588	0.214	0	Contractile SMC	SLC38A1
FZD3	0	0.560532	0.421	0.07	0	Contractile SMC	FZD3
MBNL1	0	0.559078	0.943	0.892	0	Contractile SMC	MBNL1
ARHGAP10	0	0.55889	0.75	0.533	0	Contractile SMC	ARHGAP10
NDUFB7	0	0.558702	0.795	0.7	0	Contractile SMC	NDUFB7
PBXIP1	0	0.556401	0.66	0.365	0	Contractile SMC	PBXIP1
EHD2	0	0.554789	0.76	0.495	0	Contractile SMC	EHD2
RORB	0	0.552682	0.338	0.051	0	Contractile SMC	RORB
NRGN	0	0.552221	0.383	0.098	0	Contractile SMC	NRGN
SUSD2	0	0.551039	0.436	0.136	0	Contractile SMC	SUSD2
SKP1	0	0.549357	0.93	0.882	0	Contractile SMC	SKP1
CACNA1C	0	0.548608	0.448	0.138	0	Contractile SMC	CACNA1C
EHBP1L1	0	0.548275	0.663	0.372	0	Contractile SMC	EHBP1L1
RASGRP2	0	0.54645	0.526	0.143	0	Contractile SMC	RASGRP2
MYEF2	0	0.546294	0.46	0.105	0	Contractile SMC	MYEF2
CHURC1	0	0.546165	0.829	0.736	0	Contractile SMC	CHURC1
ANGPT1	0	0.545483	0.589	0.275	0	Contractile SMC	ANGPT1
PLEKHG3	0	0.545449	0.444	0.106	0	Contractile SMC	PLEKHG3
MEF2C	0	0.545133	0.787	0.454	0	Contractile SMC	MEF2C
DPYSL3	0	0.544524	0.715	0.473	0	Contractile SMC	DPYSL3
NKD1	0	0.543433	0.425	0.088	0	Contractile SMC	NKD1
ZBTB16	0	0.542116	0.871	0.673	0	Contractile SMC	ZBTB16
DTNA	0	0.539426	0.467	0.11	0	Contractile SMC	DTNA
ALDH2	0	0.53431	0.796	0.615	0	Contractile SMC	ALDH2
PRDM6	0	0.53223	0.461	0.133	0	Contractile SMC	PRDM6
C1QTNF1	0	0.530744	0.752	0.409	0	Contractile SMC	C1QTNF1
NRN1	0	0.527451	0.513	0.224	0	Contractile SMC	NRN1
THRA	0	0.523824	0.663	0.42	0	Contractile SMC	THRA
FADS3	0	0.523739	0.675	0.425	0	Contractile SMC	FADS3
SEPTIN7	0	0.522273	0.928	0.879	0	Contractile SMC	SEPTIN7
COBLL1	0	0.522083	0.657	0.388	0	Contractile SMC	COBLL1
COX7A2	0	0.519154	0.854	0.819	0	Contractile SMC	COX7A2
ARHGEF10L	0	0.518884	0.494	0.192	0	Contractile SMC	ARHGEF10L
FLNC	0	0.518569	0.384	0.121	0	Contractile SMC	FLNC
IGF1R	0	0.518204	0.597	0.337	0	Contractile SMC	IGF1R
SIVA1	0	0.517051	0.772	0.662	0	Contractile SMC	SIVA1
STAC2	0	0.516195	0.302	0.025	0	Contractile SMC	STAC2
MT-ND2	0	0.514719	0.996	0.994	0	Contractile SMC	MT-ND2
MAP7D3	0	0.514685	0.665	0.437	0	Contractile SMC	MAP7D3
CRNDE	0	0.513356	0.537	0.247	0	Contractile SMC	CRNDE
C4orf3	0	0.511673	0.823	0.732	0	Contractile SMC	C4orf3
ACADL	0	0.511558	0.44	0.139	0	Contractile SMC	ACADL
NBEAL1	0	0.51112	0.642	0.441	0	Contractile SMC	NBEAL1
COX7C	0	0.506454	0.942	0.934	0	Contractile SMC	COX7C
SNHG14	0	0.50528	0.568	0.355	0	Contractile SMC	SNHG14
ENTPD1	0	0.504276	0.543	0.189	0	Contractile SMC	ENTPD1
CSDC2	0	0.500473	0.409	0.049	0	Contractile SMC	CSDC2
VASN	0	0.500314	0.716	0.443	0	Contractile SMC	VASN
JUN	2.34677e-201	0.6222	0.98	0.96	7.21281e-197	Contractile SMC	JUN
ZFP36	5.49377e-134	0.551669	0.924	0.894	1.68851e-129	Contractile SMC	ZFP36
HBB	3.74506e-08	2.2436	0.177	0.154	0.00115104	Contractile SMC	HBB
CXCL8	0	5.70961	0.887	0.234	0	Mono/Mac	CXCL8
IL1B	0	5.29553	0.643	0.095	0	Mono/Mac	IL1B
CCL3	0	4.71377	0.851	0.158	0	Mono/Mac	CCL3
EREG	0	4.70891	0.502	0.046	0	Mono/Mac	EREG
RNASE1	0	4.38991	0.896	0.169	0	Mono/Mac	RNASE1
C1QA	0	4.35807	0.881	0.107	0	Mono/Mac	C1QA
C1QB	0	4.25628	0.837	0.095	0	Mono/Mac	C1QB
CCL20	0	4.05963	0.435	0.052	0	Mono/Mac	CCL20
CXCL3	0	4.02368	0.81	0.263	0	Mono/Mac	CXCL3
CCL4	0	3.84983	0.767	0.153	0	Mono/Mac	CCL4
HLA-DRA	0	3.76955	0.917	0.214	0	Mono/Mac	HLA-DRA
CD163	0	3.739	0.939	0.047	0	Mono/Mac	CD163
SPP1	0	3.64278	0.368	0.068	0	Mono/Mac	SPP1
TYROBP	0	3.54786	0.98	0.064	0	Mono/Mac	TYROBP
CD74	0	3.54543	0.944	0.291	0	Mono/Mac	CD74
CTSB	0	3.54017	0.988	0.672	0	Mono/Mac	CTSB
CCL3L1	0	3.48494	0.59	0.06	0	Mono/Mac	CCL3L1
C1QC	0	3.41391	0.828	0.038	0	Mono/Mac	C1QC
AIF1	0	3.40921	0.96	0.045	0	Mono/Mac	AIF1
S100A9	0	3.40574	0.787	0.06	0	Mono/Mac	S100A9
CTSS	0	3.30431	0.974	0.204	0	Mono/Mac	CTSS
MRC1	0	3.25847	0.874	0.032	0	Mono/Mac	MRC1
SRGN	0	3.21415	0.98	0.377	0	Mono/Mac	SRGN
IFI30	0	3.18541	0.935	0.097	0	Mono/Mac	IFI30
FCGR2A	0	3.17816	0.957	0.067	0	Mono/Mac	FCGR2A
HLA-DRB1	0	3.16232	0.873	0.245	0	Mono/Mac	HLA-DRB1
LAPTM5	0	3.15799	0.97	0.089	0	Mono/Mac	LAPTM5
GPR183	0	3.15646	0.853	0.106	0	Mono/Mac	GPR183
FCER1G	0	3.15156	0.966	0.062	0	Mono/Mac	FCER1G
PLEK	0	3.14335	0.908	0.043	0	Mono/Mac	PLEK
F13A1	0	3.11864	0.747	0.036	0	Mono/Mac	F13A1
C5AR1	0	3.11583	0.913	0.044	0	Mono/Mac	C5AR1
BCL2A1	0	3.11263	0.747	0.05	0	Mono/Mac	BCL2A1
VSIG4	0	3.04063	0.898	0.035	0	Mono/Mac	VSIG4
LYZ	0	3.03517	0.914	0.027	0	Mono/Mac	LYZ
MS4A6A	0	2.93842	0.911	0.032	0	Mono/Mac	MS4A6A
PLAUR	0	2.91389	0.881	0.376	0	Mono/Mac	PLAUR
CXCL2	0	2.88358	0.842	0.401	0	Mono/Mac	CXCL2
SERPINB2	0	2.86553	0.2	0.023	0	Mono/Mac	SERPINB2
G0S2	0	2.85391	0.489	0.199	0	Mono/Mac	G0S2
CD83	0	2.83637	0.861	0.139	0	Mono/Mac	CD83
LYVE1	0	2.80195	0.707	0.057	0	Mono/Mac	LYVE1
TNFAIP3	0	2.79747	0.85	0.347	0	Mono/Mac	TNFAIP3
HMOX1	0	2.75731	0.838	0.286	0	Mono/Mac	HMOX1
INSIG1	0	2.75045	0.782	0.311	0	Mono/Mac	INSIG1
HLA-DPA1	0	2.66664	0.738	0.225	0	Mono/Mac	HLA-DPA1
LUCAT1	0	2.64213	0.667	0.086	0	Mono/Mac	LUCAT1
CD68	0	2.6126	0.947	0.355	0	Mono/Mac	CD68
PLTP	0	2.60212	0.842	0.425	0	Mono/Mac	PLTP
MAFB	0	2.5884	0.907	0.377	0	Mono/Mac	MAFB
MARCO	0	2.57988	0.571	0.025	0	Mono/Mac	MARCO
CD14	0	2.57801	0.842	0.128	0	Mono/Mac	CD14
CCL4L2	0	2.56623	0.471	0.05	0	Mono/Mac	CCL4L2
HLA-DPB1	0	2.55227	0.713	0.308	0	Mono/Mac	HLA-DPB1
MS4A7	0	2.49556	0.89	0.018	0	Mono/Mac	MS4A7
CTSZ	0	2.47982	0.949	0.643	0	Mono/Mac	CTSZ
FTL	0	2.47378	1	0.998	0	Mono/Mac	FTL
SAT1	0	2.4484	0.989	0.869	0	Mono/Mac	SAT1
S100A8	0	2.43275	0.461	0.02	0	Mono/Mac	S100A8
CYBB	0	2.40601	0.866	0.017	0	Mono/Mac	CYBB
OLR1	0	2.3524	0.528	0.018	0	Mono/Mac	OLR1
IL1RN	0	2.31757	0.48	0.017	0	Mono/Mac	IL1RN
STAB1	0	2.2925	0.834	0.073	0	Mono/Mac	STAB1
SELENOP	0	2.25942	0.75	0.542	0	Mono/Mac	SELENOP
FOLR2	0	2.22293	0.712	0.02	0	Mono/Mac	FOLR2
RGS1	0	2.18287	0.545	0.051	0	Mono/Mac	RGS1
PTGS2	0	2.17326	0.516	0.293	0	Mono/Mac	PTGS2
HSPH1	0	2.16802	0.916	0.746	0	Mono/Mac	HSPH1
ITGB2	0	2.14048	0.895	0.04	0	Mono/Mac	ITGB2
CTSD	0	2.13181	0.938	0.796	0	Mono/Mac	CTSD
LCP1	0	2.11612	0.914	0.066	0	Mono/Mac	LCP1
FCGR3A	0	2.09372	0.77	0.026	0	Mono/Mac	FCGR3A
SGK1	0	2.0501	0.757	0.359	0	Mono/Mac	SGK1
CXCL1	0	2.01789	0.343	0.075	0	Mono/Mac	CXCL1
MARCKS	0	1.99437	0.94	0.592	0	Mono/Mac	MARCKS
AREG	0	1.96981	0.423	0.062	0	Mono/Mac	AREG
NFKBIA	0	1.9554	0.96	0.877	0	Mono/Mac	NFKBIA
IER3	0	1.95403	0.941	0.729	0	Mono/Mac	IER3
RASGEF1B	0	1.95352	0.795	0.134	0	Mono/Mac	RASGEF1B
MSR1	0	1.93805	0.757	0.018	0	Mono/Mac	MSR1
CD44	0	1.92517	0.932	0.717	0	Mono/Mac	CD44
NPC2	0	1.92425	0.971	0.717	0	Mono/Mac	NPC2
VAMP8	0	1.91833	0.84	0.077	0	Mono/Mac	VAMP8
CSF1R	0	1.89005	0.789	0.016	0	Mono/Mac	CSF1R
MS4A4A	0	1.88411	0.724	0.016	0	Mono/Mac	MS4A4A
SLC16A10	0	1.83655	0.624	0.017	0	Mono/Mac	SLC16A10
TNF	0	1.8274	0.458	0.03	0	Mono/Mac	TNF
CYBA	0	1.80183	0.951	0.505	0	Mono/Mac	CYBA
SERPINB9	0	1.79168	0.613	0.152	0	Mono/Mac	SERPINB9
HLA-DQB1	0	1.78109	0.632	0.077	0	Mono/Mac	HLA-DQB1
PLIN2	0	1.77407	0.924	0.59	0	Mono/Mac	PLIN2
PHLDA1	0	1.76877	0.6	0.298	0	Mono/Mac	PHLDA1
ACSL1	0	1.75725	0.793	0.288	0	Mono/Mac	ACSL1
NR4A2	0	1.74274	0.77	0.554	0	Mono/Mac	NR4A2
SPI1	0	1.74203	0.847	0.016	0	Mono/Mac	SPI1
NFKB1	0	1.74037	0.755	0.468	0	Mono/Mac	NFKB1
TNFRSF1B	0	1.7316	0.797	0.178	0	Mono/Mac	TNFRSF1B
MAF	0	1.73113	0.697	0.293	0	Mono/Mac	MAF
FTH1	0	1.72535	1	0.996	0	Mono/Mac	FTH1
IL10	0	1.72	0.476	0.013	0	Mono/Mac	IL10
FCGRT	0	1.7141	0.94	0.663	0	Mono/Mac	FCGRT
IER5	0	1.70304	0.802	0.586	0	Mono/Mac	IER5
CD84	0	1.70248	0.736	0.018	0	Mono/Mac	CD84
LGMN	0	1.70189	0.695	0.462	0	Mono/Mac	LGMN
PSAP	0	1.69687	0.984	0.895	0	Mono/Mac	PSAP
ZEB2	0	1.68831	0.948	0.737	0	Mono/Mac	ZEB2
PHACTR1	0	1.68221	0.766	0.282	0	Mono/Mac	PHACTR1
HCLS1	0	1.66792	0.834	0.077	0	Mono/Mac	HCLS1
RBM47	0	1.66631	0.79	0.033	0	Mono/Mac	RBM47
ATP2B1	0	1.66251	0.792	0.456	0	Mono/Mac	ATP2B1
AQP9	0	1.66211	0.431	0.011	0	Mono/Mac	AQP9
MMP19	0	1.66174	0.517	0.161	0	Mono/Mac	MMP19
IQGAP2	0	1.66127	0.759	0.044	0	Mono/Mac	IQGAP2
MFSD1	0	1.6522	0.838	0.304	0	Mono/Mac	MFSD1
TNFAIP2	0	1.65141	0.805	0.329	0	Mono/Mac	TNFAIP2
HSP90AA1	0	1.64943	0.994	0.979	0	Mono/Mac	HSP90AA1
UPP1	0	1.64406	0.74	0.285	0	Mono/Mac	UPP1
KLF6	0	1.6415	0.962	0.879	0	Mono/Mac	KLF6
SAMSN1	0	1.63754	0.62	0.047	0	Mono/Mac	SAMSN1
TNFAIP8	0	1.63732	0.709	0.305	0	Mono/Mac	TNFAIP8
GK	0	1.6371	0.589	0.066	0	Mono/Mac	GK
HLA-DMA	0	1.63286	0.731	0.122	0	Mono/Mac	HLA-DMA
SOD2	0	1.63282	0.971	0.887	0	Mono/Mac	SOD2
REL	0	1.6322	0.871	0.42	0	Mono/Mac	REL
SDCBP	0	1.62746	0.959	0.73	0	Mono/Mac	SDCBP
BTG1	0	1.62066	0.947	0.875	0	Mono/Mac	BTG1
HIF1A	0	1.61817	0.898	0.655	0	Mono/Mac	HIF1A
MXD1	0	1.60626	0.695	0.256	0	Mono/Mac	MXD1
KCTD12	0	1.60594	0.819	0.302	0	Mono/Mac	KCTD12
MIR155HG	0	1.59616	0.462	0.063	0	Mono/Mac	MIR155HG
SLC11A1	0	1.59318	0.661	0.047	0	Mono/Mac	SLC11A1
LCP2	0	1.59153	0.77	0.056	0	Mono/Mac	LCP2
ITGAX	0	1.59138	0.606	0.015	0	Mono/Mac	ITGAX
FNIP2	0	1.58898	0.724	0.37	0	Mono/Mac	FNIP2
CTSL	0	1.58354	0.856	0.689	0	Mono/Mac	CTSL
COTL1	0	1.58306	0.832	0.271	0	Mono/Mac	COTL1
ABCA1	0	1.58175	0.805	0.36	0	Mono/Mac	ABCA1
PTPRE	0	1.57371	0.796	0.102	0	Mono/Mac	PTPRE
C15orf48	0	1.57225	0.423	0.02	0	Mono/Mac	C15orf48
C1orf162	0	1.56539	0.728	0.031	0	Mono/Mac	C1orf162
HLA-DQA1	0	1.55773	0.387	0.037	0	Mono/Mac	HLA-DQA1
ARHGAP18	0	1.5525	0.805	0.216	0	Mono/Mac	ARHGAP18
EIF4E	0	1.55069	0.648	0.426	0	Mono/Mac	EIF4E
ICAM1	0	1.55021	0.78	0.33	0	Mono/Mac	ICAM1
NAMPT	0	1.53998	0.951	0.833	0	Mono/Mac	NAMPT
BLVRB	0	1.5397	0.859	0.641	0	Mono/Mac	BLVRB
CFLAR	0	1.53941	0.855	0.669	0	Mono/Mac	CFLAR
DUSP6	0	1.52504	0.603	0.17	0	Mono/Mac	DUSP6
ASAH1	0	1.50764	0.887	0.564	0	Mono/Mac	ASAH1
PTPRC	0	1.50472	0.884	0.071	0	Mono/Mac	PTPRC
CREG1	0	1.5022	0.852	0.606	0	Mono/Mac	CREG1
KDM6B	0	1.49182	0.771	0.41	0	Mono/Mac	KDM6B
KYNU	0	1.48993	0.63	0.009	0	Mono/Mac	KYNU
NINJ1	0	1.48275	0.778	0.341	0	Mono/Mac	NINJ1
NLRP3	0	1.47751	0.538	0.01	0	Mono/Mac	NLRP3
RNASET2	0	1.47749	0.804	0.277	0	Mono/Mac	RNASET2
LST1	0	1.47193	0.741	0.016	0	Mono/Mac	LST1
CPM	0	1.47169	0.701	0.168	0	Mono/Mac	CPM
TFRC	0	1.46717	0.6	0.245	0	Mono/Mac	TFRC
FYB1	0	1.46304	0.743	0.052	0	Mono/Mac	FYB1
IGSF6	0	1.46156	0.609	0.011	0	Mono/Mac	IGSF6
EMB	0	1.46142	0.679	0.044	0	Mono/Mac	EMB
HSPD1	0	1.46017	0.894	0.839	0	Mono/Mac	HSPD1
BIRC3	0	1.46002	0.571	0.283	0	Mono/Mac	BIRC3
GRB2	0	1.45819	0.885	0.521	0	Mono/Mac	GRB2
FAM107B	0	1.45781	0.692	0.385	0	Mono/Mac	FAM107B
CD93	0	1.45293	0.717	0.134	0	Mono/Mac	CD93
GRN	0	1.45138	0.897	0.633	0	Mono/Mac	GRN
TPM3	0	1.44376	0.942	0.653	0	Mono/Mac	TPM3
ALOX5AP	0	1.44182	0.659	0.047	0	Mono/Mac	ALOX5AP
PPP1R15B	0	1.43626	0.819	0.52	0	Mono/Mac	PPP1R15B
ADAP2	0	1.43591	0.68	0.029	0	Mono/Mac	ADAP2
DUSP2	0	1.43388	0.622	0.096	0	Mono/Mac	DUSP2
EVI2B	0	1.42895	0.723	0.048	0	Mono/Mac	EVI2B
B3GNT5	0	1.42483	0.608	0.046	0	Mono/Mac	B3GNT5
NRP2	0	1.42448	0.688	0.184	0	Mono/Mac	NRP2
ARRB2	0	1.41691	0.799	0.085	0	Mono/Mac	ARRB2
SLCO2B1	0	1.41144	0.657	0.019	0	Mono/Mac	SLCO2B1
CXCL16	0	1.40452	0.739	0.128	0	Mono/Mac	CXCL16
ZFAND2A	0	1.40261	0.647	0.376	0	Mono/Mac	ZFAND2A
TGFBI	0	1.39899	0.841	0.319	0	Mono/Mac	TGFBI
C3AR1	0	1.39896	0.668	0.011	0	Mono/Mac	C3AR1
SNX10	0	1.39591	0.647	0.034	0	Mono/Mac	SNX10
AC020916.1	0	1.39126	0.81	0.569	0	Mono/Mac	AC020916.1
MPP1	0	1.39098	0.745	0.144	0	Mono/Mac	MPP1
EHD1	0	1.3876	0.589	0.37	0	Mono/Mac	EHD1
PDE4B	0	1.38689	0.673	0.248	0	Mono/Mac	PDE4B
MPEG1	0	1.38356	0.639	0.008	0	Mono/Mac	MPEG1
RNF144B	0	1.37637	0.653	0.043	0	Mono/Mac	RNF144B
CD37	0	1.37045	0.785	0.069	0	Mono/Mac	CD37
THBD	0	1.36152	0.575	0.258	0	Mono/Mac	THBD
SMAP2	0	1.35906	0.818	0.237	0	Mono/Mac	SMAP2
RGS2	0	1.35883	0.638	0.438	0	Mono/Mac	RGS2
FABP5	0	1.35691	0.555	0.153	0	Mono/Mac	FABP5
IL10RA	0	1.35326	0.775	0.06	0	Mono/Mac	IL10RA
LHFPL2	0	1.35199	0.729	0.318	0	Mono/Mac	LHFPL2
FAM49B	0	1.35038	0.763	0.134	0	Mono/Mac	FAM49B
CCDC88A	0	1.34973	0.852	0.462	0	Mono/Mac	CCDC88A
RNASE6	0	1.33367	0.67	0.009	0	Mono/Mac	RNASE6
OTUD1	0	1.33209	0.648	0.288	0	Mono/Mac	OTUD1
IL18	0	1.33041	0.694	0.05	0	Mono/Mac	IL18
CD53	0	1.32444	0.77	0.044	0	Mono/Mac	CD53
DNAJA4	0	1.32386	0.477	0.23	0	Mono/Mac	DNAJA4
H2AFY	0	1.32292	0.852	0.518	0	Mono/Mac	H2AFY
LIPA	0	1.31808	0.634	0.257	0	Mono/Mac	LIPA
TPP1	0	1.31774	0.838	0.41	0	Mono/Mac	TPP1
GPR34	0	1.317	0.525	0.014	0	Mono/Mac	GPR34
SH3BGRL3	0	1.31341	0.966	0.824	0	Mono/Mac	SH3BGRL3
DNAJB6	0	1.30965	0.905	0.778	0	Mono/Mac	DNAJB6
MGAT1	0	1.30514	0.86	0.549	0	Mono/Mac	MGAT1
FCGBP	0	1.30499	0.3	0.011	0	Mono/Mac	FCGBP
DSE	0	1.3048	0.799	0.464	0	Mono/Mac	DSE
PELI1	0	1.30288	0.695	0.266	0	Mono/Mac	PELI1
NEAT1	0	1.29996	0.986	0.982	0	Mono/Mac	NEAT1
CLEC7A	0	1.29738	0.654	0.01	0	Mono/Mac	CLEC7A
LILRB5	0	1.29582	0.532	0.011	0	Mono/Mac	LILRB5
CPVL	0	1.2925	0.687	0.152	0	Mono/Mac	CPVL
ATP6V0C	0	1.27998	0.949	0.765	0	Mono/Mac	ATP6V0C
MNDA	0	1.27987	0.589	0.038	0	Mono/Mac	MNDA
LYN	0	1.27749	0.735	0.096	0	Mono/Mac	LYN
MAP3K8	0	1.27676	0.768	0.522	0	Mono/Mac	MAP3K8
ABL2	0	1.2709	0.756	0.491	0	Mono/Mac	ABL2
GNA13	0	1.26905	0.765	0.298	0	Mono/Mac	GNA13
LITAF	0	1.25668	0.82	0.644	0	Mono/Mac	LITAF
ZNF267	0	1.25419	0.674	0.226	0	Mono/Mac	ZNF267
CCRL2	0	1.25263	0.512	0.018	0	Mono/Mac	CCRL2
NCF2	0	1.25253	0.707	0.027	0	Mono/Mac	NCF2
HCST	0	1.25182	0.699	0.061	0	Mono/Mac	HCST
ARPC3	0	1.24248	0.945	0.81	0	Mono/Mac	ARPC3
ETS2	0	1.24068	0.849	0.539	0	Mono/Mac	ETS2
EZR	0	1.23952	0.757	0.341	0	Mono/Mac	EZR
GMFG	0	1.23806	0.767	0.083	0	Mono/Mac	GMFG
AZIN1-AS1	0	1.23777	0.408	0.074	0	Mono/Mac	AZIN1-AS1
HLA-DMB	0	1.23691	0.603	0.042	0	Mono/Mac	HLA-DMB
RBPJ	0	1.23126	0.869	0.675	0	Mono/Mac	RBPJ
PPIF	0	1.23072	0.564	0.239	0	Mono/Mac	PPIF
CD55	0	1.22377	0.771	0.454	0	Mono/Mac	CD55
CTSC	0	1.2235	0.738	0.301	0	Mono/Mac	CTSC
ATP13A3	0	1.21275	0.744	0.58	0	Mono/Mac	ATP13A3
BCAT1	0	1.21213	0.718	0.222	0	Mono/Mac	BCAT1
DAB2	0	1.20614	0.799	0.561	0	Mono/Mac	DAB2
EMILIN2	0	1.20525	0.781	0.255	0	Mono/Mac	EMILIN2
EPB41L3	0	1.20229	0.748	0.247	0	Mono/Mac	EPB41L3
EFHD2	0	1.18826	0.771	0.251	0	Mono/Mac	EFHD2
JARID2	0	1.18493	0.652	0.214	0	Mono/Mac	JARID2
ARL8B	0	1.18311	0.779	0.516	0	Mono/Mac	ARL8B
FCGR2B	0	1.1811	0.51	0.008	0	Mono/Mac	FCGR2B
LAIR1	0	1.17779	0.668	0.026	0	Mono/Mac	LAIR1
TLR2	0	1.17774	0.636	0.021	0	Mono/Mac	TLR2
NCKAP1L	0	1.17694	0.713	0.065	0	Mono/Mac	NCKAP1L
TMIGD3	0	1.17581	0.414	0.011	0	Mono/Mac	TMIGD3
ARHGDIB	0	1.16592	0.841	0.357	0	Mono/Mac	ARHGDIB
PLEKHB2	0	1.16236	0.763	0.348	0	Mono/Mac	PLEKHB2
MYO5A	0	1.16146	0.695	0.183	0	Mono/Mac	MYO5A
IL1A	0	1.15878	0.247	0.006	0	Mono/Mac	IL1A
TTN	0	1.15685	0.235	0.054	0	Mono/Mac	TTN
ATP2B1-AS1	0	1.14753	0.581	0.225	0	Mono/Mac	ATP2B1-AS1
SLA	0	1.14509	0.645	0.032	0	Mono/Mac	SLA
IL6R	0	1.14342	0.642	0.248	0	Mono/Mac	IL6R
TET2	0	1.14312	0.71	0.293	0	Mono/Mac	TET2
GLUL	0	1.13845	0.938	0.762	0	Mono/Mac	GLUL
IVNS1ABP	0	1.13838	0.702	0.32	0	Mono/Mac	IVNS1ABP
RNF130	0	1.1353	0.839	0.515	0	Mono/Mac	RNF130
MAP2K3	0	1.13525	0.73	0.402	0	Mono/Mac	MAP2K3
PLD3	0	1.11617	0.8	0.599	0	Mono/Mac	PLD3
RASGRP3	0	1.11585	0.458	0.031	0	Mono/Mac	RASGRP3
PIK3AP1	0	1.10893	0.652	0.009	0	Mono/Mac	PIK3AP1
UCP2	0	1.10853	0.62	0.057	0	Mono/Mac	UCP2
FRMD4B	0	1.10663	0.667	0.178	0	Mono/Mac	FRMD4B
MTSS1	0	1.10561	0.747	0.304	0	Mono/Mac	MTSS1
TYMP	0	1.1024	0.784	0.406	0	Mono/Mac	TYMP
CSGALNACT2	0	1.10229	0.705	0.387	0	Mono/Mac	CSGALNACT2
ATP6V0B	0	1.09526	0.854	0.618	0	Mono/Mac	ATP6V0B
DNAJA1	0	1.09419	0.925	0.82	0	Mono/Mac	DNAJA1
CSTB	0	1.09416	0.867	0.783	0	Mono/Mac	CSTB
CAPG	0	1.09027	0.62	0.316	0	Mono/Mac	CAPG
WTAP	0	1.08341	0.751	0.612	0	Mono/Mac	WTAP
DMXL2	0	1.07985	0.601	0.114	0	Mono/Mac	DMXL2
CLN8	0	1.07183	0.665	0.227	0	Mono/Mac	CLN8
RNF149	0	1.07153	0.742	0.338	0	Mono/Mac	RNF149
PPP1R15A	0	1.07055	0.96	0.898	0	Mono/Mac	PPP1R15A
EMP3	0	1.07015	0.918	0.732	0	Mono/Mac	EMP3
PYCARD	0	1.0685	0.712	0.285	0	Mono/Mac	PYCARD
AC016831.1	0	1.06547	0.51	0.213	0	Mono/Mac	AC016831.1
SLC1A3	0	1.05772	0.59	0.134	0	Mono/Mac	SLC1A3
GPR132	0	1.05347	0.437	0.011	0	Mono/Mac	GPR132
COLEC12	0	1.05185	0.623	0.302	0	Mono/Mac	COLEC12
AGFG1	0	1.05093	0.742	0.414	0	Mono/Mac	AGFG1
CPEB4	0	1.05003	0.752	0.401	0	Mono/Mac	CPEB4
ANXA1	0	1.0441	0.946	0.896	0	Mono/Mac	ANXA1
NFKBID	0	1.04337	0.572	0.092	0	Mono/Mac	NFKBID
JMJD1C	0	1.04255	0.86	0.758	0	Mono/Mac	JMJD1C
PFKFB3	0	1.03673	0.692	0.375	0	Mono/Mac	PFKFB3
NCOA4	0	1.03644	0.782	0.475	0	Mono/Mac	NCOA4
TUT7	0	1.03173	0.652	0.293	0	Mono/Mac	TUT7
OAZ1	0	1.03161	0.986	0.927	0	Mono/Mac	OAZ1
ADA2	0	1.0288	0.611	0.044	0	Mono/Mac	ADA2
CTSH	0	1.02515	0.714	0.229	0	Mono/Mac	CTSH
CMTM6	0	1.02379	0.788	0.492	0	Mono/Mac	CMTM6
PPT1	0	1.02354	0.714	0.393	0	Mono/Mac	PPT1
SLC43A2	0	1.01959	0.613	0.106	0	Mono/Mac	SLC43A2
CHORDC1	0	1.01922	0.758	0.574	0	Mono/Mac	CHORDC1
CREM	0	1.01849	0.717	0.456	0	Mono/Mac	CREM
FPR1	0	1.01713	0.558	0.008	0	Mono/Mac	FPR1
CD4	0	1.015	0.593	0.023	0	Mono/Mac	CD4
ACP5	0	1.01417	0.432	0.014	0	Mono/Mac	ACP5
IQGAP1	0	1.01388	0.942	0.849	0	Mono/Mac	IQGAP1
PRNP	0	1.01156	0.804	0.66	0	Mono/Mac	PRNP
SERPINB1	0	1.0062	0.774	0.538	0	Mono/Mac	SERPINB1
CEBPB	0	1.00428	0.953	0.862	0	Mono/Mac	CEBPB
2024-03-01	0	1.00423	0.528	0.013	0	Mono/Mac	2024-03-01
ARPC2	0	1.00401	0.956	0.843	0	Mono/Mac	ARPC2
IL1R2	0	1.00091	0.299	0.034	0	Mono/Mac	IL1R2
QKI	0	1.00043	0.912	0.753	0	Mono/Mac	QKI
C5AR2	0	1.00028	0.367	0.026	0	Mono/Mac	C5AR2
NCF4	0	0.998379	0.605	0.012	0	Mono/Mac	NCF4
SHTN1	0	0.998122	0.642	0.166	0	Mono/Mac	SHTN1
EVI2A	0	0.997882	0.615	0.074	0	Mono/Mac	EVI2A
RGS10	0	0.996074	0.705	0.339	0	Mono/Mac	RGS10
LILRB2	0	0.994187	0.58	0.007	0	Mono/Mac	LILRB2
HBEGF	0	0.992582	0.523	0.194	0	Mono/Mac	HBEGF
HERPUD1	0	0.991677	0.803	0.658	0	Mono/Mac	HERPUD1
TBXAS1	0	0.987074	0.624	0.026	0	Mono/Mac	TBXAS1
GPCPD1	0	0.986841	0.634	0.393	0	Mono/Mac	GPCPD1
MYO9B	0	0.981548	0.748	0.395	0	Mono/Mac	MYO9B
OGFRL1	0	0.980612	0.67	0.336	0	Mono/Mac	OGFRL1
ACTR2	0	0.978511	0.911	0.75	0	Mono/Mac	ACTR2
TRAF1	0	0.975827	0.355	0.091	0	Mono/Mac	TRAF1
MCL1	0	0.974439	0.938	0.864	0	Mono/Mac	MCL1
TAGAP	0	0.974097	0.494	0.039	0	Mono/Mac	TAGAP
FAM49A	0	0.969767	0.597	0.128	0	Mono/Mac	FAM49A
IRF8	0	0.962609	0.54	0.023	0	Mono/Mac	IRF8
RILPL2	0	0.962339	0.682	0.468	0	Mono/Mac	RILPL2
ATP6V1B2	0	0.961491	0.715	0.375	0	Mono/Mac	ATP6V1B2
BAZ1A	0	0.959404	0.744	0.47	0	Mono/Mac	BAZ1A
ARPC5	0	0.959259	0.929	0.806	0	Mono/Mac	ARPC5
ARPC1B	0	0.958669	0.89	0.673	0	Mono/Mac	ARPC1B
ITGAM	0	0.954198	0.595	0.011	0	Mono/Mac	ITGAM
TNIP3	0	0.954198	0.165	0.008	0	Mono/Mac	TNIP3
MCOLN1	0	0.95409	0.61	0.218	0	Mono/Mac	MCOLN1
HLA-B	0	0.95387	0.979	0.779	0	Mono/Mac	HLA-B
CD300E	0	0.953374	0.333	0.009	0	Mono/Mac	CD300E
NAIP	0	0.953118	0.574	0.108	0	Mono/Mac	NAIP
DOK2	0	0.93795	0.59	0.04	0	Mono/Mac	DOK2
FERMT3	0	0.935152	0.623	0.074	0	Mono/Mac	FERMT3
PABPC1	0	0.933556	0.973	0.913	0	Mono/Mac	PABPC1
PNPLA8	0	0.933263	0.716	0.517	0	Mono/Mac	PNPLA8
TLR4	0	0.931891	0.58	0.156	0	Mono/Mac	TLR4
ANXA5	0	0.931451	0.958	0.873	0	Mono/Mac	ANXA5
AP1B1	0	0.930717	0.638	0.169	0	Mono/Mac	AP1B1
SEMA6B	0	0.928303	0.453	0.049	0	Mono/Mac	SEMA6B
AKAP13	0	0.92338	0.909	0.764	0	Mono/Mac	AKAP13
ME2	0	0.920367	0.568	0.242	0	Mono/Mac	ME2
NPL	0	0.916665	0.506	0.02	0	Mono/Mac	NPL
SH2B3	0	0.91569	0.619	0.093	0	Mono/Mac	SH2B3
FNBP1	0	0.915269	0.788	0.514	0	Mono/Mac	FNBP1
LPXN	0	0.911516	0.512	0.06	0	Mono/Mac	LPXN
CYTH1	0	0.910508	0.65	0.166	0	Mono/Mac	CYTH1
LGALS9	0	0.909785	0.594	0.065	0	Mono/Mac	LGALS9
IFNGR2	0	0.909349	0.678	0.371	0	Mono/Mac	IFNGR2
SYK	0	0.909194	0.56	0.007	0	Mono/Mac	SYK
CEP170	0	0.909136	0.714	0.401	0	Mono/Mac	CEP170
RAB7A	0	0.908915	0.863	0.695	0	Mono/Mac	RAB7A
ARL4C	0	0.908584	0.561	0.225	0	Mono/Mac	ARL4C
MYO1F	0	0.907891	0.591	0.043	0	Mono/Mac	MYO1F
SPAG9	0	0.906653	0.852	0.769	0	Mono/Mac	SPAG9
TAOK3	0	0.906242	0.738	0.44	0	Mono/Mac	TAOK3
BACH1	0	0.905887	0.685	0.398	0	Mono/Mac	BACH1
CCR1	0	0.904188	0.498	0.013	0	Mono/Mac	CCR1
ATP6V1F	0	0.900402	0.845	0.678	0	Mono/Mac	ATP6V1F
HAVCR2	0	0.895971	0.542	0.013	0	Mono/Mac	HAVCR2
SLC15A3	0	0.893826	0.606	0.082	0	Mono/Mac	SLC15A3
MMP9	0	0.893119	0.264	0.008	0	Mono/Mac	MMP9
AP1S2	0	0.890602	0.713	0.346	0	Mono/Mac	AP1S2
ATP6V0D1	0	0.889604	0.739	0.434	0	Mono/Mac	ATP6V0D1
VEGFA	0	0.889377	0.68	0.438	0	Mono/Mac	VEGFA
CD86	0	0.88624	0.543	0.005	0	Mono/Mac	CD86
TFEC	0	0.883473	0.53	0.005	0	Mono/Mac	TFEC
FPR3	0	0.880962	0.48	0.005	0	Mono/Mac	FPR3
SIGLEC1	0	0.880554	0.462	0.009	0	Mono/Mac	SIGLEC1
IL13RA1	0	0.880385	0.757	0.503	0	Mono/Mac	IL13RA1
LILRB4	0	0.876122	0.525	0.006	0	Mono/Mac	LILRB4
EIF4A3	0	0.873853	0.675	0.537	0	Mono/Mac	EIF4A3
ELF1	0	0.870635	0.814	0.591	0	Mono/Mac	ELF1
SKAP2	0	0.870008	0.675	0.284	0	Mono/Mac	SKAP2
NCF1	0	0.869695	0.44	0.017	0	Mono/Mac	NCF1
MERTK	0	0.866476	0.543	0.116	0	Mono/Mac	MERTK
MIR3945HG	0	0.865355	0.345	0.01	0	Mono/Mac	MIR3945HG
GNAI2	0	0.861667	0.929	0.789	0	Mono/Mac	GNAI2
HNRNPU	0	0.861365	0.951	0.927	0	Mono/Mac	HNRNPU
HSPA8	0	0.858506	0.919	0.871	0	Mono/Mac	HSPA8
LY96	0	0.856398	0.598	0.248	0	Mono/Mac	LY96
FCGR1A	0	0.85315	0.432	0.006	0	Mono/Mac	FCGR1A
RASSF4	0	0.849852	0.595	0.19	0	Mono/Mac	RASSF4
FMNL1	0	0.848224	0.598	0.079	0	Mono/Mac	FMNL1
KMO	0	0.846712	0.352	0.006	0	Mono/Mac	KMO
CYTH4	0	0.846387	0.515	0.012	0	Mono/Mac	CYTH4
CORO1A	0	0.845566	0.592	0.052	0	Mono/Mac	CORO1A
GLIPR1	0	0.843588	0.812	0.559	0	Mono/Mac	GLIPR1
SLC11A2	0	0.843125	0.585	0.229	0	Mono/Mac	SLC11A2
THEMIS2	0	0.842796	0.555	0.016	0	Mono/Mac	THEMIS2
GAA	0	0.84241	0.675	0.33	0	Mono/Mac	GAA
H3F3A	0	0.836265	0.987	0.955	0	Mono/Mac	H3F3A
FGL2	0	0.834951	0.644	0.387	0	Mono/Mac	FGL2
NRIP1	0	0.833665	0.631	0.383	0	Mono/Mac	NRIP1
DNTTIP2	0	0.83262	0.719	0.524	0	Mono/Mac	DNTTIP2
SLC16A6	0	0.830397	0.243	0.008	0	Mono/Mac	SLC16A6
CLK1	0	0.827313	0.829	0.748	0	Mono/Mac	CLK1
RHOG	0	0.826553	0.713	0.394	0	Mono/Mac	RHOG
TCN2	0	0.824471	0.513	0.129	0	Mono/Mac	TCN2
BMP2K	0	0.821065	0.583	0.201	0	Mono/Mac	BMP2K
RGL1	0	0.820638	0.489	0.175	0	Mono/Mac	RGL1
GPSM3	0	0.818537	0.605	0.061	0	Mono/Mac	GPSM3
LRRFIP1	0	0.818202	0.93	0.806	0	Mono/Mac	LRRFIP1
STK10	0	0.815683	0.567	0.1	0	Mono/Mac	STK10
FMN1	0	0.815325	0.492	0.04	0	Mono/Mac	FMN1
PIM3	0	0.814277	0.65	0.428	0	Mono/Mac	PIM3
RAP2B	0	0.812901	0.586	0.268	0	Mono/Mac	RAP2B
HCK	0	0.810935	0.533	0.005	0	Mono/Mac	HCK
MAP3K2	0	0.810588	0.768	0.597	0	Mono/Mac	MAP3K2
HEXA	0	0.809426	0.688	0.487	0	Mono/Mac	HEXA
AC007384.1	0	0.809323	0.445	0.02	0	Mono/Mac	AC007384.1
DDX3X	0	0.806338	0.941	0.872	0	Mono/Mac	DDX3X
APLP2	0	0.802273	0.946	0.871	0	Mono/Mac	APLP2
C6orf62	0	0.801937	0.656	0.341	0	Mono/Mac	C6orf62
RAB11FIP1	0	0.801857	0.63	0.257	0	Mono/Mac	RAB11FIP1
BRI3	0	0.801629	0.941	0.84	0	Mono/Mac	BRI3
AL133330.1	0	0.801004	0.39	0.096	0	Mono/Mac	AL133330.1
ZBTB43	0	0.800856	0.523	0.283	0	Mono/Mac	ZBTB43
STXBP2	0	0.793047	0.515	0.018	0	Mono/Mac	STXBP2
MAN2B1	0	0.792105	0.654	0.28	0	Mono/Mac	MAN2B1
WAS	0	0.79202	0.566	0.019	0	Mono/Mac	WAS
CSF3R	0	0.790791	0.469	0.013	0	Mono/Mac	CSF3R
NUMB	0	0.790453	0.655	0.392	0	Mono/Mac	NUMB
RAB31	0	0.788475	0.811	0.599	0	Mono/Mac	RAB31
TMSB10	0	0.787389	0.995	0.946	0	Mono/Mac	TMSB10
DYNC1H1	0	0.784388	0.84	0.745	0	Mono/Mac	DYNC1H1
DOCK2	0	0.783719	0.549	0.018	0	Mono/Mac	DOCK2
ALCAM	0	0.780625	0.621	0.313	0	Mono/Mac	ALCAM
SIRPA	0	0.780083	0.623	0.215	0	Mono/Mac	SIRPA
CHML	0	0.779483	0.449	0.198	0	Mono/Mac	CHML
PNP	0	0.77696	0.573	0.251	0	Mono/Mac	PNP
AHR	0	0.776494	0.725	0.509	0	Mono/Mac	AHR
PABPC4	0	0.775319	0.794	0.604	0	Mono/Mac	PABPC4
MYO1G	0	0.773052	0.416	0.02	0	Mono/Mac	MYO1G
PMAIP1	0	0.773026	0.419	0.093	0	Mono/Mac	PMAIP1
STX11	0	0.771993	0.494	0.078	0	Mono/Mac	STX11
TNFSF13	0	0.769753	0.513	0.119	0	Mono/Mac	TNFSF13
FGD4	0	0.769577	0.57	0.294	0	Mono/Mac	FGD4
PREX1	0	0.767692	0.62	0.15	0	Mono/Mac	PREX1
RAB5C	0	0.767621	0.817	0.636	0	Mono/Mac	RAB5C
CSF2RA	0	0.767543	0.489	0.01	0	Mono/Mac	CSF2RA
TTYH3	0	0.767382	0.531	0.078	0	Mono/Mac	TTYH3
EDEM1	0	0.763793	0.462	0.145	0	Mono/Mac	EDEM1
CLEC2B	0	0.763257	0.762	0.382	0	Mono/Mac	CLEC2B
HNRNPC	0	0.763216	0.927	0.841	0	Mono/Mac	HNRNPC
CXCR4	0	0.761924	0.582	0.081	0	Mono/Mac	CXCR4
WDR26	0	0.761346	0.679	0.405	0	Mono/Mac	WDR26
AP2A2	0	0.758223	0.597	0.354	0	Mono/Mac	AP2A2
ADAM17	0	0.756939	0.674	0.416	0	Mono/Mac	ADAM17
UNC93B1	0	0.756202	0.554	0.176	0	Mono/Mac	UNC93B1
NBPF19	0	0.755695	0.406	0.084	0	Mono/Mac	NBPF19
GNS	0	0.754584	0.714	0.461	0	Mono/Mac	GNS
GLA	0	0.75386	0.524	0.245	0	Mono/Mac	GLA
AC016831.5	0	0.753698	0.563	0.295	0	Mono/Mac	AC016831.5
ADAM9	0	0.753321	0.707	0.49	0	Mono/Mac	ADAM9
PDXK	0	0.74846	0.649	0.396	0	Mono/Mac	PDXK
SQSTM1	0	0.747718	0.952	0.916	0	Mono/Mac	SQSTM1
TKT	0	0.747216	0.857	0.727	0	Mono/Mac	TKT
FCN1	0	0.744046	0.238	0.008	0	Mono/Mac	FCN1
RIT1	0	0.743412	0.623	0.308	0	Mono/Mac	RIT1
ARL6IP1	0	0.74084	0.802	0.647	0	Mono/Mac	ARL6IP1
TMEM123	0	0.74067	0.733	0.556	0	Mono/Mac	TMEM123
CDC42EP3	0	0.739101	0.596	0.381	0	Mono/Mac	CDC42EP3
CLTC	0	0.737253	0.797	0.64	0	Mono/Mac	CLTC
RASSF2	0	0.736952	0.533	0.108	0	Mono/Mac	RASSF2
WIPF1	0	0.73673	0.744	0.496	0	Mono/Mac	WIPF1
GAS7	0	0.736326	0.668	0.303	0	Mono/Mac	GAS7
PDGFB	0	0.73509	0.325	0.051	0	Mono/Mac	PDGFB
MAPK6	0	0.734894	0.602	0.372	0	Mono/Mac	MAPK6
SERPINA1	0	0.733945	0.379	0.005	0	Mono/Mac	SERPINA1
AC020656.1	0	0.732796	0.395	0.014	0	Mono/Mac	AC020656.1
S100A4	0	0.729557	0.977	0.846	0	Mono/Mac	S100A4
PTAFR	0	0.727191	0.442	0.013	0	Mono/Mac	PTAFR
CD36	0	0.725976	0.355	0.056	0	Mono/Mac	CD36
POU2F2	0	0.72459	0.395	0.029	0	Mono/Mac	POU2F2
GAS2L3	0	0.722337	0.4	0.025	0	Mono/Mac	GAS2L3
SLC8B1	0	0.719717	0.46	0.205	0	Mono/Mac	SLC8B1
LSP1	0	0.718382	0.513	0.24	0	Mono/Mac	LSP1
TALDO1	0	0.718202	0.774	0.671	0	Mono/Mac	TALDO1
SFPQ	0	0.71691	0.882	0.775	0	Mono/Mac	SFPQ
GNA15	0	0.715257	0.488	0.011	0	Mono/Mac	GNA15
GPR84	0	0.715025	0.372	0.006	0	Mono/Mac	GPR84
FOXO3	0	0.713885	0.791	0.653	0	Mono/Mac	FOXO3
PILRA	0	0.713523	0.497	0.059	0	Mono/Mac	PILRA
TREM1	0	0.713275	0.366	0.011	0	Mono/Mac	TREM1
MIS18BP1	0	0.712822	0.505	0.265	0	Mono/Mac	MIS18BP1
CNDP2	0	0.712202	0.56	0.234	0	Mono/Mac	CNDP2
DAZAP2	0	0.712174	0.798	0.603	0	Mono/Mac	DAZAP2
ZFYVE16	0	0.710548	0.641	0.441	0	Mono/Mac	ZFYVE16
PGD	0	0.710515	0.555	0.255	0	Mono/Mac	PGD
RB1	0	0.709612	0.608	0.326	0	Mono/Mac	RB1
ANPEP	0	0.708946	0.478	0.256	0	Mono/Mac	ANPEP
LAMP1	0	0.707489	0.844	0.764	0	Mono/Mac	LAMP1
ARHGAP4	0	0.705448	0.507	0.034	0	Mono/Mac	ARHGAP4
USP36	0	0.703899	0.549	0.316	0	Mono/Mac	USP36
IRAK3	0	0.703319	0.558	0.285	0	Mono/Mac	IRAK3
RIPK2	0	0.703296	0.532	0.283	0	Mono/Mac	RIPK2
DSC2	0	0.702392	0.444	0.014	0	Mono/Mac	DSC2
SNX6	0	0.699347	0.801	0.719	0	Mono/Mac	SNX6
NABP1	0	0.698929	0.647	0.408	0	Mono/Mac	NABP1
B2M	0	0.698383	0.999	0.991	0	Mono/Mac	B2M
LILRB3	0	0.697584	0.452	0.014	0	Mono/Mac	LILRB3
LY86	0	0.694131	0.45	0.005	0	Mono/Mac	LY86
ETV3	0	0.693746	0.491	0.18	0	Mono/Mac	ETV3
CD302	0	0.692622	0.809	0.649	0	Mono/Mac	CD302
ATP6V1H	0	0.690384	0.569	0.3	0	Mono/Mac	ATP6V1H
VMO1	0	0.688535	0.311	0.038	0	Mono/Mac	VMO1
SMS	0	0.687554	0.651	0.487	0	Mono/Mac	SMS
BID	0	0.687416	0.482	0.132	0	Mono/Mac	BID
ARHGEF2	0	0.684293	0.601	0.356	0	Mono/Mac	ARHGEF2
SLC6A6	0	0.684269	0.5	0.121	0	Mono/Mac	SLC6A6
OSM	0	0.684219	0.285	0.009	0	Mono/Mac	OSM
CR1	0	0.68227	0.376	0.004	0	Mono/Mac	CR1
STK4	0	0.680886	0.65	0.331	0	Mono/Mac	STK4
MCTP1	0	0.68087	0.526	0.063	0	Mono/Mac	MCTP1
STK17B	0	0.680769	0.641	0.292	0	Mono/Mac	STK17B
SLC7A7	0	0.68039	0.485	0.053	0	Mono/Mac	SLC7A7
UBE2D3	0	0.679581	0.94	0.876	0	Mono/Mac	UBE2D3
CHD2	0	0.679511	0.8	0.626	0	Mono/Mac	CHD2
IDH1	0	0.678242	0.477	0.236	0	Mono/Mac	IDH1
RNF13	0	0.677797	0.733	0.544	0	Mono/Mac	RNF13
LPCAT1	0	0.677395	0.44	0.143	0	Mono/Mac	LPCAT1
CAPZA1	0	0.677386	0.714	0.467	0	Mono/Mac	CAPZA1
FGR	0	0.674304	0.43	0.023	0	Mono/Mac	FGR
AMPD3	0	0.673367	0.344	0.022	0	Mono/Mac	AMPD3
PTBP3	0	0.673008	0.681	0.411	0	Mono/Mac	PTBP3
CIITA	0	0.672351	0.378	0.026	0	Mono/Mac	CIITA
LACTB	0	0.669368	0.645	0.373	0	Mono/Mac	LACTB
PIK3R5	0	0.668637	0.455	0.01	0	Mono/Mac	PIK3R5
KIF1B	0	0.668333	0.68	0.522	0	Mono/Mac	KIF1B
PRDM1	0	0.668225	0.344	0.063	0	Mono/Mac	PRDM1
MT-CO1	0	0.667939	0.999	0.998	0	Mono/Mac	MT-CO1
DUSP5	0	0.666238	0.425	0.199	0	Mono/Mac	DUSP5
P2RX4	0	0.665473	0.527	0.189	0	Mono/Mac	P2RX4
DOCK8	0	0.661121	0.512	0.066	0	Mono/Mac	DOCK8
SH3KBP1	0	0.660937	0.627	0.279	0	Mono/Mac	SH3KBP1
HECA	0	0.66004	0.611	0.347	0	Mono/Mac	HECA
MGAT4A	0	0.659391	0.532	0.129	0	Mono/Mac	MGAT4A
FUCA1	0	0.659223	0.435	0.227	0	Mono/Mac	FUCA1
P2RX7	0	0.658979	0.387	0.038	0	Mono/Mac	P2RX7
RALGDS	0	0.657196	0.482	0.166	0	Mono/Mac	RALGDS
PTPN6	0	0.656951	0.456	0.017	0	Mono/Mac	PTPN6
ST8SIA4	0	0.65592	0.444	0.034	0	Mono/Mac	ST8SIA4
DUSP4	0	0.655728	0.271	0.047	0	Mono/Mac	DUSP4
ZDHHC20	0	0.655683	0.534	0.269	0	Mono/Mac	ZDHHC20
GM2A	0	0.654314	0.48	0.156	0	Mono/Mac	GM2A
YTHDF3	0	0.65395	0.628	0.401	0	Mono/Mac	YTHDF3
METRNL	0	0.652644	0.811	0.633	0	Mono/Mac	METRNL
CDV3	0	0.650322	0.854	0.757	0	Mono/Mac	CDV3
ZSWIM6	0	0.65004	0.58	0.268	0	Mono/Mac	ZSWIM6
C9orf72	0	0.646895	0.492	0.175	0	Mono/Mac	C9orf72
ERN1	0	0.644786	0.487	0.256	0	Mono/Mac	ERN1
ATP6AP1	0	0.642957	0.683	0.452	0	Mono/Mac	ATP6AP1
HLA-A	0	0.640975	0.977	0.92	0	Mono/Mac	HLA-A
HMGA1	0	0.640786	0.521	0.158	0	Mono/Mac	HMGA1
FXYD5	0	0.639502	0.776	0.455	0	Mono/Mac	FXYD5
ATP1B1	0	0.638994	0.411	0.124	0	Mono/Mac	ATP1B1
ARID3A	0	0.637571	0.42	0.08	0	Mono/Mac	ARID3A
ETF1	0	0.637488	0.717	0.552	0	Mono/Mac	ETF1
GPR137B	0	0.63743	0.459	0.124	0	Mono/Mac	GPR137B
PLXNC1	0	0.636208	0.425	0.093	0	Mono/Mac	PLXNC1
RCSD1	0	0.632432	0.467	0.093	0	Mono/Mac	RCSD1
YWHAZ	0	0.632126	0.927	0.876	0	Mono/Mac	YWHAZ
AFF4	0	0.631217	0.83	0.75	0	Mono/Mac	AFF4
PTK2B	0	0.628413	0.461	0.108	0	Mono/Mac	PTK2B
PLXND1	0	0.627162	0.607	0.337	0	Mono/Mac	PLXND1
CSTA	0	0.625824	0.432	0.071	0	Mono/Mac	CSTA
MANBA	0	0.625243	0.502	0.166	0	Mono/Mac	MANBA
TREM2	0	0.623424	0.291	0.003	0	Mono/Mac	TREM2
RAPGEF1	0	0.622951	0.579	0.278	0	Mono/Mac	RAPGEF1
VASP	0	0.622314	0.714	0.467	0	Mono/Mac	VASP
MPDU1	0	0.619779	0.477	0.201	0	Mono/Mac	MPDU1
DOT1L	0	0.618587	0.377	0.097	0	Mono/Mac	DOT1L
ST3GAL6	0	0.616887	0.368	0.046	0	Mono/Mac	ST3GAL6
NFKB2	0	0.616072	0.537	0.285	0	Mono/Mac	NFKB2
LAT2	0	0.615033	0.42	0.011	0	Mono/Mac	LAT2
ALOX5	0	0.610768	0.423	0.007	0	Mono/Mac	ALOX5
CASP1	0	0.610768	0.411	0.06	0	Mono/Mac	CASP1
SNN	0	0.609301	0.44	0.137	0	Mono/Mac	SNN
CKS2	0	0.606146	0.389	0.153	0	Mono/Mac	CKS2
DENND5A	0	0.605466	0.545	0.334	0	Mono/Mac	DENND5A
SLC31A2	0	0.604512	0.478	0.136	0	Mono/Mac	SLC31A2
ATP6V1A	0	0.603869	0.52	0.242	0	Mono/Mac	ATP6V1A
TSPO	0	0.601679	0.879	0.785	0	Mono/Mac	TSPO
RNASEK	0	0.600887	0.944	0.87	0	Mono/Mac	RNASEK
SH3BP2	0	0.600287	0.47	0.103	0	Mono/Mac	SH3BP2
RHBDF2	0	0.599755	0.435	0.042	0	Mono/Mac	RHBDF2
CAP1	0	0.595724	0.853	0.761	0	Mono/Mac	CAP1
CLEC10A	0	0.594696	0.309	0.015	0	Mono/Mac	CLEC10A
ARHGAP45	0	0.593743	0.441	0.019	0	Mono/Mac	ARHGAP45
TMEM106A	0	0.593433	0.414	0.05	0	Mono/Mac	TMEM106A
CNPY3	0	0.591694	0.564	0.312	0	Mono/Mac	CNPY3
CDC42	0	0.590278	0.933	0.849	0	Mono/Mac	CDC42
ARHGAP26	0	0.589062	0.582	0.267	0	Mono/Mac	ARHGAP26
CYB5R4	0	0.588971	0.485	0.157	0	Mono/Mac	CYB5R4
LPAR6	0	0.588556	0.409	0.147	0	Mono/Mac	LPAR6
PARP14	0	0.587903	0.618	0.381	0	Mono/Mac	PARP14
MAFG	0	0.587814	0.594	0.396	0	Mono/Mac	MAFG
KCNE1	0	0.586776	0.316	0.006	0	Mono/Mac	KCNE1
ATP6V1C1	0	0.586745	0.575	0.342	0	Mono/Mac	ATP6V1C1
EHD4	0	0.58608	0.565	0.284	0	Mono/Mac	EHD4
RELT	0	0.585469	0.427	0.072	0	Mono/Mac	RELT
APBB1IP	0	0.584916	0.527	0.204	0	Mono/Mac	APBB1IP
AC090559.1	0	0.584383	0.37	0.005	0	Mono/Mac	AC090559.1
PTPRJ	0	0.58284	0.442	0.04	0	Mono/Mac	PTPRJ
NUP214	0	0.581044	0.529	0.229	0	Mono/Mac	NUP214
DRAM1	0	0.581037	0.551	0.321	0	Mono/Mac	DRAM1
FKBP15	0	0.579951	0.484	0.185	0	Mono/Mac	FKBP15
TMSB4X	0	0.579026	0.997	0.994	0	Mono/Mac	TMSB4X
DOCK4	0	0.578256	0.482	0.127	0	Mono/Mac	DOCK4
M6PR	0	0.578186	0.628	0.417	0	Mono/Mac	M6PR
ACTR3	0	0.575532	0.842	0.738	0	Mono/Mac	ACTR3
CELF1	0	0.573462	0.643	0.427	0	Mono/Mac	CELF1
BST2	0	0.570489	0.651	0.217	0	Mono/Mac	BST2
PLEKHO2	0	0.567731	0.474	0.159	0	Mono/Mac	PLEKHO2
GRINA	0	0.567454	0.638	0.434	0	Mono/Mac	GRINA
RAC1	0	0.567439	0.957	0.886	0	Mono/Mac	RAC1
CLEC12A	0	0.567335	0.282	0.008	0	Mono/Mac	CLEC12A
PAG1	0	0.566835	0.405	0.114	0	Mono/Mac	PAG1
PPP4R3A	0	0.566263	0.608	0.404	0	Mono/Mac	PPP4R3A
SERP1	0	0.565662	0.868	0.765	0	Mono/Mac	SERP1
PLEKHA2	0	0.564774	0.53	0.216	0	Mono/Mac	PLEKHA2
LRRC25	0	0.562989	0.371	0.004	0	Mono/Mac	LRRC25
HEXB	0	0.561306	0.693	0.49	0	Mono/Mac	HEXB
MBP	0	0.560948	0.603	0.349	0	Mono/Mac	MBP
ATP5F1E	0	0.559876	0.982	0.941	0	Mono/Mac	ATP5F1E
RIN3	0	0.559635	0.459	0.086	0	Mono/Mac	RIN3
SLC16A3	0	0.558518	0.43	0.108	0	Mono/Mac	SLC16A3
CLIC1	0	0.558004	0.928	0.866	0	Mono/Mac	CLIC1
TET3	0	0.557709	0.418	0.061	0	Mono/Mac	TET3
ATP6V0A1	0	0.556891	0.527	0.32	0	Mono/Mac	ATP6V0A1
PARVG	0	0.556458	0.424	0.014	0	Mono/Mac	PARVG
IRAK1	0	0.554058	0.515	0.267	0	Mono/Mac	IRAK1
C2	0	0.554056	0.33	0.108	0	Mono/Mac	C2
DEDD2	0	0.553854	0.512	0.282	0	Mono/Mac	DEDD2
ARHGAP30	0	0.553711	0.417	0.019	0	Mono/Mac	ARHGAP30
GNPDA1	0	0.551227	0.497	0.261	0	Mono/Mac	GNPDA1
OTULINL	0	0.549447	0.396	0.047	0	Mono/Mac	OTULINL
AZIN1	0	0.549181	0.618	0.425	0	Mono/Mac	AZIN1
TGFB1	0	0.548224	0.675	0.439	0	Mono/Mac	TGFB1
IFNAR2	0	0.546919	0.472	0.223	0	Mono/Mac	IFNAR2
SMIM25	0	0.545868	0.333	0.013	0	Mono/Mac	SMIM25
MAP2K1	0	0.545289	0.496	0.225	0	Mono/Mac	MAP2K1
ZNF207	0	0.544223	0.779	0.654	0	Mono/Mac	ZNF207
ABI1	0	0.542905	0.631	0.428	0	Mono/Mac	ABI1
INPP5D	0	0.54274	0.41	0.034	0	Mono/Mac	INPP5D
RAB20	0	0.541831	0.467	0.175	0	Mono/Mac	RAB20
RNF145	0	0.541606	0.621	0.44	0	Mono/Mac	RNF145
VPS37B	0	0.538579	0.489	0.211	0	Mono/Mac	VPS37B
KLHL6	0	0.537594	0.342	0.013	0	Mono/Mac	KLHL6
CFP	0	0.536568	0.267	0.006	0	Mono/Mac	CFP
ITSN2	0	0.534367	0.669	0.449	0	Mono/Mac	ITSN2
SYNGR2	0	0.533652	0.543	0.227	0	Mono/Mac	SYNGR2
SIGLEC10	0	0.529907	0.292	0.007	0	Mono/Mac	SIGLEC10
RNASE2	0	0.526758	0.277	0.002	0	Mono/Mac	RNASE2
SCAMP2	0	0.525525	0.539	0.317	0	Mono/Mac	SCAMP2
GPBP1	0	0.524475	0.82	0.742	0	Mono/Mac	GPBP1
NFKBIE	0	0.523699	0.405	0.131	0	Mono/Mac	NFKBIE
ZNF217	0	0.522898	0.444	0.228	0	Mono/Mac	ZNF217
UBALD2	0	0.520468	0.595	0.365	0	Mono/Mac	UBALD2
GPRIN3	0	0.519474	0.38	0.05	0	Mono/Mac	GPRIN3
VOPP1	0	0.519009	0.486	0.258	0	Mono/Mac	VOPP1
SDS	0	0.51565	0.211	0.003	0	Mono/Mac	SDS
MKNK1	0	0.515123	0.495	0.246	0	Mono/Mac	MKNK1
GRK2	0	0.514182	0.52	0.233	0	Mono/Mac	GRK2
C4orf48	0	0.512645	0.479	0.211	0	Mono/Mac	C4orf48
GGA1	0	0.512593	0.496	0.221	0	Mono/Mac	GGA1
SGK3	0	0.511578	0.469	0.221	0	Mono/Mac	SGK3
RUNX1	0	0.509461	0.688	0.402	0	Mono/Mac	RUNX1
COLGALT1	0	0.509119	0.531	0.308	0	Mono/Mac	COLGALT1
AOAH	0	0.508911	0.348	0.012	0	Mono/Mac	AOAH
CARD16	0	0.50746	0.384	0.07	0	Mono/Mac	CARD16
DAPK1	0	0.506628	0.39	0.061	0	Mono/Mac	DAPK1
CD300A	0	0.501432	0.323	0.009	0	Mono/Mac	CD300A
BTK	0	0.501097	0.345	0.007	0	Mono/Mac	BTK
PICALM	0	0.500185	0.743	0.577	0	Mono/Mac	PICALM
THBS1	1.59391e-305	2.70238	0.601	0.465	4.89889e-301	Mono/Mac	THBS1
ZC3H12C	4.01622e-305	0.501045	0.327	0.136	1.23439e-300	Mono/Mac	ZC3H12C
SLC5A3	6.35385e-305	1.26193	0.593	0.431	1.95286e-300	Mono/Mac	SLC5A3
NANS	1.48198e-304	0.519183	0.588	0.403	4.55487e-300	Mono/Mac	NANS
USP15	2.20337e-302	0.505791	0.709	0.55	6.77206e-298	Mono/Mac	USP15
LAMP2	2.7501e-301	0.503372	0.786	0.651	8.45245e-297	Mono/Mac	LAMP2
ATP1B3	3.86947e-300	0.76612	0.794	0.711	1.18928e-295	Mono/Mac	ATP1B3
CACYBP	6.46345e-300	0.679435	0.718	0.604	1.98654e-295	Mono/Mac	CACYBP
CHMP1B	1.37276e-299	0.962783	0.742	0.634	4.21917e-295	Mono/Mac	CHMP1B
DPYD	3.14395e-299	0.505697	0.528	0.331	9.66293e-295	Mono/Mac	DPYD
DNAJB1	8.08286e-299	1.06198	0.918	0.863	2.48427e-294	Mono/Mac	DNAJB1
SLC7A5	6.01354e-294	0.521476	0.417	0.208	1.84826e-289	Mono/Mac	SLC7A5
BLVRA	8.65184e-294	0.550255	0.527	0.355	2.65914e-289	Mono/Mac	BLVRA
S100A10	1.26329e-293	0.554858	0.954	0.763	3.88273e-289	Mono/Mac	S100A10
EIF5	2.28815e-291	0.553044	0.895	0.827	7.03264e-287	Mono/Mac	EIF5
UBE2D1	4.39763e-290	0.619195	0.52	0.337	1.35161e-285	Mono/Mac	UBE2D1
SNX2	1.29715e-289	0.574021	0.684	0.576	3.98678e-285	Mono/Mac	SNX2
NQO2	6.29786e-289	0.596079	0.588	0.423	1.93565e-284	Mono/Mac	NQO2
DUSP1	1.86751e-288	0.912598	0.965	0.935	5.73978e-284	Mono/Mac	DUSP1
NFE2L2	1.62999e-287	0.725788	0.834	0.781	5.00978e-283	Mono/Mac	NFE2L2
ZC3H12A	3.59815e-287	0.516099	0.521	0.316	1.10589e-282	Mono/Mac	ZC3H12A
FCHO2	4.26011e-286	0.569339	0.568	0.392	1.30935e-281	Mono/Mac	FCHO2
OXSR1	2.86414e-282	0.553245	0.485	0.292	8.80294e-278	Mono/Mac	OXSR1
CFL1	1.87122e-280	0.502676	0.957	0.908	5.75121e-276	Mono/Mac	CFL1
HSPA5	9.25642e-279	1.32404	0.848	0.797	2.84496e-274	Mono/Mac	HSPA5
STX7	4.27882e-277	0.523717	0.608	0.436	1.31509e-272	Mono/Mac	STX7
BNIP3L	2.04239e-274	0.752808	0.839	0.746	6.27729e-270	Mono/Mac	BNIP3L
NFKBIZ	2.13574e-274	0.833109	0.82	0.709	6.56418e-270	Mono/Mac	NFKBIZ
SAP30	4.13384e-274	0.806216	0.581	0.447	1.27054e-269	Mono/Mac	SAP30
CAPZB	1.12135e-272	0.504912	0.867	0.791	3.44646e-268	Mono/Mac	CAPZB
GSTO1	2.61774e-271	0.630375	0.817	0.735	8.04563e-267	Mono/Mac	GSTO1
CTNNB1	8.43231e-270	0.665588	0.773	0.674	2.59167e-265	Mono/Mac	CTNNB1
ZFP36L1	1.23498e-267	0.826587	0.932	0.913	3.79571e-263	Mono/Mac	ZFP36L1
NUFIP2	4.50359e-267	0.603225	0.801	0.698	1.38418e-262	Mono/Mac	NUFIP2
PLK3	1.10846e-266	0.547427	0.535	0.341	3.40687e-262	Mono/Mac	PLK3
AP2S1	3.99729e-266	0.611622	0.786	0.69	1.22857e-261	Mono/Mac	AP2S1
PAPSS2	2.09103e-265	0.629997	0.479	0.282	6.42679e-261	Mono/Mac	PAPSS2
LINC-PINT	1.35328e-264	0.525493	0.743	0.599	4.1593e-260	Mono/Mac	LINC-PINT
UBC	1.6011e-261	0.703497	0.989	0.98	4.92099e-257	Mono/Mac	UBC
CD164	1.48079e-256	0.522212	0.821	0.78	4.55122e-252	Mono/Mac	CD164
VMP1	1.19957e-252	0.72799	0.883	0.754	3.68688e-248	Mono/Mac	VMP1
HNMT	1.56792e-250	0.508507	0.632	0.489	4.81899e-246	Mono/Mac	HNMT
PURB	1.94015e-250	0.562896	0.584	0.427	5.96305e-246	Mono/Mac	PURB
HSPE1	2.20976e-248	0.718505	0.884	0.852	6.79171e-244	Mono/Mac	HSPE1
ANKLE2	1.6225e-247	0.666952	0.583	0.435	4.98675e-243	Mono/Mac	ANKLE2
THAP2	8.15539e-244	0.685832	0.327	0.158	2.50656e-239	Mono/Mac	THAP2
SLC20A1	2.48754e-240	0.681566	0.552	0.372	7.64544e-236	Mono/Mac	SLC20A1
MAN1A1	1.7288e-239	0.847704	0.712	0.581	5.31348e-235	Mono/Mac	MAN1A1
IRS2	2.93057e-239	0.628857	0.604	0.448	9.00712e-235	Mono/Mac	IRS2
AKR1B1	9.20372e-237	0.552633	0.495	0.337	2.82876e-232	Mono/Mac	AKR1B1
HSPA6	1.32867e-236	0.83074	0.649	0.424	4.08368e-232	Mono/Mac	HSPA6
ATP1A1	5.3441e-235	0.565192	0.778	0.683	1.64251e-230	Mono/Mac	ATP1A1
RABGEF1	3.43574e-233	0.532837	0.458	0.292	1.05597e-228	Mono/Mac	RABGEF1
CITED2	1.84567e-232	0.838139	0.545	0.376	5.67267e-228	Mono/Mac	CITED2
PNRC1	1.59657e-229	0.712523	0.969	0.951	4.90704e-225	Mono/Mac	PNRC1
MIR222HG	2.7441e-228	0.580744	0.403	0.224	8.43398e-224	Mono/Mac	MIR222HG
ARL5B	1.25678e-227	0.738887	0.564	0.417	3.86271e-223	Mono/Mac	ARL5B
PDE4DIP	4.42664e-225	0.67636	0.739	0.661	1.36053e-220	Mono/Mac	PDE4DIP
B4GALT1	9.79627e-222	0.524903	0.712	0.584	3.01088e-217	Mono/Mac	B4GALT1
TUBA1C	2.57107e-218	0.535837	0.619	0.482	7.90219e-214	Mono/Mac	TUBA1C
MIDN	1.36816e-217	0.617921	0.729	0.62	4.20503e-213	Mono/Mac	MIDN
ACSL3	1.08961e-216	0.60464	0.625	0.503	3.3489e-212	Mono/Mac	ACSL3
HSPA1A	2.00728e-212	0.695136	0.97	0.938	6.16937e-208	Mono/Mac	HSPA1A
NEU1	5.03051e-212	0.750141	0.574	0.435	1.54613e-207	Mono/Mac	NEU1
TOP1	2.28626e-209	0.566579	0.732	0.65	7.02682e-205	Mono/Mac	TOP1
ACSL4	4.03283e-208	0.646478	0.554	0.411	1.23949e-203	Mono/Mac	ACSL4
RGCC	1.55373e-205	0.569134	0.508	0.31	4.77539e-201	Mono/Mac	RGCC
TANK	2.61495e-202	0.526192	0.628	0.523	8.03706e-198	Mono/Mac	TANK
STX4	1.264e-199	0.508163	0.566	0.434	3.88489e-195	Mono/Mac	STX4
STIP1	1.00364e-196	0.505432	0.569	0.444	3.08468e-192	Mono/Mac	STIP1
SNAP23	2.6429e-189	0.507645	0.569	0.448	8.12296e-185	Mono/Mac	SNAP23
PTPN1	1.18565e-182	0.651854	0.518	0.394	3.64409e-178	Mono/Mac	PTPN1
RYBP	1.75054e-181	0.573844	0.588	0.481	5.38029e-177	Mono/Mac	RYBP
FNDC3A	9.0938e-181	0.590673	0.62	0.521	2.79498e-176	Mono/Mac	FNDC3A
MTRNR2L8	9.5411e-176	0.758097	0.912	0.87	2.93246e-171	Mono/Mac	MTRNR2L8
HSP90AB1	8.50446e-175	0.601679	0.98	0.971	2.61385e-170	Mono/Mac	HSP90AB1
PLAU	1.11681e-170	0.578083	0.395	0.243	3.43252e-166	Mono/Mac	PLAU
LIMS1	5.1388e-167	0.778384	0.752	0.721	1.57941e-162	Mono/Mac	LIMS1
RANBP2	5.84077e-166	0.623498	0.652	0.562	1.79516e-161	Mono/Mac	RANBP2
FOSL2	1.76155e-164	0.693718	0.707	0.683	5.41411e-160	Mono/Mac	FOSL2
B4GALT5	6.58765e-164	0.533703	0.419	0.283	2.02471e-159	Mono/Mac	B4GALT5
HMGB2	6.77475e-161	0.538718	0.634	0.556	2.08222e-156	Mono/Mac	HMGB2
NR4A3	3.96774e-148	0.820431	0.489	0.372	1.21948e-143	Mono/Mac	NR4A3
FOSB	1.33042e-147	0.634331	0.896	0.846	4.08903e-143	Mono/Mac	FOSB
KLF4	5.24548e-145	0.878121	0.728	0.699	1.6122e-140	Mono/Mac	KLF4
ARRDC3	1.26086e-142	0.592472	0.605	0.5	3.87526e-138	Mono/Mac	ARRDC3
USP12	7.46883e-137	0.573913	0.536	0.445	2.29555e-132	Mono/Mac	USP12
SLC25A37	1.54587e-117	0.860827	0.549	0.477	4.75124e-113	Mono/Mac	SLC25A37
TNIP1	1.63763e-117	0.528618	0.468	0.369	5.03326e-113	Mono/Mac	TNIP1
BASP1	7.38223e-111	1.0147	0.571	0.476	2.26893e-106	Mono/Mac	BASP1
FKBP4	4.68653e-102	0.521022	0.501	0.436	1.44041e-97	Mono/Mac	FKBP4
ERO1B	3.41172e-97	0.535054	0.37	0.26	1.04859e-92	Mono/Mac	ERO1B
HSPA1B	1.87445e-93	0.581964	0.894	0.878	5.76113e-89	Mono/Mac	HSPA1B
TRA2B	5.48734e-86	0.710693	0.816	0.817	1.68653e-81	Mono/Mac	TRA2B
GBP2	2.58978e-83	0.548157	0.595	0.577	7.95969e-79	Mono/Mac	GBP2
AC037198.1	3.11956e-81	0.540755	0.222	0.136	9.58797e-77	Mono/Mac	AC037198.1
JMY	1.34474e-76	0.505178	0.446	0.381	4.13305e-72	Mono/Mac	JMY
BAG3	1.02938e-72	0.815506	0.641	0.631	3.16381e-68	Mono/Mac	BAG3
GPNMB	1.23045e-60	0.651062	0.625	0.625	3.78179e-56	Mono/Mac	GPNMB
BCAS2	4.00934e-58	0.54421	0.525	0.507	1.23227e-53	Mono/Mac	BCAS2
MAP4K4	5.5285e-56	0.644834	0.543	0.513	1.69919e-51	Mono/Mac	MAP4K4
SLC40A1	1.27279e-08	0.697368	0.372	0.398	0.000391193	Mono/Mac	SLC40A1
PLA2G2A	0	4.87475	0.903	0.218	0	Fibroblast	PLA2G2A
APOD	0	4.71186	0.958	0.292	0	Fibroblast	APOD
CFD	0	4.71071	0.966	0.427	0	Fibroblast	CFD
CXCL14	0	4.01001	0.753	0.109	0	Fibroblast	CXCL14
DCN	0	3.58332	0.999	0.512	0	Fibroblast	DCN
FBLN1	0	3.25945	0.984	0.425	0	Fibroblast	FBLN1
CCDC80	0	3.1772	0.957	0.465	0	Fibroblast	CCDC80
IGF1	0	3.11807	0.886	0.148	0	Fibroblast	IGF1
SERPINF1	0	3.03839	0.983	0.341	0	Fibroblast	SERPINF1
MFAP5	0	3.02365	0.888	0.142	0	Fibroblast	MFAP5
MMP2	0	3.00103	0.972	0.246	0	Fibroblast	MMP2
SFRP2	0	2.95385	0.758	0.183	0	Fibroblast	SFRP2
FGF7	0	2.83289	0.928	0.136	0	Fibroblast	FGF7
C3	0	2.7948	0.925	0.091	0	Fibroblast	C3
C7	0	2.75013	0.714	0.153	0	Fibroblast	C7
C1R	0	2.46229	0.991	0.594	0	Fibroblast	C1R
C1S	0	2.43398	0.983	0.498	0	Fibroblast	C1S
MGST1	0	2.38903	0.931	0.133	0	Fibroblast	MGST1
SFRP1	0	2.33569	0.821	0.046	0	Fibroblast	SFRP1
PTGDS	0	2.3134	0.402	0.081	0	Fibroblast	PTGDS
FBLN2	0	2.22559	0.941	0.194	0	Fibroblast	FBLN2
GPX3	0	2.22163	0.92	0.578	0	Fibroblast	GPX3
PTX3	0	2.20472	0.568	0.107	0	Fibroblast	PTX3
CTSK	0	2.19443	0.859	0.223	0	Fibroblast	CTSK
SFRP4	0	2.15471	0.669	0.153	0	Fibroblast	SFRP4
COL6A3	0	2.13932	0.961	0.328	0	Fibroblast	COL6A3
PRG4	0	2.03718	0.43	0.078	0	Fibroblast	PRG4
RARRES1	0	2.02666	0.642	0.123	0	Fibroblast	RARRES1
NNMT	0	2.01219	0.982	0.69	0	Fibroblast	NNMT
FBN1	0	1.99679	0.953	0.411	0	Fibroblast	FBN1
PODN	0	1.90942	0.913	0.124	0	Fibroblast	PODN
SCARA5	0	1.90619	0.845	0.048	0	Fibroblast	SCARA5
RARRES2	0	1.87982	0.857	0.34	0	Fibroblast	RARRES2
IGFBP4	0	1.87132	0.94	0.486	0	Fibroblast	IGFBP4
EFEMP1	0	1.85858	0.956	0.448	0	Fibroblast	EFEMP1
GSN	0	1.83539	0.992	0.885	0	Fibroblast	GSN
APOE	0	1.81007	0.497	0.21	0	Fibroblast	APOE
OLFML3	0	1.80872	0.879	0.178	0	Fibroblast	OLFML3
SPOCK1	0	1.77866	0.896	0.161	0	Fibroblast	SPOCK1
PCOLCE	0	1.77787	0.893	0.249	0	Fibroblast	PCOLCE
CILP	0	1.77291	0.715	0.037	0	Fibroblast	CILP
SERPING1	0	1.77117	0.984	0.708	0	Fibroblast	SERPING1
ABI3BP	0	1.75489	0.938	0.376	0	Fibroblast	ABI3BP
ADH1B	0	1.74997	0.912	0.417	0	Fibroblast	ADH1B
MYOC	0	1.7456	0.463	0.068	0	Fibroblast	MYOC
FSTL1	0	1.73449	0.965	0.54	0	Fibroblast	FSTL1
ITM2A	0	1.73391	0.873	0.207	0	Fibroblast	ITM2A
ABCA8	0	1.71856	0.875	0.106	0	Fibroblast	ABCA8
ADM	0	1.7112	0.769	0.296	0	Fibroblast	ADM
AKR1C1	0	1.69247	0.828	0.171	0	Fibroblast	AKR1C1
SVEP1	0	1.68619	0.767	0.059	0	Fibroblast	SVEP1
CTHRC1	0	1.67846	0.774	0.267	0	Fibroblast	CTHRC1
GAS1	0	1.65085	0.776	0.099	0	Fibroblast	GAS1
COL1A2	0	1.63964	0.977	0.719	0	Fibroblast	COL1A2
SRPX	0	1.6358	0.874	0.164	0	Fibroblast	SRPX
COL3A1	0	1.63478	0.908	0.676	0	Fibroblast	COL3A1
LAMA2	0	1.63472	0.889	0.161	0	Fibroblast	LAMA2
PLPP3	0	1.63376	0.912	0.485	0	Fibroblast	PLPP3
MEG3	0	1.63319	0.872	0.152	0	Fibroblast	MEG3
SERPINA3	0	1.60409	0.79	0.122	0	Fibroblast	SERPINA3
COL1A1	0	1.56134	0.9	0.592	0	Fibroblast	COL1A1
COL12A1	0	1.56069	0.899	0.336	0	Fibroblast	COL12A1
MT1M	0	1.54441	0.906	0.515	0	Fibroblast	MT1M
LUM	0	1.54172	0.925	0.28	0	Fibroblast	LUM
KCNE4	0	1.51817	0.75	0.31	0	Fibroblast	KCNE4
TGFBR3	0	1.49669	0.849	0.252	0	Fibroblast	TGFBR3
PRRX1	0	1.49388	0.956	0.555	0	Fibroblast	PRRX1
UAP1	0	1.47879	0.897	0.401	0	Fibroblast	UAP1
MT2A	0	1.47048	0.992	0.901	0	Fibroblast	MT2A
TMEM176B	0	1.46857	0.638	0.155	0	Fibroblast	TMEM176B
PLAC9	0	1.46561	0.94	0.439	0	Fibroblast	PLAC9
THY1	0	1.46431	0.595	0.146	0	Fibroblast	THY1
MT1E	0	1.43599	0.93	0.537	0	Fibroblast	MT1E
PDGFRA	0	1.42064	0.872	0.175	0	Fibroblast	PDGFRA
SPON2	0	1.41098	0.768	0.1	0	Fibroblast	SPON2
H19	0	1.40941	0.409	0.1	0	Fibroblast	H19
COL6A1	0	1.40352	0.978	0.671	0	Fibroblast	COL6A1
DPT	0	1.40328	0.696	0.151	0	Fibroblast	DPT
IGFBP6	0	1.40242	0.891	0.603	0	Fibroblast	IGFBP6
IL1R1	0	1.38962	0.915	0.387	0	Fibroblast	IL1R1
DCLK1	0	1.37535	0.815	0.099	0	Fibroblast	DCLK1
VIT	0	1.3714	0.804	0.057	0	Fibroblast	VIT
RASD1	0	1.37033	0.632	0.155	0	Fibroblast	RASD1
TMEM176A	0	1.36376	0.622	0.134	0	Fibroblast	TMEM176A
MXRA8	0	1.35354	0.92	0.343	0	Fibroblast	MXRA8
PCSK5	0	1.35159	0.782	0.177	0	Fibroblast	PCSK5
NOVA1	0	1.34943	0.856	0.226	0	Fibroblast	NOVA1
S100A13	0	1.33541	0.955	0.529	0	Fibroblast	S100A13
COL6A2	0	1.31921	0.987	0.73	0	Fibroblast	COL6A2
TNFAIP6	0	1.31767	0.717	0.185	0	Fibroblast	TNFAIP6
CHRDL1	0	1.26364	0.756	0.07	0	Fibroblast	CHRDL1
CCDC71L	0	1.26321	0.777	0.366	0	Fibroblast	CCDC71L
MGP	0	1.25944	0.999	0.92	0	Fibroblast	MGP
CRISPLD2	0	1.25565	0.915	0.332	0	Fibroblast	CRISPLD2
NUPR1	0	1.25521	0.97	0.636	0	Fibroblast	NUPR1
ABCC9	0	1.23074	0.814	0.222	0	Fibroblast	ABCC9
PPIB	0	1.21034	0.954	0.788	0	Fibroblast	PPIB
CXCL12	0	1.19473	0.823	0.303	0	Fibroblast	CXCL12
CFH	0	1.19428	0.943	0.281	0	Fibroblast	CFH
CST3	0	1.18219	0.992	0.927	0	Fibroblast	CST3
MEDAG	0	1.18136	0.86	0.37	0	Fibroblast	MEDAG
CHI3L1	0	1.18095	0.198	0.011	0	Fibroblast	CHI3L1
USP53	0	1.17379	0.857	0.469	0	Fibroblast	USP53
AOX1	0	1.17099	0.752	0.095	0	Fibroblast	AOX1
IFITM3	0	1.1696	0.988	0.876	0	Fibroblast	IFITM3
FBLN5	0	1.1636	0.896	0.406	0	Fibroblast	FBLN5
LIMA1	0	1.1627	0.926	0.468	0	Fibroblast	LIMA1
GPC3	0	1.16233	0.665	0.043	0	Fibroblast	GPC3
ABCA6	0	1.15583	0.79	0.149	0	Fibroblast	ABCA6
TIMP3	0	1.14658	0.966	0.689	0	Fibroblast	TIMP3
PDGFRL	0	1.13792	0.759	0.118	0	Fibroblast	PDGFRL
NID1	0	1.13695	0.83	0.313	0	Fibroblast	NID1
EMP1	0	1.13303	0.949	0.44	0	Fibroblast	EMP1
PMP22	0	1.1317	0.951	0.6	0	Fibroblast	PMP22
GALNT15	0	1.12322	0.655	0.184	0	Fibroblast	GALNT15
TMEM45A	0	1.11951	0.783	0.174	0	Fibroblast	TMEM45A
HELLPAR	0	1.11464	0.635	0.054	0	Fibroblast	HELLPAR
F3	0	1.11099	0.677	0.152	0	Fibroblast	F3
SLPI	0	1.09942	0.44	0.034	0	Fibroblast	SLPI
CCN5	0	1.09536	0.899	0.539	0	Fibroblast	CCN5
THBS2	0	1.08428	0.799	0.261	0	Fibroblast	THBS2
ANGPTL2	0	1.08176	0.716	0.172	0	Fibroblast	ANGPTL2
ABCA9	0	1.06102	0.653	0.081	0	Fibroblast	ABCA9
RND3	0	1.05586	0.902	0.543	0	Fibroblast	RND3
RPLP0	0	1.05506	0.988	0.949	0	Fibroblast	RPLP0
PLIN21	0	1.05255	0.902	0.541	0	Fibroblast	PLIN2
BICC1	0	1.05067	0.79	0.164	0	Fibroblast	BICC1
LEPR	0	1.04829	0.58	0.126	0	Fibroblast	LEPR
REV3L	0	1.04412	0.863	0.482	0	Fibroblast	REV3L
LY6E	0	1.03878	0.856	0.273	0	Fibroblast	LY6E
SERPINE2	0	1.03823	0.522	0.116	0	Fibroblast	SERPINE2
LOX	0	1.03691	0.746	0.194	0	Fibroblast	LOX
TWIST2	0	1.03026	0.751	0.104	0	Fibroblast	TWIST2
MT1X	0	1.02546	0.931	0.709	0	Fibroblast	MT1X
CD248	0	1.02501	0.7	0.092	0	Fibroblast	CD248
TNXB	0	1.01664	0.733	0.23	0	Fibroblast	TNXB
MT1A	0	1.01279	0.586	0.21	0	Fibroblast	MT1A
LRP1	0	1.01112	0.964	0.691	0	Fibroblast	LRP1
PTGFR	0	1.00781	0.679	0.054	0	Fibroblast	PTGFR
LHFPL6	0	1.00373	0.905	0.532	0	Fibroblast	LHFPL6
CYP4B1	0	0.998337	0.464	0.041	0	Fibroblast	CYP4B1
RHOBTB3	0	0.997215	0.836	0.331	0	Fibroblast	RHOBTB3
MSX1	0	0.98401	0.738	0.112	0	Fibroblast	MSX1
CYBRD1	0	0.9821	0.934	0.58	0	Fibroblast	CYBRD1
AKR1C3	0	0.97778	0.663	0.197	0	Fibroblast	AKR1C3
HTRA3	0	0.973039	0.604	0.046	0	Fibroblast	HTRA3
PROCR	0	0.971126	0.741	0.191	0	Fibroblast	PROCR
ADD3	0	0.969873	0.845	0.335	0	Fibroblast	ADD3
ALDH1A1	0	0.965612	0.8	0.287	0	Fibroblast	ALDH1A1
PI16	0	0.963105	0.359	0.015	0	Fibroblast	PI16
EPHX1	0	0.960589	0.828	0.357	0	Fibroblast	EPHX1
ANK2	0	0.953924	0.731	0.159	0	Fibroblast	ANK2
RPL39	0	0.949809	0.992	0.97	0	Fibroblast	RPL39
DHRS3	0	0.947728	0.756	0.342	0	Fibroblast	DHRS3
DEPP1	0	0.94734	0.644	0.382	0	Fibroblast	DEPP1
NFIB	0	0.942557	0.945	0.597	0	Fibroblast	NFIB
SOX4	0	0.935551	0.779	0.394	0	Fibroblast	SOX4
ARID5B	0	0.933052	0.964	0.768	0	Fibroblast	ARID5B
IFITM2	0	0.929963	0.952	0.711	0	Fibroblast	IFITM2
HAS1	0	0.928804	0.329	0.024	0	Fibroblast	HAS1
ALKAL2	0	0.902778	0.322	0.133	0	Fibroblast	ALKAL2
LBP	0	0.901953	0.301	0.012	0	Fibroblast	LBP
CCN1	0	0.901241	0.891	0.578	0	Fibroblast	CCN1
LAPTM4A	0	0.891228	0.96	0.79	0	Fibroblast	LAPTM4A
LGALS3	0	0.887198	0.968	0.81	0	Fibroblast	LGALS3
CEBPD	0	0.883774	0.98	0.88	0	Fibroblast	CEBPD
TNFSF10	0	0.881436	0.718	0.167	0	Fibroblast	TNFSF10
CD63	0	0.87995	0.991	0.943	0	Fibroblast	CD63
EGFR	0	0.873628	0.78	0.307	0	Fibroblast	EGFR
GPNMB1	0	0.873359	0.874	0.521	0	Fibroblast	GPNMB
F10	0	0.872638	0.697	0.162	0	Fibroblast	F10
C1orf21	0	0.870913	0.817	0.238	0	Fibroblast	C1orf21
SPON1	0	0.868135	0.627	0.09	0	Fibroblast	SPON1
TMEM119	0	0.867199	0.576	0.072	0	Fibroblast	TMEM119
ABLIM1	0	0.865938	0.745	0.169	0	Fibroblast	ABLIM1
SAMHD1	0	0.860831	0.872	0.443	0	Fibroblast	SAMHD1
METTL7A	0	0.857156	0.897	0.497	0	Fibroblast	METTL7A
STEAP4	0	0.852953	0.577	0.105	0	Fibroblast	STEAP4
TSHZ2	0	0.837376	0.765	0.15	0	Fibroblast	TSHZ2
CD81	0	0.836488	0.972	0.882	0	Fibroblast	CD81
SSR4	0	0.834849	0.933	0.764	0	Fibroblast	SSR4
PDPN	0	0.833463	0.522	0.026	0	Fibroblast	PDPN
MYCBP2	0	0.831297	0.887	0.638	0	Fibroblast	MYCBP2
GSTM3	0	0.830298	0.803	0.352	0	Fibroblast	GSTM3
RPL28	0	0.820394	0.991	0.968	0	Fibroblast	RPL28
TGFBR2	0	0.814414	0.907	0.583	0	Fibroblast	TGFBR2
RRBP1	0	0.813423	0.917	0.647	0	Fibroblast	RRBP1
MPZL1	0	0.811716	0.819	0.35	0	Fibroblast	MPZL1
APOC1	0	0.810455	0.399	0.095	0	Fibroblast	APOC1
CYGB	0	0.809205	0.635	0.118	0	Fibroblast	CYGB
RPL12	0	0.808714	0.993	0.971	0	Fibroblast	RPL12
LGALS3BP	0	0.80774	0.749	0.301	0	Fibroblast	LGALS3BP
GDF15	0	0.803265	0.27	0.052	0	Fibroblast	GDF15
SMIM14	0	0.803001	0.876	0.526	0	Fibroblast	SMIM14
TSKU	0	0.797911	0.52	0.099	0	Fibroblast	TSKU
FSTL3	0	0.791727	0.755	0.325	0	Fibroblast	FSTL3
AKR1C2	0	0.785752	0.61	0.131	0	Fibroblast	AKR1C2
OAF	0	0.78549	0.647	0.104	0	Fibroblast	OAF
GFPT2	0	0.784796	0.637	0.096	0	Fibroblast	GFPT2
COL5A2	0	0.78407	0.754	0.349	0	Fibroblast	COL5A2
NPY1R	0	0.779993	0.491	0.189	0	Fibroblast	NPY1R
MRC2	0	0.775053	0.726	0.179	0	Fibroblast	MRC2
GGT5	0	0.774833	0.728	0.264	0	Fibroblast	GGT5
MIR99AHG	0	0.774661	0.69	0.212	0	Fibroblast	MIR99AHG
DDR2	0	0.774654	0.851	0.445	0	Fibroblast	DDR2
TWIST1	0	0.772992	0.541	0.147	0	Fibroblast	TWIST1
RPS9	0	0.772838	0.988	0.976	0	Fibroblast	RPS9
SH3D19	0	0.770046	0.816	0.37	0	Fibroblast	SH3D19
CLEC11A	0	0.767474	0.682	0.172	0	Fibroblast	CLEC11A
FYN	0	0.764353	0.812	0.23	0	Fibroblast	FYN
RNASE4	0	0.758756	0.837	0.479	0	Fibroblast	RNASE4
RPL18A	0	0.757921	0.993	0.977	0	Fibroblast	RPL18A
RPS2	0	0.755777	0.994	0.982	0	Fibroblast	RPS2
VCAN	0	0.755253	0.927	0.47	0	Fibroblast	VCAN
CYB5A	0	0.753923	0.782	0.398	0	Fibroblast	CYB5A
HAS2	0	0.753083	0.431	0.055	0	Fibroblast	HAS2
LAMC1	0	0.751353	0.862	0.518	0	Fibroblast	LAMC1
PCOLCE2	0	0.750485	0.655	0.207	0	Fibroblast	PCOLCE2
MFAP4	0	0.750126	0.831	0.408	0	Fibroblast	MFAP4
PDGFD	0	0.748637	0.613	0.124	0	Fibroblast	PDGFD
TSPAN8	0	0.74399	0.487	0.207	0	Fibroblast	TSPAN8
RPL29	0	0.740515	0.987	0.961	0	Fibroblast	RPL29
KLF9	0	0.737989	0.947	0.745	0	Fibroblast	KLF9
TXNIP	0	0.736246	0.873	0.607	0	Fibroblast	TXNIP
GEM	0	0.735008	0.758	0.451	0	Fibroblast	GEM
ECM1	0	0.727765	0.686	0.198	0	Fibroblast	ECM1
LAMB1	0	0.727126	0.709	0.205	0	Fibroblast	LAMB1
TSPAN4	0	0.724572	0.827	0.394	0	Fibroblast	TSPAN4
GPRC5A	0	0.724198	0.811	0.424	0	Fibroblast	GPRC5A
ELN	0	0.723947	0.777	0.481	0	Fibroblast	ELN
RPS18	0	0.720928	0.996	0.988	0	Fibroblast	RPS18
ANXA2	0	0.720782	0.967	0.87	0	Fibroblast	ANXA2
AEBP1	0	0.720763	0.949	0.594	0	Fibroblast	AEBP1
DIO3OS	0	0.718793	0.602	0.046	0	Fibroblast	DIO3OS
OSR2	0	0.718306	0.51	0.067	0	Fibroblast	OSR2
HTRA1	0	0.71652	0.887	0.59	0	Fibroblast	HTRA1
LPAR1	0	0.715575	0.767	0.281	0	Fibroblast	LPAR1
PID1	0	0.713599	0.702	0.206	0	Fibroblast	PID1
PKDCC	0	0.711847	0.682	0.229	0	Fibroblast	PKDCC
PIM1	0	0.710753	0.715	0.327	0	Fibroblast	PIM1
FGFR1	0	0.708062	0.922	0.627	0	Fibroblast	FGFR1
COL5A1	0	0.707524	0.681	0.257	0	Fibroblast	COL5A1
SPARC	0	0.706329	0.939	0.726	0	Fibroblast	SPARC
PRDX4	0	0.703687	0.802	0.433	0	Fibroblast	PRDX4
MEG8	0	0.701292	0.535	0.097	0	Fibroblast	MEG8
NBL1	0	0.700526	0.86	0.508	0	Fibroblast	NBL1
TXNRD1	0	0.698872	0.803	0.525	0	Fibroblast	TXNRD1
KDELR1	0	0.697696	0.903	0.644	0	Fibroblast	KDELR1
CCNL1	0	0.695528	0.953	0.863	0	Fibroblast	CCNL1
CBLB	0	0.694617	0.695	0.239	0	Fibroblast	CBLB
CTSF	0	0.693022	0.773	0.393	0	Fibroblast	CTSF
RNF19A	0	0.692255	0.857	0.547	0	Fibroblast	RNF19A
RPS5	0	0.69142	0.976	0.937	0	Fibroblast	RPS5
CFB	0	0.691387	0.61	0.182	0	Fibroblast	CFB
SH3BP5	0	0.690039	0.879	0.547	0	Fibroblast	SH3BP5
PRDX6	0	0.686889	0.92	0.726	0	Fibroblast	PRDX6
RACK1	0	0.684478	0.986	0.953	0	Fibroblast	RACK1
S100A101	0	0.683579	0.968	0.723	0	Fibroblast	S100A10
ITM2B	0	0.680817	0.988	0.944	0	Fibroblast	ITM2B
RPS8	0	0.679223	0.993	0.981	0	Fibroblast	RPS8
SMAD3	0	0.677422	0.717	0.254	0	Fibroblast	SMAD3
MIF	0	0.675762	0.945	0.828	0	Fibroblast	MIF
CTSA	0	0.673859	0.788	0.437	0	Fibroblast	CTSA
ID3	0	0.670544	0.875	0.685	0	Fibroblast	ID3
MYC	0	0.667694	0.79	0.385	0	Fibroblast	MYC
NME2	0	0.66738	0.964	0.879	0	Fibroblast	NME2
SPRY1	0	0.667235	0.716	0.289	0	Fibroblast	SPRY1
PCDH18	0	0.66539	0.617	0.148	0	Fibroblast	PCDH18
CP	0	0.664348	0.352	0.058	0	Fibroblast	CP
ISLR	0	0.663719	0.755	0.298	0	Fibroblast	ISLR
IL6	0	0.658723	0.541	0.148	0	Fibroblast	IL6
LRRN4CL	0	0.658155	0.524	0.021	0	Fibroblast	LRRN4CL
PPA1	0	0.65754	0.864	0.531	0	Fibroblast	PPA1
GLRX	0	0.657505	0.771	0.451	0	Fibroblast	GLRX
VKORC1	0	0.656089	0.856	0.554	0	Fibroblast	VKORC1
HILPDA	0	0.655671	0.489	0.216	0	Fibroblast	HILPDA
ADGRD1	0	0.652091	0.483	0.04	0	Fibroblast	ADGRD1
MMP23B	0	0.650084	0.475	0.096	0	Fibroblast	MMP23B
PRRX2	0	0.649832	0.714	0.284	0	Fibroblast	PRRX2
IFI16	0	0.649389	0.931	0.673	0	Fibroblast	IFI16
RPL13	0	0.646878	0.999	0.994	0	Fibroblast	RPL13
POLR2L	0	0.643756	0.92	0.729	0	Fibroblast	POLR2L
OGN	0	0.643604	0.819	0.431	0	Fibroblast	OGN
DIO3	0	0.643445	0.293	0.015	0	Fibroblast	DIO3
IRF1	0	0.642643	0.855	0.627	0	Fibroblast	IRF1
GPX8	0	0.6396	0.714	0.234	0	Fibroblast	GPX8
SH3PXD2B	0	0.639294	0.643	0.212	0	Fibroblast	SH3PXD2B
LMO3	0	0.636861	0.496	0.087	0	Fibroblast	LMO3
PCSK1	0	0.636718	0.326	0.045	0	Fibroblast	PCSK1
ANGPTL1	0	0.636517	0.783	0.421	0	Fibroblast	ANGPTL1
SLC39A14	0	0.634077	0.691	0.282	0	Fibroblast	SLC39A14
P4HB	0	0.633995	0.904	0.736	0	Fibroblast	P4HB
CCDC102B	0	0.632659	0.508	0.128	0	Fibroblast	CCDC102B
CDKN1C	0	0.632268	0.759	0.43	0	Fibroblast	CDKN1C
RPS12	0	0.631615	0.996	0.985	0	Fibroblast	RPS12
NID2	0	0.631252	0.538	0.083	0	Fibroblast	NID2
SOD21	0	0.628987	0.983	0.868	0	Fibroblast	SOD2
ACKR3	0	0.628464	0.619	0.335	0	Fibroblast	ACKR3
NCOA7	0	0.628443	0.806	0.358	0	Fibroblast	NCOA7
LMAN1	0	0.628137	0.863	0.569	0	Fibroblast	LMAN1
UGDH	0	0.627708	0.677	0.292	0	Fibroblast	UGDH
TENT5A	0	0.626652	0.773	0.443	0	Fibroblast	TENT5A
ABCA10	0	0.626566	0.378	0.022	0	Fibroblast	ABCA10
RAMP2	0	0.623021	0.576	0.109	0	Fibroblast	RAMP2
HSP90B1	0	0.62236	0.944	0.844	0	Fibroblast	HSP90B1
CES1	0	0.622078	0.54	0.233	0	Fibroblast	CES1
RCN3	0	0.617708	0.711	0.252	0	Fibroblast	RCN3
GLUL1	0	0.617312	0.913	0.742	0	Fibroblast	GLUL
PLK2	0	0.614608	0.583	0.269	0	Fibroblast	PLK2
FAXDC2	0	0.613984	0.562	0.175	0	Fibroblast	FAXDC2
STEAP1	0	0.611387	0.547	0.084	0	Fibroblast	STEAP1
SHOX2	0	0.608474	0.649	0.219	0	Fibroblast	SHOX2
CLMP	0	0.606825	0.614	0.087	0	Fibroblast	CLMP
MMP14	0	0.606636	0.667	0.292	0	Fibroblast	MMP14
RPS15	0	0.605924	0.99	0.975	0	Fibroblast	RPS15
RUNX11	0	0.60464	0.722	0.338	0	Fibroblast	RUNX1
NEGR1	0	0.600089	0.627	0.201	0	Fibroblast	NEGR1
PDIA6	0	0.599152	0.855	0.647	0	Fibroblast	PDIA6
GAS5	0	0.592194	0.938	0.786	0	Fibroblast	GAS5
HP	0	0.591043	0.168	0.007	0	Fibroblast	HP
MT1G	0	0.590174	0.227	0.048	0	Fibroblast	MT1G
FUNDC2	0	0.589691	0.808	0.486	0	Fibroblast	FUNDC2
DPP7	0	0.588804	0.817	0.405	0	Fibroblast	DPP7
RPL13A	0	0.585453	0.995	0.985	0	Fibroblast	RPL13A
FRMD6	0	0.582855	0.564	0.179	0	Fibroblast	FRMD6
ATP6V0E1	0	0.580531	0.939	0.775	0	Fibroblast	ATP6V0E1
C12orf57	0	0.579915	0.94	0.705	0	Fibroblast	C12orf57
NFIL3	0	0.579508	0.863	0.618	0	Fibroblast	NFIL3
SLC19A2	0	0.57929	0.57	0.171	0	Fibroblast	SLC19A2
FKBP10	0	0.579118	0.747	0.281	0	Fibroblast	FKBP10
SSR2	0	0.578074	0.905	0.694	0	Fibroblast	SSR2
MESD	0	0.576551	0.794	0.441	0	Fibroblast	MESD
SNHG29	0	0.575164	0.959	0.859	0	Fibroblast	SNHG29
PIK3R1	0	0.57477	0.877	0.624	0	Fibroblast	PIK3R1
CD99	0	0.571178	0.961	0.85	0	Fibroblast	CD99
NTRK2	0	0.570931	0.778	0.436	0	Fibroblast	NTRK2
RPL10A	0	0.568291	0.989	0.964	0	Fibroblast	RPL10A
KDELR2	0	0.568197	0.851	0.565	0	Fibroblast	KDELR2
TMEM258	0	0.568071	0.912	0.701	0	Fibroblast	TMEM258
NFIX	0	0.567321	0.89	0.541	0	Fibroblast	NFIX
VEGFA1	0	0.565611	0.722	0.379	0	Fibroblast	VEGFA
GPX4	0	0.565205	0.954	0.853	0	Fibroblast	GPX4
LAMA4	0	0.565064	0.691	0.31	0	Fibroblast	LAMA4
KCNQ1OT1	0	0.560969	0.625	0.318	0	Fibroblast	KCNQ1OT1
XG	0	0.560937	0.541	0.083	0	Fibroblast	XG
RPSA	0	0.560836	0.966	0.923	0	Fibroblast	RPSA
PRDX5	0	0.555092	0.886	0.644	0	Fibroblast	PRDX5
PDIA3	0	0.553345	0.92	0.769	0	Fibroblast	PDIA3
COPZ2	0	0.551585	0.754	0.373	0	Fibroblast	COPZ2
FST	0	0.550955	0.387	0.065	0	Fibroblast	FST
REXO2	0	0.550825	0.844	0.528	0	Fibroblast	REXO2
DAB21	0	0.550119	0.893	0.48	0	Fibroblast	DAB2
TFPI	0	0.549976	0.912	0.539	0	Fibroblast	TFPI
RCN1	0	0.54842	0.81	0.458	0	Fibroblast	RCN1
ADAMTS5	0	0.547084	0.358	0.077	0	Fibroblast	ADAMTS5
SNAI2	0	0.546943	0.526	0.127	0	Fibroblast	SNAI2
RPL10	0	0.54545	0.999	0.995	0	Fibroblast	RPL10
RPS4X	0	0.544371	0.991	0.98	0	Fibroblast	RPS4X
PTGIS	0	0.542684	0.819	0.482	0	Fibroblast	PTGIS
CHL1	0	0.542008	0.338	0.004	0	Fibroblast	CHL1
PLXDC2	0	0.541745	0.849	0.584	0	Fibroblast	PLXDC2
RPL11	0	0.540841	0.995	0.987	0	Fibroblast	RPL11
SERPINA5	0	0.53905	0.391	0.014	0	Fibroblast	SERPINA5
IL6ST	0	0.537989	0.935	0.729	0	Fibroblast	IL6ST
PGRMC2	0	0.537815	0.808	0.448	0	Fibroblast	PGRMC2
RPL22L1	0	0.536073	0.819	0.519	0	Fibroblast	RPL22L1
PALM	0	0.533222	0.585	0.098	0	Fibroblast	PALM
ERRFI1	0	0.533166	0.789	0.469	0	Fibroblast	ERRFI1
FKBP11	0	0.532876	0.621	0.203	0	Fibroblast	FKBP11
TNNT3	0	0.532577	0.331	0.031	0	Fibroblast	TNNT3
CERCAM	0	0.532036	0.617	0.196	0	Fibroblast	CERCAM
DLC1	0	0.52871	0.763	0.385	0	Fibroblast	DLC1
IRX3	0	0.528304	0.433	0.055	0	Fibroblast	IRX3
KRT10	0	0.527198	0.85	0.56	0	Fibroblast	KRT10
ZFHX4	0	0.526877	0.5	0.085	0	Fibroblast	ZFHX4
ABL1	0	0.526645	0.694	0.339	0	Fibroblast	ABL1
EPB41L2	0	0.526195	0.802	0.496	0	Fibroblast	EPB41L2
EMILIN1	0	0.524018	0.788	0.419	0	Fibroblast	EMILIN1
TMEM59	0	0.523678	0.936	0.776	0	Fibroblast	TMEM59
EFEMP2	0	0.523528	0.739	0.363	0	Fibroblast	EFEMP2
MFAP2	0	0.523092	0.555	0.126	0	Fibroblast	MFAP2
CNN3	0	0.521673	0.857	0.511	0	Fibroblast	CNN3
NDN	0	0.519122	0.761	0.346	0	Fibroblast	NDN
ARL6IP5	0	0.518422	0.949	0.801	0	Fibroblast	ARL6IP5
SRPX2	0	0.518296	0.534	0.085	0	Fibroblast	SRPX2
DPYSL2	0	0.518065	0.873	0.596	0	Fibroblast	DPYSL2
ZNF503	0	0.517937	0.622	0.292	0	Fibroblast	ZNF503
ST3GAL5	0	0.517527	0.496	0.107	0	Fibroblast	ST3GAL5
BIN1	0	0.517018	0.657	0.202	0	Fibroblast	BIN1
BASP11	0	0.516716	0.668	0.419	0	Fibroblast	BASP1
P4HA2	0	0.514626	0.669	0.298	0	Fibroblast	P4HA2
PTGES	0	0.514272	0.437	0.024	0	Fibroblast	PTGES
CHI3L2	0	0.511699	0.207	0.029	0	Fibroblast	CHI3L2
LTBP4	0	0.503434	0.749	0.376	0	Fibroblast	LTBP4
BOC	0	0.502649	0.515	0.088	0	Fibroblast	BOC
SPSB1	0	0.50264	0.62	0.273	0	Fibroblast	SPSB1
C1orf122	0	0.502472	0.773	0.508	0	Fibroblast	C1orf122
TAX1BP3	0	0.501821	0.765	0.446	0	Fibroblast	TAX1BP3
ATRAID	0	0.50011	0.842	0.56	0	Fibroblast	ATRAID
IER5L	1.31456e-277	0.54409	0.806	0.606	4.04031e-273	Fibroblast	IER5L
GADD45A	7.37093e-244	0.625773	0.808	0.663	2.26546e-239	Fibroblast	GADD45A
GAS6	9.24785e-214	0.544395	0.832	0.645	2.84233e-209	Fibroblast	GAS6
COMP	0	3.36468	0.74	0.252	0	Activated Fibroblast	COMP
TIMP1	0	2.73403	0.983	0.913	0	Activated Fibroblast	TIMP1
FN1	0	2.44684	0.997	0.799	0	Activated Fibroblast	FN1
PRELP	0	2.211	0.954	0.641	0	Activated Fibroblast	PRELP
COL1A11	0	2.18227	0.873	0.663	0	Activated Fibroblast	COL1A1
CFH1	0	2.11458	0.967	0.426	0	Activated Fibroblast	CFH
LUM1	0	2.11186	0.949	0.422	0	Activated Fibroblast	LUM
COL3A11	0	1.93009	0.91	0.727	0	Activated Fibroblast	COL3A1
LTBP2	0	1.9204	0.947	0.413	0	Activated Fibroblast	LTBP2
MGP1	0	1.87288	0.999	0.938	0	Activated Fibroblast	MGP
COL1A21	0	1.8628	0.954	0.779	0	Activated Fibroblast	COL1A2
SERPINE1	0	1.76131	0.801	0.375	0	Activated Fibroblast	SERPINE1
POSTN	0	1.75817	0.46	0.143	0	Activated Fibroblast	POSTN
BGN	0	1.6577	0.984	0.714	0	Activated Fibroblast	BGN
VCAN1	0	1.45928	0.977	0.567	0	Activated Fibroblast	VCAN
CRLF1	0	1.42213	0.731	0.337	0	Activated Fibroblast	CRLF1
NDUFA4L2	0	1.41442	0.694	0.196	0	Activated Fibroblast	NDUFA4L2
PCOLCE21	0	1.36536	0.845	0.287	0	Activated Fibroblast	PCOLCE2
AEBP11	0	1.34986	0.977	0.67	0	Activated Fibroblast	AEBP1
CRTAC1	0	1.33967	0.361	0.035	0	Activated Fibroblast	CRTAC1
F2R	0	1.33786	0.721	0.107	0	Activated Fibroblast	F2R
COL6A31	0	1.31463	0.873	0.478	0	Activated Fibroblast	COL6A3
COL5A21	0	1.27861	0.837	0.431	0	Activated Fibroblast	COL5A2
SPARC1	0	1.27212	0.962	0.771	0	Activated Fibroblast	SPARC
CCN2	0	1.26931	0.86	0.579	0	Activated Fibroblast	CCN2
LTBP11	0	1.24902	0.916	0.537	0	Activated Fibroblast	LTBP1
OMD	0	1.23918	0.794	0.252	0	Activated Fibroblast	OMD
CD9	0	1.21732	0.947	0.668	0	Activated Fibroblast	CD9
COL6A11	0	1.21359	0.961	0.741	0	Activated Fibroblast	COL6A1
COL14A11	0	1.19964	0.955	0.64	0	Activated Fibroblast	COL14A1
GPM6B	0	1.19079	0.664	0.088	0	Activated Fibroblast	GPM6B
UACA	0	1.18312	0.915	0.583	0	Activated Fibroblast	UACA
MXRA81	0	1.1345	0.912	0.472	0	Activated Fibroblast	MXRA8
OGN1	0	1.10942	0.893	0.51	0	Activated Fibroblast	OGN
IGFBP61	0	1.10469	0.952	0.661	0	Activated Fibroblast	IGFBP6
ITGBL1	0	1.07076	0.85	0.422	0	Activated Fibroblast	ITGBL1
S100A131	0	1.03175	0.933	0.626	0	Activated Fibroblast	S100A13
MEG31	0	0.985465	0.788	0.322	0	Activated Fibroblast	MEG3
ITGA10	0	0.965171	0.614	0.117	0	Activated Fibroblast	ITGA10
MYO1D	0	0.956075	0.869	0.408	0	Activated Fibroblast	MYO1D
COL5A11	0	0.926439	0.677	0.351	0	Activated Fibroblast	COL5A1
HTRA11	0	0.919672	0.915	0.653	0	Activated Fibroblast	HTRA1
NBL11	0	0.917602	0.869	0.585	0	Activated Fibroblast	NBL1
SULF1	0	0.909996	0.735	0.274	0	Activated Fibroblast	SULF1
TFPI2	0	0.880424	0.463	0.094	0	Activated Fibroblast	TFPI2
ASPN	0	0.871916	0.721	0.307	0	Activated Fibroblast	ASPN
PLXDC21	0	0.864864	0.915	0.636	0	Activated Fibroblast	PLXDC2
RCN31	0	0.847788	0.737	0.352	0	Activated Fibroblast	RCN3
DKK31	0	0.841277	0.764	0.337	0	Activated Fibroblast	DKK3
DPT1	0	0.837549	0.737	0.268	0	Activated Fibroblast	DPT
VIM1	0	0.822576	1	0.997	0	Activated Fibroblast	VIM
FKBP101	0	0.819017	0.739	0.385	0	Activated Fibroblast	FKBP10
FAP	0	0.806875	0.707	0.212	0	Activated Fibroblast	FAP
SERPINE21	0	0.803999	0.576	0.201	0	Activated Fibroblast	SERPINE2
PDGFRB	0	0.792459	0.946	0.625	0	Activated Fibroblast	PDGFRB
LTBP41	0	0.77558	0.846	0.449	0	Activated Fibroblast	LTBP4
PDGFRA1	0	0.765854	0.826	0.335	0	Activated Fibroblast	PDGFRA
GSN1	0	0.763462	0.988	0.909	0	Activated Fibroblast	GSN
TIMP2	0	0.742484	0.977	0.865	0	Activated Fibroblast	TIMP2
S100A16	0	0.742403	0.729	0.419	0	Activated Fibroblast	S100A16
ISLR1	0	0.740794	0.8	0.396	0	Activated Fibroblast	ISLR
PLAGL1	0	0.732855	0.69	0.339	0	Activated Fibroblast	PLAGL1
CDH13	0	0.728046	0.734	0.287	0	Activated Fibroblast	CDH13
THBS21	0	0.727836	0.773	0.384	0	Activated Fibroblast	THBS2
EDIL31	0	0.711321	0.764	0.351	0	Activated Fibroblast	EDIL3
LAMA21	0	0.697892	0.791	0.333	0	Activated Fibroblast	LAMA2
CDH11	0	0.693115	0.73	0.3	0	Activated Fibroblast	CDH11
KCNT2	0	0.678655	0.517	0.076	0	Activated Fibroblast	KCNT2
ANKH	0	0.64574	0.752	0.421	0	Activated Fibroblast	ANKH
MIR100HG	0	0.631696	0.769	0.389	0	Activated Fibroblast	MIR100HG
COL21A1	0	0.629347	0.561	0.13	0	Activated Fibroblast	COL21A1
AGT	0	0.622456	0.461	0.162	0	Activated Fibroblast	AGT
FAM3C	0	0.609151	0.794	0.47	0	Activated Fibroblast	FAM3C
CDC42EP5	0	0.608581	0.746	0.306	0	Activated Fibroblast	CDC42EP5
FOXC21	0	0.605466	0.691	0.274	0	Activated Fibroblast	FOXC2
MAMDC2	0	0.599912	0.567	0.241	0	Activated Fibroblast	MAMDC2
MRC21	0	0.599735	0.71	0.302	0	Activated Fibroblast	MRC2
PGM2L1	0	0.595086	0.614	0.255	0	Activated Fibroblast	PGM2L1
FAM114A1	0	0.580074	0.794	0.486	0	Activated Fibroblast	FAM114A1
CMKLR1	0	0.57694	0.571	0.141	0	Activated Fibroblast	CMKLR1
KDELR3	0	0.558214	0.524	0.187	0	Activated Fibroblast	KDELR3
PHLDB1	0	0.551039	0.694	0.335	0	Activated Fibroblast	PHLDB1
ABI3BP1	0	0.550833	0.897	0.506	0	Activated Fibroblast	ABI3BP
MICAL2	0	0.535003	0.633	0.27	0	Activated Fibroblast	MICAL2
UNC5B	0	0.529524	0.487	0.061	0	Activated Fibroblast	UNC5B
ITGA11	0	0.521141	0.523	0.198	0	Activated Fibroblast	ITGA11
COL16A1	0	0.513678	0.629	0.267	0	Activated Fibroblast	COL16A1
LINC01088	1.98714e-307	0.638924	0.585	0.265	6.10748e-303	Activated Fibroblast	LINC01088
ACTG1	1.98565e-299	0.763634	0.991	0.981	6.10289e-295	Activated Fibroblast	ACTG1
LGALS1	1.20011e-298	0.916755	0.988	0.95	3.68853e-294	Activated Fibroblast	LGALS1
COL6A21	1.2644e-298	0.977228	0.983	0.788	3.88615e-294	Activated Fibroblast	COL6A2
LTBP3	4.02469e-297	0.574278	0.857	0.559	1.23699e-292	Activated Fibroblast	LTBP3
CNN31	2.00357e-296	0.574281	0.878	0.586	6.15797e-292	Activated Fibroblast	CNN3
FMOD	2.58295e-295	0.698069	0.793	0.482	7.93871e-291	Activated Fibroblast	FMOD
CYBRD11	5.46076e-285	0.651503	0.916	0.661	1.67836e-280	Activated Fibroblast	CYBRD1
PLOD2	5.9302e-280	0.521731	0.693	0.378	1.82265e-275	Activated Fibroblast	PLOD2
ANTXR1	1.28052e-275	0.69477	0.756	0.448	3.93569e-271	Activated Fibroblast	ANTXR1
TPPP3	1.96856e-275	0.592203	0.343	0.109	6.05037e-271	Activated Fibroblast	TPPP3
TNFAIP61	1.84995e-272	0.558172	0.674	0.308	5.68583e-268	Activated Fibroblast	TNFAIP6
SPTBN1	3.62579e-267	0.540431	0.923	0.657	1.11439e-262	Activated Fibroblast	SPTBN1
LOX1	5.74124e-263	0.529023	0.645	0.327	1.76457e-258	Activated Fibroblast	LOX
COL8A11	2.24364e-262	0.631929	0.775	0.396	6.89582e-258	Activated Fibroblast	COL8A1
ZNF704	6.18517e-262	0.546159	0.742	0.43	1.90101e-257	Activated Fibroblast	ZNF704
NFIC	9.10591e-262	0.526201	0.935	0.784	2.7987e-257	Activated Fibroblast	NFIC
S100A6	7.05437e-259	0.558605	0.998	0.992	2.16816e-254	Activated Fibroblast	S100A6
NUCB2	3.46642e-257	0.663909	0.799	0.556	1.0654e-252	Activated Fibroblast	NUCB2
SERPINA31	6.62008e-257	0.913791	0.609	0.289	2.03468e-252	Activated Fibroblast	SERPINA3
GGT51	2.95721e-254	0.656608	0.682	0.372	9.08898e-250	Activated Fibroblast	GGT5
ITGB5	1.54374e-251	0.530479	0.825	0.584	4.74468e-247	Activated Fibroblast	ITGB5
PDLIM31	9.1718e-251	0.644803	0.916	0.595	2.81895e-246	Activated Fibroblast	PDLIM3
FHL2	2.60519e-248	0.552722	0.532	0.263	8.00704e-244	Activated Fibroblast	FHL2
COL4A11	1.00522e-246	0.75286	0.925	0.683	3.08953e-242	Activated Fibroblast	COL4A1
COL15A1	2.87458e-245	0.581818	0.589	0.294	8.83502e-241	Activated Fibroblast	COL15A1
PPIB1	3.44254e-244	0.753758	0.94	0.826	1.05807e-239	Activated Fibroblast	PPIB
RPS26	2.1655e-240	0.544324	0.967	0.928	6.65565e-236	Activated Fibroblast	RPS26
IGFBP71	1.6243e-237	0.733598	0.994	0.895	4.99228e-233	Activated Fibroblast	IGFBP7
PRDX41	6.99042e-237	0.630415	0.755	0.52	2.14851e-232	Activated Fibroblast	PRDX4
EVA1B	2.31531e-235	0.512469	0.809	0.596	7.11612e-231	Activated Fibroblast	EVA1B
CREB3L2	7.98084e-234	0.506271	0.79	0.511	2.45291e-229	Activated Fibroblast	CREB3L2
COL4A21	3.53698e-233	0.653758	0.93	0.697	1.08709e-228	Activated Fibroblast	COL4A2
EPS8	1.54077e-232	0.515916	0.912	0.741	4.73556e-228	Activated Fibroblast	EPS8
PLP21	2.0307e-227	0.504984	0.887	0.688	6.24135e-223	Activated Fibroblast	PLP2
EFEMP11	1.07351e-224	0.503964	0.897	0.567	3.29944e-220	Activated Fibroblast	EFEMP1
GEM1	1.36996e-215	0.665819	0.799	0.516	4.21059e-211	Activated Fibroblast	GEM
KDELR21	2.3492e-215	0.587154	0.821	0.632	7.22026e-211	Activated Fibroblast	KDELR2
PRSS23	9.38181e-204	0.60654	0.785	0.516	2.8835e-199	Activated Fibroblast	PRSS23
RPS27L	1.5839e-202	0.530611	0.927	0.79	4.8681e-198	Activated Fibroblast	RPS27L
PCOLCE1	3.0645e-197	0.787134	0.673	0.415	9.41874e-193	Activated Fibroblast	PCOLCE
TENT5A1	1.16416e-194	0.644644	0.752	0.519	3.57806e-190	Activated Fibroblast	TENT5A
TNFRSF11B	2.27029e-176	1.48249	0.367	0.167	6.97772e-172	Activated Fibroblast	TNFRSF11B
PLS31	5.10135e-172	0.502306	0.918	0.661	1.5679e-167	Activated Fibroblast	PLS3
ELN1	1.80277e-169	0.599423	0.804	0.544	5.54081e-165	Activated Fibroblast	ELN
PMEPA11	9.46939e-166	0.743812	0.741	0.498	2.91042e-161	Activated Fibroblast	PMEPA1
MT2A1	1.07371e-165	0.673661	0.981	0.922	3.30004e-161	Activated Fibroblast	MT2A
F31	1.13646e-159	0.636033	0.529	0.284	3.49292e-155	Activated Fibroblast	F3
SERPINH1	1.30065e-156	0.628468	0.799	0.628	3.99756e-152	Activated Fibroblast	SERPINH1
PDGFA1	2.16696e-142	0.544279	0.594	0.356	6.66014e-138	Activated Fibroblast	PDGFA
RGS16	1.53677e-136	0.667993	0.661	0.431	4.72326e-132	Activated Fibroblast	RGS16
MT1E1	2.43589e-122	0.678502	0.807	0.638	7.4867e-118	Activated Fibroblast	MT1E
CCN11	1.92381e-118	0.588669	0.84	0.653	5.91283e-114	Activated Fibroblast	CCN1
TSC22D3	5.34423e-107	0.506021	0.907	0.814	1.64255e-102	Activated Fibroblast	TSC22D3
CRIP11	2.2435e-97	0.641288	0.91	0.781	6.8954e-93	Activated Fibroblast	CRIP1
P4HB1	2.8522e-84	0.551006	0.855	0.779	8.76623e-80	Activated Fibroblast	P4HB
CLU	2.57221e-83	1.44109	0.891	0.761	7.90567e-79	Activated Fibroblast	CLU
DDIT4	1.5488e-79	0.881629	0.792	0.728	4.76024e-75	Activated Fibroblast	DDIT4
CCL2	9.35779e-78	0.922167	0.613	0.446	2.87612e-73	Activated Fibroblast	CCL2
HILPDA1	9.75429e-58	0.668678	0.414	0.285	2.99798e-53	Activated Fibroblast	HILPDA
ANGPTL4	2.39686e-42	0.601974	0.387	0.272	7.36676e-38	Activated Fibroblast	ANGPTL4
IGFBP2	8.4533e-17	1.14622	0.401	0.37	2.59812e-12	Activated Fibroblast	IGFBP2
PRG41	4.91572e-11	0.796239	0.226	0.177	1.51085e-06	Activated Fibroblast	PRG4
IL7R	0	3.82	0.696	0.035	0	NK/T Cell	IL7R
CXCR41	0	3.71765	0.911	0.131	0	NK/T Cell	CXCR4
CCL5	0	3.69204	0.656	0.025	0	NK/T Cell	CCL5
GNLY	0	3.53364	0.298	0.009	0	NK/T Cell	GNLY
CD69	0	3.50816	0.794	0.024	0	NK/T Cell	CD69
NKG7	0	3.08877	0.479	0.014	0	NK/T Cell	NKG7
DUSP21	0	2.91749	0.821	0.156	0	NK/T Cell	DUSP2
PTPRC1	0	2.70403	0.933	0.176	0	NK/T Cell	PTPRC
IL32	0	2.64405	0.784	0.268	0	NK/T Cell	IL32
IFNG	0	2.52675	0.347	0.003	0	NK/T Cell	IFNG
CYTIP	0	2.37583	0.765	0.108	0	NK/T Cell	CYTIP
CD52	0	2.36803	0.675	0.046	0	NK/T Cell	CD52
BTG11	0	2.36279	0.977	0.883	0	NK/T Cell	BTG1
EZR1	0	2.24231	0.735	0.397	0	NK/T Cell	EZR
GZMB	0	2.2274	0.336	0.003	0	NK/T Cell	GZMB
CD2	0	2.20846	0.639	0.004	0	NK/T Cell	CD2
SYTL3	0	2.13962	0.683	0.048	0	NK/T Cell	SYTL3
CNOT6L	0	2.12988	0.765	0.365	0	NK/T Cell	CNOT6L
ARL4C1	0	2.12232	0.784	0.259	0	NK/T Cell	ARL4C
LTB	0	2.11375	0.451	0.013	0	NK/T Cell	LTB
TUBA4A	0	2.10856	0.597	0.254	0	NK/T Cell	TUBA4A
CST7	0	2.09955	0.541	0.01	0	NK/T Cell	CST7
RUNX3	0	2.0991	0.669	0.046	0	NK/T Cell	RUNX3
CLEC2B1	0	2.07654	0.749	0.433	0	NK/T Cell	CLEC2B
BCL11B	0	1.98594	0.607	0.007	0	NK/T Cell	BCL11B
XCL2	0	1.94876	0.191	0.002	0	NK/T Cell	XCL2
STK41	0	1.90511	0.8	0.366	0	NK/T Cell	STK4
RHOH	0	1.89938	0.602	0.014	0	NK/T Cell	RHOH
ETS1	0	1.89123	0.794	0.43	0	NK/T Cell	ETS1
HCST1	0	1.88583	0.71	0.144	0	NK/T Cell	HCST
KLRB1	0	1.87407	0.388	0.002	0	NK/T Cell	KLRB1
STK17A	0	1.86493	0.762	0.434	0	NK/T Cell	STK17A
STK17B1	0	1.85462	0.746	0.333	0	NK/T Cell	STK17B
ISG20	0	1.85394	0.632	0.165	0	NK/T Cell	ISG20
GZMA	0	1.84081	0.412	0.002	0	NK/T Cell	GZMA
CD48	0	1.81967	0.66	0.05	0	NK/T Cell	CD48
TRBC2	0	1.81618	0.561	0.005	0	NK/T Cell	TRBC2
XCL1	0	1.81593	0.185	0.001	0	NK/T Cell	XCL1
KLRD1	0	1.79178	0.302	0.018	0	NK/T Cell	KLRD1
CD7	0	1.78764	0.506	0.013	0	NK/T Cell	CD7
HSPA81	0	1.78049	0.948	0.876	0	NK/T Cell	HSPA8
AREG1	0	1.76612	0.447	0.109	0	NK/T Cell	AREG
PPP2R5C	0	1.76364	0.772	0.48	0	NK/T Cell	PPP2R5C
TRBC1	0	1.74742	0.442	0.004	0	NK/T Cell	TRBC1
CD3E	0	1.72641	0.581	0.003	0	NK/T Cell	CD3E
CDC42SE2	0	1.71764	0.678	0.243	0	NK/T Cell	CDC42SE2
IKZF1	0	1.7108	0.616	0.072	0	NK/T Cell	IKZF1
SRGN1	0	1.70551	0.945	0.458	0	NK/T Cell	SRGN
IL2RG	0	1.70536	0.612	0.022	0	NK/T Cell	IL2RG
CD3D	0	1.6886	0.526	0.003	0	NK/T Cell	CD3D
ZFP36L2	0	1.66135	0.938	0.855	0	NK/T Cell	ZFP36L2
GNG2	0	1.66062	0.577	0.121	0	NK/T Cell	GNG2
ACAP1	0	1.62838	0.605	0.065	0	NK/T Cell	ACAP1
CORO1A1	0	1.62718	0.61	0.122	0	NK/T Cell	CORO1A
CTSW	0	1.6191	0.412	0.004	0	NK/T Cell	CTSW
SMAP21	0	1.60546	0.705	0.319	0	NK/T Cell	SMAP2
SAMSN11	0	1.6027	0.604	0.123	0	NK/T Cell	SAMSN1
PCED1B-AS1	0	1.59922	0.564	0.069	0	NK/T Cell	PCED1B-AS1
ARHGDIB1	0	1.59024	0.782	0.424	0	NK/T Cell	ARHGDIB
LCP11	0	1.57806	0.751	0.186	0	NK/T Cell	LCP1
GPBP11	0	1.57277	0.848	0.751	0	NK/T Cell	GPBP1
RPS29	0	1.49648	0.99	0.973	0	NK/T Cell	RPS29
HLA-B1	0	1.47359	0.97	0.806	0	NK/T Cell	HLA-B
STAT4	0	1.44148	0.482	0.024	0	NK/T Cell	STAT4
DOK21	0	1.43961	0.527	0.116	0	NK/T Cell	DOK2
ITGA4	0	1.43427	0.487	0.129	0	NK/T Cell	ITGA4
CD371	0	1.43056	0.697	0.168	0	NK/T Cell	CD37
KLRK1	0	1.43011	0.35	0.009	0	NK/T Cell	KLRK1
CLEC2D	0	1.42465	0.477	0.065	0	NK/T Cell	CLEC2D
B2M1	0	1.41442	0.998	0.992	0	NK/T Cell	B2M
SPOCK2	0	1.40275	0.488	0.011	0	NK/T Cell	SPOCK2
GZMK	0	1.3936	0.279	0.003	0	NK/T Cell	GZMK
TAGAP1	0	1.38908	0.495	0.099	0	NK/T Cell	TAGAP
GZMH	0	1.35751	0.279	0.001	0	NK/T Cell	GZMH
TENT5C	0	1.35065	0.45	0.131	0	NK/T Cell	TENT5C
RPS19	0	1.33565	0.995	0.984	0	NK/T Cell	RPS19
RPS3	0	1.31311	0.989	0.973	0	NK/T Cell	RPS3
CD247	0	1.29762	0.399	0.004	0	NK/T Cell	CD247
FYB11	0	1.29631	0.56	0.152	0	NK/T Cell	FYB1
PRF1	0	1.29553	0.268	0.001	0	NK/T Cell	PRF1
PRDM11	0	1.28821	0.47	0.094	0	NK/T Cell	PRDM1
CD96	0	1.2606	0.436	0.006	0	NK/T Cell	CD96
GZMM	0	1.25962	0.393	0.004	0	NK/T Cell	GZMM
RAC2	0	1.24417	0.455	0.07	0	NK/T Cell	RAC2
ITK	0	1.23592	0.409	0.003	0	NK/T Cell	ITK
CD3G	0	1.23407	0.374	0.002	0	NK/T Cell	CD3G
TRAC	0	1.21982	0.425	0.101	0	NK/T Cell	TRAC
GPR65	0	1.21325	0.39	0.035	0	NK/T Cell	GPR65
BICDL1	0	1.2117	0.364	0.003	0	NK/T Cell	BICDL1
LIME1	0	1.21141	0.436	0.022	0	NK/T Cell	LIME1
PRKCQ-AS1	0	1.20581	0.371	0.004	0	NK/T Cell	PRKCQ-AS1
RPS27	0	1.19865	0.995	0.994	0	NK/T Cell	RPS27
CRYBG1	0	1.19526	0.436	0.1	0	NK/T Cell	CRYBG1
CASP8	0	1.16898	0.412	0.077	0	NK/T Cell	CASP8
RPS15A	0	1.15626	0.989	0.974	0	NK/T Cell	RPS15A
CD531	0	1.15605	0.564	0.15	0	NK/T Cell	CD53
BIN2	0	1.14981	0.417	0.076	0	NK/T Cell	BIN2
TNFSF14	0	1.10553	0.287	0.048	0	NK/T Cell	TNFSF14
SKAP1	0	1.07631	0.374	0.004	0	NK/T Cell	SKAP1
IKZF3	0	1.07546	0.329	0.005	0	NK/T Cell	IKZF3
HOPX	0	1.06751	0.301	0.03	0	NK/T Cell	HOPX
RPS27A	0	1.05705	0.993	0.99	0	NK/T Cell	RPS27A
LIMD2	0	1.05353	0.404	0.101	0	NK/T Cell	LIMD2
PTPN22	0	1.05086	0.35	0.035	0	NK/T Cell	PTPN22
SH2D1A	0	1.04294	0.324	0.002	0	NK/T Cell	SH2D1A
PYHIN1	0	1.02066	0.288	0.028	0	NK/T Cell	PYHIN1
ARAP2	0	1.01787	0.355	0.065	0	NK/T Cell	ARAP2
GBP5	0	1.01327	0.266	0.014	0	NK/T Cell	GBP5
PLAC8	0	1.00717	0.302	0.011	0	NK/T Cell	PLAC8
RPL30	0	1.00606	0.995	0.987	0	NK/T Cell	RPL30
P2RY10	0	0.986208	0.303	0.002	0	NK/T Cell	P2RY10
CD8A	0	0.97826	0.218	0.002	0	NK/T Cell	CD8A
RNF125	0	0.972421	0.369	0.078	0	NK/T Cell	RNF125
RPS21	0	0.968311	0.986	0.975	0	NK/T Cell	RPS21
PTPN7	0	0.955347	0.319	0.022	0	NK/T Cell	PTPN7
GPR171	0	0.942324	0.247	0.003	0	NK/T Cell	GPR171
TRGC2	0	0.905921	0.219	0.001	0	NK/T Cell	TRGC2
TNFRSF18	0	0.904257	0.24	0.006	0	NK/T Cell	TNFRSF18
CD28	0	0.899769	0.293	0.025	0	NK/T Cell	CD28
SAMD3	0	0.894081	0.279	0.003	0	NK/T Cell	SAMD3
RASGRP1	0	0.86526	0.295	0.007	0	NK/T Cell	RASGRP1
MATK	0	0.864317	0.275	0.007	0	NK/T Cell	MATK
IL2RB	0	0.851531	0.283	0.003	0	NK/T Cell	IL2RB
AC243960.1	0	0.850596	0.257	0.006	0	NK/T Cell	AC243960.1
TRAT1	0	0.834575	0.259	0.001	0	NK/T Cell	TRAT1
ARHGAP9	0	0.828072	0.279	0.043	0	NK/T Cell	ARHGAP9
GATA3	0	0.799481	0.26	0.009	0	NK/T Cell	GATA3
AC016074.2	0	0.796243	0.173	0.002	0	NK/T Cell	AC016074.2
ICOS	0	0.793793	0.196	0.001	0	NK/T Cell	ICOS
CCDC88C	0	0.792497	0.299	0.037	0	NK/T Cell	CCDC88C
LCK	0	0.777874	0.281	0.003	0	NK/T Cell	LCK
AC004687.1	0	0.771408	0.27	0.039	0	NK/T Cell	AC004687.1
TIGIT	0	0.766744	0.202	0.001	0	NK/T Cell	TIGIT
SH2D2A	0	0.717509	0.235	0.018	0	NK/T Cell	SH2D2A
CD8B	0	0.707925	0.153	0.004	0	NK/T Cell	CD8B
CD40LG	0	0.695028	0.171	0.001	0	NK/T Cell	CD40LG
ITGAL	0	0.692586	0.227	0.017	0	NK/T Cell	ITGAL
LINC01871	0	0.687726	0.202	0.001	0	NK/T Cell	LINC01871
KLRG1	0	0.687133	0.202	0.017	0	NK/T Cell	KLRG1
TBC1D10C	0	0.684767	0.24	0.007	0	NK/T Cell	TBC1D10C
SP140	0	0.672701	0.241	0.013	0	NK/T Cell	SP140
AC136475.3	0	0.667289	0.183	0.001	0	NK/T Cell	AC136475.3
SLAMF1	0	0.646982	0.202	0.009	0	NK/T Cell	SLAMF1
TRAF3IP3	0	0.643782	0.213	0.013	0	NK/T Cell	TRAF3IP3
CD6	0	0.640751	0.227	0.004	0	NK/T Cell	CD6
TRG-AS1	0	0.639106	0.197	0.019	0	NK/T Cell	TRG-AS1
TXK	0	0.638683	0.167	0.005	0	NK/T Cell	TXK
ZNF831	0	0.637155	0.196	0.002	0	NK/T Cell	ZNF831
GPR174	0	0.632848	0.208	0.002	0	NK/T Cell	GPR174
S1PR4	0	0.628114	0.23	0.013	0	NK/T Cell	S1PR4
PBX4	0	0.622901	0.207	0.007	0	NK/T Cell	PBX4
SPN	0	0.599824	0.216	0.02	0	NK/T Cell	SPN
THEMIS	0	0.584516	0.17	0.001	0	NK/T Cell	THEMIS
IPCEF1	0	0.570425	0.178	0.011	0	NK/T Cell	IPCEF1
ZAP70	0	0.559696	0.184	0.002	0	NK/T Cell	ZAP70
LINC00861	0	0.536965	0.19	0.001	0	NK/T Cell	LINC00861
LAX1	0	0.535659	0.165	0.002	0	NK/T Cell	LAX1
SLFN12L	0	0.535336	0.157	0.006	0	NK/T Cell	SLFN12L
CD226	0	0.52224	0.161	0.009	0	NK/T Cell	CD226
SCML4	0	0.510406	0.163	0.001	0	NK/T Cell	SCML4
TNFAIP31	1.5401e-301	1.35917	0.794	0.416	4.73351e-297	NK/T Cell	TNFAIP3
RBM39	2.42507e-299	1.10638	0.929	0.922	7.45345e-295	NK/T Cell	RBM39
RPS121	3.61226e-295	1.03156	0.995	0.988	1.11023e-290	NK/T Cell	RPS12
GPSM31	2.04697e-294	1.01239	0.466	0.139	6.29136e-290	NK/T Cell	GPSM3
RPL131	6.73028e-293	0.903407	0.999	0.995	2.06855e-288	NK/T Cell	RPL13
HSP90AA11	7.47272e-293	1.771	0.993	0.981	2.29674e-288	NK/T Cell	HSP90AA1
RPL281	1.89587e-292	1.04336	0.993	0.974	5.82697e-288	NK/T Cell	RPL28
CREM1	7.66575e-291	2.29136	0.73	0.49	2.35607e-286	NK/T Cell	CREM
HLA-A1	1.93913e-290	1.07595	0.969	0.928	5.95993e-286	NK/T Cell	HLA-A
RHOF	2.9905e-288	0.706358	0.277	0.049	9.19129e-284	NK/T Cell	RHOF
RIPOR2	3.02005e-286	0.860196	0.325	0.069	9.28211e-282	NK/T Cell	RIPOR2
RPS14	1.03813e-284	0.822162	0.994	0.987	3.1907e-280	NK/T Cell	RPS14
SRSF7	5.62565e-284	1.41794	0.882	0.813	1.72904e-279	NK/T Cell	SRSF7
RPL41	6.35012e-283	0.733086	0.996	0.997	1.95171e-278	NK/T Cell	RPL41
BATF	4.01346e-282	0.806729	0.212	0.029	1.23354e-277	NK/T Cell	BATF
GPRIN31	2.63486e-277	1.03326	0.376	0.094	8.09824e-273	NK/T Cell	GPRIN3
CCR7	3.72963e-277	0.786321	0.187	0.022	1.1463e-272	NK/T Cell	CCR7
AC044849.1	1.54731e-275	0.961881	0.338	0.079	4.75565e-271	NK/T Cell	AC044849.1
LINC-PINT1	4.58172e-272	1.54637	0.791	0.616	1.40819e-267	NK/T Cell	LINC-PINT
RGS11	5.21403e-271	1.40597	0.445	0.121	1.60253e-266	NK/T Cell	RGS1
HLA-C	9.10833e-271	1.06422	0.94	0.908	2.79945e-266	NK/T Cell	HLA-C
RPL21	2.90149e-266	0.811761	0.99	0.986	8.91774e-262	NK/T Cell	RPL21
RSRP1	1.15306e-265	1.27255	0.864	0.782	3.54394e-261	NK/T Cell	RSRP1
LEPROTL1	5.82034e-265	1.55113	0.619	0.339	1.78888e-260	NK/T Cell	LEPROTL1
JUND	1.97073e-263	1.13181	0.979	0.972	6.05704e-259	NK/T Cell	JUND
HSPE11	4.54539e-263	1.72717	0.893	0.855	1.39703e-258	NK/T Cell	HSPE1
FAU	1.75873e-256	0.686453	0.981	0.981	5.40547e-252	NK/T Cell	FAU
SEMA4D	7.17096e-256	0.77058	0.257	0.047	2.20399e-251	NK/T Cell	SEMA4D
PDE3B	5.39828e-255	0.773689	0.263	0.05	1.65916e-250	NK/T Cell	PDE3B
SLC38A11	1.57872e-254	1.26141	0.614	0.301	4.8522e-250	NK/T Cell	SLC38A1
REL1	8.00468e-253	1.56199	0.746	0.486	2.46024e-248	NK/T Cell	REL
RPS7	3.81138e-251	0.738337	0.985	0.975	1.17143e-246	NK/T Cell	RPS7
RPSA1	6.20898e-251	1.0446	0.966	0.934	1.90833e-246	NK/T Cell	RPSA
EMB1	9.53811e-250	0.885264	0.46	0.139	2.93154e-245	NK/T Cell	EMB
EVI2B1	1.4229e-249	0.98406	0.472	0.149	4.37329e-245	NK/T Cell	EVI2B
SARAF	6.82874e-245	1.31399	0.795	0.763	2.09881e-240	NK/T Cell	SARAF
FGFBP2	4.35151e-244	1.01172	0.16	0.018	1.33744e-239	NK/T Cell	FGFBP2
RPL17	1.44396e-242	0.743191	0.989	0.98	4.43802e-238	NK/T Cell	RPL17
DNAJA11	3.94646e-236	1.49266	0.892	0.836	1.21294e-231	NK/T Cell	DNAJA1
GMFG1	1.31371e-235	0.98468	0.51	0.186	4.03769e-231	NK/T Cell	GMFG
RPS151	9.33853e-235	0.779503	0.99	0.979	2.8702e-230	NK/T Cell	RPS15
RPS25	1.75556e-231	0.717155	0.99	0.983	5.3957e-227	NK/T Cell	RPS25
RPS181	5.83498e-231	0.818544	0.997	0.99	1.79338e-226	NK/T Cell	RPS18
ZC3H12D	1.78292e-230	0.572429	0.184	0.026	5.47982e-226	NK/T Cell	ZC3H12D
ICAM3	2.10927e-229	1.01891	0.41	0.139	6.48285e-225	NK/T Cell	ICAM3
RPS3A	2.5501e-229	0.763156	0.993	0.985	7.83774e-225	NK/T Cell	RPS3A
AC025164.1	1.3962e-227	0.987986	0.344	0.093	4.29123e-223	NK/T Cell	AC025164.1
RORA	3.46134e-225	1.5932	0.635	0.385	1.06384e-220	NK/T Cell	RORA
PMAIP11	2.92108e-224	1.43929	0.414	0.136	8.97793e-220	NK/T Cell	PMAIP1
SLA1	3.20913e-223	1.03573	0.407	0.125	9.86327e-219	NK/T Cell	SLA
EIF1	4.81496e-223	0.668065	0.99	0.991	1.47988e-218	NK/T Cell	EIF1
RPS28	1.04587e-222	0.688573	0.993	0.986	3.21449e-218	NK/T Cell	RPS28
CHD21	1.05026e-221	1.33605	0.77	0.65	3.22796e-217	NK/T Cell	CHD2
PARP8	1.43852e-221	1.14536	0.444	0.167	4.42129e-217	NK/T Cell	PARP8
RCAN3	2.5317e-219	0.884828	0.3	0.075	7.78117e-215	NK/T Cell	RCAN3
BIRC31	1.78024e-218	1.65048	0.626	0.319	5.47156e-214	NK/T Cell	BIRC3
RPL19	1.34737e-217	0.703076	0.991	0.986	4.14114e-213	NK/T Cell	RPL19
OXNAD1	1.59403e-217	0.71015	0.257	0.055	4.89925e-213	NK/T Cell	OXNAD1
AC008105.3	1.07601e-216	0.674323	0.249	0.051	3.30712e-212	NK/T Cell	AC008105.3
PTMA1	2.56729e-214	0.73032	0.996	0.994	7.89056e-210	NK/T Cell	PTMA
GIMAP7	5.20344e-213	0.840796	0.333	0.086	1.59928e-208	NK/T Cell	GIMAP7
CEMIP2	2.27634e-212	1.59671	0.602	0.342	6.99632e-208	NK/T Cell	CEMIP2
RPL23A	4.86253e-212	0.733324	0.978	0.98	1.4945e-207	NK/T Cell	RPL23A
PTGER4	5.56222e-212	1.39703	0.529	0.251	1.70955e-207	NK/T Cell	PTGER4
IL10RA1	5.79192e-211	1.01833	0.469	0.17	1.78015e-206	NK/T Cell	IL10RA
RPL3	7.0948e-211	0.705152	0.991	0.987	2.18059e-206	NK/T Cell	RPL3
HSP90AB11	2.45048e-210	1.408	0.971	0.973	7.53155e-206	NK/T Cell	HSP90AB1
HIST1H1D	9.29348e-210	1.22435	0.344	0.101	2.85635e-205	NK/T Cell	HIST1H1D
RPLP2	3.20204e-209	0.69062	0.985	0.981	9.84148e-205	NK/T Cell	RPLP2
ZC3HAV1	3.07353e-204	1.42743	0.65	0.43	9.44651e-200	NK/T Cell	ZC3HAV1
CDC14A	3.68501e-203	0.980713	0.356	0.113	1.13259e-198	NK/T Cell	CDC14A
CALM11	1.49896e-202	0.840413	0.961	0.955	4.60705e-198	NK/T Cell	CALM1
RPL34	2.38881e-202	0.69274	0.997	0.991	7.342e-198	NK/T Cell	RPL34
EEF1D	3.59856e-202	0.813451	0.938	0.919	1.10602e-197	NK/T Cell	EEF1D
LAT	2.75099e-200	0.578473	0.237	0.05	8.45515e-196	NK/T Cell	LAT
RPL26	1.92308e-198	0.609986	0.988	0.986	5.91059e-194	NK/T Cell	RPL26
PRKCH	1.669e-197	0.821697	0.333	0.097	5.12967e-193	NK/T Cell	PRKCH
H3F3B	2.94815e-197	0.871931	0.986	0.986	9.06113e-193	NK/T Cell	H3F3B
RPL111	3.88146e-197	0.685189	0.993	0.989	1.19297e-192	NK/T Cell	RPL11
IQGAP21	1.3934e-196	0.786398	0.455	0.154	4.28261e-192	NK/T Cell	IQGAP2
FYN1	1.57082e-196	1.22659	0.634	0.39	4.82791e-192	NK/T Cell	FYN
TPT1	1.87287e-196	0.689512	0.998	0.998	5.75628e-192	NK/T Cell	TPT1
AL499604.1	1.65537e-194	1.15779	0.379	0.129	5.08778e-190	NK/T Cell	AL499604.1
EEF1B2	5.95012e-194	0.889857	0.935	0.922	1.82877e-189	NK/T Cell	EEF1B2
HNRNPA2B1	2.99911e-192	0.779469	0.949	0.962	9.21778e-188	NK/T Cell	HNRNPA2B1
CACYBP1	5.40635e-191	1.5464	0.714	0.619	1.66164e-186	NK/T Cell	CACYBP
RPL27A	7.03145e-191	0.716009	0.977	0.978	2.16112e-186	NK/T Cell	RPL27A
ARHGAP15	7.79293e-191	0.827565	0.345	0.11	2.39516e-186	NK/T Cell	ARHGAP15
CCL41	1.9581e-188	1.47013	0.56	0.244	6.01821e-184	NK/T Cell	CCL4
RPL101	1.97254e-188	0.659471	0.996	0.996	6.06259e-184	NK/T Cell	RPL10
PIK3R11	1.89378e-187	1.5529	0.765	0.695	5.82055e-183	NK/T Cell	PIK3R1
FAM107B1	1.56269e-184	1.33609	0.665	0.427	4.80292e-180	NK/T Cell	FAM107B
LINC01138	3.72963e-183	0.631154	0.247	0.059	1.1463e-178	NK/T Cell	LINC01138
RPS22	1.41827e-182	0.732272	0.991	0.985	4.35904e-178	NK/T Cell	RPS2
HSPD11	9.05207e-180	1.5481	0.856	0.848	2.78215e-175	NK/T Cell	HSPD1
FMNL11	9.54052e-180	0.893316	0.414	0.157	2.93228e-175	NK/T Cell	FMNL1
RPL391	1.70585e-179	0.679896	0.988	0.976	5.24293e-175	NK/T Cell	RPL39
RBM38	2.16391e-179	0.900913	0.371	0.134	6.65077e-175	NK/T Cell	RBM38
RPL32	3.51427e-178	0.681589	0.99	0.988	1.08011e-173	NK/T Cell	RPL32
RPL35A	5.96661e-177	0.59434	0.988	0.981	1.83384e-172	NK/T Cell	RPL35A
RPL14	2.77309e-174	0.604512	0.986	0.981	8.52309e-170	NK/T Cell	RPL14
ELF11	5.08112e-172	1.3051	0.72	0.625	1.56168e-167	NK/T Cell	ELF1
AKNA	2.92227e-171	1.0338	0.382	0.146	8.9816e-167	NK/T Cell	AKNA
RPL18	3.61194e-170	0.683836	0.98	0.979	1.11013e-165	NK/T Cell	RPL18
OASL	1.53407e-168	0.701631	0.192	0.038	4.71496e-164	NK/T Cell	OASL
RPS4X1	1.9906e-163	0.686063	0.988	0.983	6.11809e-159	NK/T Cell	RPS4X
PPP1R2	1.99556e-163	1.35432	0.676	0.587	6.13337e-159	NK/T Cell	PPP1R2
EML4	2.21395e-162	1.27978	0.591	0.402	6.80458e-158	NK/T Cell	EML4
AC058791.1	1.03211e-160	1.18383	0.489	0.257	3.1722e-156	NK/T Cell	AC058791.1
RPS10	8.29759e-159	0.788157	0.875	0.875	2.55027e-154	NK/T Cell	RPS10
YWHAZ1	1.77435e-157	0.820997	0.859	0.886	5.45348e-153	NK/T Cell	YWHAZ
RPS6	2.75637e-157	0.663654	0.991	0.986	8.47169e-153	NK/T Cell	RPS6
TSC22D31	7.95876e-156	1.0937	0.852	0.821	2.44612e-151	NK/T Cell	TSC22D3
RPL37	8.85347e-156	0.574307	0.996	0.987	2.72111e-151	NK/T Cell	RPL37
ALOX5AP1	2.382e-155	0.764229	0.39	0.141	7.32107e-151	NK/T Cell	ALOX5AP
HNRNPA1	1.04445e-154	0.760902	0.846	0.874	3.21013e-150	NK/T Cell	HNRNPA1
NCL	2.34818e-152	0.931142	0.846	0.871	7.21713e-148	NK/T Cell	NCL
EIF4A2	2.21912e-151	0.794385	0.864	0.89	6.82046e-147	NK/T Cell	EIF4A2
RPS16	1.21692e-150	0.634161	0.985	0.978	3.7402e-146	NK/T Cell	RPS16
PIK3IP1	2.02812e-147	1.16305	0.503	0.287	6.23343e-143	NK/T Cell	PIK3IP1
PIM2	9.05018e-147	0.51246	0.185	0.04	2.78157e-142	NK/T Cell	PIM2
RPS23	2.56484e-146	0.526656	0.993	0.991	7.88304e-142	NK/T Cell	RPS23
RPL13A1	1.13842e-143	0.59793	0.988	0.988	3.49892e-139	NK/T Cell	RPL13A
[truncated: 1,407 more rows]

## Sheet: Data Set S2 (All EC Markers)
	p_val	avg_log2FC	pct.1	pct.2	p_val_adj	cluster	gene
ACKR1	2.64861e-182	2.87234	0.945	0.278	8.14051e-178	ACKR1+	ACKR1
PLVAP	7.14619e-127	1.82331	0.945	0.498	2.19638e-122	ACKR1+	PLVAP
ZNF385D	1.13926e-124	2.73868	0.787	0.253	3.50151e-120	ACKR1+	ZNF385D
AQP1	6.25589e-112	1.60966	0.975	0.654	1.92275e-107	ACKR1+	AQP1
CCL14	2.01272e-105	1.72179	0.937	0.592	6.18609e-101	ACKR1+	CCL14
RAMP3	5.7251e-82	1.49746	0.858	0.446	1.75961e-77	ACKR1+	RAMP3
NOSTRIN	6.49438e-79	1.72737	0.78	0.321	1.99605e-74	ACKR1+	NOSTRIN
RASA4	4.58114e-78	3.13455	0.527	0.114	1.40801e-73	ACKR1+	RASA4
SELE	2.44452e-75	2.89305	0.578	0.167	7.51322e-71	ACKR1+	SELE
VCAM1	8.75786e-75	2.22298	0.607	0.179	2.69173e-70	ACKR1+	VCAM1
MLPH	1.13044e-74	3.76327	0.448	0.071	3.4744e-70	ACKR1+	MLPH
VCAN	9.10845e-67	2.06324	0.63	0.225	2.79948e-62	ACKR1+	VCAN
TLL1	9.95614e-66	2.66507	0.529	0.145	3.06002e-61	ACKR1+	TLL1
LRRC1	5.68187e-62	1.95565	0.639	0.249	1.74632e-57	ACKR1+	LRRC1
OLFM1	7.29815e-62	1.75438	0.718	0.369	2.24309e-57	ACKR1+	OLFM1
GAS5	1.81848e-60	1.07416	0.901	0.762	5.5891e-56	ACKR1+	GAS5
DOCK11	8.52809e-58	3.59592	0.402	0.084	2.62111e-53	ACKR1+	DOCK11
RPS6	1.34806e-56	0.62839	0.989	0.971	4.14326e-52	ACKR1+	RPS6
TPD52L1	3.8065e-54	1.80573	0.618	0.274	1.16993e-49	ACKR1+	TPD52L1
COTL1	3.78922e-53	1.66294	0.644	0.293	1.16462e-48	ACKR1+	COTL1
IL6ST	3.88171e-53	1.11178	0.941	0.846	1.19304e-48	ACKR1+	IL6ST
LHX6	1.05189e-52	1.92032	0.542	0.197	3.23297e-48	ACKR1+	LHX6
POSTN	1.75132e-52	0.808501	0.79	0.391	5.38269e-48	ACKR1+	POSTN
ADAMTS9	6.98242e-50	1.49297	0.75	0.432	2.14605e-45	ACKR1+	ADAMTS9
DUSP23	2.03941e-49	1.26841	0.772	0.524	6.26813e-45	ACKR1+	DUSP23
COL15A1	2.59755e-49	0.910534	0.727	0.309	7.98358e-45	ACKR1+	COL15A1
TGFBR3	5.13594e-49	1.34091	0.79	0.498	1.57853e-44	ACKR1+	TGFBR3
PABPC1	9.45481e-49	0.761535	0.941	0.797	2.90593e-44	ACKR1+	PABPC1
ETS2	2.95081e-48	0.956364	0.881	0.727	9.0693e-44	ACKR1+	ETS2
CTSC	4.89512e-47	1.66085	0.646	0.325	1.50452e-42	ACKR1+	CTSC
ACTN1	2.78709e-46	0.810868	0.906	0.703	8.56612e-42	ACKR1+	ACTN1
PRCP	5.26416e-45	1.11845	0.787	0.516	1.61794e-40	ACKR1+	PRCP
SH3BGRL2	3.92289e-44	1.3819	0.684	0.374	1.2057e-39	ACKR1+	SH3BGRL2
TSHZ2	3.42663e-43	0.894523	0.837	0.483	1.05318e-38	ACKR1+	TSHZ2
PLCXD3	2.71227e-42	2.19434	0.45	0.148	8.33616e-38	ACKR1+	PLCXD3
HLA-DRA	3.53051e-42	1.02041	0.88	0.667	1.0851e-37	ACKR1+	HLA-DRA
ENG	2.92619e-41	0.860737	0.921	0.782	8.99363e-37	ACKR1+	ENG
SLC2A3	4.85052e-41	0.778737	0.918	0.663	1.49081e-36	ACKR1+	SLC2A3
FZD4	5.14691e-41	1.41283	0.7	0.42	1.5819e-36	ACKR1+	FZD4
ELOVL7	1.01362e-40	1.9387	0.465	0.178	3.11537e-36	ACKR1+	ELOVL7
HLA-DQB1	4.41057e-40	1.25261	0.706	0.432	1.35559e-35	ACKR1+	HLA-DQB1
RHOU	9.54418e-40	1.6429	0.592	0.297	2.9334e-35	ACKR1+	RHOU
EPB41L3	1.25696e-38	1.41646	0.646	0.34	3.86327e-34	ACKR1+	EPB41L3
MEOX1	1.74637e-38	1.2507	0.606	0.282	5.36746e-34	ACKR1+	MEOX1
PKP4	5.21788e-38	1.20651	0.653	0.364	1.60372e-33	ACKR1+	PKP4
IL1R1	7.84105e-38	0.772007	0.775	0.486	2.40995e-33	ACKR1+	IL1R1
ADGRL2	1.05731e-37	1.80224	0.502	0.218	3.24964e-33	ACKR1+	ADGRL2
C21orf91	1.16486e-37	2.00632	0.441	0.177	3.58018e-33	ACKR1+	C21orf91
ICAM1	1.4517e-37	1.35769	0.758	0.498	4.46182e-33	ACKR1+	ICAM1
SH3BP5	1.68936e-37	0.869855	0.832	0.629	5.19224e-33	ACKR1+	SH3BP5
RPLP0	5.06301e-37	0.632755	0.965	0.923	1.55612e-32	ACKR1+	RPLP0
DOC2B	2.67345e-36	1.53944	0.618	0.36	8.21685e-32	ACKR1+	DOC2B
IL3RA	3.0114e-36	1.07041	0.636	0.35	9.25553e-32	ACKR1+	IL3RA
HLA-DRB1	3.36153e-35	0.786715	0.903	0.737	1.03317e-30	ACKR1+	HLA-DRB1
INHBB	4.65185e-35	1.37532	0.53	0.237	1.42974e-30	ACKR1+	INHBB
IL33	6.17719e-35	0.881039	0.767	0.486	1.89856e-30	ACKR1+	IL33
C7	1.00948e-34	2.5139	0.444	0.186	3.10263e-30	ACKR1+	C7
NPDC1	1.04013e-34	0.630718	0.918	0.781	3.19684e-30	ACKR1+	NPDC1
PPP2R5A	2.27303e-34	1.20801	0.672	0.422	6.98617e-30	ACKR1+	PPP2R5A
TPT1	2.61932e-34	0.506324	0.998	0.995	8.05047e-30	ACKR1+	TPT1
HLA-DQA1	2.78329e-34	1.71926	0.427	0.159	8.55445e-30	ACKR1+	HLA-DQA1
SLCO2A1	3.40229e-34	0.965323	0.729	0.447	1.04569e-29	ACKR1+	SLCO2A1
NR2F2	5.19016e-34	0.70857	0.824	0.522	1.5952e-29	ACKR1+	NR2F2
NCOA7	2.79635e-33	1.02617	0.778	0.589	8.59458e-29	ACKR1+	NCOA7
SPRY1	3.27878e-33	0.709085	0.849	0.577	1.00773e-28	ACKR1+	SPRY1
DIPK2B	4.07706e-33	0.868963	0.784	0.498	1.25308e-28	ACKR1+	DIPK2B
RPL36A	4.86397e-33	0.549587	0.971	0.922	1.49494e-28	ACKR1+	RPL36A
EHD4	5.28006e-33	0.884686	0.769	0.519	1.62283e-28	ACKR1+	EHD4
PDIA5	6.04265e-33	1.32485	0.51	0.246	1.85721e-28	ACKR1+	PDIA5
CD93	6.20738e-33	0.630442	0.898	0.66	1.90784e-28	ACKR1+	CD93
RPS8	6.40511e-33	0.507963	0.994	0.977	1.96861e-28	ACKR1+	RPS8
IL6	3.459e-32	1.94209	0.468	0.219	1.06312e-27	ACKR1+	IL6
ADAMTS4	3.54933e-32	1.64496	0.559	0.302	1.09089e-27	ACKR1+	ADAMTS4
RPS2	3.79589e-32	0.657543	0.995	0.962	1.16667e-27	ACKR1+	RPS2
CD74	5.07023e-32	0.637167	0.954	0.794	1.55833e-27	ACKR1+	CD74
RPS18	6.25365e-32	0.575893	0.995	0.986	1.92206e-27	ACKR1+	RPS18
SPNS2	1.34266e-31	1.06526	0.641	0.364	4.12667e-27	ACKR1+	SPNS2
HIPK3	2.01567e-31	0.904576	0.827	0.681	6.19517e-27	ACKR1+	HIPK3
CNN3	4.4462e-31	0.724265	0.814	0.624	1.36654e-26	ACKR1+	CNN3
PIK3C2A	5.42798e-31	0.94041	0.837	0.66	1.66829e-26	ACKR1+	PIK3C2A
FAM241A	8.62096e-31	0.984903	0.69	0.456	2.64965e-26	ACKR1+	FAM241A
CYGB	1.65924e-30	1.35359	0.496	0.226	5.09968e-26	ACKR1+	CYGB
NAMPT	2.27909e-30	0.645969	0.883	0.703	7.00478e-26	ACKR1+	NAMPT
NEURL1B	4.4669e-30	1.23686	0.475	0.205	1.3729e-25	ACKR1+	NEURL1B
IFI16	9.14003e-30	0.637822	0.86	0.73	2.80919e-25	ACKR1+	IFI16
RPL4	9.76543e-30	0.545025	0.935	0.85	3.00141e-25	ACKR1+	RPL4
PITPNC1	1.1579e-29	0.998451	0.643	0.381	3.55881e-25	ACKR1+	PITPNC1
TGFBR2	1.25038e-29	0.582894	0.928	0.799	3.84304e-25	ACKR1+	TGFBR2
CMIP	1.61949e-29	0.940917	0.726	0.515	4.9775e-25	ACKR1+	CMIP
HLA-DPA1	3.95309e-29	0.926651	0.78	0.547	1.21498e-24	ACKR1+	HLA-DPA1
CPXM2	4.03497e-29	1.01866	0.696	0.441	1.24015e-24	ACKR1+	CPXM2
TMEM273	4.76303e-29	0.908429	0.613	0.348	1.46392e-24	ACKR1+	TMEM273
TPM3	8.86964e-29	0.532908	0.929	0.838	2.72608e-24	ACKR1+	TPM3
LIFR	1.00481e-28	0.938379	0.874	0.71	3.08828e-24	ACKR1+	LIFR
FAM110D	1.17686e-28	1.00605	0.624	0.363	3.61709e-24	ACKR1+	FAM110D
RPL31	2.99014e-28	0.556078	0.941	0.864	9.19019e-24	ACKR1+	RPL31
CPLX1	4.44407e-28	1.15915	0.586	0.33	1.36588e-23	ACKR1+	CPLX1
ITGA6	4.66251e-28	0.521578	0.866	0.604	1.43302e-23	ACKR1+	ITGA6
MRTFB	8.56428e-28	0.971938	0.815	0.615	2.63223e-23	ACKR1+	MRTFB
ARL4A	8.91996e-28	0.752842	0.794	0.623	2.74155e-23	ACKR1+	ARL4A
RPL37	1.98099e-27	0.508905	0.986	0.971	6.08858e-23	ACKR1+	RPL37
PREX2	3.33994e-27	0.898945	0.781	0.593	1.02653e-22	ACKR1+	PREX2
MARCKSL1	3.41887e-27	0.891235	0.641	0.396	1.05079e-22	ACKR1+	MARCKSL1
EEF1B2	4.15687e-27	0.569054	0.935	0.849	1.27761e-22	ACKR1+	EEF1B2
RPL17	4.74633e-27	0.504564	0.978	0.959	1.45878e-22	ACKR1+	RPL17
EBF1	6.32432e-27	1.03196	0.55	0.293	1.94378e-22	ACKR1+	EBF1
PBX1	7.34968e-27	1.16575	0.607	0.378	2.25892e-22	ACKR1+	PBX1
RPS17	1.17845e-26	0.584767	0.943	0.854	3.62197e-22	ACKR1+	RPS17
IGFBP4	1.5452e-26	0.619176	0.915	0.783	4.74916e-22	ACKR1+	IGFBP4
UPP1	4.78281e-26	1.09282	0.67	0.436	1.47e-21	ACKR1+	UPP1
STC1	9.09729e-26	1.96518	0.445	0.22	2.79605e-21	ACKR1+	STC1
MEOX2	2.25188e-25	1.26757	0.49	0.259	6.92114e-21	ACKR1+	MEOX2
C2CD4B	2.68634e-25	1.46794	0.633	0.425	8.25646e-21	ACKR1+	C2CD4B
SEMA6A	3.2106e-25	0.878221	0.578	0.327	9.86779e-21	ACKR1+	SEMA6A
FLT1	3.58957e-25	0.573902	0.837	0.608	1.10325e-20	ACKR1+	FLT1
CCDC69	6.16341e-25	1.01568	0.618	0.408	1.89432e-20	ACKR1+	CCDC69
RASAL2	6.16844e-25	0.983751	0.658	0.422	1.89587e-20	ACKR1+	RASAL2
EBF3	7.95661e-25	1.36434	0.47	0.241	2.44546e-20	ACKR1+	EBF3
DAAM1	9.78367e-25	1.01372	0.683	0.466	3.00701e-20	ACKR1+	DAAM1
ADGRL4	1.19315e-24	0.538132	0.86	0.669	3.66714e-20	ACKR1+	ADGRL4
DLC1	1.91589e-24	0.804157	0.672	0.436	5.88849e-20	ACKR1+	DLC1
FLI1	2.06156e-24	1.10249	0.639	0.428	6.33621e-20	ACKR1+	FLI1
FAM167B	2.23195e-24	1.2842	0.43	0.206	6.85989e-20	ACKR1+	FAM167B
CLEC2B	2.95287e-24	0.916129	0.638	0.4	9.07564e-20	ACKR1+	CLEC2B
VWA1	5.01398e-24	0.796224	0.666	0.429	1.54105e-19	ACKR1+	VWA1
JAM2	9.35961e-24	0.622456	0.753	0.542	2.87668e-19	ACKR1+	JAM2
CYTH1	5.24793e-23	0.900082	0.613	0.41	1.61295e-18	ACKR1+	CYTH1
LRATD2	6.79066e-23	1.24725	0.482	0.272	2.08711e-18	ACKR1+	LRATD2
HAPLN3	2.9351e-22	0.966126	0.572	0.35	9.02103e-18	ACKR1+	HAPLN3
NDRG1	3.14025e-22	0.57251	0.891	0.805	9.65155e-18	ACKR1+	NDRG1
FKBP11	3.1942e-22	1.04302	0.522	0.307	9.81737e-18	ACKR1+	FKBP11
CEMIP2	4.25852e-22	1.30028	0.539	0.348	1.30886e-17	ACKR1+	CEMIP2
AFAP1	5.21909e-22	1.02719	0.573	0.358	1.60409e-17	ACKR1+	AFAP1
NRP1	5.5498e-22	0.612347	0.761	0.544	1.70573e-17	ACKR1+	NRP1
PLAT	8.03972e-22	0.736869	0.681	0.446	2.47101e-17	ACKR1+	PLAT
HLA-DPB1	8.1045e-22	0.827847	0.732	0.536	2.49092e-17	ACKR1+	HLA-DPB1
SNTB2	1.03947e-21	0.797309	0.701	0.525	3.19482e-17	ACKR1+	SNTB2
CNKSR3	1.11699e-21	0.940637	0.599	0.39	3.43306e-17	ACKR1+	CNKSR3
MCF2L	1.36136e-21	0.576853	0.612	0.337	4.18415e-17	ACKR1+	MCF2L
TMEM88	1.82853e-21	0.526357	0.681	0.395	5.62e-17	ACKR1+	TMEM88
ITM2A	2.29705e-21	0.696413	0.767	0.571	7.05998e-17	ACKR1+	ITM2A
PALM2-AKAP2	4.63251e-21	0.591562	0.858	0.706	1.4238e-16	ACKR1+	PALM2-AKAP2
SLC38A1	5.49427e-21	0.739757	0.453	0.227	1.68866e-16	ACKR1+	SLC38A1
PLSCR1	5.80156e-21	0.689266	0.749	0.587	1.78311e-16	ACKR1+	PLSCR1
RALGAPA2	1.80405e-20	0.698013	0.73	0.557	5.54476e-16	ACKR1+	RALGAPA2
NECTIN2	2.41805e-20	0.712132	0.744	0.581	7.43188e-16	ACKR1+	NECTIN2
USP36	2.43839e-20	1.29896	0.481	0.281	7.49438e-16	ACKR1+	USP36
PMP22	5.30587e-20	0.656474	0.746	0.557	1.63076e-15	ACKR1+	PMP22
EMCN	5.55369e-20	0.520613	0.835	0.597	1.70693e-15	ACKR1+	EMCN
NOP53	7.8793e-20	0.526721	0.864	0.758	2.4217e-15	ACKR1+	NOP53
RAPGEF4	8.97142e-20	1.19059	0.447	0.242	2.75737e-15	ACKR1+	RAPGEF4
NRN1	1.02108e-19	0.659378	0.727	0.579	3.1383e-15	ACKR1+	NRN1
MARCKS	1.97744e-19	0.643138	0.77	0.596	6.07765e-15	ACKR1+	MARCKS
EGLN1	2.51167e-19	0.695935	0.687	0.51	7.71962e-15	ACKR1+	EGLN1
CYYR1	6.2984e-19	0.538567	0.773	0.572	1.93581e-14	ACKR1+	CYYR1
CLEC1A	7.89088e-19	1.0983	0.433	0.242	2.42526e-14	ACKR1+	CLEC1A
ENTPD1	2.72703e-18	0.762331	0.658	0.459	8.38151e-14	ACKR1+	ENTPD1
HLA-DMA	2.94943e-18	0.771688	0.627	0.431	9.06507e-14	ACKR1+	HLA-DMA
SPTLC2	3.20722e-18	0.931645	0.65	0.478	9.85738e-14	ACKR1+	SPTLC2
EIF3E	3.32709e-18	0.535161	0.837	0.748	1.02258e-13	ACKR1+	EIF3E
RASSF9	5.03996e-18	0.933559	0.487	0.288	1.54903e-13	ACKR1+	RASSF9
SNHG16	5.22563e-18	0.836028	0.627	0.463	1.6061e-13	ACKR1+	SNHG16
PLSCR4	6.62466e-18	0.720312	0.693	0.529	2.03609e-13	ACKR1+	PLSCR4
DDX21	9.0181e-18	0.700798	0.744	0.594	2.77171e-13	ACKR1+	DDX21
CDC42EP3	1.05513e-17	0.523475	0.744	0.563	3.24293e-13	ACKR1+	CDC42EP3
SEMA6B	1.42451e-17	0.579436	0.552	0.335	4.37823e-13	ACKR1+	SEMA6B
SNHG5	1.47124e-17	0.558755	0.84	0.702	4.52185e-13	ACKR1+	SNHG5
HSPD1	1.74142e-17	0.587472	0.82	0.684	5.35225e-13	ACKR1+	HSPD1
CSRP2	3.35126e-17	1.09161	0.516	0.336	1.03001e-12	ACKR1+	CSRP2
FBL	3.60652e-17	0.741479	0.619	0.453	1.10846e-12	ACKR1+	FBL
FAM171A1	5.17733e-17	1.39315	0.422	0.244	1.59125e-12	ACKR1+	FAM171A1
LYST	6.2369e-17	0.715612	0.744	0.584	1.91691e-12	ACKR1+	LYST
MALL	7.11583e-17	0.833075	0.629	0.458	2.18705e-12	ACKR1+	MALL
ATP8B1	1.15831e-16	0.793488	0.593	0.41	3.56008e-12	ACKR1+	ATP8B1
BZW2	1.33763e-16	0.964846	0.498	0.317	4.1112e-12	ACKR1+	BZW2
EVA1C	1.41388e-16	0.714295	0.672	0.503	4.34556e-12	ACKR1+	EVA1C
TNFAIP3	1.7183e-16	0.964871	0.586	0.4	5.28121e-12	ACKR1+	TNFAIP3
PIP4K2A	2.0772e-16	0.959391	0.441	0.261	6.38427e-12	ACKR1+	PIP4K2A
TRIB1	2.14969e-16	0.966275	0.484	0.304	6.60706e-12	ACKR1+	TRIB1
SLCO4A1	3.39583e-16	0.607576	0.562	0.362	1.04371e-11	ACKR1+	SLCO4A1
MCTP1	3.64373e-16	0.537823	0.761	0.581	1.1199e-11	ACKR1+	MCTP1
LTBR	3.72945e-16	0.872091	0.587	0.427	1.14625e-11	ACKR1+	LTBR
PDLIM1	4.96526e-16	0.522083	0.874	0.782	1.52607e-11	ACKR1+	PDLIM1
PRSS23	5.24941e-16	0.519955	0.735	0.553	1.61341e-11	ACKR1+	PRSS23
PDE2A	8.13704e-16	0.666703	0.618	0.409	2.50092e-11	ACKR1+	PDE2A
RGS16	8.47534e-16	1.07031	0.521	0.349	2.6049e-11	ACKR1+	RGS16
ABCD4	9.75518e-16	0.922819	0.542	0.36	2.99826e-11	ACKR1+	ABCD4
SERPINB1	1.12094e-15	0.589283	0.723	0.564	3.44521e-11	ACKR1+	SERPINB1
MYRIP	1.34188e-15	0.736389	0.53	0.335	4.12426e-11	ACKR1+	MYRIP
RELL1	1.48447e-15	0.745524	0.598	0.433	4.56252e-11	ACKR1+	RELL1
TSPAN12	2.07234e-15	1.27713	0.421	0.253	6.36935e-11	ACKR1+	TSPAN12
SLC25A25	2.20412e-15	1.03963	0.478	0.31	6.77435e-11	ACKR1+	SLC25A25
TAPBP	2.25595e-15	0.584527	0.743	0.604	6.93366e-11	ACKR1+	TAPBP
CCNG2	2.43157e-15	0.89619	0.501	0.326	7.47345e-11	ACKR1+	CCNG2
FBN1	2.58662e-15	0.999766	0.649	0.481	7.94996e-11	ACKR1+	FBN1
PERP	3.35526e-15	0.604616	0.599	0.392	1.03124e-10	ACKR1+	PERP
SAV1	3.57171e-15	0.700228	0.675	0.527	1.09777e-10	ACKR1+	SAV1
MRPL32	3.74204e-15	0.840566	0.582	0.423	1.15012e-10	ACKR1+	MRPL32
TMEM255B	4.79951e-15	0.782439	0.589	0.399	1.47513e-10	ACKR1+	TMEM255B
ARHGEF3	7.29691e-15	0.681313	0.562	0.395	2.24271e-10	ACKR1+	ARHGEF3
SLC1A5	8.37744e-15	1.09281	0.405	0.242	2.57481e-10	ACKR1+	SLC1A5
SINHCAF	1.31996e-14	0.891378	0.481	0.318	4.05688e-10	ACKR1+	SINHCAF
MAP3K8	1.34485e-14	0.617813	0.652	0.49	4.1334e-10	ACKR1+	MAP3K8
MAT2A	1.40261e-14	1.1072	0.592	0.428	4.31091e-10	ACKR1+	MAT2A
SAMHD1	1.83739e-14	0.760378	0.51	0.345	5.64721e-10	ACKR1+	SAMHD1
MAPK11	2.14853e-14	0.973142	0.445	0.277	6.6035e-10	ACKR1+	MAPK11
CFI	2.3097e-14	0.672996	0.695	0.538	7.09886e-10	ACKR1+	CFI
GNS	3.25412e-14	0.650677	0.635	0.473	1.00015e-09	ACKR1+	GNS
YPEL2	3.57521e-14	0.855004	0.627	0.489	1.09884e-09	ACKR1+	YPEL2
ATP11C	5.11989e-14	0.762704	0.545	0.389	1.5736e-09	ACKR1+	ATP11C
IMPDH2	5.41139e-14	0.83346	0.524	0.371	1.66319e-09	ACKR1+	IMPDH2
VWF	6.82845e-14	0.538128	0.949	0.909	2.09872e-09	ACKR1+	VWF
FNBP1L	8.25177e-14	0.538121	0.69	0.539	2.53618e-09	ACKR1+	FNBP1L
HIF1A	9.2506e-14	0.702178	0.715	0.609	2.84317e-09	ACKR1+	HIF1A
RAI14	1.15798e-13	0.629355	0.607	0.446	3.55906e-09	ACKR1+	RAI14
VGLL4	1.98316e-13	0.591506	0.684	0.535	6.09525e-09	ACKR1+	VGLL4
BCL3	2.06653e-13	0.738611	0.539	0.372	6.35147e-09	ACKR1+	BCL3
KLF7	3.15658e-13	0.626652	0.672	0.531	9.70174e-09	ACKR1+	KLF7
PRKAG2	5.52258e-13	0.805475	0.502	0.34	1.69736e-08	ACKR1+	PRKAG2
BAZ1A	5.6731e-13	0.705453	0.582	0.437	1.74363e-08	ACKR1+	BAZ1A
SOD2	5.79774e-13	0.684521	0.863	0.753	1.78194e-08	ACKR1+	SOD2
RPS26	6.91625e-13	0.643213	0.929	0.884	2.12571e-08	ACKR1+	RPS26
CD109	8.39241e-13	0.575298	0.549	0.377	2.57941e-08	ACKR1+	CD109
IKBIP	1.23085e-12	0.666181	0.535	0.373	3.78302e-08	ACKR1+	IKBIP
BHLHE40	1.26992e-12	0.511231	0.814	0.695	3.90309e-08	ACKR1+	BHLHE40
NHSL2	1.55937e-12	0.677419	0.61	0.451	4.79271e-08	ACKR1+	NHSL2
CCT4	1.86962e-12	0.526773	0.661	0.517	5.74628e-08	ACKR1+	CCT4
TRIB2	2.04135e-12	0.910201	0.473	0.318	6.2741e-08	ACKR1+	TRIB2
CLIP1	2.47025e-12	0.598687	0.632	0.51	7.5923e-08	ACKR1+	CLIP1
STARD9	3.31054e-12	0.93089	0.459	0.302	1.01749e-07	ACKR1+	STARD9
ITGA2	3.81666e-12	0.85232	0.416	0.255	1.17305e-07	ACKR1+	ITGA2
UGCG	4.35265e-12	0.612832	0.586	0.445	1.33779e-07	ACKR1+	UGCG
PCAT19	4.82021e-12	0.507883	0.772	0.636	1.48149e-07	ACKR1+	PCAT19
SPHK1	5.60279e-12	0.531871	0.468	0.3	1.72202e-07	ACKR1+	SPHK1
IL13RA1	7.00097e-12	0.761613	0.599	0.456	2.15175e-07	ACKR1+	IL13RA1
EFHD2	7.34511e-12	0.747314	0.519	0.371	2.25752e-07	ACKR1+	EFHD2
CLIC2	7.34548e-12	0.589944	0.575	0.458	2.25763e-07	ACKR1+	CLIC2
RSL1D1	7.51722e-12	0.692212	0.612	0.481	2.31042e-07	ACKR1+	RSL1D1
NOB1	7.94746e-12	0.935237	0.468	0.332	2.44265e-07	ACKR1+	NOB1
TNFRSF10A	8.70004e-12	0.781572	0.445	0.293	2.67396e-07	ACKR1+	TNFRSF10A
GBP2	9.19179e-12	0.645911	0.599	0.465	2.8251e-07	ACKR1+	GBP2
RPS6KA3	9.7673e-12	0.551614	0.67	0.526	3.00198e-07	ACKR1+	RPS6KA3
ICA1	1.02373e-11	0.708894	0.584	0.434	3.14642e-07	ACKR1+	ICA1
TPBG	1.15885e-11	0.57841	0.45	0.295	3.56173e-07	ACKR1+	TPBG
MED13L	1.35007e-11	0.549132	0.743	0.621	4.14943e-07	ACKR1+	MED13L
NOL4L	1.35363e-11	0.677933	0.481	0.328	4.16037e-07	ACKR1+	NOL4L
DNAJA1	1.40311e-11	0.550178	0.852	0.748	4.31244e-07	ACKR1+	DNAJA1
ABCG1	1.5664e-11	0.535914	0.622	0.473	4.81433e-07	ACKR1+	ABCG1
PABPC4	1.67506e-11	0.765985	0.57	0.432	5.14831e-07	ACKR1+	PABPC4
F2R	1.96176e-11	0.532057	0.448	0.286	6.02947e-07	ACKR1+	F2R
GNB4	2.03048e-11	0.845795	0.522	0.383	6.24069e-07	ACKR1+	GNB4
PLEKHG1	2.37654e-11	0.539064	0.602	0.439	7.30429e-07	ACKR1+	PLEKHG1
WDR43	2.7434e-11	0.738904	0.51	0.365	8.43185e-07	ACKR1+	WDR43
TYMP	2.97456e-11	0.68321	0.495	0.332	9.14232e-07	ACKR1+	TYMP
RRAGC	3.69477e-11	0.854645	0.467	0.323	1.13559e-06	ACKR1+	RRAGC
SHB	4.28947e-11	0.760708	0.425	0.284	1.31837e-06	ACKR1+	SHB
SSBP3	4.31887e-11	0.847868	0.421	0.276	1.32741e-06	ACKR1+	SSBP3
PIM3	4.84441e-11	0.51508	0.698	0.576	1.48893e-06	ACKR1+	PIM3
ARL5B	4.89935e-11	0.79486	0.519	0.378	1.50582e-06	ACKR1+	ARL5B
CPD	5.5763e-11	0.595239	0.646	0.5	1.71388e-06	ACKR1+	CPD
CARD8	6.70628e-11	0.748357	0.573	0.433	2.06117e-06	ACKR1+	CARD8
EBPL	7.3355e-11	0.631419	0.521	0.393	2.25457e-06	ACKR1+	EBPL
EPB41L4A	7.37207e-11	0.587997	0.542	0.396	2.26581e-06	ACKR1+	EPB41L4A
PNN	7.74133e-11	0.500211	0.733	0.626	2.3793e-06	ACKR1+	PNN
MIR22HG	8.39351e-11	0.521887	0.516	0.368	2.57975e-06	ACKR1+	MIR22HG
SRSF4	1.39818e-10	0.538107	0.713	0.593	4.29729e-06	ACKR1+	SRSF4
GSE1	1.5165e-10	0.880579	0.467	0.322	4.66097e-06	ACKR1+	GSE1
NFKBIA	2.08686e-10	0.58642	0.938	0.883	6.41397e-06	ACKR1+	NFKBIA
TMCC3	2.29838e-10	0.808108	0.444	0.301	7.06407e-06	ACKR1+	TMCC3
ADCY4	2.5339e-10	0.511133	0.812	0.672	7.78796e-06	ACKR1+	ADCY4
SUSD6	2.54151e-10	0.551252	0.435	0.293	7.81132e-06	ACKR1+	SUSD6
NUDCD1	2.7224e-10	0.815324	0.455	0.314	8.36729e-06	ACKR1+	NUDCD1
CHD7	2.77145e-10	0.661604	0.448	0.307	8.51806e-06	ACKR1+	CHD7
RAPH1	4.02967e-10	0.770898	0.476	0.341	1.23852e-05	ACKR1+	RAPH1
SHROOM4	5.10776e-10	0.629894	0.587	0.448	1.56987e-05	ACKR1+	SHROOM4
B4GALT5	5.25458e-10	0.753484	0.456	0.319	1.61499e-05	ACKR1+	B4GALT5
GBP4	5.64634e-10	0.563068	0.602	0.471	1.7354e-05	ACKR1+	GBP4
GFOD2	5.71482e-10	0.765077	0.473	0.334	1.75645e-05	ACKR1+	GFOD2
METTL7A	6.1703e-10	0.61349	0.629	0.503	1.89644e-05	ACKR1+	METTL7A
NANS	6.67865e-10	0.679748	0.507	0.378	2.05268e-05	ACKR1+	NANS
EIF3M	6.91774e-10	0.503245	0.643	0.524	2.12617e-05	ACKR1+	EIF3M
EPHB4	7.61476e-10	0.631486	0.596	0.473	2.3404e-05	ACKR1+	EPHB4
SCN1B	7.61672e-10	0.648852	0.445	0.307	2.341e-05	ACKR1+	SCN1B
TMEM70	8.15488e-10	0.723785	0.484	0.348	2.5064e-05	ACKR1+	TMEM70
DGKH	8.8412e-10	0.724299	0.485	0.35	2.71734e-05	ACKR1+	DGKH
SBNO2	1.07888e-09	0.543849	0.458	0.319	3.31593e-05	ACKR1+	SBNO2
NUTM2A-AS1	1.29433e-09	0.559602	0.524	0.39	3.97813e-05	ACKR1+	NUTM2A-AS1
BAIAP2	1.55435e-09	0.819455	0.401	0.271	4.77728e-05	ACKR1+	BAIAP2
TLE3	1.6671e-09	0.806018	0.401	0.268	5.12383e-05	ACKR1+	TLE3
TOMM5	2.5798e-09	0.640371	0.573	0.464	7.92901e-05	ACKR1+	TOMM5
OSMR	4.66702e-09	0.633179	0.521	0.392	0.000143441	ACKR1+	OSMR
TBCD	5.74497e-09	0.663161	0.436	0.303	0.000176572	ACKR1+	TBCD
RND1	6.18032e-09	0.623273	0.428	0.295	0.000189952	ACKR1+	RND1
FRY	6.76361e-09	0.584283	0.552	0.412	0.00020788	ACKR1+	FRY
SCARF1	9.18518e-09	0.659146	0.498	0.368	0.000282306	ACKR1+	SCARF1
TIFA	1.03958e-08	0.831943	0.411	0.293	0.000319515	ACKR1+	TIFA
PON2	1.22287e-08	0.66004	0.579	0.457	0.000375851	ACKR1+	PON2
TRIM25	1.51893e-08	0.620133	0.493	0.367	0.000466842	ACKR1+	TRIM25
ADGRA2	1.63282e-08	0.534756	0.47	0.338	0.000501848	ACKR1+	ADGRA2
RALGDS	1.76408e-08	0.727911	0.476	0.359	0.000542189	ACKR1+	RALGDS
MYO9A	2.07851e-08	0.635806	0.569	0.445	0.00063883	ACKR1+	MYO9A
ZNF593	2.13386e-08	0.573357	0.411	0.29	0.000655843	ACKR1+	ZNF593
RBMS2	2.30969e-08	0.514228	0.613	0.494	0.000709883	ACKR1+	RBMS2
RPL39	4.2893e-08	0.511577	0.966	0.942	0.00131832	ACKR1+	RPL39
CASP4	4.51084e-08	0.506486	0.658	0.553	0.00138641	ACKR1+	CASP4
TSHZ1	5.62386e-08	0.536544	0.456	0.339	0.00172849	ACKR1+	TSHZ1
POLE4	7.10829e-08	0.503809	0.553	0.425	0.00218473	ACKR1+	POLE4
LAPTM4B	7.3273e-08	0.684297	0.451	0.327	0.00225205	ACKR1+	LAPTM4B
STXBP1	8.9861e-08	0.679626	0.436	0.313	0.00276188	ACKR1+	STXBP1
MCUR1	9.75109e-08	0.68467	0.451	0.345	0.002997	ACKR1+	MCUR1
NFE2L1	1.29529e-07	0.527453	0.656	0.563	0.00398107	ACKR1+	NFE2L1
ACER3	1.31389e-07	0.704071	0.411	0.297	0.00403826	ACKR1+	ACER3
CDC42BPB	1.42789e-07	0.509745	0.632	0.529	0.00438864	ACKR1+	CDC42BPB
SMAGP	1.87615e-07	0.557387	0.401	0.275	0.00576636	ACKR1+	SMAGP
MYO5A	2.31057e-07	0.752174	0.438	0.328	0.00710153	ACKR1+	MYO5A
CADPS2	2.39483e-07	0.516329	0.516	0.396	0.0073605	ACKR1+	CADPS2
APEX1	3.03286e-07	0.540318	0.507	0.397	0.00932149	ACKR1+	APEX1
NT5C3A	3.29261e-07	0.535771	0.442	0.328	0.0101199	ACKR1+	NT5C3A
HSPA4	3.44615e-07	0.613665	0.495	0.384	0.0105917	ACKR1+	HSPA4
LRP5	4.94208e-07	0.609024	0.422	0.308	0.0151895	ACKR1+	LRP5
PAXX	5.32444e-07	0.544776	0.448	0.341	0.0163647	ACKR1+	PAXX
USP25	5.56977e-07	0.666377	0.435	0.325	0.0171187	ACKR1+	USP25
ECPAS	6.29438e-07	0.561503	0.447	0.338	0.0193458	ACKR1+	ECPAS
UBXN7	7.09686e-07	0.676374	0.427	0.316	0.0218122	ACKR1+	UBXN7
PLXND1	8.16792e-07	0.539393	0.678	0.584	0.0251041	ACKR1+	PLXND1
PPP1R13B	9.7643e-07	0.539139	0.476	0.365	0.0300106	ACKR1+	PPP1R13B
SLC66A2	1.26343e-06	0.631096	0.455	0.353	0.0388314	ACKR1+	SLC66A2
CCDC68	1.84144e-06	0.566474	0.445	0.329	0.0565966	ACKR1+	CCDC68
SLC25A24	2.04424e-06	0.520523	0.447	0.339	0.0628298	ACKR1+	SLC25A24
BTG3	2.22241e-06	0.782308	0.416	0.321	0.0683058	ACKR1+	BTG3
OTUD4	2.44388e-06	0.600104	0.422	0.33	0.0751126	ACKR1+	OTUD4
GPCPD1	3.19352e-06	0.648315	0.401	0.303	0.0981529	ACKR1+	GPCPD1
COQ10B	6.26873e-06	0.636474	0.479	0.386	0.192669	ACKR1+	COQ10B
CNIH1	1.23377e-05	0.546471	0.505	0.411	0.3792	ACKR1+	CNIH1
NUDT16	1.82157e-05	0.743237	0.414	0.328	0.559859	ACKR1+	NUDT16
TRIO	1.83479e-05	0.530896	0.488	0.397	0.563924	ACKR1+	TRIO
SERTAD2	2.23388e-05	0.515374	0.445	0.36	0.686582	ACKR1+	SERTAD2
CHIC2	4.61723e-05	0.540512	0.476	0.403	1	ACKR1+	CHIC2
FGD4	5.22558e-05	0.519926	0.459	0.367	1	ACKR1+	FGD4
PRRC2A	6.136e-05	0.560659	0.438	0.351	1	ACKR1+	PRRC2A
MTRNR2L8	0.00307276	0.666881	0.812	0.758	1	ACKR1+	MTRNR2L8
BTNL9	5.68181e-148	5.14656	0.708	0.096	1.7463e-143	SEMA3G+	BTNL9
TIMP3	3.51159e-109	2.30533	0.98	0.777	1.07929e-104	SEMA3G+	TIMP3
ADGRF5	8.40165e-91	2.75183	0.777	0.329	2.58225e-86	SEMA3G+	ADGRF5
CXCL12	2.71455e-86	3.09803	0.821	0.43	8.34316e-82	SEMA3G+	CXCL12
SEMA3G	4.04802e-84	4.65377	0.409	0.037	1.24416e-79	SEMA3G+	SEMA3G
BST2	1.11862e-75	2.04481	0.836	0.488	3.43806e-71	SEMA3G+	BST2
A2M	2.72581e-72	1.4053	0.962	0.768	8.37778e-68	SEMA3G+	A2M
IFI27	1.04167e-70	1.53665	0.946	0.732	3.20157e-66	SEMA3G+	IFI27
GSN	1.45314e-69	1.13906	0.987	0.92	4.46624e-65	SEMA3G+	GSN
H19	1.64661e-65	4.03498	0.54	0.158	5.06085e-61	SEMA3G+	H19
ICAM2	1.52618e-64	1.91131	0.816	0.588	4.69073e-60	SEMA3G+	ICAM2
HLA-C	1.14099e-62	1.09044	0.977	0.92	3.50682e-58	SEMA3G+	HLA-C
HEY1	5.73596e-62	2.87186	0.56	0.175	1.76295e-57	SEMA3G+	HEY1
SLC9A3R2	1.20021e-61	2.17547	0.826	0.678	3.68886e-57	SEMA3G+	SLC9A3R2
NOTCH4	1.47938e-61	2.06812	0.752	0.399	4.54686e-57	SEMA3G+	NOTCH4
HLA-B	6.39642e-61	0.810125	0.985	0.953	1.96594e-56	SEMA3G+	HLA-B
RGCC	1.37031e-60	3.10013	0.57	0.193	4.21164e-56	SEMA3G+	RGCC
FABP4	1.56117e-57	2.01769	0.859	0.545	4.79827e-53	SEMA3G+	FABP4
EFNB1	2.60107e-57	2.96692	0.56	0.203	7.99439e-53	SEMA3G+	EFNB1
HLA-A	2.64739e-55	0.792031	0.987	0.938	8.13675e-51	SEMA3G+	HLA-A
PIK3R3	1.66579e-54	1.69542	0.841	0.617	5.11981e-50	SEMA3G+	PIK3R3
CLDN5	2.13743e-52	1.37819	0.934	0.726	6.56939e-48	SEMA3G+	CLDN5
CAV1	1.73321e-50	1.0491	0.974	0.937	5.32703e-46	SEMA3G+	CAV1
PODXL	2.1329e-50	1.67291	0.818	0.6	6.55548e-46	SEMA3G+	PODXL
VSIR	9.8941e-49	1.99624	0.675	0.372	3.04095e-44	SEMA3G+	VSIR
JAG2	3.12496e-46	2.69889	0.598	0.277	9.60457e-42	SEMA3G+	JAG2
FAM107A	2.03919e-45	1.70206	0.752	0.493	6.26744e-41	SEMA3G+	FAM107A
B2M	2.62172e-45	0.577877	0.997	0.993	8.05784e-41	SEMA3G+	B2M
SGK1	6.01754e-44	2.13146	0.708	0.458	1.84949e-39	SEMA3G+	SGK1
SOX17	1.05076e-43	1.7937	0.683	0.355	3.2295e-39	SEMA3G+	SOX17
MGLL	3.89604e-42	1.47648	0.816	0.631	1.19745e-37	SEMA3G+	MGLL
GPIHBP1	7.69357e-42	2.85633	0.476	0.176	2.36462e-37	SEMA3G+	GPIHBP1
SRP14	8.83653e-41	1.26557	0.934	0.905	2.71591e-36	SEMA3G+	SRP14
LCN6	2.03506e-39	1.61873	0.711	0.393	6.25474e-35	SEMA3G+	LCN6
IGFBP3	1.98217e-38	0.511039	0.754	0.343	6.09219e-34	SEMA3G+	IGFBP3
TCIM	2.78527e-37	2.12877	0.621	0.341	8.56052e-33	SEMA3G+	TCIM
EPAS1	3.37212e-37	0.842868	0.962	0.889	1.03642e-32	SEMA3G+	EPAS1
PREX1	5.77913e-37	2.79759	0.465	0.188	1.77622e-32	SEMA3G+	PREX1
RBP7	7.94445e-37	2.21902	0.655	0.411	2.44173e-32	SEMA3G+	RBP7
ESAM	2.29962e-36	1.03576	0.824	0.698	7.06788e-32	SEMA3G+	ESAM
AIF1L	3.74668e-35	1.86668	0.593	0.336	1.15154e-30	SEMA3G+	AIF1L
RAMP2	1.90139e-32	1.02508	0.841	0.769	5.84393e-28	SEMA3G+	RAMP2
RDX	2.27817e-32	1.10608	0.844	0.776	7.00195e-28	SEMA3G+	RDX
NEDD9	2.46693e-30	0.881971	0.862	0.762	7.58212e-26	SEMA3G+	NEDD9
LAP3	3.00467e-30	1.21367	0.739	0.606	9.23486e-26	SEMA3G+	LAP3
TMSB10	7.55841e-30	0.628855	0.992	0.987	2.32308e-25	SEMA3G+	TMSB10
GNG11	8.99395e-30	0.739052	0.895	0.829	2.76429e-25	SEMA3G+	GNG11
CX3CL1	2.30025e-29	1.91754	0.583	0.321	7.06983e-25	SEMA3G+	CX3CL1
ADAM15	3.04879e-29	0.938205	0.857	0.684	9.37045e-25	SEMA3G+	ADAM15
XAF1	5.70131e-29	1.61193	0.688	0.457	1.7523e-24	SEMA3G+	XAF1
PLCB1	5.63078e-28	1.5598	0.647	0.429	1.73062e-23	SEMA3G+	PLCB1
PLPP1	9.89523e-28	1.46133	0.711	0.57	3.0413e-23	SEMA3G+	PLPP1
ADAMTS6	1.33191e-27	2.33862	0.402	0.159	4.09364e-23	SEMA3G+	ADAMTS6
PPARG	1.38465e-27	2.0966	0.501	0.262	4.25571e-23	SEMA3G+	PPARG
RHOC	2.45227e-27	0.983405	0.801	0.732	7.53705e-23	SEMA3G+	RHOC
LCN10	6.78776e-27	1.80831	0.496	0.236	2.08622e-22	SEMA3G+	LCN10
SPARCL1	3.0473e-26	0.575311	0.997	0.929	9.36588e-22	SEMA3G+	SPARCL1
TPM1	3.40848e-26	0.924045	0.803	0.684	1.0476e-21	SEMA3G+	TPM1
ADGRL41	8.21758e-26	0.865628	0.847	0.714	2.52567e-21	SEMA3G+	ADGRL4
UACA	9.76192e-26	1.11172	0.772	0.689	3.00033e-21	SEMA3G+	UACA
NES	1.90199e-25	1.3822	0.662	0.474	5.84578e-21	SEMA3G+	NES
IL32	2.12022e-25	1.51335	0.598	0.368	6.51651e-21	SEMA3G+	IL32
SYNE2	3.40403e-25	0.761404	0.921	0.849	1.04623e-20	SEMA3G+	SYNE2
ARL15	2.16019e-24	2.49372	0.478	0.257	6.63933e-20	SEMA3G+	ARL15
GFOD1	2.93869e-24	1.17779	0.716	0.521	9.03208e-20	SEMA3G+	GFOD1
SOX18	3.63564e-24	1.02342	0.813	0.679	1.11742e-19	SEMA3G+	SOX18
SORBS2	1.319e-23	1.3158	0.609	0.389	4.05395e-19	SEMA3G+	SORBS2
SEC14L1	2.15637e-23	0.852924	0.836	0.788	6.6276e-19	SEMA3G+	SEC14L1
PDGFB	4.4739e-23	1.45747	0.606	0.387	1.37505e-18	SEMA3G+	PDGFB
CRIP2	1.00745e-22	0.72594	0.867	0.824	3.0964e-18	SEMA3G+	CRIP2
CD81	1.62552e-22	0.703154	0.895	0.856	4.99604e-18	SEMA3G+	CD81
ITGA1	1.88612e-22	1.64981	0.616	0.445	5.797e-18	SEMA3G+	ITGA1
RAC1	3.29525e-22	0.598971	0.87	0.878	1.01279e-17	SEMA3G+	RAC1
FADS3	4.02782e-22	1.80541	0.565	0.371	1.23795e-17	SEMA3G+	FADS3
FLT11	4.20677e-22	0.862235	0.831	0.659	1.29295e-17	SEMA3G+	FLT1
ADIPOR2	5.01472e-22	1.48117	0.596	0.411	1.54127e-17	SEMA3G+	ADIPOR2
SRGN	8.95955e-22	0.845883	0.872	0.778	2.75372e-17	SEMA3G+	SRGN
TSPAN13	1.77891e-21	1.96794	0.43	0.227	5.46748e-17	SEMA3G+	TSPAN13
ACTN4	5.56129e-21	0.677126	0.87	0.825	1.70926e-16	SEMA3G+	ACTN4
F8	5.93853e-21	1.53465	0.542	0.335	1.82521e-16	SEMA3G+	F8
MSX1	1.49653e-20	1.61921	0.437	0.219	4.5996e-16	SEMA3G+	MSX1
PALMD	2.05854e-20	0.838697	0.829	0.753	6.32694e-16	SEMA3G+	PALMD
SLC12A2	2.51059e-20	1.86447	0.44	0.233	7.71629e-16	SEMA3G+	SLC12A2
UTRN	4.06708e-20	0.775763	0.854	0.813	1.25002e-15	SEMA3G+	UTRN
CD34	5.22575e-20	0.668062	0.875	0.772	1.60613e-15	SEMA3G+	CD34
CDH5	6.02002e-20	0.777617	0.834	0.777	1.85025e-15	SEMA3G+	CDH5
PPA1	6.43111e-20	0.987705	0.726	0.655	1.9766e-15	SEMA3G+	PPA1
FABP5	1.48711e-19	1.01494	0.777	0.625	4.57062e-15	SEMA3G+	FABP5
ITGA61	2.04084e-19	0.857312	0.826	0.673	6.27253e-15	SEMA3G+	ITGA6
ARHGAP29	2.33617e-19	0.727686	0.875	0.844	7.18021e-15	SEMA3G+	ARHGAP29
GNAI2	3.02888e-19	0.5745	0.9	0.885	9.30927e-15	SEMA3G+	GNAI2
MAST4	3.49647e-19	1.28733	0.691	0.548	1.07464e-14	SEMA3G+	MAST4
IFI6	4.91438e-19	1.69633	0.583	0.397	1.51044e-14	SEMA3G+	IFI6
FILIP1	6.51827e-19	0.90988	0.616	0.402	2.00339e-14	SEMA3G+	FILIP1
SPRY11	7.25752e-19	0.872816	0.821	0.645	2.2306e-14	SEMA3G+	SPRY1
DLL4	1.12407e-18	1.75862	0.473	0.273	3.45483e-14	SEMA3G+	DLL4
WNK1	3.50972e-18	0.673464	0.836	0.761	1.07871e-13	SEMA3G+	WNK1
SWAP70	4.97243e-18	0.678159	0.834	0.735	1.52828e-13	SEMA3G+	SWAP70
CLIC4	1.52215e-17	0.747113	0.803	0.716	4.67834e-13	SEMA3G+	CLIC4
MLEC	1.61813e-17	1.73401	0.504	0.342	4.97333e-13	SEMA3G+	MLEC
HYAL2	3.80116e-17	0.680514	0.813	0.745	1.16829e-12	SEMA3G+	HYAL2
LRRC8A	9.2283e-17	1.13092	0.634	0.488	2.83632e-12	SEMA3G+	LRRC8A
TXNIP	9.47116e-17	0.645906	0.934	0.904	2.91096e-12	SEMA3G+	TXNIP
ADGRG1	1.48264e-16	0.818827	0.714	0.568	4.5569e-12	SEMA3G+	ADGRG1
IFNGR1	1.71295e-16	1.02826	0.711	0.604	5.26475e-12	SEMA3G+	IFNGR1
TACC1	2.54628e-16	0.547555	0.918	0.874	7.82598e-12	SEMA3G+	TACC1
CTTNBP2NL	2.74869e-16	1.04579	0.724	0.627	8.44811e-12	SEMA3G+	CTTNBP2NL
TAGLN2	2.99888e-16	0.571426	0.829	0.798	9.21706e-12	SEMA3G+	TAGLN2
CRYBG3	5.76834e-16	1.1608	0.655	0.507	1.7729e-11	SEMA3G+	CRYBG3
KIAA1217	8.91648e-16	1.52225	0.465	0.288	2.74048e-11	SEMA3G+	KIAA1217
RASGRF2	1.059e-15	1.25212	0.43	0.248	3.25484e-11	SEMA3G+	RASGRF2
MGAT1	1.81197e-15	0.947941	0.673	0.564	5.5691e-11	SEMA3G+	MGAT1
RAPGEF2	2.25894e-15	1.32581	0.578	0.439	6.94284e-11	SEMA3G+	RAPGEF2
CAVIN3	2.57477e-15	1.18747	0.632	0.525	7.91356e-11	SEMA3G+	CAVIN3
MCF2L1	3.5956e-15	1.20134	0.57	0.409	1.10511e-10	SEMA3G+	MCF2L
PCDH1	3.93922e-15	1.20954	0.565	0.4	1.21072e-10	SEMA3G+	PCDH1
SOS1	8.02839e-15	1.52885	0.517	0.368	2.46752e-10	SEMA3G+	SOS1
CYYR11	8.83554e-15	0.741985	0.731	0.629	2.7156e-10	SEMA3G+	CYYR1
MMRN2	9.5851e-15	0.716969	0.795	0.711	2.94598e-10	SEMA3G+	MMRN2
FRMD4A	1.06809e-14	1.29327	0.532	0.355	3.28277e-10	SEMA3G+	FRMD4A
HSPA12B	1.4149e-14	1.40545	0.478	0.323	4.3487e-10	SEMA3G+	HSPA12B
PLS3	2.03652e-14	0.872345	0.693	0.625	6.25924e-10	SEMA3G+	PLS3
RNASE1	3.93755e-14	0.516209	0.887	0.8	1.21021e-09	SEMA3G+	RNASE1
ASS1	4.2565e-14	1.07	0.575	0.43	1.30823e-09	SEMA3G+	ASS1
TMEM47	5.32168e-14	1.14725	0.524	0.37	1.63562e-09	SEMA3G+	TMEM47
EMP2	5.62203e-14	0.681623	0.795	0.763	1.72793e-09	SEMA3G+	EMP2
COL18A1	6.8475e-14	0.735194	0.742	0.634	2.10458e-09	SEMA3G+	COL18A1
NAV1	9.76633e-14	1.11465	0.547	0.392	3.00168e-09	SEMA3G+	NAV1
THSD7A	1.19303e-13	1.22432	0.632	0.496	3.66678e-09	SEMA3G+	THSD7A
LPCAT2	1.71384e-13	1.17341	0.558	0.391	5.26748e-09	SEMA3G+	LPCAT2
BTG1	6.61905e-13	0.669995	0.885	0.88	2.03437e-08	SEMA3G+	BTG1
RAPGEF3	7.58892e-13	0.808793	0.662	0.537	2.33245e-08	SEMA3G+	RAPGEF3
RFTN1	1.71851e-12	1.34034	0.476	0.322	5.28185e-08	SEMA3G+	RFTN1
DEPP1	2.04514e-12	0.557561	0.829	0.708	6.28574e-08	SEMA3G+	DEPP1
STMN1	2.41438e-12	1.32264	0.545	0.417	7.42059e-08	SEMA3G+	STMN1
TINAGL1	2.56834e-12	0.773967	0.739	0.698	7.89379e-08	SEMA3G+	TINAGL1
ACACB	2.69527e-12	0.93248	0.578	0.415	8.2839e-08	SEMA3G+	ACACB
MAP4	2.82622e-12	0.87674	0.729	0.679	8.68639e-08	SEMA3G+	MAP4
ZBTB16	3.30854e-12	0.673621	0.783	0.718	1.01688e-07	SEMA3G+	ZBTB16
CD320	3.70271e-12	1.13147	0.629	0.528	1.13803e-07	SEMA3G+	CD320
PTPRM	3.84858e-12	0.775161	0.747	0.663	1.18286e-07	SEMA3G+	PTPRM
HIP1R	3.99869e-12	1.22042	0.552	0.407	1.229e-07	SEMA3G+	HIP1R
SLFN5	4.36344e-12	1.00957	0.647	0.528	1.3411e-07	SEMA3G+	SLFN5
CD36	4.56125e-12	2.02852	0.412	0.268	1.4019e-07	SEMA3G+	CD36
APOLD1	5.98152e-12	0.884297	0.711	0.615	1.83842e-07	SEMA3G+	APOLD1
TIE1	7.65068e-12	0.835245	0.719	0.647	2.35144e-07	SEMA3G+	TIE1
CD931	9.03281e-12	0.560105	0.854	0.725	2.77623e-07	SEMA3G+	CD93
CAPN2	1.13038e-11	0.708852	0.685	0.608	3.47424e-07	SEMA3G+	CAPN2
ATP5PF	1.16627e-11	0.618386	0.752	0.707	3.58453e-07	SEMA3G+	ATP5PF
MXD4	1.30736e-11	0.900534	0.619	0.519	4.01817e-07	SEMA3G+	MXD4
IFI44L	1.64722e-11	1.44454	0.514	0.373	5.06274e-07	SEMA3G+	IFI44L
CASKIN2	1.75857e-11	1.03606	0.54	0.414	5.40496e-07	SEMA3G+	CASKIN2
SNHG7	1.96696e-11	0.56578	0.852	0.815	6.04544e-07	SEMA3G+	SNHG7
MEF2C	2.36873e-11	0.529211	0.801	0.77	7.2803e-07	SEMA3G+	MEF2C
PSMB9	2.48873e-11	0.916069	0.624	0.52	7.64911e-07	SEMA3G+	PSMB9
IFIT3	2.93491e-11	1.6295	0.427	0.287	9.02044e-07	SEMA3G+	IFIT3
DST	4.26478e-11	0.916397	0.742	0.693	1.31078e-06	SEMA3G+	DST
PPP1R14A	4.88458e-11	0.825989	0.463	0.294	1.50128e-06	SEMA3G+	PPP1R14A
RASIP1	5.03476e-11	0.843891	0.675	0.566	1.54743e-06	SEMA3G+	RASIP1
RNF125	5.49066e-11	1.21485	0.499	0.367	1.68755e-06	SEMA3G+	RNF125
MX1	5.83995e-11	1.46241	0.514	0.382	1.79491e-06	SEMA3G+	MX1
IRF9	6.06599e-11	1.04879	0.545	0.419	1.86438e-06	SEMA3G+	IRF9
MEF2A	6.9641e-11	0.612893	0.767	0.715	2.14042e-06	SEMA3G+	MEF2A
GPX3	7.13474e-11	0.90638	0.547	0.405	2.19286e-06	SEMA3G+	GPX3
TMEM881	8.03299e-11	0.949843	0.591	0.486	2.46894e-06	SEMA3G+	TMEM88
RAPGEF1	8.61028e-11	1.09965	0.545	0.435	2.64637e-06	SEMA3G+	RAPGEF1
PICALM	9.24992e-11	0.558745	0.716	0.654	2.84296e-06	SEMA3G+	PICALM
KCTD12	9.52404e-11	0.721358	0.836	0.809	2.92721e-06	SEMA3G+	KCTD12
EFCAB14	1.01876e-10	0.972225	0.619	0.545	3.13116e-06	SEMA3G+	EFCAB14
CTSH	1.89341e-10	0.807903	0.56	0.416	5.81939e-06	SEMA3G+	CTSH
AFDN	2.26713e-10	0.714736	0.711	0.657	6.96804e-06	SEMA3G+	AFDN
EFNB2	2.39149e-10	0.766937	0.691	0.604	7.35024e-06	SEMA3G+	EFNB2
LPAR6	2.60643e-10	0.986965	0.611	0.496	8.01087e-06	SEMA3G+	LPAR6
USHBP1	2.81054e-10	1.21249	0.412	0.26	8.63821e-06	SEMA3G+	USHBP1
GIMAP7	3.25786e-10	0.671708	0.772	0.743	1.0013e-05	SEMA3G+	GIMAP7
HBEGF	4.42988e-10	1.13889	0.545	0.421	1.36152e-05	SEMA3G+	HBEGF
LGALS1	5.36542e-10	0.617203	0.824	0.813	1.64906e-05	SEMA3G+	LGALS1
PKN3	5.67353e-10	1.4315	0.425	0.297	1.74376e-05	SEMA3G+	PKN3
GIMAP1	2.44168e-09	0.827798	0.662	0.604	7.5045e-05	SEMA3G+	GIMAP1
AGPAT1	2.73092e-09	1.33236	0.412	0.287	8.39349e-05	SEMA3G+	AGPAT1
MT1E	2.75505e-09	1.00233	0.471	0.348	8.46764e-05	SEMA3G+	MT1E
BCL6B	2.77642e-09	1.18133	0.407	0.28	8.53334e-05	SEMA3G+	BCL6B
JCAD	4.19248e-09	0.710965	0.662	0.569	0.000128856	SEMA3G+	JCAD
TM4SF18	5.7873e-09	1.07864	0.499	0.385	0.000177873	SEMA3G+	TM4SF18
ISG15	6.33409e-09	1.54466	0.512	0.415	0.000194678	SEMA3G+	ISG15
TNFSF10	1.04748e-08	0.640203	0.765	0.722	0.000321944	SEMA3G+	TNFSF10
APOL3	1.2133e-08	1.04468	0.545	0.443	0.000372909	SEMA3G+	APOL3
RRAS	1.32265e-08	0.91895	0.614	0.563	0.000406516	SEMA3G+	RRAS
GYPC	1.47402e-08	0.579041	0.478	0.346	0.000453041	SEMA3G+	GYPC
IFI27L2	1.54115e-08	1.09224	0.432	0.322	0.000473672	SEMA3G+	IFI27L2
DOCK9	1.65281e-08	0.630986	0.78	0.739	0.000507992	SEMA3G+	DOCK9
GRASP	1.6531e-08	0.523967	0.77	0.732	0.000508079	SEMA3G+	GRASP
FDPS	2.18831e-08	0.579819	0.675	0.625	0.000672578	SEMA3G+	FDPS
JAG1	2.9664e-08	1.50387	0.565	0.517	0.000911723	SEMA3G+	JAG1
TAF1C	3.05859e-08	1.10095	0.43	0.306	0.000940057	SEMA3G+	TAF1C
ADM	3.75514e-08	1.0331	0.455	0.346	0.00115414	SEMA3G+	ADM
TMEM184B	4.3085e-08	1.27246	0.404	0.288	0.00132422	SEMA3G+	TMEM184B
CDKN1C	4.42757e-08	1.19937	0.542	0.447	0.00136081	SEMA3G+	CDKN1C
HSPA1B	5.22766e-08	0.671497	0.747	0.666	0.00160672	SEMA3G+	HSPA1B
CDC42EP31	5.29404e-08	0.620434	0.714	0.612	0.00162712	SEMA3G+	CDC42EP3
SH2D3C	5.40834e-08	1.05888	0.417	0.299	0.00166225	SEMA3G+	SH2D3C
ARHGEF15	5.94737e-08	0.923059	0.519	0.415	0.00182793	SEMA3G+	ARHGEF15
ERC1	5.94963e-08	0.919146	0.54	0.438	0.00182862	SEMA3G+	ERC1
GLUL	7.39444e-08	0.970817	0.696	0.657	0.00227268	SEMA3G+	GLUL
COL4A1	9.91721e-08	0.958791	0.719	0.664	0.00304805	SEMA3G+	COL4A1
LRCH1	1.16178e-07	0.72657	0.453	0.321	0.00357074	SEMA3G+	LRCH1
CFAP36	1.2593e-07	1.12432	0.56	0.493	0.00387045	SEMA3G+	CFAP36
MOB2	1.29164e-07	0.801208	0.586	0.501	0.00396985	SEMA3G+	MOB2
HLA-F	1.45114e-07	0.712921	0.606	0.53	0.00446007	SEMA3G+	HLA-F
RGS3	1.87202e-07	1.05222	0.486	0.398	0.00575364	SEMA3G+	RGS3
PLAT1	1.87955e-07	0.659326	0.616	0.517	0.00577679	SEMA3G+	PLAT
KDR	2.05922e-07	0.857746	0.527	0.423	0.00632902	SEMA3G+	KDR
PLK2	2.78041e-07	0.704108	0.616	0.514	0.00854558	SEMA3G+	PLK2
JUP	3.35857e-07	0.679247	0.404	0.275	0.0103226	SEMA3G+	JUP
CDC42BPA	3.84621e-07	0.742441	0.645	0.591	0.0118213	SEMA3G+	CDC42BPA
ADRB2	3.93036e-07	0.708193	0.407	0.287	0.01208	SEMA3G+	ADRB2
MYO5C	4.10238e-07	0.81278	0.547	0.464	0.0126087	SEMA3G+	MYO5C
CPNE2	4.21668e-07	0.941278	0.453	0.357	0.01296	SEMA3G+	CPNE2
PTPRG	5.53009e-07	0.684768	0.555	0.441	0.0169967	SEMA3G+	PTPRG
EPHA4	5.91428e-07	0.749737	0.588	0.508	0.0181775	SEMA3G+	EPHA4
FXYD6	5.92056e-07	0.520265	0.402	0.272	0.0181969	SEMA3G+	FXYD6
COL15A11	5.93738e-07	0.915185	0.547	0.457	0.0182485	SEMA3G+	COL15A1
KRT10	1.02831e-06	0.711964	0.619	0.549	0.0316052	SEMA3G+	KRT10
LDLR	1.24094e-06	0.805437	0.506	0.41	0.0381402	SEMA3G+	LDLR
SULF2	1.38378e-06	0.612148	0.688	0.645	0.0425305	SEMA3G+	SULF2
THBD	1.38717e-06	0.669633	0.721	0.705	0.0426346	SEMA3G+	THBD
LY6E	1.68664e-06	0.54476	0.724	0.683	0.051839	SEMA3G+	LY6E
WARS	1.72881e-06	0.818461	0.563	0.517	0.0531351	SEMA3G+	WARS
GALNT15	1.81158e-06	0.846934	0.552	0.474	0.0556788	SEMA3G+	GALNT15
KANK3	1.89713e-06	0.681496	0.542	0.457	0.0583084	SEMA3G+	KANK3
CDC42EP1	1.92708e-06	1.00721	0.427	0.331	0.0592288	SEMA3G+	CDC42EP1
PRMT1	2.14058e-06	0.662221	0.609	0.551	0.0657908	SEMA3G+	PRMT1
MXRA7	2.48223e-06	0.581216	0.637	0.562	0.0762914	SEMA3G+	MXRA7
APOD	3.07032e-06	1.04565	0.499	0.406	0.0943664	SEMA3G+	APOD
HERPUD1	3.24119e-06	0.718625	0.627	0.571	0.0996179	SEMA3G+	HERPUD1
KLHL5	3.63633e-06	0.689504	0.455	0.358	0.111763	SEMA3G+	KLHL5
ETS1	3.80073e-06	0.660599	0.675	0.651	0.116815	SEMA3G+	ETS1
PFDN1	4.11689e-06	0.753967	0.568	0.508	0.126533	SEMA3G+	PFDN1
STK38L	4.24125e-06	0.844813	0.506	0.425	0.130355	SEMA3G+	STK38L
CRIP1	4.601e-06	0.74676	0.598	0.523	0.141412	SEMA3G+	CRIP1
HPCAL1	5.33809e-06	0.890452	0.499	0.424	0.164066	SEMA3G+	HPCAL1
ANKH	6.47425e-06	0.907091	0.43	0.343	0.198986	SEMA3G+	ANKH
HIF3A	6.6984e-06	0.705646	0.593	0.526	0.205875	SEMA3G+	HIF3A
GALNT18	6.97764e-06	0.872439	0.465	0.375	0.214458	SEMA3G+	GALNT18
CNDP2	7.63297e-06	0.892331	0.465	0.365	0.234599	SEMA3G+	CNDP2
PXDN	8.28253e-06	0.807793	0.425	0.332	0.254563	SEMA3G+	PXDN
SHE	9.29169e-06	0.568877	0.639	0.571	0.28558	SEMA3G+	SHE
VPS37B	9.77811e-06	0.81682	0.465	0.376	0.30053	SEMA3G+	VPS37B
HOXB7	1.04391e-05	0.821835	0.427	0.335	0.320846	SEMA3G+	HOXB7
ASRGL1	1.18435e-05	1.00658	0.417	0.334	0.364009	SEMA3G+	ASRGL1
H1FX	1.32304e-05	0.55489	0.693	0.698	0.406637	SEMA3G+	H1FX
IKBKB	1.35366e-05	0.692077	0.504	0.414	0.416046	SEMA3G+	IKBKB
DGKE	1.46533e-05	0.669826	0.501	0.407	0.450368	SEMA3G+	DGKE
MAP3K11	1.78485e-05	0.511147	0.642	0.598	0.548573	SEMA3G+	MAP3K11
NQO1	2.027e-05	0.584013	0.465	0.368	0.622997	SEMA3G+	NQO1
EPS8	2.0408e-05	0.513538	0.632	0.565	0.627239	SEMA3G+	EPS8
MT1M	2.08807e-05	0.648987	0.427	0.326	0.641769	SEMA3G+	MT1M
CALCOCO2	2.48741e-05	0.605815	0.698	0.691	0.764507	SEMA3G+	CALCOCO2
DIPK1B	2.9768e-05	0.749334	0.558	0.479	0.914919	SEMA3G+	DIPK1B
DHRS3	3.41517e-05	0.602167	0.512	0.437	1	SEMA3G+	DHRS3
S1PR1	3.56274e-05	0.556686	0.726	0.702	1	SEMA3G+	S1PR1
MEOX11	3.62139e-05	0.546804	0.494	0.388	1	SEMA3G+	MEOX1
MAPK3	3.83222e-05	0.598523	0.601	0.558	1	SEMA3G+	MAPK3
SMARCA2	3.97083e-05	0.759865	0.609	0.586	1	SEMA3G+	SMARCA2
COL4A2	4.54328e-05	0.54176	0.726	0.676	1	SEMA3G+	COL4A2
PKIG	5.10389e-05	0.688792	0.537	0.489	1	SEMA3G+	PKIG
GPRC5B	6.48527e-05	0.774425	0.458	0.395	1	SEMA3G+	GPRC5B
NUDT14	7.62732e-05	0.769671	0.435	0.353	1	SEMA3G+	NUDT14
TLE5	7.90257e-05	0.54095	0.693	0.691	1	SEMA3G+	TLE5
STX12	9.77999e-05	0.66454	0.532	0.473	1	SEMA3G+	STX12
DOCK6	0.000107903	0.883833	0.43	0.348	1	SEMA3G+	DOCK6
TMEM204	0.00011541	0.960284	0.537	0.519	1	SEMA3G+	TMEM204
AMD1	0.000119458	0.732501	0.565	0.512	1	SEMA3G+	AMD1
IFNAR1	0.000144008	0.680465	0.598	0.551	1	SEMA3G+	IFNAR1
FYN	0.00014693	0.724947	0.504	0.438	1	SEMA3G+	FYN
RNF19A	0.000147462	0.63634	0.588	0.552	1	SEMA3G+	RNF19A
PLK3	0.000159926	0.837387	0.445	0.372	1	SEMA3G+	PLK3
MRPL33	0.000177802	0.534756	0.614	0.609	1	SEMA3G+	MRPL33
TSPAN18	0.000187232	0.646332	0.506	0.433	1	SEMA3G+	TSPAN18
ABLIM3	0.000196604	0.96175	0.481	0.431	1	SEMA3G+	ABLIM3
ADAR	0.000201167	0.516247	0.619	0.57	1	SEMA3G+	ADAR
ABHD17A	0.000216713	0.522495	0.57	0.551	1	SEMA3G+	ABHD17A
TUBA1A	0.000217378	0.78937	0.586	0.571	1	SEMA3G+	TUBA1A
PPP1R10	0.000222208	0.634887	0.573	0.525	1	SEMA3G+	PPP1R10
MAP7D1	0.000226499	0.621829	0.481	0.401	1	SEMA3G+	MAP7D1
SLFN11	0.000240594	0.764836	0.419	0.345	1	SEMA3G+	SLFN11
TAOK2	0.000250951	0.640405	0.488	0.417	1	SEMA3G+	TAOK2
MECOM	0.000284567	0.562334	0.657	0.608	1	SEMA3G+	MECOM
NDUFA12	0.000296188	0.599995	0.591	0.569	1	SEMA3G+	NDUFA12
CMTM8	0.000335293	0.737203	0.478	0.421	1	SEMA3G+	CMTM8
PPP2R2A	0.000374267	0.50163	0.593	0.554	1	SEMA3G+	PPP2R2A
GIMAP8	0.000489545	0.740569	0.591	0.554	1	SEMA3G+	GIMAP8
BCL2L1	0.000491872	0.683407	0.501	0.453	1	SEMA3G+	BCL2L1
TCN2	0.000557319	0.651368	0.535	0.484	1	SEMA3G+	TCN2
VAT1	0.0005699	0.573965	0.563	0.532	1	SEMA3G+	VAT1
TAP2	0.000580342	0.967586	0.432	0.371	1	SEMA3G+	TAP2
RRAGA	0.000592538	0.668028	0.473	0.423	1	SEMA3G+	RRAGA
RIN2	0.000651643	0.544077	0.499	0.45	1	SEMA3G+	RIN2
COBLL1	0.000651818	0.660648	0.522	0.466	1	SEMA3G+	COBLL1
EFNA1	0.000762068	0.557516	0.581	0.551	1	SEMA3G+	EFNA1
NOVA2	0.000802168	0.721409	0.468	0.404	1	SEMA3G+	NOVA2
FAM214A	0.000815837	0.734988	0.422	0.365	1	SEMA3G+	FAM214A
RBM22	0.00096219	0.553057	0.499	0.458	1	SEMA3G+	RBM22
ACVRL1	0.000994941	0.509023	0.627	0.599	1	SEMA3G+	ACVRL1
MYO1E	0.00115515	0.729903	0.46	0.398	1	SEMA3G+	MYO1E
ARL2BP	0.0011571	0.77381	0.517	0.478	1	SEMA3G+	ARL2BP
WDFY1	0.0011772	0.751783	0.419	0.358	1	SEMA3G+	WDFY1
DAB2IP	0.00121873	0.852218	0.425	0.367	1	SEMA3G+	DAB2IP
ARID4A	0.0012765	0.50583	0.514	0.472	1	SEMA3G+	ARID4A
PLEKHG11	0.00134936	0.539011	0.54	0.494	1	SEMA3G+	PLEKHG1
ORAI1	0.00147142	0.955252	0.44	0.392	1	SEMA3G+	ORAI1
ANKRD29	0.00147582	0.675945	0.56	0.514	1	SEMA3G+	ANKRD29
APBB2	0.00156324	0.551447	0.519	0.457	1	SEMA3G+	APBB2
IFNAR2	0.00180082	0.556235	0.483	0.429	1	SEMA3G+	IFNAR2
ATP1B3	0.00181143	0.507629	0.675	0.671	1	SEMA3G+	ATP1B3
GPR146	0.00184808	0.719345	0.491	0.455	1	SEMA3G+	GPR146
STAT1	0.00185621	0.724322	0.448	0.389	1	SEMA3G+	STAT1
OFD1	0.00187723	0.899799	0.425	0.362	1	SEMA3G+	OFD1
NCK1	0.00189254	0.535781	0.537	0.498	1	SEMA3G+	NCK1
RIT1	0.00201457	0.72816	0.43	0.375	1	SEMA3G+	RIT1
CEBPG	0.00205537	0.661557	0.432	0.377	1	SEMA3G+	CEBPG
PELI1	0.00206785	0.550519	0.527	0.498	1	SEMA3G+	PELI1
TMEM109	0.00211166	0.522844	0.575	0.549	1	SEMA3G+	TMEM109
PRKAR2A	0.00212158	0.653147	0.483	0.425	1	SEMA3G+	PRKAR2A
TCF7L1	0.00218206	0.554362	0.414	0.346	1	SEMA3G+	TCF7L1
ARHGEF2	0.00220289	0.920949	0.437	0.386	1	SEMA3G+	ARHGEF2
DGKZ	0.00238093	0.767597	0.412	0.352	1	SEMA3G+	DGKZ
C8orf33	0.00241518	0.804971	0.419	0.367	1	SEMA3G+	C8orf33
TEK	0.00246572	0.507518	0.555	0.514	1	SEMA3G+	TEK
TMEM2731	0.00256401	0.621609	0.504	0.44	1	SEMA3G+	TMEM273
C1orf115	0.00266169	0.70668	0.442	0.396	1	SEMA3G+	C1orf115
SHISA5	0.00285161	0.675631	0.542	0.507	1	SEMA3G+	SHISA5
PCNX1	0.00314272	0.56546	0.45	0.381	1	SEMA3G+	PCNX1
PKN1	0.00315885	0.54535	0.537	0.503	1	SEMA3G+	PKN1
KIAA1671	0.00330882	0.525443	0.435	0.379	1	SEMA3G+	KIAA1671
LEPROTL1	0.00363556	0.660126	0.412	0.36	1	SEMA3G+	LEPROTL1
MAGI1	0.00459892	0.598372	0.504	0.463	1	SEMA3G+	MAGI1
CNOT6L	0.00509906	0.547521	0.583	0.58	1	SEMA3G+	CNOT6L
SENP7	0.00554288	0.567144	0.44	0.379	1	SEMA3G+	SENP7
FRYL	0.0057787	0.563331	0.632	0.637	1	SEMA3G+	FRYL
CCNY	0.00612709	0.742248	0.506	0.488	1	SEMA3G+	CCNY
F11R	0.00655636	0.539765	0.563	0.539	1	SEMA3G+	F11R
GBP1	0.00686196	0.747863	0.414	0.365	1	SEMA3G+	GBP1
UBE2L6	0.00701084	0.726374	0.417	0.371	1	SEMA3G+	UBE2L6
TNKS1BP1	0.00750445	0.730864	0.402	0.353	1	SEMA3G+	TNKS1BP1
TMEM44	0.00932978	0.680413	0.422	0.378	1	SEMA3G+	TMEM44
ITLN1	2.7651e-272	9.83453	0.861	0.012	8.49853e-268	ITLN1+	ITLN1
F5	2.64684e-189	8.90583	0.618	0.007	8.13505e-185	ITLN1+	F5
OGN	1.6353e-176	7.5205	0.722	0.049	5.02609e-172	ITLN1+	OGN
PDE3A	1.15146e-168	6.57501	0.625	0.022	3.539e-164	ITLN1+	PDE3A
OMD	5.58213e-167	5.65528	0.749	0.069	1.71567e-162	ITLN1+	OMD
DKK2	9.60571e-153	6.06068	0.533	0.01	2.95231e-148	ITLN1+	DKK2
WIPF3	4.02352e-127	4.47341	0.51	0.021	1.23663e-122	ITLN1+	WIPF3
SULF1	1.74709e-126	3.89937	0.923	0.314	5.36968e-122	ITLN1+	SULF1
SLPI	7.04252e-122	5.90057	0.687	0.108	2.16452e-117	ITLN1+	SLPI
IGFBP31	4.01947e-121	3.29519	0.954	0.345	1.23538e-116	ITLN1+	IGFBP3
PRELP	4.46158e-114	3.97994	0.699	0.114	1.37127e-109	ITLN1+	PRELP
HMCN1	2.21619e-108	3.68854	0.734	0.152	6.81145e-104	ITLN1+	HMCN1
COL8A1	5.39378e-108	3.71251	0.857	0.296	1.65778e-103	ITLN1+	COL8A1
IRF6	1.30857e-104	4.53641	0.459	0.026	4.02188e-100	ITLN1+	IRF6
GRB14	1.32609e-104	4.15435	0.514	0.042	4.07573e-100	ITLN1+	GRB14
PTGIS	5.24025e-102	3.02738	0.88	0.315	1.61059e-97	ITLN1+	PTGIS
GDF7	1.14689e-101	4.53542	0.502	0.042	3.52495e-97	ITLN1+	GDF7
HEY2	1.07988e-99	4.04175	0.529	0.054	3.31901e-95	ITLN1+	HEY2
GJA5	8.12801e-99	2.96379	0.591	0.071	2.49814e-94	ITLN1+	GJA5
FBLIM1	3.3379e-98	2.80204	0.772	0.183	1.0259e-93	ITLN1+	FBLIM1
AC084740.1	3.87865e-98	5.45126	0.409	0.019	1.1921e-93	ITLN1+	AC084740.1
ABI3BP	3.43051e-97	3.47847	0.695	0.141	1.05437e-92	ITLN1+	ABI3BP
TPM2	2.2558e-95	2.56019	0.981	0.51	6.9332e-91	ITLN1+	TPM2
AR	6.33506e-94	4.09383	0.533	0.063	1.94708e-89	ITLN1+	AR
MGP	2.07292e-92	2.31656	1	0.913	6.37112e-88	ITLN1+	MGP
BGN	2.06304e-88	2.92167	0.849	0.344	6.34077e-84	ITLN1+	BGN
MYH11	1.89954e-86	2.6749	0.78	0.199	5.83824e-82	ITLN1+	MYH11
PDGFD	7.76491e-85	3.56717	0.649	0.147	2.38655e-80	ITLN1+	PDGFD
RHOB	2.57392e-82	2.03571	0.961	0.78	7.91096e-78	ITLN1+	RHOB
SELL	2.42374e-80	5.06787	0.421	0.041	7.44936e-76	ITLN1+	SELL
FN1	6.66425e-78	2.23333	0.95	0.591	2.04826e-73	ITLN1+	FN1
SETBP1	5.62835e-77	3.38195	0.56	0.1	1.72987e-72	ITLN1+	SETBP1
PPP1CB	3.82267e-76	2.80633	0.884	0.591	1.1749e-71	ITLN1+	PPP1CB
ACTA2	4.26308e-76	2.60662	0.884	0.4	1.31026e-71	ITLN1+	ACTA2
BMP6	7.21308e-75	2.97797	0.788	0.313	2.21694e-70	ITLN1+	BMP6
NCAM1	1.59547e-74	4.43542	0.402	0.04	4.90369e-70	ITLN1+	NCAM1
TBX1	7.08817e-74	2.79011	0.633	0.147	2.17855e-69	ITLN1+	TBX1
MEIS2	1.36236e-72	3.44751	0.568	0.118	4.1872e-68	ITLN1+	MEIS2
PTPRJ	3.20195e-72	3.99013	0.402	0.042	9.8412e-68	ITLN1+	PTPRJ
CDH11	8.26892e-72	3.16411	0.645	0.171	2.54145e-67	ITLN1+	CDH11
ITPR2	3.49736e-69	2.27345	0.927	0.583	1.07491e-64	ITLN1+	ITPR2
MUSTN1	4.91435e-69	2.84152	0.614	0.14	1.51042e-64	ITLN1+	MUSTN1
DKK3	1.64978e-68	2.98222	0.602	0.147	5.07059e-64	ITLN1+	DKK3
KCNMB4	5.4855e-68	4.22241	0.432	0.062	1.68597e-63	ITLN1+	KCNMB4
GAS6	5.22442e-67	2.20343	0.865	0.552	1.60573e-62	ITLN1+	GAS6
TAGLN	2.73774e-66	1.76414	0.992	0.778	8.41446e-62	ITLN1+	TAGLN
EFEMP1	3.08636e-65	1.52547	0.803	0.265	9.48594e-61	ITLN1+	EFEMP1
LTBP4	4.83836e-65	2.5644	0.772	0.335	1.48707e-60	ITLN1+	LTBP4
TMEM98	9.04714e-64	3.16702	0.456	0.075	2.78064e-59	ITLN1+	TMEM98
TMEM120A	4.06055e-63	3.08452	0.687	0.257	1.24801e-58	ITLN1+	TMEM120A
ELN	7.34922e-62	3.1565	0.795	0.406	2.25878e-57	ITLN1+	ELN
LTBP2	9.44886e-62	3.20397	0.575	0.149	2.90411e-57	ITLN1+	LTBP2
BTG2	9.57043e-61	2.19144	0.911	0.758	2.94147e-56	ITLN1+	BTG2
EDN1	2.88873e-60	2.55671	0.846	0.454	8.87851e-56	ITLN1+	EDN1
TSC22D3	3.4573e-60	1.84889	0.903	0.686	1.0626e-55	ITLN1+	TSC22D3
CLU	1.10915e-58	0.996266	0.973	0.778	3.40897e-54	ITLN1+	CLU
DUSP1	7.47068e-55	1.49053	0.95	0.888	2.29611e-50	ITLN1+	DUSP1
BMX	3.95573e-54	2.15218	0.815	0.468	1.21579e-49	ITLN1+	BMX
LAMA2	4.41715e-54	2.90642	0.417	0.071	1.35761e-49	ITLN1+	LAMA2
GATA6	4.89971e-54	2.98529	0.618	0.214	1.50593e-49	ITLN1+	GATA6
RGS5	4.42067e-53	1.92183	0.602	0.166	1.35869e-48	ITLN1+	RGS5
GPRC5A	8.28019e-51	3.22482	0.606	0.226	2.54492e-46	ITLN1+	GPRC5A
SERPINE1	1.96949e-49	2.00748	0.869	0.539	6.05322e-45	ITLN1+	SERPINE1
GUCY1A1	2.22263e-49	2.38917	0.533	0.143	6.83127e-45	ITLN1+	GUCY1A1
SGCE	3.55451e-49	2.40034	0.548	0.156	1.09248e-44	ITLN1+	SGCE
NR4A1	4.3052e-49	2.38487	0.803	0.499	1.3232e-44	ITLN1+	NR4A1
CNN1	1.00025e-48	2.48255	0.471	0.107	3.07426e-44	ITLN1+	CNN1
ALDH1A1	1.51741e-48	2.87762	0.452	0.105	4.66375e-44	ITLN1+	ALDH1A1
CDH13	1.54363e-48	1.97045	0.792	0.444	4.74436e-44	ITLN1+	CDH13
PTGS2	1.67247e-48	2.72334	0.625	0.231	5.14033e-44	ITLN1+	PTGS2
CPE	6.74052e-48	2.13077	0.614	0.203	2.0717e-43	ITLN1+	CPE
NFIA	7.56993e-48	1.55028	0.931	0.769	2.32662e-43	ITLN1+	NFIA
ALDH3A2	5.16103e-47	2.81181	0.629	0.248	1.58624e-42	ITLN1+	ALDH3A2
CKB	7.4941e-47	2.6884	0.452	0.106	2.30331e-42	ITLN1+	CKB
CRYAB	3.89724e-46	2.33216	0.602	0.209	1.19782e-41	ITLN1+	CRYAB
EXT1	2.51253e-45	2.45038	0.664	0.302	7.72226e-41	ITLN1+	EXT1
CREB5	2.56066e-45	2.51082	0.556	0.182	7.8702e-41	ITLN1+	CREB5
CRIM1	6.50176e-45	1.54708	0.931	0.769	1.99831e-40	ITLN1+	CRIM1
MYL9	1.67567e-44	1.52713	0.919	0.626	5.15018e-40	ITLN1+	MYL9
RBP1	2.11426e-44	2.74617	0.459	0.12	6.49819e-40	ITLN1+	RBP1
SELP	2.77747e-44	2.26709	0.683	0.343	8.53657e-40	ITLN1+	SELP
SELENOM	1.21724e-43	1.49182	0.846	0.594	3.74119e-39	ITLN1+	SELENOM
PPP1R14A1	1.37242e-43	1.69716	0.707	0.263	4.21814e-39	ITLN1+	PPP1R14A
HSD17B12	1.42008e-43	1.67724	0.853	0.641	4.36461e-39	ITLN1+	HSD17B12
FAM107B	7.51293e-43	2.04284	0.653	0.293	2.3091e-38	ITLN1+	FAM107B
ACTG2	9.68071e-43	2.41737	0.544	0.173	2.97537e-38	ITLN1+	ACTG2
SRPX	2.33024e-42	2.35062	0.66	0.304	7.16199e-38	ITLN1+	SRPX
C1R	2.76953e-42	2.10201	0.68	0.337	8.51216e-38	ITLN1+	C1R
DES	4.45357e-42	2.24024	0.544	0.174	1.36881e-37	ITLN1+	DES
SYNPO2	5.1138e-42	2.23328	0.483	0.132	1.57173e-37	ITLN1+	SYNPO2
DSTN	2.047e-41	0.984923	0.973	0.897	6.29146e-37	ITLN1+	DSTN
WSB1	2.16074e-41	1.32578	0.95	0.827	6.64103e-37	ITLN1+	WSB1
MFGE8	3.82309e-41	2.00068	0.718	0.376	1.17503e-36	ITLN1+	MFGE8
CCDC80	2.08614e-40	1.96516	0.691	0.324	6.41175e-36	ITLN1+	CCDC80
FHL1	1.63735e-39	1.94743	0.664	0.313	5.03241e-35	ITLN1+	FHL1
GASK1B	2.17012e-39	1.71604	0.811	0.547	6.66986e-35	ITLN1+	GASK1B
FBLN5	2.67215e-39	1.99388	0.444	0.114	8.21284e-35	ITLN1+	FBLN5
TSPAN2	7.31856e-39	1.93219	0.556	0.205	2.24936e-34	ITLN1+	TSPAN2
DEPP11	9.83477e-39	1.43476	0.934	0.7	3.02272e-34	ITLN1+	DEPP1
ATP2A3	2.06802e-38	2.72329	0.409	0.103	6.35605e-34	ITLN1+	ATP2A3
ITGA10	3.06059e-38	2.35932	0.641	0.297	9.40671e-34	ITLN1+	ITGA10
DHRS31	4.08306e-38	1.74891	0.726	0.403	1.25493e-33	ITLN1+	DHRS3
C19orf33	5.76234e-38	1.96082	0.498	0.156	1.77105e-33	ITLN1+	C19orf33
PTPRB	1.47483e-37	1.18698	0.95	0.814	4.53289e-33	ITLN1+	PTPRB
AAK1	3.3273e-37	1.59136	0.869	0.606	1.02265e-32	ITLN1+	AAK1
FTH1	6.94452e-37	0.790979	0.996	0.993	2.1344e-32	ITLN1+	FTH1
PDLIM3	2.50075e-36	2.45711	0.672	0.348	7.68604e-32	ITLN1+	PDLIM3
SMAD6	7.11874e-36	2.03526	0.598	0.259	2.18795e-31	ITLN1+	SMAD6
ATP10D	2.60396e-34	1.99265	0.645	0.317	8.00326e-30	ITLN1+	ATP10D
PXDC1	2.82699e-34	1.83999	0.714	0.447	8.68876e-30	ITLN1+	PXDC1
TXNRD2	5.88685e-34	2.63753	0.44	0.146	1.80932e-29	ITLN1+	TXNRD2
FNIP2	6.72777e-34	1.70272	0.776	0.543	2.06778e-29	ITLN1+	FNIP2
FOS	7.55178e-34	1.27601	0.965	0.864	2.32104e-29	ITLN1+	FOS
THBS1	1.33259e-33	1.70679	0.656	0.333	4.09571e-29	ITLN1+	THBS1
MPZL2	1.45008e-33	1.45971	0.811	0.538	4.45681e-29	ITLN1+	MPZL2
PLEKHH3	7.21178e-33	2.61528	0.475	0.172	2.21654e-28	ITLN1+	PLEKHH3
CSRP1	2.16207e-32	1.49019	0.807	0.571	6.64511e-28	ITLN1+	CSRP1
ARL6IP1	3.41171e-32	1.62998	0.819	0.733	1.04859e-27	ITLN1+	ARL6IP1
BMP4	3.72407e-32	2.0387	0.541	0.224	1.14459e-27	ITLN1+	BMP4
LIMCH1	6.26363e-32	1.92749	0.691	0.401	1.92513e-27	ITLN1+	LIMCH1
FILIP11	8.24334e-32	1.57493	0.714	0.404	2.53359e-27	ITLN1+	FILIP1
RBMS3	3.96521e-31	1.79798	0.745	0.515	1.21871e-26	ITLN1+	RBMS3
MEDAG	5.58375e-31	2.25104	0.467	0.17	1.71616e-26	ITLN1+	MEDAG
CFH	7.51615e-31	1.09049	0.772	0.457	2.31009e-26	ITLN1+	CFH
C1S	1.49474e-30	2.15824	0.494	0.197	4.59407e-26	ITLN1+	C1S
ZFP36	1.52957e-30	1.21903	0.915	0.816	4.70114e-26	ITLN1+	ZFP36
TMOD1	1.12311e-29	1.86172	0.502	0.191	3.45187e-25	ITLN1+	TMOD1
PLXNA2	3.5228e-29	1.86356	0.707	0.445	1.08273e-24	ITLN1+	PLXNA2
FGF2	3.7813e-29	1.65137	0.633	0.308	1.16218e-24	ITLN1+	FGF2
TGM2	4.82638e-29	1.15775	0.869	0.644	1.48339e-24	ITLN1+	TGM2
CALD1	1.01795e-28	0.838654	0.934	0.847	3.12866e-24	ITLN1+	CALD1
FGL2	1.0599e-28	1.54918	0.552	0.234	3.25761e-24	ITLN1+	FGL2
ANXA3	1.55921e-28	1.7858	0.541	0.234	4.79225e-24	ITLN1+	ANXA3
PLA2R1	8.07912e-28	2.15928	0.444	0.16	2.48312e-23	ITLN1+	PLA2R1
TMX4	1.13917e-27	1.796	0.68	0.424	3.50124e-23	ITLN1+	TMX4
LTC4S	1.26485e-27	1.51307	0.737	0.534	3.88752e-23	ITLN1+	LTC4S
PMEPA1	2.5845e-27	1.78708	0.591	0.315	7.94346e-23	ITLN1+	PMEPA1
MALAT1	5.55767e-27	0.801175	1	1	1.70815e-22	ITLN1+	MALAT1
IGF1R	2.06375e-26	1.42409	0.718	0.454	6.34294e-22	ITLN1+	IGF1R
MTRNR2L12	3.13293e-26	0.817294	0.973	0.938	9.62905e-22	ITLN1+	MTRNR2L12
EFNB21	3.34681e-26	1.10518	0.803	0.591	1.02864e-21	ITLN1+	EFNB2
SKIL	4.02328e-26	1.2519	0.807	0.622	1.23656e-21	ITLN1+	SKIL
FOSB	4.78166e-26	1.49657	0.83	0.659	1.46964e-21	ITLN1+	FOSB
CYBRD1	5.22105e-26	1.70297	0.641	0.378	1.60469e-21	ITLN1+	CYBRD1
MTUS1	5.58471e-26	0.931639	0.911	0.856	1.71646e-21	ITLN1+	MTUS1
PTPRG1	8.19972e-26	1.52101	0.703	0.424	2.52018e-21	ITLN1+	PTPRG
IDS	1.26015e-25	1.60969	0.683	0.436	3.87306e-21	ITLN1+	IDS
NOVA1	2.34171e-25	1.93995	0.436	0.167	7.19724e-21	ITLN1+	NOVA1
JUNB	6.6287e-25	0.961531	0.954	0.924	2.03733e-20	ITLN1+	JUNB
NEXN	2.72975e-24	1.7091	0.409	0.145	8.38987e-20	ITLN1+	NEXN
FAM118A	2.74585e-24	1.85434	0.494	0.221	8.43938e-20	ITLN1+	FAM118A
TMED7	4.53882e-24	1.6918	0.633	0.382	1.39501e-19	ITLN1+	TMED7
HSPB1	4.64071e-24	0.900916	0.958	0.927	1.42632e-19	ITLN1+	HSPB1
SRGN1	4.70231e-24	1.01188	0.853	0.791	1.44526e-19	ITLN1+	SRGN
HERC2	2.11239e-23	1.36895	0.788	0.607	6.49242e-19	ITLN1+	HERC2
ST8SIA6	2.25125e-23	1.72928	0.483	0.219	6.91922e-19	ITLN1+	ST8SIA6
KCNN3	3.21809e-23	1.71494	0.517	0.243	9.89079e-19	ITLN1+	KCNN3
EGR1	3.31032e-23	1.31851	0.799	0.613	1.01743e-18	ITLN1+	EGR1
PCDH17	4.3968e-23	1.71175	0.687	0.448	1.35136e-18	ITLN1+	PCDH17
CAVIN2	5.7083e-23	1.25925	0.853	0.787	1.75445e-18	ITLN1+	CAVIN2
NNMT	8.49124e-23	0.991459	0.869	0.744	2.60978e-18	ITLN1+	NNMT
KLF2	2.99383e-22	0.91237	0.931	0.891	9.20154e-18	ITLN1+	KLF2
SNX18	3.70052e-22	2.13646	0.459	0.205	1.13735e-17	ITLN1+	SNX18
CCN1	4.39938e-22	1.5741	0.784	0.596	1.35215e-17	ITLN1+	CCN1
JUND	4.89505e-22	0.867184	0.927	0.899	1.50449e-17	ITLN1+	JUND
CD9	1.24458e-21	0.795987	0.842	0.701	3.82521e-17	ITLN1+	CD9
LMO2	1.5674e-21	1.08691	0.799	0.693	4.81739e-17	ITLN1+	LMO2
TIPARP	4.25208e-21	1.91509	0.629	0.429	1.30688e-16	ITLN1+	TIPARP
NFIX	9.42777e-21	1.49123	0.568	0.314	2.89763e-16	ITLN1+	NFIX
ITGB5	1.3457e-20	1.65488	0.444	0.197	4.13601e-16	ITLN1+	ITGB5
SEMA3F	1.89603e-20	1.24711	0.656	0.415	5.82744e-16	ITLN1+	SEMA3F
SERPING1	6.75122e-20	1.13364	0.714	0.578	2.07499e-15	ITLN1+	SERPING1
CEBPB	1.19815e-19	1.66871	0.61	0.398	3.68252e-15	ITLN1+	CEBPB
LYST1	1.85115e-19	1.03187	0.834	0.613	5.6895e-15	ITLN1+	LYST
LTBP3	3.05794e-19	1.34091	0.676	0.481	9.39858e-15	ITLN1+	LTBP3
TLE1	3.61394e-19	1.22012	0.641	0.436	1.11074e-14	ITLN1+	TLE1
CTNNAL1	4.47707e-19	1.32202	0.695	0.543	1.37603e-14	ITLN1+	CTNNAL1
CRIP11	7.82605e-19	0.998698	0.734	0.504	2.40534e-14	ITLN1+	CRIP1
WWTR1	1.53102e-18	0.845157	0.896	0.804	4.7056e-14	ITLN1+	WWTR1
SELENOW	1.58737e-18	0.505287	0.919	0.877	4.87879e-14	ITLN1+	SELENOW
PROCR	3.64129e-18	1.72091	0.56	0.364	1.11915e-13	ITLN1+	PROCR
TOMM7	3.93749e-18	0.620005	0.876	0.838	1.21019e-13	ITLN1+	TOMM7
WLS	4.19483e-18	1.21871	0.598	0.357	1.28928e-13	ITLN1+	WLS
SEPTIN11	4.36386e-18	1.34822	0.645	0.458	1.34123e-13	ITLN1+	SEPTIN11
NIBAN1	7.09276e-18	1.56972	0.452	0.219	2.17996e-13	ITLN1+	NIBAN1
COL1A2	1.42642e-17	1.27416	0.61	0.377	4.38411e-13	ITLN1+	COL1A2
CLEC14A	1.43361e-17	0.726695	0.857	0.818	4.40619e-13	ITLN1+	CLEC14A
CYP1B1	1.57804e-17	1.12884	0.61	0.344	4.8501e-13	ITLN1+	CYP1B1
AKR1C3	2.03042e-17	1.46499	0.656	0.527	6.24049e-13	ITLN1+	AKR1C3
ARGLU1	2.34969e-17	1.01282	0.915	0.832	7.22178e-13	ITLN1+	ARGLU1
HSPG2	2.3812e-17	0.590318	0.969	0.912	7.31862e-13	ITLN1+	HSPG2
CAV11	2.58315e-17	0.513524	0.958	0.944	7.9393e-13	ITLN1+	CAV1
TANC2	4.28895e-17	1.71689	0.459	0.244	1.31821e-12	ITLN1+	TANC2
ARL5A	4.61043e-17	1.1765	0.676	0.513	1.41702e-12	ITLN1+	ARL5A
MT-ND3	4.8785e-17	0.551647	0.985	0.971	1.49941e-12	ITLN1+	MT-ND3
ARL6IP5	5.37969e-17	0.803586	0.792	0.725	1.65345e-12	ITLN1+	ARL6IP5
CCND1	6.81399e-17	1.04006	0.571	0.333	2.09428e-12	ITLN1+	CCND1
DENND3	7.43801e-17	1.58536	0.595	0.36	2.28607e-12	ITLN1+	DENND3
OAZ1	7.73849e-17	0.626844	0.846	0.786	2.37843e-12	ITLN1+	OAZ1
ADIRF	8.15326e-17	0.50897	0.973	0.886	2.5059e-12	ITLN1+	ADIRF
CAV2	9.3178e-17	0.800844	0.788	0.748	2.86383e-12	ITLN1+	CAV2
ALDH2	1.15247e-16	1.36942	0.614	0.431	3.54211e-12	ITLN1+	ALDH2
DIXDC1	1.63726e-16	1.0119	0.625	0.388	5.03212e-12	ITLN1+	DIXDC1
ARID5A	4.10752e-16	1.25539	0.649	0.439	1.26245e-11	ITLN1+	ARID5A
FOXC1	4.36297e-16	0.813365	0.834	0.724	1.34096e-11	ITLN1+	FOXC1
AAMDC	1.05301e-15	1.37122	0.587	0.414	3.23643e-11	ITLN1+	AAMDC
COBLL11	1.12451e-15	1.07385	0.66	0.445	3.45617e-11	ITLN1+	COBLL1
METRNL	2.5386e-15	0.892915	0.741	0.561	7.80238e-11	ITLN1+	METRNL
LEPR	2.92942e-15	1.24566	0.571	0.371	9.00358e-11	ITLN1+	LEPR
COL3A1	3.68541e-15	1.02156	0.618	0.385	1.13271e-10	ITLN1+	COL3A1
MMP2	3.69257e-15	1.35657	0.494	0.275	1.13491e-10	ITLN1+	MMP2
GABARAPL1	6.35241e-15	0.937084	0.761	0.592	1.95241e-10	ITLN1+	GABARAPL1
CDA	7.27068e-15	1.25386	0.514	0.302	2.23464e-10	ITLN1+	CDA
SNHG14	7.67883e-15	1.50201	0.591	0.383	2.36009e-10	ITLN1+	SNHG14
CREB3L2	1.52079e-14	1.29093	0.544	0.349	4.67415e-10	ITLN1+	CREB3L2
PKD2	2.13792e-14	1.57844	0.456	0.25	6.57089e-10	ITLN1+	PKD2
TMEM471	2.49893e-14	1.18691	0.575	0.375	7.68048e-10	ITLN1+	TMEM47
MIR99AHG	2.7963e-14	1.28444	0.471	0.251	8.59444e-10	ITLN1+	MIR99AHG
ALCAM	2.90839e-14	1.34157	0.432	0.228	8.93893e-10	ITLN1+	ALCAM
ALDH6A1	5.85893e-14	1.45569	0.425	0.237	1.80074e-09	ITLN1+	ALDH6A1
MECOM1	6.26684e-14	0.790798	0.745	0.596	1.92611e-09	ITLN1+	MECOM
EMP3	1.34871e-13	0.686935	0.541	0.311	4.14526e-09	ITLN1+	EMP3
MCL1	2.53148e-13	0.708295	0.873	0.804	7.7805e-09	ITLN1+	MCL1
LIMA1	2.57142e-13	0.740727	0.815	0.738	7.90325e-09	ITLN1+	LIMA1
RPS6KA5	4.53326e-13	1.79355	0.402	0.215	1.3933e-08	ITLN1+	RPS6KA5
TM7SF3	5.01839e-13	1.53788	0.51	0.341	1.5424e-08	ITLN1+	TM7SF3
MSI2	5.02543e-13	1.3939	0.49	0.303	1.54457e-08	ITLN1+	MSI2
LINC-PINT	5.79813e-13	1.23145	0.668	0.519	1.78205e-08	ITLN1+	LINC-PINT
RUNX1T1	7.08559e-13	0.921183	0.683	0.511	2.17776e-08	ITLN1+	RUNX1T1
POR	9.11808e-13	1.38687	0.456	0.278	2.80244e-08	ITLN1+	POR
LPCAT21	1.06e-12	1.01326	0.595	0.4	3.25791e-08	ITLN1+	LPCAT2
TMEM245	1.18645e-12	1.15119	0.633	0.478	3.64656e-08	ITLN1+	TMEM245
PGRMC2	1.26469e-12	1.16601	0.637	0.493	3.88702e-08	ITLN1+	PGRMC2
PLXDC2	1.34815e-12	0.758861	0.741	0.591	4.14354e-08	ITLN1+	PLXDC2
SYNPO	2.89721e-12	0.939034	0.668	0.515	8.90459e-08	ITLN1+	SYNPO
MYH10	3.24385e-12	1.21235	0.533	0.347	9.96997e-08	ITLN1+	MYH10
PIK3IP1	3.72205e-12	1.22229	0.429	0.243	1.14397e-07	ITLN1+	PIK3IP1
PKD1	3.88983e-12	1.55338	0.436	0.247	1.19554e-07	ITLN1+	PKD1
TXNDC5	4.17684e-12	0.899253	0.637	0.464	1.28375e-07	ITLN1+	TXNDC5
MYCBP2	4.50073e-12	0.892118	0.78	0.669	1.3833e-07	ITLN1+	MYCBP2
ACKR3	4.61558e-12	1.75127	0.421	0.24	1.4186e-07	ITLN1+	ACKR3
TSC22D1	5.11255e-12	0.691704	0.842	0.727	1.57134e-07	ITLN1+	TSC22D1
NPTN	6.48011e-12	1.07718	0.525	0.344	1.99166e-07	ITLN1+	NPTN
CD151	9.23113e-12	0.610865	0.815	0.796	2.83719e-07	ITLN1+	CD151
GMDS	1.02764e-11	1.40363	0.521	0.36	3.15846e-07	ITLN1+	GMDS
TSPYL2	1.04732e-11	1.49983	0.486	0.323	3.21893e-07	ITLN1+	TSPYL2
SMC4	1.79255e-11	1.38748	0.49	0.322	5.5094e-07	ITLN1+	SMC4
NR4A2	2.3267e-11	1.24779	0.541	0.371	7.15112e-07	ITLN1+	NR4A2
SGCB	2.39347e-11	1.37975	0.421	0.246	7.35634e-07	ITLN1+	SGCB
FKBP5	2.54046e-11	1.04941	0.788	0.646	7.8081e-07	ITLN1+	FKBP5
NSD3	3.62894e-11	1.03138	0.71	0.585	1.11535e-06	ITLN1+	NSD3
RFK	4.4518e-11	1.27181	0.537	0.385	1.36826e-06	ITLN1+	RFK
BNIP3L	4.51197e-11	0.91573	0.633	0.518	1.38675e-06	ITLN1+	BNIP3L
ADI1	5.85421e-11	1.11311	0.571	0.434	1.79929e-06	ITLN1+	ADI1
IER3	7.38257e-11	0.798486	0.861	0.798	2.26903e-06	ITLN1+	IER3
IGFBP5	7.77761e-11	0.677434	0.421	0.233	2.39045e-06	ITLN1+	IGFBP5
JCAD1	7.84137e-11	0.751946	0.703	0.57	2.41005e-06	ITLN1+	JCAD
LINC01578	8.65945e-11	0.677907	0.826	0.743	2.66148e-06	ITLN1+	LINC01578
TMBIM1	1.05589e-10	0.954404	0.629	0.494	3.24527e-06	ITLN1+	TMBIM1
ITPRID2	1.20024e-10	0.88329	0.753	0.633	3.68894e-06	ITLN1+	ITPRID2
ZBTB161	1.55329e-10	0.61712	0.807	0.72	4.77402e-06	ITLN1+	ZBTB16
RAB11FIP1	1.75113e-10	0.713399	0.49	0.284	5.3821e-06	ITLN1+	RAB11FIP1
PDCD4	2.035e-10	0.693079	0.737	0.598	6.25457e-06	ITLN1+	PDCD4
FARP1	2.17616e-10	1.16552	0.498	0.332	6.68842e-06	ITLN1+	FARP1
IGFBP6	2.98965e-10	1.19702	0.483	0.308	9.18868e-06	ITLN1+	IGFBP6
SYNJ2	3.26944e-10	1.15728	0.533	0.358	1.00486e-05	ITLN1+	SYNJ2
S100A4	3.33338e-10	0.925412	0.587	0.425	1.02451e-05	ITLN1+	S100A4
KIAA0355	3.43489e-10	0.759372	0.834	0.742	1.05571e-05	ITLN1+	KIAA0355
ITSN2	4.11918e-10	0.898657	0.645	0.506	1.26603e-05	ITLN1+	ITSN2
N4BP2L2	4.48332e-10	0.621427	0.853	0.793	1.37795e-05	ITLN1+	N4BP2L2
ADRB21	4.51116e-10	1.51347	0.452	0.29	1.38651e-05	ITLN1+	ADRB2
GNG5	4.74725e-10	0.540955	0.788	0.749	1.45907e-05	ITLN1+	GNG5
CXCL2	5.49713e-10	1.28718	0.645	0.51	1.68954e-05	ITLN1+	CXCL2
MYADM	6.15263e-10	0.995077	0.587	0.445	1.89101e-05	ITLN1+	MYADM
SNED1	6.74534e-10	1.35619	0.436	0.269	2.07318e-05	ITLN1+	SNED1
EGR3	9.06128e-10	1.8895	0.409	0.26	2.78498e-05	ITLN1+	EGR3
NUDT4	1.14861e-09	1.02322	0.556	0.405	3.53024e-05	ITLN1+	NUDT4
COMT	1.48255e-09	1.0442	0.529	0.404	4.55662e-05	ITLN1+	COMT
GALNT10	1.60114e-09	1.11947	0.525	0.365	4.9211e-05	ITLN1+	GALNT10
ISCU	1.7628e-09	0.735286	0.66	0.569	5.41795e-05	ITLN1+	ISCU
LPP	1.7696e-09	0.62556	0.788	0.683	5.43887e-05	ITLN1+	LPP
GABARAPL2	1.94695e-09	0.632348	0.714	0.674	5.98396e-05	ITLN1+	GABARAPL2
PINK1	2.08139e-09	0.941386	0.564	0.413	6.39716e-05	ITLN1+	PINK1
CELF2	2.81758e-09	1.36451	0.479	0.323	8.65983e-05	ITLN1+	CELF2
JUN	3.46796e-09	0.515801	0.961	0.932	0.000106588	ITLN1+	JUN
SESTD1	3.63686e-09	1.0413	0.514	0.351	0.000111779	ITLN1+	SESTD1
AIG1	3.66803e-09	1.11572	0.506	0.371	0.000112737	ITLN1+	AIG1
CTSF	4.29894e-09	1.12688	0.436	0.293	0.000132128	ITLN1+	CTSF
TPM11	4.32992e-09	0.726048	0.83	0.691	0.00013308	ITLN1+	TPM1
CCN2	4.38653e-09	0.637826	0.726	0.638	0.00013482	ITLN1+	CCN2
FOXO3	4.59443e-09	1.08731	0.622	0.515	0.00014121	ITLN1+	FOXO3
GPRC5B1	5.22673e-09	0.970803	0.529	0.388	0.000160644	ITLN1+	GPRC5B
TIMP2	5.32904e-09	0.70042	0.737	0.665	0.000163788	ITLN1+	TIMP2
CSRNP1	5.84743e-09	0.83132	0.645	0.529	0.000179721	ITLN1+	CSRNP1
MT-ND4L	5.90164e-09	0.500839	0.876	0.843	0.000181387	ITLN1+	MT-ND4L
NOTCH41	6.63307e-09	0.521752	0.641	0.455	0.000203867	ITLN1+	NOTCH4
TNRC6A	6.68518e-09	0.827672	0.614	0.475	0.000205469	ITLN1+	TNRC6A
DST1	7.14405e-09	0.547676	0.811	0.684	0.000219572	ITLN1+	DST
ZRANB2	8.36937e-09	0.902035	0.687	0.562	0.000257233	ITLN1+	ZRANB2
IGFBP2	8.59098e-09	0.827906	0.66	0.528	0.000264044	ITLN1+	IGFBP2
NORAD	1.15393e-08	0.661684	0.772	0.694	0.000354661	ITLN1+	NORAD
NET1	1.16533e-08	1.00002	0.568	0.427	0.000358166	ITLN1+	NET1
DYNLT3	1.32336e-08	1.15843	0.463	0.32	0.000406736	ITLN1+	DYNLT3
ABHD2	1.66944e-08	1.21996	0.521	0.382	0.000513101	ITLN1+	ABHD2
PDK4	1.78664e-08	0.794945	0.73	0.643	0.000549123	ITLN1+	PDK4
FRMD4B	1.79137e-08	0.903379	0.68	0.564	0.000550578	ITLN1+	FRMD4B
PEBP1	1.94858e-08	0.651925	0.707	0.686	0.000598895	ITLN1+	PEBP1
FSTL1	2.06716e-08	0.66773	0.664	0.541	0.000635342	ITLN1+	FSTL1
EVI5	2.29943e-08	1.17062	0.486	0.355	0.00070673	ITLN1+	EVI5
LXN	2.30661e-08	0.848438	0.502	0.363	0.000708935	ITLN1+	LXN
LAMB1	2.4853e-08	0.515773	0.714	0.555	0.000763856	ITLN1+	LAMB1
CYB5A	4.82132e-08	0.953458	0.548	0.445	0.00148183	ITLN1+	CYB5A
BEX4	4.87604e-08	0.997551	0.417	0.275	0.00149865	ITLN1+	BEX4
CPXM21	5.11989e-08	0.615473	0.653	0.524	0.0015736	ITLN1+	CPXM2
HSPA1B1	5.19546e-08	0.77124	0.764	0.671	0.00159682	ITLN1+	HSPA1B
DDIT4	5.73297e-08	0.615556	0.826	0.811	0.00176203	ITLN1+	DDIT4
FXYD61	6.17342e-08	0.567305	0.444	0.276	0.0018974	ITLN1+	FXYD6
SRSF7	6.6339e-08	0.993861	0.795	0.76	0.00203893	ITLN1+	SRSF7
UBB	6.80028e-08	0.512311	0.857	0.824	0.00209007	ITLN1+	UBB
CPQ	7.15546e-08	1.0152	0.448	0.311	0.00219923	ITLN1+	CPQ
DCN	7.4774e-08	0.55874	0.633	0.495	0.00229818	ITLN1+	DCN
PSAP	8.43288e-08	0.509982	0.822	0.802	0.00259185	ITLN1+	PSAP
FLNB	8.96118e-08	0.591462	0.83	0.775	0.00275422	ITLN1+	FLNB
COL1A1	9.00352e-08	0.97403	0.432	0.29	0.00276723	ITLN1+	COL1A1
NKTR	1.37662e-07	0.716187	0.903	0.803	0.00423105	ITLN1+	NKTR
SUN2	1.58991e-07	0.837712	0.614	0.508	0.00488659	ITLN1+	SUN2
TTC3	1.79648e-07	0.828	0.637	0.523	0.00552147	ITLN1+	TTC3
RCN2	2.16582e-07	0.866634	0.541	0.439	0.00665666	ITLN1+	RCN2
B4GALT1	2.33588e-07	0.94933	0.579	0.485	0.00717933	ITLN1+	B4GALT1
BEX3	2.33756e-07	0.988093	0.556	0.445	0.0071845	ITLN1+	BEX3
MBNL1	2.61253e-07	0.590246	0.896	0.859	0.00802961	ITLN1+	MBNL1
DPP7	3.31583e-07	0.644057	0.606	0.507	0.0101912	ITLN1+	DPP7
PGRMC1	4.07237e-07	0.664217	0.637	0.549	0.0125164	ITLN1+	PGRMC1
GATA2	4.08327e-07	0.558848	0.653	0.532	0.0125499	ITLN1+	GATA2
LAPTM4A	4.81817e-07	0.516472	0.737	0.708	0.0148087	ITLN1+	LAPTM4A
THUMPD1	5.0941e-07	0.913601	0.548	0.445	0.0156567	ITLN1+	THUMPD1
TRIM38	5.5316e-07	1.03738	0.51	0.382	0.0170014	ITLN1+	TRIM38
H2AFJ	6.23924e-07	0.615462	0.598	0.489	0.0191763	ITLN1+	H2AFJ
2024-03-06	6.48632e-07	0.801046	0.625	0.516	0.0199357	ITLN1+	2024-03-06
CDKN1C1	7.95232e-07	0.566514	0.571	0.451	0.0244414	ITLN1+	CDKN1C
BLCAP	8.79187e-07	0.836401	0.51	0.384	0.0270218	ITLN1+	BLCAP
COX17	9.71237e-07	0.632999	0.587	0.472	0.029851	ITLN1+	COX17
DUSP5	1.17042e-06	0.805493	0.556	0.459	0.0359729	ITLN1+	DUSP5
TM9SF2	1.19053e-06	0.779635	0.587	0.481	0.0365909	ITLN1+	TM9SF2
SNRPN	1.33342e-06	0.845544	0.506	0.4	0.0409826	ITLN1+	SNRPN
CARD16	1.68552e-06	0.952302	0.49	0.382	0.0518043	ITLN1+	CARD16
IFITM1	1.69166e-06	0.714365	0.525	0.393	0.0519932	ITLN1+	IFITM1
RICTOR	1.89035e-06	1.0039	0.533	0.418	0.0580998	ITLN1+	RICTOR
ANKRD37	1.94152e-06	1.01607	0.483	0.35	0.0596727	ITLN1+	ANKRD37
FTX	2.90374e-06	0.824456	0.645	0.545	0.0892463	ITLN1+	FTX
TMEM30A	3.40947e-06	0.533439	0.71	0.618	0.10479	ITLN1+	TMEM30A
CTBS	3.45071e-06	0.762442	0.49	0.376	0.106057	ITLN1+	CTBS
AFF4	3.47256e-06	0.765446	0.73	0.667	0.106729	ITLN1+	AFF4
HCFC1R1	3.5849e-06	0.936356	0.479	0.377	0.110182	ITLN1+	HCFC1R1
SMAD7	3.78467e-06	0.537381	0.714	0.604	0.116322	ITLN1+	SMAD7
ZSCAN18	5.23077e-06	1.01267	0.444	0.331	0.160768	ITLN1+	ZSCAN18
STX16	5.53997e-06	0.870302	0.579	0.473	0.170271	ITLN1+	STX16
PARVA	5.55747e-06	0.732232	0.56	0.457	0.170809	ITLN1+	PARVA
LUC7L3	6.65753e-06	0.564566	0.772	0.675	0.204619	ITLN1+	LUC7L3
AOPEP	6.9432e-06	0.702524	0.49	0.369	0.213399	ITLN1+	AOPEP
MAFF	7.03586e-06	0.652906	0.722	0.669	0.216247	ITLN1+	MAFF
LIMS1	8.37823e-06	0.522887	0.772	0.748	0.257505	ITLN1+	LIMS1
IRF2BP2	8.48182e-06	0.610959	0.71	0.662	0.260689	ITLN1+	IRF2BP2
ASAP2	8.88422e-06	0.979773	0.548	0.456	0.273057	ITLN1+	ASAP2
CCDC66	9.27283e-06	0.857432	0.402	0.283	0.285001	ITLN1+	CCDC66
PDLIM4	1.00154e-05	0.571909	0.463	0.332	0.307823	ITLN1+	PDLIM4
MAGI2-AS3	1.02021e-05	0.679079	0.571	0.472	0.313561	ITLN1+	MAGI2-AS3
ITGAV	1.03912e-05	0.717381	0.598	0.486	0.319375	ITLN1+	ITGAV
MMP28	1.12402e-05	0.517334	0.583	0.463	0.345469	ITLN1+	MMP28
PTPN14	1.28732e-05	0.618164	0.637	0.538	0.395657	ITLN1+	PTPN14
FNBP1	1.33222e-05	0.901578	0.517	0.427	0.409457	ITLN1+	FNBP1
MKLN1	1.40614e-05	0.856819	0.595	0.496	0.432177	ITLN1+	MKLN1
MLLT1	1.43897e-05	0.94255	0.44	0.331	0.442269	ITLN1+	MLLT1
LRIG1	1.72641e-05	0.908533	0.44	0.323	0.530611	ITLN1+	LRIG1
PKIG1	1.77438e-05	0.671968	0.571	0.487	0.545355	ITLN1+	PKIG
FAM114A1	2.19609e-05	0.773067	0.467	0.362	0.674967	ITLN1+	FAM114A1
TSPAN3	2.23679e-05	0.689281	0.502	0.395	0.687476	ITLN1+	TSPAN3
WWP1	2.40409e-05	0.639518	0.633	0.554	0.738897	ITLN1+	WWP1
USP53	2.42298e-05	0.947175	0.541	0.464	0.744703	ITLN1+	USP53
TMEM106B	2.46147e-05	0.682359	0.486	0.379	0.756531	ITLN1+	TMEM106B
DAP	2.54418e-05	0.661253	0.537	0.449	0.781955	ITLN1+	DAP
CREG1	2.76027e-05	0.667846	0.456	0.35	0.84837	ITLN1+	CREG1
PAM	2.80056e-05	0.708941	0.529	0.44	0.860752	ITLN1+	PAM
TRIM56	2.81883e-05	0.604284	0.649	0.565	0.866367	ITLN1+	TRIM56
TNFSF12	2.9593e-05	0.927327	0.421	0.328	0.909541	ITLN1+	TNFSF12
NPEPPS	3.87717e-05	0.656967	0.595	0.514	1	ITLN1+	NPEPPS
INSR	3.96574e-05	0.787818	0.425	0.317	1	ITLN1+	INSR
CASC4	4.47501e-05	0.809196	0.514	0.418	1	ITLN1+	CASC4
PGM2L1	4.85655e-05	1.04233	0.498	0.409	1	ITLN1+	PGM2L1
KIF13B	5.1581e-05	0.594325	0.429	0.314	1	ITLN1+	KIF13B
ANO6	5.3323e-05	0.867886	0.552	0.47	1	ITLN1+	ANO6
PER1	5.45922e-05	0.648161	0.614	0.552	1	ITLN1+	PER1
ABI2	5.81216e-05	0.801517	0.456	0.351	1	ITLN1+	ABI2
CWF19L2	5.85384e-05	0.741653	0.49	0.389	1	ITLN1+	CWF19L2
MORF4L2	8.03685e-05	0.506335	0.595	0.518	1	ITLN1+	MORF4L2
HIPK2	9.1243e-05	0.900337	0.44	0.352	1	ITLN1+	HIPK2
ARL1	9.24095e-05	0.731777	0.483	0.396	1	ITLN1+	ARL1
AASS	0.000105739	0.920005	0.467	0.373	1	ITLN1+	AASS
TOB1	0.000115324	0.714413	0.417	0.321	1	ITLN1+	TOB1
PSIP1	0.000133357	0.547942	0.653	0.628	1	ITLN1+	PSIP1
SLC25A37	0.00015272	0.635895	0.664	0.573	1	ITLN1+	SLC25A37
LAMP2	0.000156545	0.643243	0.61	0.545	1	ITLN1+	LAMP2
ATP6AP2	0.000160681	0.625334	0.629	0.588	1	ITLN1+	ATP6AP2
TFDP2	0.00017192	0.841614	0.425	0.328	1	ITLN1+	TFDP2
ID2	0.000195048	0.549711	0.691	0.611	1	ITLN1+	ID2
LDLRAD4	0.000200474	0.664491	0.436	0.339	1	ITLN1+	LDLRAD4
CNTNAP3B	0.000238949	1.03052	0.521	0.43	1	ITLN1+	CNTNAP3B
AC020916.1	0.000290882	0.945468	0.68	0.597	1	ITLN1+	AC020916.1
TNS1	0.000317367	0.62202	0.645	0.575	1	ITLN1+	TNS1
MARK3	0.000325956	0.935015	0.541	0.459	1	ITLN1+	MARK3
LMCD1	0.000329478	0.505062	0.656	0.609	1	ITLN1+	LMCD1
ARFGEF2	0.000366278	0.947232	0.448	0.367	1	ITLN1+	ARFGEF2
ZFC3H1	0.000366624	0.852364	0.479	0.402	1	ITLN1+	ZFC3H1
RIMKLB	0.000367053	0.69112	0.475	0.382	1	ITLN1+	RIMKLB
NCOA3	0.000391726	0.658429	0.587	0.513	1	ITLN1+	NCOA3
ZNF521	0.000412169	0.591384	0.544	0.443	1	ITLN1+	ZNF521
CREBRF	0.000424881	0.628715	0.614	0.559	1	ITLN1+	CREBRF
OIP5-AS1	0.000443241	0.808137	0.471	0.386	1	ITLN1+	OIP5-AS1
CCPG1	0.00050159	0.511759	0.633	0.601	1	ITLN1+	CCPG1
CTBP2	0.000505264	0.763628	0.568	0.51	1	ITLN1+	CTBP2
CHSY1	0.000584413	0.528976	0.618	0.549	1	ITLN1+	CHSY1
TSC22D2	0.000599625	0.998793	0.494	0.434	1	ITLN1+	TSC22D2
GOLIM4	0.000639589	0.700665	0.514	0.447	1	ITLN1+	GOLIM4
HBP1	0.00066715	0.656726	0.552	0.487	1	ITLN1+	HBP1
DLL41	0.000698207	0.57196	0.402	0.307	1	ITLN1+	DLL4
TRIM22	0.000740706	0.756039	0.409	0.323	1	ITLN1+	TRIM22
TIA1	0.000741105	0.715471	0.436	0.353	1	ITLN1+	TIA1
TM2D1	0.000899407	0.620369	0.463	0.391	1	ITLN1+	TM2D1
FAM120AOS	0.000970898	0.784735	0.44	0.375	1	ITLN1+	FAM120AOS
INTS6	0.00101708	0.708532	0.571	0.505	1	ITLN1+	INTS6
EIF1B	0.00102247	0.587302	0.61	0.576	1	ITLN1+	EIF1B
SKI	0.00108068	0.579317	0.548	0.484	1	ITLN1+	SKI
PITPNA	0.00115105	0.730778	0.417	0.343	1	ITLN1+	PITPNA
CRTAP	0.00117143	0.532626	0.591	0.542	1	ITLN1+	CRTAP
SLC41A3	0.00125452	0.719985	0.463	0.4	1	ITLN1+	SLC41A3
CCNH	0.00127928	0.961552	0.413	0.345	1	ITLN1+	CCNH
ZCCHC24	0.00131587	0.737075	0.417	0.344	1	ITLN1+	ZCCHC24
AZIN1	0.00136465	0.526625	0.421	0.334	1	ITLN1+	AZIN1
JPX	0.00159297	0.677127	0.541	0.476	1	ITLN1+	JPX
SAP30	0.00160299	0.841641	0.429	0.365	1	ITLN1+	SAP30
AHCTF1	0.0017244	0.632652	0.533	0.458	1	ITLN1+	AHCTF1
UBE2W	0.00186248	0.745629	0.402	0.327	1	ITLN1+	UBE2W
KCNQ1OT1	0.00195459	0.635454	0.405	0.329	1	ITLN1+	KCNQ1OT1
CCDC107	0.00284758	0.78261	0.405	0.338	1	ITLN1+	CCDC107
SNHG32	0.00303097	0.529331	0.568	0.535	1	ITLN1+	SNHG32
TEAD1	0.00324242	0.545033	0.544	0.462	1	ITLN1+	TEAD1
MET	0.00335463	0.50184	0.571	0.486	1	ITLN1+	MET
PPP1R3B	0.00360938	0.681762	0.432	0.358	1	ITLN1+	PPP1R3B
ZCRB1	0.00373879	0.583927	0.548	0.504	1	ITLN1+	ZCRB1
LUC7L	0.00374982	0.675418	0.471	0.406	1	ITLN1+	LUC7L
DGKE1	0.00379711	0.737914	0.49	0.418	1	ITLN1+	DGKE
ITPR1	0.0039238	0.657185	0.595	0.522	1	ITLN1+	ITPR1
PIK3C2B	0.00402164	0.717921	0.413	0.341	1	ITLN1+	PIK3C2B
MXI1	0.00430492	0.670371	0.459	0.403	1	ITLN1+	MXI1
LMBRD1	0.00432656	0.603736	0.471	0.408	1	ITLN1+	LMBRD1
MAP3K20	0.00444041	0.716514	0.409	0.345	1	ITLN1+	MAP3K20
PCYOX1	0.00452167	0.577063	0.479	0.413	1	ITLN1+	PCYOX1
FAM162A	0.00466824	0.776445	0.409	0.359	1	ITLN1+	FAM162A
MPC2	0.00515054	0.621126	0.467	0.423	1	ITLN1+	MPC2
CAMK2D	0.00622279	0.535089	0.525	0.477	1	ITLN1+	CAMK2D
CENPC	0.0065655	0.734454	0.494	0.434	1	ITLN1+	CENPC
LMO4	0.00668963	0.724928	0.429	0.369	1	ITLN1+	LMO4
SELENOF	0.00740705	0.53355	0.556	0.542	1	ITLN1+	SELENOF
ADAMTS1	0.00781833	0.607297	0.78	0.778	1	ITLN1+	ADAMTS1
EFEMP11	1.17039e-62	3.09302	0.876	0.303	3.59718e-58	EFEMP1+	EFEMP1
CRTAC1	4.52507e-56	3.02711	0.686	0.167	1.39078e-51	EFEMP1+	CRTAC1
IL1RL1	6.36027e-54	5.53836	0.409	0.048	1.95483e-49	EFEMP1+	IL1RL1
CPE1	8.29235e-53	2.46506	0.774	0.222	2.54865e-48	EFEMP1+	CPE
SCARA3	2.86296e-46	3.18541	0.642	0.179	8.79931e-42	EFEMP1+	SCARA3
ABCA8	1.37474e-45	3.09165	0.453	0.072	4.22527e-41	EFEMP1+	ABCA8
TIMP1	1.51021e-41	2.73513	0.949	0.864	4.64164e-37	EFEMP1+	TIMP1
GALNT1	3.21903e-41	2.23703	0.854	0.444	9.89368e-37	EFEMP1+	GALNT1
MGP1	6.8145e-39	2.28853	0.985	0.922	2.09444e-34	EFEMP1+	MGP
POSTN1	9.57184e-36	2.36616	0.861	0.525	2.9419e-31	EFEMP1+	POSTN
PTGS1	7.29833e-35	2.7468	0.445	0.088	2.24314e-30	EFEMP1+	PTGS1
FOXC2	1.92518e-34	1.91603	0.518	0.127	5.91704e-30	EFEMP1+	FOXC2
PTGS21	2.48312e-33	1.94356	0.708	0.256	7.63187e-29	EFEMP1+	PTGS2
CLU1	4.61774e-33	2.91477	0.927	0.799	1.41926e-28	EFEMP1+	CLU
SERPINE11	4.19418e-31	1.74037	0.891	0.564	1.28908e-26	EFEMP1+	SERPINE1
GPM6A	5.98018e-31	2.29853	0.482	0.12	1.83801e-26	EFEMP1+	GPM6A
CTHRC1	2.15476e-30	2.28062	0.613	0.22	6.62265e-26	EFEMP1+	CTHRC1
COL3A11	2.60048e-27	1.98668	0.766	0.391	7.99256e-23	EFEMP1+	COL3A1
MMRN1	2.88676e-27	1.3959	0.869	0.593	8.87246e-23	EFEMP1+	MMRN1
AKR1C2	5.23236e-27	1.87149	0.533	0.169	1.60817e-22	EFEMP1+	AKR1C2
C1QTNF1	2.22131e-26	2.11157	0.628	0.262	6.8272e-22	EFEMP1+	C1QTNF1
DKK31	2.24816e-26	1.38488	0.591	0.186	6.90973e-22	EFEMP1+	DKK3
BGN1	9.85598e-26	1.50851	0.774	0.393	3.02924e-21	EFEMP1+	BGN
PDLIM41	1.02043e-25	1.90242	0.693	0.321	3.1363e-21	EFEMP1+	PDLIM4
PLEKHA5	3.31783e-24	2.26657	0.504	0.165	1.01973e-19	EFEMP1+	PLEKHA5
TXNDC51	4.21985e-24	1.83326	0.781	0.465	1.29697e-19	EFEMP1+	TXNDC5
IL1R11	4.39836e-24	1.7716	0.847	0.581	1.35183e-19	EFEMP1+	IL1R1
DCN1	8.41808e-24	2.59953	0.774	0.493	2.5873e-19	EFEMP1+	DCN
BMP41	8.45205e-24	2.11744	0.606	0.244	2.59774e-19	EFEMP1+	BMP4
DDAH1	2.59874e-23	2.39437	0.401	0.108	7.98722e-19	EFEMP1+	DDAH1
ENO1	1.15813e-22	1.29879	0.905	0.692	3.55952e-18	EFEMP1+	ENO1
LITAF	3.13352e-22	1.76194	0.628	0.269	9.63087e-18	EFEMP1+	LITAF
HSP90B1	3.56692e-22	1.24677	0.927	0.8	1.09629e-17	EFEMP1+	HSP90B1
CDH111	2.17248e-21	1.53605	0.569	0.218	6.67711e-17	EFEMP1+	CDH11
H2AFJ1	4.40484e-21	1.41245	0.788	0.48	1.35383e-16	EFEMP1+	H2AFJ
THBS11	5.34504e-21	2.18577	0.708	0.355	1.6428e-16	EFEMP1+	THBS1
LAMA4	5.48926e-21	1.32392	0.796	0.474	1.68712e-16	EFEMP1+	LAMA4
NDRG4	9.14444e-21	1.98451	0.474	0.16	2.81054e-16	EFEMP1+	NDRG4
CD63	1.47125e-20	0.744311	0.964	0.897	4.52189e-16	EFEMP1+	CD63
AKR1C1	1.99235e-20	1.64042	0.657	0.32	6.12348e-16	EFEMP1+	AKR1C1
PTPRF	2.00707e-20	1.66512	0.409	0.115	6.16874e-16	EFEMP1+	PTPRF
KRT18	7.65737e-20	2.10137	0.569	0.262	2.35349e-15	EFEMP1+	KRT18
RAB11FIP11	1.78957e-19	1.69179	0.62	0.289	5.50024e-15	EFEMP1+	RAB11FIP1
ST8SIA61	3.5976e-19	1.55756	0.569	0.233	1.10572e-14	EFEMP1+	ST8SIA6
GAPDH	5.57257e-19	0.765854	0.993	0.935	1.71273e-14	EFEMP1+	GAPDH
BMP61	5.91142e-19	1.22818	0.708	0.36	1.81688e-14	EFEMP1+	BMP6
BMP2	8.92646e-19	2.19341	0.511	0.206	2.74355e-14	EFEMP1+	BMP2
CH25H	1.05159e-18	2.57069	0.416	0.148	3.23206e-14	EFEMP1+	CH25H
MIF	1.2463e-18	1.09301	0.92	0.794	3.8305e-14	EFEMP1+	MIF
COL18A11	1.47214e-18	1.25351	0.832	0.644	4.52463e-14	EFEMP1+	COL18A1
ADGRG6	2.79588e-18	1.16509	0.533	0.191	8.59314e-14	EFEMP1+	ADGRG6
ITGB3	2.8234e-18	1.64078	0.489	0.188	8.67772e-14	EFEMP1+	ITGB3
TSPO	4.96644e-18	0.841857	0.883	0.74	1.52644e-13	EFEMP1+	TSPO
S100A6	5.18125e-18	0.767449	1	0.98	1.59246e-13	EFEMP1+	S100A6
VAMP8	6.19435e-18	1.82412	0.482	0.185	1.90383e-13	EFEMP1+	VAMP8
TMOD11	6.73509e-18	1.47483	0.533	0.214	2.07003e-13	EFEMP1+	TMOD1
PKM	7.03398e-18	1.26599	0.803	0.617	2.1619e-13	EFEMP1+	PKM
IER31	7.2513e-18	1.06295	0.934	0.796	2.22869e-13	EFEMP1+	IER3
UGP2	2.26872e-17	1.44021	0.752	0.519	6.97291e-13	EFEMP1+	UGP2
SH3BGRL3	2.36538e-17	0.926433	0.905	0.802	7.27e-13	EFEMP1+	SH3BGRL3
GOLM1	2.60842e-17	1.94327	0.496	0.212	8.01697e-13	EFEMP1+	GOLM1
P4HB	5.11662e-17	1.11214	0.818	0.654	1.57259e-12	EFEMP1+	P4HB
NT5E	6.24116e-17	1.52976	0.606	0.297	1.91822e-12	EFEMP1+	NT5E
CFH1	2.25017e-16	1.61724	0.737	0.486	6.91589e-12	EFEMP1+	CFH
GJA4	3.74669e-16	1.51002	0.533	0.237	1.15154e-11	EFEMP1+	GJA4
SSR4	3.88828e-16	0.918532	0.876	0.711	1.19506e-11	EFEMP1+	SSR4
DIXDC11	4.08536e-16	1.28511	0.701	0.401	1.25563e-11	EFEMP1+	DIXDC1
WWTR11	4.79666e-16	0.904685	0.905	0.811	1.47425e-11	EFEMP1+	WWTR1
TPI1	1.26504e-15	1.122	0.839	0.666	3.88811e-11	EFEMP1+	TPI1
PDIA3	1.5566e-15	1.10129	0.854	0.748	4.7842e-11	EFEMP1+	PDIA3
RPSA	3.2394e-15	0.638758	0.964	0.9	9.95629e-11	EFEMP1+	RPSA
FGF21	4.15165e-15	1.21475	0.635	0.335	1.27601e-10	EFEMP1+	FGF2
EDN11	5.83599e-15	1.48156	0.759	0.495	1.79369e-10	EFEMP1+	EDN1
BMX1	5.87449e-15	1.00967	0.766	0.501	1.80553e-10	EFEMP1+	BMX
EPB41L31	5.90431e-15	0.960361	0.745	0.438	1.81469e-10	EFEMP1+	EPB41L3
GPX4	9.39118e-15	0.884377	0.876	0.718	2.88638e-10	EFEMP1+	GPX4
HAPLN31	1.21376e-14	1.27242	0.701	0.416	3.73048e-10	EFEMP1+	HAPLN3
TMSB4X	1.35894e-14	0.508673	1	0.994	4.1767e-10	EFEMP1+	TMSB4X
LAMB11	1.50425e-14	0.891598	0.832	0.558	4.62332e-10	EFEMP1+	LAMB1
NNMT1	1.53008e-14	0.898003	0.869	0.754	4.7027e-10	EFEMP1+	NNMT
EGLN3	1.89151e-14	1.50682	0.577	0.297	5.81355e-10	EFEMP1+	EGLN3
ANGPTL4	2.1017e-14	2.20851	0.547	0.29	6.45958e-10	EFEMP1+	ANGPTL4
HMGA1	6.19198e-14	1.79561	0.584	0.329	1.90311e-09	EFEMP1+	HMGA1
RND3	7.52463e-14	1.16841	0.533	0.252	2.3127e-09	EFEMP1+	RND3
CAMK2D1	8.24162e-14	0.932951	0.752	0.46	2.53306e-09	EFEMP1+	CAMK2D
ITGB4	8.34838e-14	1.55784	0.781	0.615	2.56587e-09	EFEMP1+	ITGB4
PRCP1	1.79931e-13	0.825069	0.825	0.608	5.53018e-09	EFEMP1+	PRCP
SERF2	1.82638e-13	0.503863	0.927	0.914	5.61336e-09	EFEMP1+	SERF2
CD14	2.55884e-13	1.347	0.438	0.188	7.8646e-09	EFEMP1+	CD14
MBOAT7	2.6803e-13	1.57982	0.482	0.228	8.2379e-09	EFEMP1+	MBOAT7
MARVELD1	2.77182e-13	1.31105	0.423	0.167	8.5192e-09	EFEMP1+	MARVELD1
BACE2	4.437e-13	0.908777	0.832	0.623	1.36371e-08	EFEMP1+	BACE2
NR2F21	5.35801e-13	0.614317	0.891	0.622	1.64678e-08	EFEMP1+	NR2F2
PPIB	5.73984e-13	0.810374	0.854	0.749	1.76414e-08	EFEMP1+	PPIB
CYP1B11	5.9584e-13	0.969441	0.672	0.361	1.83131e-08	EFEMP1+	CYP1B1
TOMM6	6.39722e-13	1.12243	0.759	0.523	1.96619e-08	EFEMP1+	TOMM6
ACTN11	7.15848e-13	0.819723	0.891	0.776	2.20016e-08	EFEMP1+	ACTN1
MMP281	7.26569e-13	1.29543	0.693	0.463	2.23311e-08	EFEMP1+	MMP28
ACKR31	8.34358e-13	1.06892	0.526	0.246	2.5644e-08	EFEMP1+	ACKR3
CDH131	9.67831e-13	0.963856	0.73	0.479	2.97463e-08	EFEMP1+	CDH13
ARHGDIB	1.22546e-12	1.11559	0.715	0.529	3.76646e-08	EFEMP1+	ARHGDIB
PTGIS1	1.26842e-12	0.753287	0.701	0.379	3.8985e-08	EFEMP1+	PTGIS
AKAP12	1.43341e-12	0.998048	0.781	0.489	4.40558e-08	EFEMP1+	AKAP12
SERPINB11	1.56197e-12	1.01637	0.81	0.612	4.80071e-08	EFEMP1+	SERPINB1
NRGN	1.71969e-12	1.74666	0.401	0.169	5.28548e-08	EFEMP1+	NRGN
PROCR1	1.78889e-12	1.03391	0.642	0.372	5.49815e-08	EFEMP1+	PROCR
CCN11	2.30161e-12	1.30175	0.774	0.612	7.07399e-08	EFEMP1+	CCN1
PLOD2	2.35885e-12	1.47548	0.657	0.397	7.24994e-08	EFEMP1+	PLOD2
PPIA	2.47446e-12	0.637324	0.964	0.857	7.60526e-08	EFEMP1+	PPIA
CALR	2.53852e-12	0.959749	0.869	0.711	7.80214e-08	EFEMP1+	CALR
2024-03-03	2.68392e-12	1.70342	0.409	0.175	8.24903e-08	EFEMP1+	2024-03-03
F2R1	2.98328e-12	1.19267	0.599	0.329	9.16911e-08	EFEMP1+	F2R
APRT	3.16111e-12	0.954573	0.759	0.578	9.71568e-08	EFEMP1+	APRT
PRSS231	4.07092e-12	0.873996	0.832	0.608	1.2512e-07	EFEMP1+	PRSS23
MYOF	4.43847e-12	0.805246	0.869	0.695	1.36416e-07	EFEMP1+	MYOF
FKBP1A	4.76344e-12	0.59111	0.942	0.864	1.46404e-07	EFEMP1+	FKBP1A
ITGA21	4.93348e-12	1.22582	0.555	0.298	1.51631e-07	EFEMP1+	ITGA2
CCN21	6.61777e-12	2.1989	0.752	0.643	2.03397e-07	EFEMP1+	CCN2
TLN1	8.50631e-12	0.755026	0.861	0.69	2.61441e-07	EFEMP1+	TLN1
RAI141	8.69388e-12	0.937359	0.73	0.491	2.67206e-07	EFEMP1+	RAI14
ANKRD50	9.43783e-12	1.20232	0.562	0.297	2.90072e-07	EFEMP1+	ANKRD50
RPLP01	1.05259e-11	0.527402	0.978	0.936	3.23514e-07	EFEMP1+	RPLP0
PRXL2A	1.07827e-11	0.928035	0.781	0.573	3.31406e-07	EFEMP1+	PRXL2A
CANX	1.092e-11	0.68599	0.891	0.778	3.35627e-07	EFEMP1+	CANX
IMPAD1	1.15121e-11	1.40786	0.591	0.347	3.53824e-07	EFEMP1+	IMPAD1
DNMBP	1.22064e-11	1.61301	0.438	0.211	3.75163e-07	EFEMP1+	DNMBP
PLCXD31	1.3741e-11	0.902666	0.518	0.248	4.22329e-07	EFEMP1+	PLCXD3
PDIA6	1.77736e-11	0.862837	0.796	0.663	5.46272e-07	EFEMP1+	PDIA6
PERP1	2.55112e-11	1.06829	0.693	0.456	7.84087e-07	EFEMP1+	PERP
SOX7	4.07748e-11	0.899297	0.752	0.515	1.25321e-06	EFEMP1+	SOX7
HRCT1	4.16717e-11	1.88759	0.518	0.289	1.28078e-06	EFEMP1+	HRCT1
LXN1	4.63837e-11	1.23132	0.62	0.364	1.4256e-06	EFEMP1+	LXN
ADSS	4.94346e-11	1.14552	0.693	0.475	1.51937e-06	EFEMP1+	ADSS
ACTG1	5.72574e-11	0.562278	0.978	0.959	1.75981e-06	EFEMP1+	ACTG1
KRT8	5.92496e-11	1.44171	0.431	0.205	1.82104e-06	EFEMP1+	KRT8
METRNL1	6.21531e-11	0.995529	0.766	0.574	1.91028e-06	EFEMP1+	METRNL
FOXC11	1.01467e-10	0.740861	0.876	0.729	3.11858e-06	EFEMP1+	FOXC1
LINC01197	1.08537e-10	1.02007	0.46	0.215	3.33588e-06	EFEMP1+	LINC01197
FSTL11	1.29683e-10	0.862536	0.759	0.543	3.98582e-06	EFEMP1+	FSTL1
HMGN3	1.33658e-10	0.980244	0.774	0.652	4.10797e-06	EFEMP1+	HMGN3
TMED3	1.37611e-10	1.49755	0.401	0.181	4.22946e-06	EFEMP1+	TMED3
VEGFA	2.23247e-10	1.43743	0.467	0.237	6.8615e-06	EFEMP1+	VEGFA
CAPNS1	2.58458e-10	0.709351	0.861	0.717	7.94369e-06	EFEMP1+	CAPNS1
AHNAK2	2.97984e-10	1.08127	0.664	0.427	9.15855e-06	EFEMP1+	AHNAK2
SGMS2	3.58066e-10	1.32394	0.423	0.199	1.10052e-05	EFEMP1+	SGMS2
SEC61A1	3.92237e-10	0.873406	0.65	0.425	1.20554e-05	EFEMP1+	SEC61A1
OAZ11	4.32894e-10	0.538494	0.861	0.789	1.3305e-05	EFEMP1+	OAZ1
CTNNAL11	4.50475e-10	0.887325	0.737	0.552	1.38454e-05	EFEMP1+	CTNNAL1
FAM234A	4.65914e-10	0.886745	0.54	0.301	1.43199e-05	EFEMP1+	FAM234A
EIF4EBP1	4.71696e-10	1.47952	0.46	0.24	1.44976e-05	EFEMP1+	EIF4EBP1
DPYSL3	4.81696e-10	1.0712	0.65	0.432	1.48049e-05	EFEMP1+	DPYSL3
HILPDA	6.16617e-10	1.71102	0.504	0.284	1.89517e-05	EFEMP1+	HILPDA
ST6GAL1	7.5185e-10	1.09279	0.664	0.45	2.31081e-05	EFEMP1+	ST6GAL1
MMP21	7.90938e-10	1.04744	0.526	0.29	2.43095e-05	EFEMP1+	MMP2
PLA2R11	8.00748e-10	1.30582	0.401	0.188	2.4611e-05	EFEMP1+	PLA2R1
NDUFS5	8.58625e-10	0.772486	0.788	0.662	2.63898e-05	EFEMP1+	NDUFS5
LRIG11	1.20913e-09	1.11036	0.555	0.322	3.71626e-05	EFEMP1+	LRIG1
TMED9	1.25772e-09	0.821224	0.774	0.58	3.86559e-05	EFEMP1+	TMED9
CCL141	1.37139e-09	0.895027	0.847	0.722	4.21497e-05	EFEMP1+	CCL14
MT-ND5	1.37659e-09	0.514487	0.971	0.971	4.23094e-05	EFEMP1+	MT-ND5
VCAN1	1.48784e-09	1.17075	0.613	0.369	4.57288e-05	EFEMP1+	VCAN
GSTP1	1.50556e-09	0.766465	0.839	0.75	4.62733e-05	EFEMP1+	GSTP1
PFKP	1.84966e-09	1.09754	0.628	0.433	5.68494e-05	EFEMP1+	PFKP
TNFRSF12A	2.06301e-09	1.47379	0.445	0.233	6.34065e-05	EFEMP1+	TNFRSF12A
CTSB	2.12303e-09	0.540512	0.803	0.593	6.52513e-05	EFEMP1+	CTSB
GMDS1	2.13847e-09	1.01301	0.591	0.367	6.57257e-05	EFEMP1+	GMDS
TKT	2.21942e-09	0.921118	0.701	0.512	6.82137e-05	EFEMP1+	TKT
C1orf122	2.30159e-09	1.39542	0.584	0.39	7.07393e-05	EFEMP1+	C1orf122
CD59	2.3866e-09	0.50996	0.942	0.943	7.33523e-05	EFEMP1+	CD59
ECSCR	2.69839e-09	0.591711	0.839	0.775	8.2935e-05	EFEMP1+	ECSCR
EMCN1	3.33903e-09	0.691433	0.861	0.678	0.000102625	EFEMP1+	EMCN
NDUFA13	3.59802e-09	0.649973	0.832	0.692	0.000110585	EFEMP1+	NDUFA13
RCAN1	4.44985e-09	0.966527	0.591	0.385	0.000136766	EFEMP1+	RCAN1
PDGFA	4.60132e-09	1.64779	0.453	0.24	0.000141421	EFEMP1+	PDGFA
PRDX2	4.98433e-09	0.77435	0.737	0.582	0.000153193	EFEMP1+	PRDX2
CCDC801	4.99652e-09	0.564402	0.628	0.361	0.000153568	EFEMP1+	CCDC80
ABCG2	5.17394e-09	0.926288	0.474	0.247	0.000159021	EFEMP1+	ABCG2
FAM43A	6.27584e-09	0.997672	0.708	0.479	0.000192888	EFEMP1+	FAM43A
AK4	6.50703e-09	1.44534	0.496	0.281	0.000199993	EFEMP1+	AK4
SIVA1	8.77524e-09	0.934205	0.715	0.549	0.000269707	EFEMP1+	SIVA1
LDHA	9.0315e-09	0.501257	0.92	0.83	0.000277583	EFEMP1+	LDHA
ALDH1A2	9.3722e-09	1.05028	0.489	0.259	0.000288054	EFEMP1+	ALDH1A2
CARMIL1	9.5897e-09	0.800176	0.423	0.201	0.00029474	EFEMP1+	CARMIL1
PLA2G2A	1.12722e-08	1.49856	0.409	0.207	0.000346451	EFEMP1+	PLA2G2A
TMEM9	1.15538e-08	1.33114	0.46	0.252	0.000355107	EFEMP1+	TMEM9
UCK2	1.34023e-08	1.17035	0.438	0.234	0.00041192	EFEMP1+	UCK2
MRPL41	1.81555e-08	0.872588	0.664	0.502	0.000558009	EFEMP1+	MRPL41
COPE	2.19009e-08	0.746772	0.701	0.525	0.000673124	EFEMP1+	COPE
CRELD2	2.33823e-08	1.11059	0.482	0.279	0.000718655	EFEMP1+	CRELD2
ZC3H8	2.35724e-08	1.07139	0.431	0.226	0.000724498	EFEMP1+	ZC3H8
ENG1	2.41179e-08	0.535376	0.912	0.832	0.000741265	EFEMP1+	ENG
GOT2	2.53205e-08	1.08717	0.445	0.239	0.000778224	EFEMP1+	GOT2
SPHK11	2.63366e-08	1.08861	0.562	0.35	0.000809455	EFEMP1+	SPHK1
GPAA1	2.96325e-08	1.03817	0.526	0.321	0.000910753	EFEMP1+	GPAA1
FLNA	3.01834e-08	0.690622	0.883	0.782	0.000927686	EFEMP1+	FLNA
TRIM28	3.22373e-08	1.02505	0.584	0.384	0.000990814	EFEMP1+	TRIM28
TGM21	3.28424e-08	0.806252	0.832	0.667	0.00100941	EFEMP1+	TGM2
AP2S1	3.87894e-08	0.938254	0.73	0.556	0.00119219	EFEMP1+	AP2S1
SLC41A31	4.18971e-08	0.91809	0.599	0.392	0.00128771	EFEMP1+	SLC41A3
SMAD3	4.42763e-08	1.00555	0.496	0.29	0.00136083	EFEMP1+	SMAD3
CSGALNACT1	4.49025e-08	0.877708	0.672	0.497	0.00138008	EFEMP1+	CSGALNACT1
SYNPO1	4.68645e-08	0.742201	0.723	0.523	0.00144038	EFEMP1+	SYNPO
VARS	4.74893e-08	1.03011	0.416	0.217	0.00145958	EFEMP1+	VARS
MAGED1	4.87352e-08	1.13137	0.445	0.248	0.00149788	EFEMP1+	MAGED1
MYO10	5.19981e-08	0.935969	0.526	0.319	0.00159816	EFEMP1+	MYO10
SLC25A6	5.2481e-08	0.547684	0.869	0.764	0.001613	EFEMP1+	SLC25A6
GSTO1	5.31956e-08	0.76135	0.73	0.599	0.00163497	EFEMP1+	GSTO1
LOXL2	5.70935e-08	1.19102	0.409	0.218	0.00175477	EFEMP1+	LOXL2
NUDT41	6.11115e-08	0.730845	0.606	0.413	0.00187826	EFEMP1+	NUDT4
YBX1	6.33674e-08	0.567277	0.934	0.875	0.0019476	EFEMP1+	YBX1
S100A11	6.35843e-08	0.56117	0.927	0.812	0.00195426	EFEMP1+	S100A11
C71	6.96682e-08	0.5704	0.496	0.272	0.00214125	EFEMP1+	C7
ARL6IP51	7.09387e-08	0.546847	0.876	0.723	0.0021803	EFEMP1+	ARL6IP5
FAM114A11	8.99045e-08	0.953854	0.562	0.362	0.00276321	EFEMP1+	FAM114A1
TST	9.21449e-08	1.09514	0.423	0.227	0.00283207	EFEMP1+	TST
RASSF8	1.09629e-07	0.950536	0.577	0.384	0.00336943	EFEMP1+	RASSF8
PSMC3	1.09699e-07	0.943123	0.642	0.444	0.0033716	EFEMP1+	PSMC3
ECE1	1.13364e-07	0.655766	0.818	0.75	0.00348423	EFEMP1+	ECE1
ODC1	1.13422e-07	0.929736	0.482	0.292	0.00348603	EFEMP1+	ODC1
BCR	1.20336e-07	0.679914	0.745	0.583	0.00369854	EFEMP1+	BCR
MRPL12	1.28399e-07	1.2731	0.46	0.263	0.00394635	EFEMP1+	MRPL12
LARP6	1.56e-07	0.96506	0.438	0.251	0.00479467	EFEMP1+	LARP6
PRKDC	1.59473e-07	0.800138	0.759	0.596	0.00490139	EFEMP1+	PRKDC
CTSZ	1.62423e-07	0.577097	0.737	0.585	0.00499207	EFEMP1+	CTSZ
TRAPPC5	1.76162e-07	0.689557	0.715	0.562	0.00541435	EFEMP1+	TRAPPC5
ATP1B31	2.03756e-07	0.599594	0.796	0.66	0.00626244	EFEMP1+	ATP1B3
NFATC1	2.05332e-07	1.40851	0.482	0.295	0.00631088	EFEMP1+	NFATC1
PMEPA11	2.21521e-07	0.842626	0.54	0.343	0.00680844	EFEMP1+	PMEPA1
MLLT11	2.50265e-07	0.599451	0.533	0.331	0.0076919	EFEMP1+	MLLT1
FKBP10	2.56669e-07	0.926399	0.482	0.297	0.00788872	EFEMP1+	FKBP10
TM9SF3	2.59796e-07	0.526123	0.832	0.681	0.00798483	EFEMP1+	TM9SF3
RABAC1	2.70327e-07	0.552738	0.854	0.746	0.00830851	EFEMP1+	RABAC1
CYB5R3	2.71718e-07	0.539765	0.891	0.765	0.00835127	EFEMP1+	CYB5R3
PPP1R14B	2.7836e-07	0.85723	0.73	0.616	0.00855541	EFEMP1+	PPP1R14B
MIR99AHG1	2.95821e-07	0.897727	0.482	0.268	0.00909205	EFEMP1+	MIR99AHG
WBP1L	3.12847e-07	0.973093	0.482	0.281	0.00961535	EFEMP1+	WBP1L
ACVRL11	3.37794e-07	0.648787	0.745	0.593	0.0103821	EFEMP1+	ACVRL1
LMAN2	3.42266e-07	0.804064	0.679	0.514	0.0105195	EFEMP1+	LMAN2
COL6A2	3.43007e-07	0.848138	0.569	0.379	0.0105423	EFEMP1+	COL6A2
SLC39A7	3.51845e-07	0.935765	0.547	0.361	0.0108139	EFEMP1+	SLC39A7
BSG	3.94753e-07	0.644214	0.759	0.647	0.0121327	EFEMP1+	BSG
BMPR2	3.96204e-07	0.794286	0.854	0.761	0.0121773	EFEMP1+	BMPR2
ZMYND8	4.33609e-07	0.579375	0.591	0.366	0.013327	EFEMP1+	ZMYND8
SRPK1	4.63037e-07	0.860823	0.547	0.357	0.0142314	EFEMP1+	SRPK1
CREB3L21	4.65603e-07	1.02643	0.547	0.365	0.0143103	EFEMP1+	CREB3L2
TMEM255B1	5.15921e-07	0.670499	0.65	0.46	0.0158568	EFEMP1+	TMEM255B
RNF181	5.61718e-07	0.72602	0.635	0.463	0.0172644	EFEMP1+	RNF181
OSTC	5.64327e-07	0.8814	0.701	0.488	0.0173446	EFEMP1+	OSTC
ELL2	5.68172e-07	1.21755	0.46	0.269	0.0174628	EFEMP1+	ELL2
FRMD4B1	6.84193e-07	0.677862	0.737	0.569	0.0210287	EFEMP1+	FRMD4B
MBTPS1	7.40539e-07	0.678142	0.679	0.464	0.0227605	EFEMP1+	MBTPS1
RPN2	7.97266e-07	0.816852	0.715	0.547	0.024504	EFEMP1+	RPN2
GPX8	8.1103e-07	1.08892	0.409	0.237	0.024927	EFEMP1+	GPX8
CD91	8.7192e-07	0.756753	0.832	0.713	0.0267985	EFEMP1+	CD9
EXOC6	9.42388e-07	0.611433	0.642	0.425	0.0289643	EFEMP1+	EXOC6
ZFHX3	1.01094e-06	0.744022	0.467	0.273	0.0310711	EFEMP1+	ZFHX3
NUPR1	1.04526e-06	0.794246	0.62	0.449	0.032126	EFEMP1+	NUPR1
LAMTOR2	1.06677e-06	0.876224	0.62	0.46	0.0327872	EFEMP1+	LAMTOR2
NDUFB11	1.07869e-06	0.694626	0.752	0.589	0.0331535	EFEMP1+	NDUFB11
ST3GAL1	1.12113e-06	0.897481	0.599	0.413	0.0344579	EFEMP1+	ST3GAL1
C4orf48	1.14181e-06	1.0637	0.423	0.238	0.0350935	EFEMP1+	C4orf48
NDUFA11	1.17116e-06	0.619662	0.788	0.658	0.0359957	EFEMP1+	NDUFA11
PHB	1.23189e-06	0.790126	0.599	0.439	0.037862	EFEMP1+	PHB
PARVA1	1.30146e-06	0.981074	0.635	0.459	0.0400003	EFEMP1+	PARVA
RALA	1.30536e-06	1.1079	0.62	0.432	0.0401202	EFEMP1+	RALA
MRPS12	1.35127e-06	0.95462	0.482	0.306	0.0415311	EFEMP1+	MRPS12
PPP1CA	1.45697e-06	0.76842	0.628	0.447	0.0447799	EFEMP1+	PPP1CA
IARS2	1.45717e-06	0.701624	0.62	0.43	0.0447861	EFEMP1+	IARS2
MZT2B	1.46936e-06	0.592327	0.825	0.738	0.0451609	EFEMP1+	MZT2B
ORMDL2	1.49334e-06	0.783054	0.504	0.325	0.045898	EFEMP1+	ORMDL2
SLC16A3	1.591e-06	0.972281	0.474	0.295	0.0488994	EFEMP1+	SLC16A3
SEC31A	1.6114e-06	0.699075	0.73	0.582	0.0495265	EFEMP1+	SEC31A
LGALS11	1.61351e-06	1.11228	0.905	0.807	0.0495911	EFEMP1+	LGALS1
PDLIM5	1.69661e-06	0.700454	0.803	0.669	0.0521453	EFEMP1+	PDLIM5
GPI	1.74364e-06	0.762674	0.526	0.35	0.0535908	EFEMP1+	GPI
MAP7D3	1.75443e-06	1.00204	0.409	0.23	0.0539223	EFEMP1+	MAP7D3
PGF	1.92131e-06	1.40856	0.431	0.26	0.0590515	EFEMP1+	PGF
ALDH21	1.97149e-06	0.6355	0.628	0.445	0.0605937	EFEMP1+	ALDH2
ITGA5	1.9715e-06	0.588618	0.861	0.774	0.0605941	EFEMP1+	ITGA5
DDOST	1.97944e-06	0.745381	0.65	0.467	0.060838	EFEMP1+	DDOST
PAWR	1.98863e-06	0.914461	0.547	0.374	0.0611206	EFEMP1+	PAWR
SUMF2	2.00295e-06	0.799483	0.599	0.416	0.0615607	EFEMP1+	SUMF2
USP3	2.00702e-06	0.798269	0.526	0.335	0.0616858	EFEMP1+	USP3
NDUFAF8	2.10379e-06	0.985457	0.482	0.302	0.0646599	EFEMP1+	NDUFAF8
PTPRE	2.14056e-06	0.685914	0.679	0.501	0.0657901	EFEMP1+	PTPRE
S100A13	2.30678e-06	0.526347	0.832	0.723	0.0708987	EFEMP1+	S100A13
AGPAT2	2.34869e-06	1.06334	0.518	0.337	0.0721869	EFEMP1+	AGPAT2
SRM	2.48865e-06	1.00678	0.547	0.379	0.0764888	EFEMP1+	SRM
CHID1	2.54623e-06	0.954324	0.423	0.252	0.0782585	EFEMP1+	CHID1
LDHB	2.65893e-06	0.763373	0.62	0.486	0.0817222	EFEMP1+	LDHB
KDELR1	2.68779e-06	0.678419	0.774	0.645	0.0826092	EFEMP1+	KDELR1
DPY19L1	2.8727e-06	0.870918	0.482	0.298	0.0882925	EFEMP1+	DPY19L1
CCT5	2.919e-06	0.765649	0.664	0.516	0.0897154	EFEMP1+	CCT5
NHP2	2.94132e-06	0.772945	0.635	0.462	0.0904015	EFEMP1+	NHP2
PRELID1	3.02083e-06	0.944161	0.686	0.556	0.0928453	EFEMP1+	PRELID1
VEGFB	3.06933e-06	0.734695	0.547	0.368	0.0943358	EFEMP1+	VEGFB
CHD3	3.1008e-06	1.05207	0.431	0.263	0.0953032	EFEMP1+	CHD3
SND1	3.12647e-06	0.845585	0.533	0.362	0.096092	EFEMP1+	SND1
HM13	3.16084e-06	0.712604	0.62	0.453	0.0971484	EFEMP1+	HM13
SNTB21	3.1966e-06	0.665878	0.752	0.582	0.0982473	EFEMP1+	SNTB2
INO80C	3.2508e-06	0.925322	0.401	0.224	0.0999134	EFEMP1+	INO80C
EIF5A	3.28839e-06	0.953293	0.686	0.538	0.101069	EFEMP1+	EIF5A
NME1	3.33122e-06	1.28407	0.489	0.32	0.102385	EFEMP1+	NME1
NAXE	3.4156e-06	1.08484	0.401	0.233	0.104978	EFEMP1+	NAXE
IFRD2	3.43878e-06	1.12071	0.445	0.277	0.105691	EFEMP1+	IFRD2
STAB1	3.48104e-06	0.506979	0.701	0.506	0.10699	EFEMP1+	STAB1
GADD45GIP1	3.60053e-06	0.758471	0.686	0.559	0.110662	EFEMP1+	GADD45GIP1
ADD1	3.76218e-06	0.565251	0.847	0.704	0.115631	EFEMP1+	ADD1
TSPAN31	3.8845e-06	0.686271	0.569	0.398	0.11939	EFEMP1+	TSPAN3
NDUFB2	3.9354e-06	0.50799	0.788	0.647	0.120955	EFEMP1+	NDUFB2
TUBB	3.95347e-06	0.764229	0.803	0.691	0.12151	EFEMP1+	TUBB
CLPP	4.03373e-06	0.930914	0.533	0.357	0.123977	EFEMP1+	CLPP
IL321	4.2007e-06	1.00025	0.584	0.409	0.129109	EFEMP1+	IL32
NDUFV1	4.26741e-06	0.747882	0.533	0.36	0.131159	EFEMP1+	NDUFV1
SERPINB9	4.76224e-06	0.901429	0.438	0.267	0.146367	EFEMP1+	SERPINB9
ERRFI1	4.81858e-06	1.04182	0.46	0.292	0.148099	EFEMP1+	ERRFI1
MRPL37	5.14e-06	0.749433	0.467	0.292	0.157978	EFEMP1+	MRPL37
PFN1	5.73662e-06	0.51075	0.861	0.793	0.176315	EFEMP1+	PFN1
PDIA4	6.05484e-06	0.869777	0.533	0.377	0.186096	EFEMP1+	PDIA4
NOP14	6.09303e-06	1.24077	0.438	0.272	0.187269	EFEMP1+	NOP14
ICE2	6.19305e-06	0.640923	0.54	0.341	0.190343	EFEMP1+	ICE2
TMEM123	6.56507e-06	0.590107	0.752	0.632	0.201777	EFEMP1+	TMEM123
RNASEH2C	6.92657e-06	0.690317	0.599	0.458	0.212888	EFEMP1+	RNASEH2C
GPS1	6.97726e-06	0.938474	0.431	0.266	0.214446	EFEMP1+	GPS1
RHOJ	7.54624e-06	0.507055	0.672	0.505	0.231934	EFEMP1+	RHOJ
ATP5MC1	7.92585e-06	0.795062	0.628	0.473	0.243601	EFEMP1+	ATP5MC1
DAAM11	8.36237e-06	0.630946	0.672	0.543	0.257017	EFEMP1+	DAAM1
PSMB6	8.59805e-06	0.593763	0.664	0.513	0.264261	EFEMP1+	PSMB6
GALNT151	8.88375e-06	0.620442	0.664	0.477	0.273042	EFEMP1+	GALNT15
STOML2	9.08803e-06	0.863149	0.533	0.372	0.279321	EFEMP1+	STOML2
HDLBP	9.09174e-06	0.620369	0.693	0.583	0.279435	EFEMP1+	HDLBP
PHPT1	9.29458e-06	0.7193	0.65	0.497	0.285669	EFEMP1+	PHPT1
MPZL1	9.48993e-06	0.690246	0.547	0.381	0.291673	EFEMP1+	MPZL1
RBBP7	9.67748e-06	0.729483	0.562	0.377	0.297437	EFEMP1+	RBBP7
PDE2A1	9.82991e-06	0.547679	0.672	0.477	0.302122	EFEMP1+	PDE2A
PFKL	1.00678e-05	0.654527	0.591	0.431	0.309433	EFEMP1+	PFKL
HNRNPAB	1.12605e-05	0.698224	0.715	0.586	0.34609	EFEMP1+	HNRNPAB
SNHG161	1.19723e-05	0.542098	0.693	0.514	0.367968	EFEMP1+	SNHG16
DEPP12	1.27337e-05	0.65143	0.832	0.729	0.39137	EFEMP1+	DEPP1
TGFB1	1.27509e-05	0.731139	0.679	0.512	0.3919	EFEMP1+	TGFB1
MAP3K201	1.30513e-05	0.785518	0.504	0.342	0.401133	EFEMP1+	MAP3K20
SSR1	1.35589e-05	0.648779	0.642	0.475	0.416732	EFEMP1+	SSR1
NDUFAF3	1.39505e-05	0.747769	0.599	0.433	0.428768	EFEMP1+	NDUFAF3
TIMM13	1.46353e-05	0.914534	0.62	0.467	0.449816	EFEMP1+	TIMM13
LEPR1	1.46684e-05	0.852166	0.555	0.389	0.450832	EFEMP1+	LEPR
POLR2E	1.49667e-05	0.785431	0.591	0.431	0.46	EFEMP1+	POLR2E
HIC1	1.5137e-05	0.639115	0.431	0.265	0.465234	EFEMP1+	HIC1
ALDH1A3	1.54223e-05	0.875289	0.409	0.24	0.474005	EFEMP1+	ALDH1A3
VDAC1	1.58396e-05	0.659871	0.657	0.533	0.486831	EFEMP1+	VDAC1
LTBP31	1.62267e-05	0.696232	0.635	0.501	0.498728	EFEMP1+	LTBP3
ATOX1	1.6967e-05	0.564744	0.745	0.61	0.521482	EFEMP1+	ATOX1
SURF4	1.84713e-05	0.682425	0.569	0.408	0.567717	EFEMP1+	SURF4
EMP31	1.85143e-05	0.797606	0.518	0.332	0.569036	EFEMP1+	EMP3
TMED2	1.88096e-05	0.69901	0.628	0.478	0.578115	EFEMP1+	TMED2
AGTRAP	1.88416e-05	0.981595	0.547	0.375	0.579097	EFEMP1+	AGTRAP
IL13RA11	1.90353e-05	0.52321	0.657	0.501	0.585049	EFEMP1+	IL13RA1
JPT1	1.90492e-05	1.30787	0.423	0.274	0.585477	EFEMP1+	JPT1
S100A16	1.96841e-05	0.522579	0.788	0.67	0.604991	EFEMP1+	S100A16
SDHA	1.9866e-05	0.697824	0.518	0.361	0.610581	EFEMP1+	SDHA
GSPT1	2.05977e-05	0.644136	0.672	0.519	0.633069	EFEMP1+	GSPT1
RAN	2.07954e-05	0.707688	0.766	0.652	0.639145	EFEMP1+	RAN
NDUFS6	2.0915e-05	0.710697	0.686	0.562	0.642824	EFEMP1+	NDUFS6
YIF1A	2.1146e-05	0.830346	0.453	0.299	0.649921	EFEMP1+	YIF1A
CNIH4	2.12662e-05	0.819633	0.577	0.399	0.653617	EFEMP1+	CNIH4
CERK	2.13094e-05	0.928745	0.445	0.296	0.654945	EFEMP1+	CERK
SNRPB	2.23615e-05	0.651756	0.737	0.574	0.68728	EFEMP1+	SNRPB
EIF3I	2.34954e-05	0.607479	0.715	0.593	0.722131	EFEMP1+	EIF3I
ST6GALNAC6	2.36043e-05	0.666409	0.518	0.35	0.725477	EFEMP1+	ST6GALNAC6
FKBP111	2.41073e-05	0.940785	0.526	0.382	0.740938	EFEMP1+	FKBP11
ELOVL1	2.52879e-05	0.531178	0.606	0.422	0.777224	EFEMP1+	ELOVL1
MTX1	2.55049e-05	0.624941	0.416	0.262	0.783893	EFEMP1+	MTX1
WIPI2	2.70385e-05	0.537449	0.547	0.367	0.831027	EFEMP1+	WIPI2
DIPK1B1	2.8058e-05	0.596963	0.642	0.485	0.862361	EFEMP1+	DIPK1B
CALU	2.83715e-05	0.507043	0.759	0.64	0.871999	EFEMP1+	CALU
ABHD21	2.917e-05	0.732037	0.555	0.39	0.89654	EFEMP1+	ABHD2
AFAP11	3.04981e-05	0.527734	0.613	0.43	0.93736	EFEMP1+	AFAP1
CKAP4	3.1047e-05	0.792288	0.496	0.346	0.954229	EFEMP1+	CKAP4
PLPP3	3.13837e-05	0.593175	0.745	0.584	0.964579	EFEMP1+	PLPP3
CCT7	3.15463e-05	0.535757	0.635	0.479	0.969576	EFEMP1+	CCT7
GIPC1	3.48938e-05	0.7676	0.467	0.299	1	EFEMP1+	GIPC1
MTCH2	3.5592e-05	0.95804	0.416	0.257	1	EFEMP1+	MTCH2
DRAP1	3.56999e-05	0.726902	0.642	0.485	1	EFEMP1+	DRAP1
MRPL14	3.63963e-05	1.1389	0.474	0.317	1	EFEMP1+	MRPL14
ADSL	3.90997e-05	0.750862	0.423	0.272	1	EFEMP1+	ADSL
ATP11A	3.92172e-05	0.697483	0.562	0.391	1	EFEMP1+	ATP11A
MAGED2	3.94275e-05	0.555511	0.657	0.512	1	EFEMP1+	MAGED2
AKR7A2	4.01086e-05	0.855896	0.482	0.329	1	EFEMP1+	AKR7A2
TRIP6	4.21861e-05	0.645274	0.409	0.252	1	EFEMP1+	TRIP6
METTL26	4.22864e-05	0.994408	0.555	0.405	1	EFEMP1+	METTL26
MYO5A1	4.36727e-05	0.712582	0.526	0.358	1	EFEMP1+	MYO5A
TUFM	4.4198e-05	0.651564	0.657	0.557	1	EFEMP1+	TUFM
SSH1	4.49181e-05	0.584358	0.518	0.373	1	EFEMP1+	SSH1
TMX3	4.52239e-05	0.570289	0.577	0.412	1	EFEMP1+	TMX3
FAM50A	4.54202e-05	0.600464	0.562	0.399	1	EFEMP1+	FAM50A
IPO5	5.00186e-05	0.715535	0.54	0.388	1	EFEMP1+	IPO5
PFDN6	5.06291e-05	1.09699	0.401	0.249	1	EFEMP1+	PFDN6
PDE4B	5.0833e-05	0.689636	0.518	0.337	1	EFEMP1+	PDE4B
SLC25A39	5.12856e-05	0.648366	0.474	0.317	1	EFEMP1+	SLC25A39
MVP	5.25323e-05	0.77863	0.613	0.465	1	EFEMP1+	MVP
ATP5MF	5.94388e-05	0.569327	0.642	0.501	1	EFEMP1+	ATP5MF
SMIM12	6.28235e-05	0.528434	0.533	0.355	1	EFEMP1+	SMIM12
PDIA51	6.31103e-05	0.739451	0.504	0.34	1	EFEMP1+	PDIA5
PIN1	6.57086e-05	0.585629	0.577	0.41	1	EFEMP1+	PIN1
ISOC2	6.5839e-05	0.902668	0.416	0.259	1	EFEMP1+	ISOC2
NRBP1	6.92884e-05	0.673085	0.584	0.422	1	EFEMP1+	NRBP1
IFNGR2	6.94325e-05	0.512891	0.526	0.37	1	EFEMP1+	IFNGR2
DCTN1	7.29518e-05	0.54402	0.526	0.361	1	EFEMP1+	DCTN1
SLC29A1	7.40659e-05	0.66014	0.54	0.388	1	EFEMP1+	SLC29A1
PSMB3	7.85612e-05	0.551345	0.679	0.543	1	EFEMP1+	PSMB3
PSMD2	7.91052e-05	0.744884	0.555	0.415	1	EFEMP1+	PSMD2
MZT2A	8.00905e-05	0.668944	0.562	0.442	1	EFEMP1+	MZT2A
C9orf16	8.16665e-05	0.527075	0.686	0.623	1	EFEMP1+	C9orf16
CUEDC2	8.175e-05	0.83442	0.533	0.381	1	EFEMP1+	CUEDC2
PRPF31	8.23228e-05	0.716071	0.489	0.339	1	EFEMP1+	PRPF31
ARCN1	8.28728e-05	0.671312	0.613	0.446	1	EFEMP1+	ARCN1
BOLA3	8.37396e-05	0.670284	0.423	0.27	1	EFEMP1+	BOLA3
NCBP2AS2	8.52806e-05	0.656698	0.423	0.274	1	EFEMP1+	NCBP2AS2
PSMD3	8.57798e-05	0.744422	0.504	0.361	1	EFEMP1+	PSMD3
PTPN1	8.57867e-05	0.829691	0.526	0.374	1	EFEMP1+	PTPN1
QARS	8.94057e-05	0.504568	0.547	0.392	1	EFEMP1+	QARS
SRPRA	9.13572e-05	0.68933	0.599	0.46	1	EFEMP1+	SRPRA
NIBAN2	9.28806e-05	0.833518	0.569	0.438	1	EFEMP1+	NIBAN2
EIF6	9.89985e-05	0.696721	0.599	0.462	1	EFEMP1+	EIF6
MCUB	0.000101706	0.641434	0.482	0.319	1	EFEMP1+	MCUB
PLEKHA1	0.00010277	0.509991	0.628	0.471	1	EFEMP1+	PLEKHA1
UBR4	0.00010289	0.594369	0.474	0.307	1	EFEMP1+	UBR4
CHMP2A	0.000103303	0.519927	0.679	0.599	1	EFEMP1+	CHMP2A
EBNA1BP2	0.000104783	1.0936	0.431	0.295	1	EFEMP1+	EBNA1BP2
TLNRD1	0.000105035	0.721257	0.526	0.375	1	EFEMP1+	TLNRD1
IGF1R1	0.00010731	0.605023	0.635	0.484	1	EFEMP1+	IGF1R
PITPNA1	0.000107478	0.54274	0.496	0.342	1	EFEMP1+	PITPNA
EIF2AK1	0.000110894	0.93418	0.504	0.361	1	EFEMP1+	EIF2AK1
RAB29	0.000111679	0.826733	0.46	0.298	1	EFEMP1+	RAB29
PLOD1	0.000113454	0.941898	0.401	0.261	1	EFEMP1+	PLOD1
KDM7A	0.000113524	0.818705	0.438	0.291	1	EFEMP1+	KDM7A
PSMC5	0.000116265	0.564295	0.672	0.54	1	EFEMP1+	PSMC5
TXLNA	0.000120846	0.916658	0.46	0.322	1	EFEMP1+	TXLNA
EIF2B2	0.000123635	1.05976	0.401	0.265	1	EFEMP1+	EIF2B2
RTL8C	0.000125671	0.582899	0.533	0.382	1	EFEMP1+	RTL8C
KIF13A	0.000126086	0.614287	0.54	0.384	1	EFEMP1+	KIF13A
MFSD10	0.000128314	0.56483	0.606	0.455	1	EFEMP1+	MFSD10
MRPL17	0.00012909	0.82734	0.482	0.335	1	EFEMP1+	MRPL17
REX1BD	0.000130158	0.621776	0.62	0.471	1	EFEMP1+	REX1BD
XRCC5	0.000134448	0.500496	0.796	0.681	1	EFEMP1+	XRCC5
NPLOC4	0.00013857	0.532675	0.46	0.31	1	EFEMP1+	NPLOC4
ANAPC11	0.000146994	0.690479	0.591	0.472	1	EFEMP1+	ANAPC11
PSMB10	0.000147912	0.682941	0.474	0.322	1	EFEMP1+	PSMB10
PIM31	0.000148369	0.677731	0.715	0.617	1	EFEMP1+	PIM3
MRPL9	0.000150463	0.617254	0.496	0.348	1	EFEMP1+	MRPL9
PHF10	0.000156519	0.766365	0.533	0.366	1	EFEMP1+	PHF10
MAP2K2	0.000160137	0.51684	0.642	0.51	1	EFEMP1+	MAP2K2
RGS31	0.000166302	0.979906	0.562	0.406	1	EFEMP1+	RGS3
ZDHHC24	0.000168655	0.943544	0.453	0.313	1	EFEMP1+	ZDHHC24
MPG	0.000169516	0.558748	0.599	0.459	1	EFEMP1+	MPG
SNAPC1	0.000171323	0.697675	0.401	0.254	1	EFEMP1+	SNAPC1
ZCCHC17	0.000172678	0.681076	0.482	0.335	1	EFEMP1+	ZCCHC17
STUB1	0.000173813	0.616521	0.635	0.472	1	EFEMP1+	STUB1
KDELR2	0.000177053	0.608813	0.672	0.547	1	EFEMP1+	KDELR2
PRDX5	0.000179449	0.671521	0.672	0.569	1	EFEMP1+	PRDX5
PPM1F	0.000191745	0.60481	0.526	0.379	1	EFEMP1+	PPM1F
AURKAIP1	0.000202301	0.551457	0.642	0.534	1	EFEMP1+	AURKAIP1
NDUFS8	0.000205721	0.658723	0.54	0.43	1	EFEMP1+	NDUFS8
KDM1A	0.000210089	0.717256	0.423	0.276	1	EFEMP1+	KDM1A
ANXA4	0.000225119	0.569361	0.569	0.422	1	EFEMP1+	ANXA4
CENPX	0.000225973	1.06043	0.474	0.335	1	EFEMP1+	CENPX
C1QBP	0.00023141	0.609105	0.635	0.523	1	EFEMP1+	C1QBP
HIVEP1	0.000237876	0.681377	0.511	0.367	1	EFEMP1+	HIVEP1
PLEKHO1	0.000238114	0.860363	0.453	0.307	1	EFEMP1+	PLEKHO1
CHCHD1	0.000240951	0.729234	0.496	0.36	1	EFEMP1+	CHCHD1
PGRMC11	0.000251382	0.659732	0.65	0.556	1	EFEMP1+	PGRMC1
ARL2	0.000253274	0.538994	0.752	0.626	1	EFEMP1+	ARL2
PLIN3	0.000265558	0.529831	0.453	0.303	1	EFEMP1+	PLIN3
PPP1R13L	0.000269788	0.62637	0.401	0.267	1	EFEMP1+	PPP1R13L
COPB2	0.00026989	0.628234	0.584	0.435	1	EFEMP1+	COPB2
DDT	0.000285677	0.505085	0.693	0.555	1	EFEMP1+	DDT
TCN21	0.000300164	0.572154	0.628	0.484	1	EFEMP1+	TCN2
PKD21	0.000301489	0.659128	0.423	0.27	1	EFEMP1+	PKD2
TNFAIP8L1	0.000317014	0.652028	0.504	0.35	1	EFEMP1+	TNFAIP8L1
ANKRD371	0.000320857	0.822137	0.489	0.36	1	EFEMP1+	ANKRD37
GRHPR	0.000322511	0.810842	0.533	0.409	1	EFEMP1+	GRHPR
CLTB	0.000331973	0.563316	0.628	0.506	1	EFEMP1+	CLTB
TMEM208	0.000333289	0.753223	0.489	0.35	1	EFEMP1+	TMEM208
ZBTB8A	0.000416978	0.783738	0.474	0.322	1	EFEMP1+	ZBTB8A
TUBA1C	0.000422171	0.894173	0.474	0.348	1	EFEMP1+	TUBA1C
GOLGA2	0.000424351	0.554297	0.54	0.407	1	EFEMP1+	GOLGA2
CDK6	0.000428344	0.75981	0.423	0.295	1	EFEMP1+	CDK6
PSMB2	0.000432669	0.671759	0.599	0.477	1	EFEMP1+	PSMB2
ZNF5931	0.000438135	0.974419	0.46	0.328	1	EFEMP1+	ZNF593
MPST	0.000453482	0.648176	0.511	0.372	1	EFEMP1+	MPST
ESYT2	0.000458431	0.537081	0.62	0.492	1	EFEMP1+	ESYT2
CCDC3	0.000464735	0.575003	0.445	0.299	1	EFEMP1+	CCDC3
PIGT	0.000473088	0.637932	0.569	0.427	1	EFEMP1+	PIGT
TUBGCP2	0.000481284	0.528103	0.467	0.318	1	EFEMP1+	TUBGCP2
BCAR1	0.000482031	0.743309	0.584	0.451	1	EFEMP1+	BCAR1
MDH2	0.000485323	0.663445	0.606	0.47	1	EFEMP1+	MDH2
SEPHS1	0.000485985	0.806628	0.401	0.267	1	EFEMP1+	SEPHS1
PELI2	0.000499851	0.917082	0.438	0.291	1	EFEMP1+	PELI2
PDHB	0.000513554	0.583386	0.496	0.344	1	EFEMP1+	PDHB
NDUFS7	0.000529476	0.677024	0.584	0.442	1	EFEMP1+	NDUFS7
PDAP1	0.000545029	0.654895	0.635	0.536	1	EFEMP1+	PDAP1
APEX11	0.000552795	0.542439	0.562	0.431	1	EFEMP1+	APEX1
FOXO1	0.000580091	0.640094	0.686	0.589	1	EFEMP1+	FOXO1
PSMD14	0.000583149	0.906524	0.438	0.309	1	EFEMP1+	PSMD14
PDCD2	0.000588593	0.703635	0.489	0.357	1	EFEMP1+	PDCD2
BAG6	0.000605627	0.78477	0.482	0.347	1	EFEMP1+	BAG6
WDR46	0.000619488	0.578477	0.401	0.265	1	EFEMP1+	WDR46
SSRP1	0.000627352	0.56916	0.54	0.397	1	EFEMP1+	SSRP1
TMED10	0.000633543	0.56305	0.693	0.588	1	EFEMP1+	TMED10
SLC25A371	0.000662031	0.502423	0.686	0.579	1	EFEMP1+	SLC25A37
PON21	0.00067497	0.591825	0.628	0.495	1	EFEMP1+	PON2
PIK3R1	0.000679994	0.700394	0.504	0.364	1	EFEMP1+	PIK3R1
TNIP2	0.00069384	0.708937	0.504	0.374	1	EFEMP1+	TNIP2
TIMM8B	0.000703049	0.715176	0.518	0.405	1	EFEMP1+	TIMM8B
COPB1	0.000707407	0.533367	0.62	0.507	1	EFEMP1+	COPB1
KIAA0100	0.000707516	0.590959	0.431	0.302	1	EFEMP1+	KIAA0100
CNPY2	0.000722362	0.577716	0.606	0.492	1	EFEMP1+	CNPY2
AP3D1	0.000748983	0.720407	0.467	0.339	1	EFEMP1+	AP3D1
CENPB	0.000775673	0.503098	0.467	0.334	1	EFEMP1+	CENPB
TSPAN6	0.000779865	0.630272	0.467	0.333	1	EFEMP1+	TSPAN6
HRAS	0.000793743	1.03648	0.431	0.303	1	EFEMP1+	HRAS
PPM1G	0.000805403	0.562901	0.664	0.534	1	EFEMP1+	PPM1G
C1R1	0.000844299	0.665482	0.533	0.379	1	EFEMP1+	C1R
POR1	0.00086898	0.73877	0.431	0.295	1	EFEMP1+	POR
MRPL51	0.000873852	0.561646	0.664	0.543	1	EFEMP1+	MRPL51
EI24	0.000888878	0.651584	0.526	0.415	1	EFEMP1+	EI24
NAGK	0.000893815	0.779524	0.409	0.283	1	EFEMP1+	NAGK
SNX17	0.000895391	0.617194	0.511	0.393	1	EFEMP1+	SNX17
SETD7	0.000956364	0.558052	0.474	0.349	1	EFEMP1+	SETD7
TMEM147	0.000997632	0.6892	0.569	0.455	1	EFEMP1+	TMEM147
ABCC4	0.00100487	0.739884	0.401	0.261	1	EFEMP1+	ABCC4
PSMD1	0.00101017	0.554783	0.569	0.458	1	EFEMP1+	PSMD1
GALNT2	0.00109812	0.576266	0.431	0.302	1	EFEMP1+	GALNT2
LHFPL2	0.00111913	0.70973	0.409	0.278	1	EFEMP1+	LHFPL2
LAPTM4B1	0.00115939	0.511719	0.489	0.367	1	EFEMP1+	LAPTM4B
USP7	0.00117586	0.501512	0.599	0.461	1	EFEMP1+	USP7
VKORC1	0.0011882	0.508973	0.599	0.505	1	EFEMP1+	VKORC1
RER1	0.00120854	0.546944	0.584	0.463	1	EFEMP1+	RER1
TXNL4A	0.00121444	0.701524	0.518	0.401	1	EFEMP1+	TXNL4A
GTF3C6	0.00121494	0.639756	0.504	0.381	1	EFEMP1+	GTF3C6
NCL	0.00126364	0.511766	0.847	0.754	1	EFEMP1+	NCL
UBA1	0.00127208	0.766889	0.438	0.324	1	EFEMP1+	UBA1
2024-03-02	0.00130728	0.640868	0.474	0.358	1	EFEMP1+	2024-03-02
SEC13	0.00131954	0.762277	0.409	0.294	1	EFEMP1+	SEC13
CISD1	0.00133631	0.736921	0.438	0.321	1	EFEMP1+	CISD1
DHX9	0.00136934	0.537106	0.547	0.42	1	EFEMP1+	DHX9
GALNT101	0.00143834	0.560488	0.526	0.379	1	EFEMP1+	GALNT10
PSME2	0.00144851	0.642919	0.642	0.524	1	EFEMP1+	PSME2
NELFCD	0.00145348	0.584072	0.416	0.281	1	EFEMP1+	NELFCD
CD2BP2	0.00147294	0.849273	0.474	0.357	1	EFEMP1+	CD2BP2
PSMD7	0.00148729	0.63704	0.599	0.476	1	EFEMP1+	PSMD7
NDUFV2	0.00149515	0.555514	0.65	0.584	1	EFEMP1+	NDUFV2
MMP24OS	0.00151184	0.57616	0.511	0.37	1	EFEMP1+	MMP24OS
RPP21	0.00161109	0.903737	0.453	0.324	1	EFEMP1+	RPP21
PGM2	0.00161691	0.838941	0.431	0.307	1	EFEMP1+	PGM2
NTHL1	0.00166041	0.501331	0.409	0.281	1	EFEMP1+	NTHL1
PGAM1	0.00172281	0.628165	0.526	0.427	1	EFEMP1+	PGAM1
MRPL28	0.00173295	0.893573	0.46	0.353	1	EFEMP1+	MRPL28
SF3B5	0.00175239	0.50149	0.664	0.549	1	EFEMP1+	SF3B5
ETFB	0.00190709	0.561428	0.555	0.443	1	EFEMP1+	ETFB
PACS1	0.00192173	0.799748	0.416	0.298	1	EFEMP1+	PACS1
MRPL20	0.00192327	0.752488	0.628	0.556	1	EFEMP1+	MRPL20
DUSP6	0.00194889	0.578343	0.686	0.59	1	EFEMP1+	DUSP6
NIPSNAP2	0.00196505	0.502547	0.482	0.361	1	EFEMP1+	NIPSNAP2
COPRS	0.00199588	0.894412	0.467	0.364	1	EFEMP1+	COPRS
BAG1	0.00200164	0.596602	0.62	0.483	1	EFEMP1+	BAG1
UBE2Q1	0.00203619	0.565517	0.511	0.379	1	EFEMP1+	UBE2Q1
IPO7	0.00203627	0.68636	0.65	0.52	1	EFEMP1+	IPO7
BTBD1	0.00225082	0.649428	0.401	0.284	1	EFEMP1+	BTBD1
PRDX4	0.00233859	0.632684	0.555	0.471	1	EFEMP1+	PRDX4
IMMT	0.002424	0.527236	0.482	0.358	1	EFEMP1+	IMMT
PDHA1	0.00249301	0.644725	0.416	0.308	1	EFEMP1+	PDHA1
CAPRIN1	0.00260622	0.514885	0.591	0.493	1	EFEMP1+	CAPRIN1
CCDC25	0.00262795	0.502026	0.599	0.466	1	EFEMP1+	CCDC25
RTCB	0.00269494	0.693217	0.496	0.385	1	EFEMP1+	RTCB
SLC4A7	0.00272144	0.606594	0.467	0.337	1	EFEMP1+	SLC4A7
ATP6V0D1	0.00280995	0.523813	0.416	0.305	1	EFEMP1+	ATP6V0D1
MGAT4B	0.002841	0.557774	0.482	0.375	1	EFEMP1+	MGAT4B
SQOR	0.00287682	0.702361	0.474	0.349	1	EFEMP1+	SQOR
PLEKHA3	0.00291532	0.547659	0.562	0.445	1	EFEMP1+	PLEKHA3
BABAM1	0.00300031	0.990206	0.401	0.291	1	EFEMP1+	BABAM1
WBP4	0.00311987	0.521138	0.511	0.383	1	EFEMP1+	WBP4
RANBP1	0.00312202	0.690378	0.562	0.473	1	EFEMP1+	RANBP1
MYRIP1	0.00314331	0.512044	0.533	0.403	1	EFEMP1+	MYRIP
NDUFB8	0.00331083	0.601426	0.65	0.59	1	EFEMP1+	NDUFB8
FIBP	0.00337076	0.775519	0.482	0.355	1	EFEMP1+	FIBP
PRPF6	0.00350418	0.564789	0.613	0.497	1	EFEMP1+	PRPF6
CFD	0.00393294	1.23841	0.496	0.377	1	EFEMP1+	CFD
PRAF2	0.00394993	0.747644	0.401	0.298	1	EFEMP1+	PRAF2
AGO2	0.00395393	0.500624	0.482	0.37	1	EFEMP1+	AGO2
PCBD1	0.004079	0.581367	0.46	0.345	1	EFEMP1+	PCBD1
SZRD1	0.00409554	0.556567	0.511	0.4	1	EFEMP1+	SZRD1
SMARCD1	0.00424906	0.503608	0.46	0.34	1	EFEMP1+	SMARCD1
BCKDHA	0.00432228	0.660332	0.416	0.307	1	EFEMP1+	BCKDHA
MGMT	0.00479938	0.572198	0.62	0.512	1	EFEMP1+	MGMT
RAB1B	0.00484831	0.56741	0.547	0.439	1	EFEMP1+	RAB1B
UFL1	0.00484936	0.626201	0.504	0.377	1	EFEMP1+	UFL1
ICMT	0.00494292	0.596129	0.401	0.291	1	EFEMP1+	ICMT
ZNRD2	0.00509488	0.766393	0.401	0.306	1	EFEMP1+	ZNRD2
MAPRE2	0.00515521	0.715264	0.416	0.315	1	EFEMP1+	MAPRE2
EVA1B	0.0053095	0.509038	0.599	0.5	1	EFEMP1+	EVA1B
MSRB2	0.00539989	0.523314	0.409	0.291	1	EFEMP1+	MSRB2
IGFBP61	0.00547007	0.803005	0.445	0.326	1	EFEMP1+	IGFBP6
FUCA2	0.00559651	0.752439	0.401	0.296	1	EFEMP1+	FUCA2
HIVEP2	0.00564118	0.543069	0.438	0.326	1	EFEMP1+	HIVEP2
C12orf10	0.00622226	0.569206	0.496	0.383	1	EFEMP1+	C12orf10
PMF1	0.00678028	0.701562	0.438	0.333	1	EFEMP1+	PMF1
MRPL47	0.00735864	0.583189	0.438	0.326	1	EFEMP1+	MRPL47
MSRA	0.00746343	0.505697	0.423	0.326	1	EFEMP1+	MSRA
SRA1	0.00761099	0.769468	0.409	0.297	1	EFEMP1+	SRA1
POLR2I	0.00804933	0.526258	0.577	0.481	1	EFEMP1+	POLR2I
NDUFA9	0.00870661	0.705415	0.431	0.34	1	EFEMP1+	NDUFA9
PGP	0.00889027	0.688142	0.416	0.311	1	EFEMP1+	PGP
SLC30A7	0.00890082	0.587283	0.467	0.345	1	EFEMP1+	SLC30A7
NAB1	0.00925262	0.525854	0.401	0.298	1	EFEMP1+	NAB1
FBXO9	0.00931182	0.68525	0.431	0.333	1	EFEMP1+	FBXO9
EIF2S1	0.00946724	0.533288	0.526	0.411	1	EFEMP1+	EIF2S1
CDC40	0.00981589	0.554243	0.46	0.348	1	EFEMP1+	CDC40
PKHD1L1	2.75193e-233	7.52749	0.907	0.021	8.45807e-229	PROX1+	PKHD1L1
SEMA3A	2.58602e-229	8.46947	0.794	0.01	7.94813e-225	PROX1+	SEMA3A
CCL21	5.01235e-217	11.1065	0.784	0.013	1.54054e-212	PROX1+	CCL21
PROX1	2.08314e-203	7.19933	0.959	0.043	6.40253e-199	PROX1+	PROX1
RELN	3.46643e-177	6.87639	0.722	0.018	1.06541e-172	PROX1+	RELN
NR2F1	3.14262e-160	7.27974	0.773	0.034	9.65884e-156	PROX1+	NR2F1
PIEZO2	1.73458e-152	9.47199	0.505	0.004	5.33123e-148	PROX1+	PIEZO2
ADGRG3	2.81254e-148	7.86471	0.546	0.009	8.64436e-144	PROX1+	ADGRG3
PDPN	2.37225e-141	7.25634	0.588	0.015	7.29112e-137	PROX1+	PDPN
CHRDL1	2.61237e-140	5.17744	0.691	0.029	8.0291e-136	PROX1+	CHRDL1
STON2	1.73784e-135	6.7963	0.536	0.011	5.34125e-131	PROX1+	STON2
MRC1	2.19069e-130	5.24431	0.773	0.051	6.73307e-126	PROX1+	MRC1
TC2N	5.4063e-129	6.22625	0.722	0.043	1.66163e-124	PROX1+	TC2N
TFF3	6.65864e-119	7.25614	0.938	0.121	2.04653e-114	PROX1+	TFF3
LYVE1	1.68535e-116	7.00895	0.773	0.067	5.17994e-112	PROX1+	LYVE1
PARD6G	1.06623e-109	5.23261	0.701	0.052	3.27707e-105	PROX1+	PARD6G
MAF	5.1828e-103	5.94968	0.794	0.089	1.59293e-98	PROX1+	MAF
VAV3	1.37453e-100	5.91323	0.598	0.038	4.22461e-96	PROX1+	VAV3
KBTBD11	1.60485e-100	5.8214	0.66	0.051	4.93249e-96	PROX1+	KBTBD11
STXBP6	5.89815e-98	5.91259	0.557	0.032	1.8128e-93	PROX1+	STXBP6
TSPAN5	5.14768e-92	4.89539	0.773	0.097	1.58214e-87	PROX1+	TSPAN5
PDE1A	4.54499e-88	4.6952	0.619	0.051	1.3969e-83	PROX1+	PDE1A
MPP7	3.76163e-86	4.91046	0.557	0.039	1.15614e-81	PROX1+	MPP7
REEP1	1.1865e-76	5.14353	0.433	0.023	3.64671e-72	PROX1+	REEP1
SEMA3D	1.95323e-76	5.66712	0.412	0.02	6.00325e-72	PROX1+	SEMA3D
B3GNT7	1.28516e-75	5.14612	0.402	0.019	3.94994e-71	PROX1+	B3GNT7
NTS	8.64678e-74	4.94373	0.433	0.025	2.65759e-69	PROX1+	NTS
FAM102A	7.41164e-73	4.81979	0.588	0.061	2.27797e-68	PROX1+	FAM102A
AC007998.3	2.05856e-68	5.30052	0.515	0.048	6.32699e-64	PROX1+	AC007998.3
KLHL4	1.1252e-67	4.7649	0.474	0.037	3.45831e-63	PROX1+	KLHL4
EFNA5	5.59461e-65	3.81029	0.536	0.053	1.7195e-60	PROX1+	EFNA5
TTN	2.67776e-64	5.64989	0.464	0.038	8.2301e-60	PROX1+	TTN
COLEC12	4.96449e-64	4.0342	0.629	0.085	1.52583e-59	PROX1+	COLEC12
RCSD1	5.43279e-64	4.813	0.536	0.058	1.66977e-59	PROX1+	RCSD1
LAPTM5	6.54125e-60	3.76459	0.804	0.192	2.01045e-55	PROX1+	LAPTM5
PPFIBP1	9.48939e-60	3.41475	1	0.616	2.91656e-55	PROX1+	PPFIBP1
SLC24A1	1.67976e-59	4.24768	0.608	0.088	5.16274e-55	PROX1+	SLC24A1
NR2F1-AS1	5.19047e-58	4.87857	0.412	0.033	1.59529e-53	PROX1+	NR2F1-AS1
SYNM	9.56579e-56	3.74662	0.701	0.14	2.94005e-51	PROX1+	SYNM
EDNRB	1.94136e-55	3.32798	0.835	0.224	5.96677e-51	PROX1+	EDNRB
FAM174B	4.46554e-54	4.21583	0.474	0.052	1.37248e-49	PROX1+	FAM174B
TFPI	5.32983e-54	3.42975	1	0.662	1.63812e-49	PROX1+	TFPI
MMRN11	1.68155e-53	3.53251	1	0.591	5.16823e-49	PROX1+	MMRN1
IGF1	2.38892e-51	4.29797	0.536	0.075	7.34235e-47	PROX1+	IGF1
LAYN	3.54292e-49	3.59808	0.784	0.244	1.08892e-44	PROX1+	LAYN
PRKAA2	5.11837e-49	3.92303	0.433	0.046	1.57313e-44	PROX1+	PRKAA2
PLIN5	4.12211e-47	3.89066	0.546	0.089	1.26693e-42	PROX1+	PLIN5
DOCK5	5.1484e-45	4.16474	0.474	0.065	1.58236e-40	PROX1+	DOCK5
SLCO2B1	6.47634e-45	3.8421	0.505	0.077	1.9905e-40	PROX1+	SLCO2B1
GPM6A1	3.55371e-44	3.01678	0.619	0.121	1.09223e-39	PROX1+	GPM6A
MAP4K2	3.89199e-44	3.6591	0.546	0.095	1.1962e-39	PROX1+	MAP4K2
PTX3	1.90026e-43	3.86212	0.454	0.062	5.84044e-39	PROX1+	PTX3
CCDC102B	6.90535e-43	5.09364	0.433	0.057	2.12236e-38	PROX1+	CCDC102B
SCN3B	1.46067e-41	3.80692	0.619	0.147	4.48936e-37	PROX1+	SCN3B
DSP	1.23969e-40	3.36331	0.732	0.234	3.81019e-36	PROX1+	DSP
GJC2	1.30033e-40	3.66766	0.608	0.144	3.99657e-36	PROX1+	GJC2
PPP1R2	2.97006e-40	2.39662	0.907	0.54	9.12849e-36	PROX1+	PPP1R2
NR2F22	9.45423e-40	2.06983	0.969	0.624	2.90576e-35	PROX1+	NR2F2
ADD3	3.29967e-39	2.77603	0.845	0.363	1.01415e-34	PROX1+	ADD3
FLT4	5.18383e-39	3.5088	0.66	0.177	1.59325e-34	PROX1+	FLT4
GYPC1	1.0989e-38	2.93597	0.804	0.351	3.37748e-34	PROX1+	GYPC
ANTXR2	1.27097e-38	3.7399	0.485	0.083	3.90632e-34	PROX1+	ANTXR2
EPB41L2	1.29094e-38	2.55941	0.866	0.42	3.9677e-34	PROX1+	EPB41L2
TBX11	8.4095e-37	2.44228	0.711	0.195	2.58466e-32	PROX1+	TBX1
RAB11FIP12	1.12224e-36	2.53541	0.784	0.287	3.44921e-32	PROX1+	RAB11FIP1
AKAP121	9.13409e-36	2.33419	0.928	0.487	2.80736e-31	PROX1+	AKAP12
FGL21	2.86804e-35	3.00435	0.732	0.256	8.81492e-31	PROX1+	FGL2
FXYD62	9.20925e-35	2.74555	0.753	0.274	2.83046e-30	PROX1+	FXYD6
WFS1	2.03793e-34	2.57591	0.701	0.223	6.26358e-30	PROX1+	WFS1
PTPRE1	3.7171e-34	2.31711	0.876	0.493	1.14245e-29	PROX1+	PTPRE
GRAP	1.26236e-33	3.33844	0.464	0.089	3.87985e-29	PROX1+	GRAP
SLC22A23	1.83352e-33	3.26587	0.474	0.089	5.63533e-29	PROX1+	SLC22A23
ANGPT2	2.10799e-33	3.17778	0.773	0.282	6.47891e-29	PROX1+	ANGPT2
KCTD17	2.20582e-33	3.60997	0.526	0.123	6.7796e-29	PROX1+	KCTD17
PLCE1	3.7608e-32	3.27733	0.412	0.069	1.15588e-27	PROX1+	PLCE1
FOXC21	5.64742e-32	3.41826	0.567	0.134	1.73573e-27	PROX1+	FOXC2
TNFAIP8L3	8.44887e-32	3.45484	0.454	0.089	2.59676e-27	PROX1+	TNFAIP8L3
SLC38A11	6.40565e-30	2.52911	0.742	0.292	1.96878e-25	PROX1+	SLC38A1
SNCA	6.35853e-29	3.04752	0.515	0.128	1.95429e-24	PROX1+	SNCA
EFCC1	1.76928e-28	3.7567	0.402	0.077	5.43787e-24	PROX1+	EFCC1
UNC5B	2.39497e-28	3.31333	0.402	0.075	7.36093e-24	PROX1+	UNC5B
MICAL2	3.59943e-28	2.43023	0.505	0.12	1.10629e-23	PROX1+	MICAL2
JUP1	6.82421e-27	2.46201	0.68	0.282	2.09742e-22	PROX1+	JUP
RASGRP3	7.70069e-27	3.0487	0.629	0.218	2.36681e-22	PROX1+	RASGRP3
ARL4A1	8.36015e-27	1.5618	0.948	0.676	2.56949e-22	PROX1+	ARL4A
S100A10	9.71613e-27	1.34638	0.979	0.905	2.98625e-22	PROX1+	S100A10
APP	2.2387e-26	1.32634	0.979	0.863	6.88064e-22	PROX1+	APP
COL6A21	2.80621e-26	1.9808	0.794	0.369	8.6249e-22	PROX1+	COL6A2
PCDH12	3.25186e-26	3.07316	0.515	0.143	9.99458e-22	PROX1+	PCDH12
SEMA6A1	5.35313e-26	2.16883	0.804	0.405	1.64528e-21	PROX1+	SEMA6A
VPS35L	1.86809e-25	2.78689	0.629	0.25	5.74157e-21	PROX1+	VPS35L
POLR2L	2.59251e-25	1.46331	0.918	0.712	7.96807e-21	PROX1+	POLR2L
GNG111	3.74236e-25	1.34093	0.979	0.836	1.15021e-20	PROX1+	GNG11
FAM107B1	8.65587e-25	2.35321	0.722	0.327	2.66038e-20	PROX1+	FAM107B
LOX	9.95066e-25	3.09605	0.526	0.152	3.05834e-20	PROX1+	LOX
LINC02802	1.12348e-24	2.98308	0.423	0.097	3.453e-20	PROX1+	LINC02802
CTDSPL	1.19729e-24	2.86541	0.577	0.198	3.67986e-20	PROX1+	CTDSPL
NRP2	1.23415e-24	2.22356	0.835	0.505	3.79317e-20	PROX1+	NRP2
ATP5F1E	1.61751e-24	1.17473	0.969	0.901	4.97141e-20	PROX1+	ATP5F1E
DMTN	4.79269e-24	3.08177	0.464	0.124	1.47303e-19	PROX1+	DMTN
GMFG	7.51892e-24	2.00143	0.773	0.42	2.31094e-19	PROX1+	GMFG
CYBA	9.52395e-24	2.54485	0.691	0.33	2.92719e-19	PROX1+	CYBA
CTSZ1	1.34641e-23	1.7621	0.835	0.583	4.13819e-19	PROX1+	CTSZ
CD47	1.47135e-23	1.84643	0.784	0.447	4.52221e-19	PROX1+	CD47
PHLDB2	2.02577e-23	2.48042	0.66	0.269	6.22619e-19	PROX1+	PHLDB2
TSTA3	3.74312e-23	2.57004	0.67	0.315	1.15045e-18	PROX1+	TSTA3
EFEMP12	4.63083e-23	1.22511	0.804	0.323	1.42329e-18	PROX1+	EFEMP1
SCNN1B	1.52172e-22	2.17304	0.577	0.194	4.677e-18	PROX1+	SCNN1B
AFAP1L1	1.6313e-22	2.25023	0.732	0.398	5.01381e-18	PROX1+	AFAP1L1
PGM5	2.02097e-22	1.7129	0.835	0.541	6.21145e-18	PROX1+	PGM5
PALM	2.38163e-22	2.65477	0.608	0.246	7.31995e-18	PROX1+	PALM
LYN	2.90489e-22	2.51884	0.619	0.256	8.92817e-18	PROX1+	LYN
CD92	3.77701e-22	1.35873	0.928	0.71	1.16086e-17	PROX1+	CD9
PALD1	4.17927e-22	2.48001	0.495	0.145	1.2845e-17	PROX1+	PALD1
KANK31	5.21737e-22	1.84269	0.773	0.459	1.60356e-17	PROX1+	KANK3
LIMS11	1.62588e-21	1.32046	0.918	0.741	4.99713e-17	PROX1+	LIMS1
F2RL3	5.07594e-21	2.51129	0.526	0.172	1.56009e-16	PROX1+	F2RL3
TIMP21	1.58516e-20	1.48736	0.876	0.664	4.87199e-16	PROX1+	TIMP2
ZDHHC14	1.78364e-19	2.25145	0.567	0.212	5.48201e-15	PROX1+	ZDHHC14
KRT181	2.0173e-19	2.33794	0.598	0.268	6.20018e-15	PROX1+	KRT18
APOD1	2.3207e-19	1.96171	0.732	0.409	7.13266e-15	PROX1+	APOD
RAB3IL1	2.70465e-19	3.00756	0.412	0.117	8.31274e-15	PROX1+	RAB3IL1
TGFBR21	5.24627e-19	1.05954	0.99	0.842	1.61244e-14	PROX1+	TGFBR2
MARCKS1	6.62923e-19	1.35544	0.866	0.654	2.0375e-14	PROX1+	MARCKS
C6orf141	9.61637e-19	2.38474	0.495	0.168	2.95559e-14	PROX1+	C6orf141
HOXD9	1.07627e-18	2.52278	0.495	0.175	3.30791e-14	PROX1+	HOXD9
HOMER3	1.13399e-18	2.30425	0.567	0.233	3.48533e-14	PROX1+	HOMER3
KDR1	1.30707e-18	2.04434	0.753	0.429	4.01729e-14	PROX1+	KDR
SIRPA	2.54469e-18	2.10284	0.639	0.289	7.8211e-14	PROX1+	SIRPA
GNAS	3.81088e-18	1.26447	0.969	0.941	1.17128e-13	PROX1+	GNAS
N4BP3	4.70572e-18	2.49596	0.423	0.121	1.4463e-13	PROX1+	N4BP3
MAN1A1	5.17699e-18	1.87697	0.804	0.539	1.59115e-13	PROX1+	MAN1A1
RHOJ1	9.76201e-18	1.52778	0.784	0.502	3.00035e-13	PROX1+	RHOJ
REEP3	1.17659e-17	1.76039	0.711	0.418	3.61626e-13	PROX1+	REEP3
CHST15	1.20133e-17	2.57405	0.588	0.265	3.69228e-13	PROX1+	CHST15
BMP2K	1.66817e-17	2.31345	0.505	0.187	5.12713e-13	PROX1+	BMP2K
RAB11A	2.21031e-17	1.10029	0.856	0.716	6.79337e-13	PROX1+	RAB11A
CCND11	2.57852e-17	1.80812	0.691	0.351	7.92508e-13	PROX1+	CCND1
MGAT5	5.30517e-17	2.30378	0.495	0.181	1.63054e-12	PROX1+	MGAT5
TMEM50A	7.58346e-17	1.37671	0.804	0.635	2.33078e-12	PROX1+	TMEM50A
ISG20	1.13138e-16	3.0286	0.505	0.215	3.47728e-12	PROX1+	ISG20
NUPR11	1.52973e-16	1.75744	0.722	0.447	4.70163e-12	PROX1+	NUPR1
TLE11	1.6358e-16	1.35754	0.753	0.451	5.02762e-12	PROX1+	TLE1
ELK3	1.77019e-16	1.29563	0.928	0.798	5.44069e-12	PROX1+	ELK3
ANXA2	2.13822e-16	0.842291	0.969	0.891	6.57181e-12	PROX1+	ANXA2
CLDN51	3.55738e-16	1.15514	0.948	0.766	1.09336e-11	PROX1+	CLDN5
SMAD1	4.19818e-16	1.66422	0.773	0.533	1.29031e-11	PROX1+	SMAD1
CD82	6.69747e-16	2.27605	0.423	0.135	2.05847e-11	PROX1+	CD82
FLNC	1.33336e-15	1.49371	0.526	0.196	4.09809e-11	PROX1+	FLNC
LAMA41	1.33425e-15	1.33846	0.784	0.483	4.10082e-11	PROX1+	LAMA4
SHC2	1.93341e-15	2.48544	0.454	0.17	5.94233e-11	PROX1+	SHC2
FAM189A2	2.12848e-15	1.61562	0.557	0.229	6.54188e-11	PROX1+	FAM189A2
SNCG	2.16456e-15	1.59604	0.804	0.644	6.65276e-11	PROX1+	SNCG
ARL6IP11	3.3785e-15	0.957307	0.876	0.738	1.03838e-10	PROX1+	ARL6IP1
RAB31	3.88298e-15	2.37641	0.433	0.153	1.19344e-10	PROX1+	RAB31
SHC1	5.24593e-15	1.43901	0.763	0.551	1.61234e-10	PROX1+	SHC1
DKK32	5.59076e-15	1.23982	0.557	0.199	1.71832e-10	PROX1+	DKK3
CHCHD10	7.78471e-15	2.14284	0.505	0.212	2.39263e-10	PROX1+	CHCHD10
SLC27A3	8.47618e-15	2.27907	0.577	0.296	2.60515e-10	PROX1+	SLC27A3
SGCE1	9.83797e-15	1.62103	0.526	0.2	3.0237e-10	PROX1+	SGCE
HOXD8	1.05455e-14	1.9589	0.608	0.332	3.24114e-10	PROX1+	HOXD8
ANKS1A	1.13305e-14	1.77291	0.598	0.28	3.48243e-10	PROX1+	ANKS1A
ABI3BP1	1.1862e-14	1.31029	0.546	0.21	3.6458e-10	PROX1+	ABI3BP
RECK	1.34583e-14	1.92888	0.505	0.206	4.1364e-10	PROX1+	RECK
F81	1.47749e-14	1.30377	0.722	0.364	4.54107e-10	PROX1+	F8
DAPK1	1.58767e-14	1.72355	0.515	0.202	4.87971e-10	PROX1+	DAPK1
TPM4	3.8657e-14	0.801402	0.979	0.881	1.18812e-09	PROX1+	TPM4
OAF	7.65207e-14	2.54249	0.495	0.229	2.35186e-09	PROX1+	OAF
CAVIN21	8.15981e-14	0.997926	0.907	0.791	2.50792e-09	PROX1+	CAVIN2
LRPAP1	1.16627e-13	1.35181	0.742	0.536	3.58452e-09	PROX1+	LRPAP1
NT5C	2.15503e-13	2.03232	0.505	0.232	6.62349e-09	PROX1+	NT5C
PACSIN2	2.85826e-13	1.73882	0.649	0.374	8.78488e-09	PROX1+	PACSIN2
PLAC9	3.67292e-13	1.81856	0.691	0.462	1.12887e-08	PROX1+	PLAC9
TNFAIP8L11	4.20571e-13	1.57676	0.629	0.346	1.29262e-08	PROX1+	TNFAIP8L1
RASSF91	5.26615e-13	1.5937	0.629	0.352	1.61855e-08	PROX1+	RASSF9
USP13	6.63089e-13	1.8675	0.402	0.145	2.038e-08	PROX1+	USP13
PDE4B1	6.7738e-13	1.49844	0.629	0.335	2.08193e-08	PROX1+	PDE4B
CALM1	9.52189e-13	0.633675	0.948	0.92	2.92655e-08	PROX1+	CALM1
HEBP1	1.01472e-12	1.5963	0.67	0.464	3.11874e-08	PROX1+	HEBP1
FSCN1	1.19264e-12	1.45709	0.66	0.415	3.66558e-08	PROX1+	FSCN1
HYAL21	1.65382e-12	1.21232	0.845	0.756	5.08302e-08	PROX1+	HYAL2
KANK2	1.97449e-12	2.04512	0.495	0.221	6.06859e-08	PROX1+	KANK2
DAD1	2.58303e-12	1.02117	0.763	0.674	7.93895e-08	PROX1+	DAD1
ZNF467	3.15441e-12	2.07522	0.505	0.24	9.69508e-08	PROX1+	ZNF467
SNX2	3.36065e-12	1.63851	0.629	0.405	1.0329e-07	PROX1+	SNX2
CXXC5	5.79485e-12	1.81705	0.557	0.305	1.78105e-07	PROX1+	CXXC5
CD631	5.90253e-12	0.676286	0.928	0.901	1.81414e-07	PROX1+	CD63
PEPD	6.75562e-12	1.6301	0.598	0.374	2.07634e-07	PROX1+	PEPD
BCL7C	7.54861e-12	1.65811	0.629	0.422	2.32007e-07	PROX1+	BCL7C
PDGFA1	9.91372e-12	1.64603	0.505	0.242	3.04698e-07	PROX1+	PDGFA
TMOD2	1.00048e-11	1.73775	0.515	0.245	3.07499e-07	PROX1+	TMOD2
CD99	1.08133e-11	0.70149	0.928	0.804	3.32347e-07	PROX1+	CD99
EPHX1	1.29156e-11	1.28134	0.732	0.495	3.96962e-07	PROX1+	EPHX1
ST6GALNAC3	1.30263e-11	1.44869	0.629	0.344	4.00364e-07	PROX1+	ST6GALNAC3
CD302	1.31621e-11	1.62423	0.649	0.38	4.04537e-07	PROX1+	CD302
TMOD12	1.38642e-11	1.1587	0.526	0.223	4.26116e-07	PROX1+	TMOD1
SELENOP	1.68607e-11	1.20219	0.753	0.617	5.18214e-07	PROX1+	SELENOP
MAML2	2.36276e-11	1.71955	0.608	0.344	7.26195e-07	PROX1+	MAML2
ETFB1	2.45597e-11	1.32503	0.66	0.439	7.54842e-07	PROX1+	ETFB
NTAN1	2.90434e-11	1.49155	0.639	0.427	8.92649e-07	PROX1+	NTAN1
TGFBRAP1	2.90741e-11	1.90308	0.423	0.174	8.93593e-07	PROX1+	TGFBRAP1
ITGA11	3.17403e-11	1.07835	0.742	0.471	9.75538e-07	PROX1+	ITGA1
CSTB	3.50956e-11	1.03396	0.784	0.628	1.07866e-06	PROX1+	CSTB
ITGA9	4.06981e-11	1.903	0.567	0.302	1.25086e-06	PROX1+	ITGA9
KIAA1324L	4.0911e-11	2.16962	0.505	0.238	1.2574e-06	PROX1+	KIAA1324L
LHFPL6	4.71775e-11	0.872566	0.794	0.585	1.45e-06	PROX1+	LHFPL6
MARCKSL11	4.78947e-11	1.46074	0.67	0.485	1.47204e-06	PROX1+	MARCKSL1
MARVELD11	4.96283e-11	1.64896	0.423	0.174	1.52533e-06	PROX1+	MARVELD1
DYNLL1	5.0617e-11	0.873407	0.845	0.784	1.55571e-06	PROX1+	DYNLL1
NARF	5.51738e-11	1.54405	0.639	0.398	1.69577e-06	PROX1+	NARF
SMAGP1	6.42596e-11	1.47651	0.546	0.312	1.97502e-06	PROX1+	SMAGP
INSIG2	7.04109e-11	2.02612	0.402	0.162	2.16408e-06	PROX1+	INSIG2
SELENOW1	8.36491e-11	0.920269	0.928	0.881	2.57096e-06	PROX1+	SELENOW
SLC38A2	9.40756e-11	0.972847	0.907	0.814	2.89141e-06	PROX1+	SLC38A2
IQSEC1	1.03983e-10	2.0204	0.495	0.251	3.19592e-06	PROX1+	IQSEC1
STX7	1.08252e-10	1.53505	0.66	0.392	3.32711e-06	PROX1+	STX7
GGA1	1.12486e-10	1.57836	0.526	0.27	3.45726e-06	PROX1+	GGA1
CNN31	1.17709e-10	0.931977	0.856	0.691	3.61779e-06	PROX1+	CNN3
REXO2	1.4494e-10	1.34014	0.711	0.525	4.45472e-06	PROX1+	REXO2
STOX2	1.48314e-10	1.57648	0.495	0.232	4.55842e-06	PROX1+	STOX2
C12orf57	1.63973e-10	1.005	0.773	0.628	5.03971e-06	PROX1+	C12orf57
SCARB2	1.777e-10	1.19376	0.784	0.602	5.4616e-06	PROX1+	SCARB2
PROCR2	2.0163e-10	1.31265	0.639	0.38	6.19709e-06	PROX1+	PROCR
CDC42EP5	2.12798e-10	1.1478	0.732	0.616	6.54034e-06	PROX1+	CDC42EP5
MGST3	2.5576e-10	0.851608	0.835	0.737	7.86079e-06	PROX1+	MGST3
PLPP11	2.65161e-10	0.957961	0.814	0.591	8.14972e-06	PROX1+	PLPP1
TMED31	2.65236e-10	1.97633	0.412	0.186	8.15204e-06	PROX1+	TMED3
C17orf58	3.45501e-10	1.96603	0.433	0.2	1.0619e-05	PROX1+	C17orf58
GGT5	3.74552e-10	1.44416	0.608	0.377	1.15119e-05	PROX1+	GGT5
BTBD3	4.28361e-10	1.7126	0.485	0.236	1.31657e-05	PROX1+	BTBD3
RNASEH2C1	4.94098e-10	1.13158	0.67	0.457	1.51861e-05	PROX1+	RNASEH2C
[truncated: 1,238 more rows]

## Sheet: Data Set S3 (ContSMC VeinvsArt)
	p_val	avg_log2FC	pct.1	pct.2	p_val_adj	direction	gene
NFIA	0	-1.50451	0.646	0.96	0	Artery	NFIA
ADAMTS4	0	1.42003	0.441	0.032	0	Vein	ADAMTS4
RGS5	0	-2.03756	0.432	0.972	0	Artery	RGS5
NMNAT2	0	0.610894	0.393	0.006	0	Vein	NMNAT2
ID2	0	-2.60965	0.386	0.95	0	Artery	ID2
ADCY3	0	0.943363	0.599	0.13	0	Vein	ADCY3
SLC38A11	0	0.561811	0.243	0.002	0	Vein	SLC38A11
SCN3A	0	0.726935	0.374	0.034	0	Vein	SCN3A
FN1	0	-1.8326	0.677	0.985	0	Artery	FN1
GRIP2	0	0.669196	0.4	0.021	0	Vein	GRIP2
ENTPD3	0	0.507969	0.293	0.01	0	Vein	ENTPD3
COL8A1	0	-2.14429	0.022	0.868	0	Artery	COL8A1
PCDH7	0	-1.48932	0.004	0.739	0	Artery	PCDH7
SPARCL1	0	2.28153	0.977	0.984	0	Vein	SPARCL1
ENPEP	0	0.514892	0.245	0.001	0	Vein	ENPEP
SYNPO2	0	-2.08191	0.775	0.98	0	Artery	SYNPO2
SELENOP	0	0.920574	0.615	0.137	0	Vein	SELENOP
BMP5	0	0.326472	0.225	0.003	0	Vein	BMP5
TES	0	-1.45349	0.033	0.764	0	Artery	TES
EBF2	0	0.647581	0.429	0.046	0	Vein	EBF2
FABP4	0	2.53913	0.869	0.052	0	Vein	FABP4
CCN3	0	-2.84755	0.175	0.911	0	Artery	CCN3
DOCK8	0	0.520444	0.326	0.008	0	Vein	DOCK8
OLFML2A	0	0.842334	0.497	0.011	0	Vein	OLFML2A
NRARP	0	1.75935	0.594	0.008	0	Vein	NRARP
ADRA2A	0	1.95895	0.527	0.014	0	Vein	ADRA2A
PHLDA2	0	2.53065	0.836	0.091	0	Vein	PHLDA2
PRPH	0	1.4475	0.481	0.004	0	Vein	PRPH
NDUFA4L2	0	2.95244	0.744	0.129	0	Vein	NDUFA4L2
CPM	0	1.64673	0.664	0.019	0	Vein	CPM
CLMN	0	1.6587	0.821	0.135	0	Vein	CLMN
CBLN1	0	0.96705	0.362	0	0	Vein	CBLN1
CRISPLD2	0	2.00606	0.885	0.305	0	Vein	CRISPLD2
SERPINF1	0	2.11181	0.863	0.142	0	Vein	SERPINF1
MYH10	0	-2.23899	0.13	0.902	0	Artery	MYH10
ADAP2	0	0.426042	0.274	0.006	0	Vein	ADAP2
TBX2	0	1.85127	0.882	0.385	0	Vein	TBX2
ANKRD29	0	0.820534	0.465	0.008	0	Vein	ANKRD29
PALM	0	0.367067	0.233	0.005	0	Vein	PALM
COL5A3	0	0.6193	0.364	0.007	0	Vein	COL5A3
BST2	0	0.882199	0.557	0.069	0	Vein	BST2
TCF15	0	0.629594	0.239	0.001	0	Vein	TCF15
COX4I2	0	1.23054	0.555	0.003	0	Vein	COX4I2
TGM2	0	-3.07083	0.232	0.942	0	Artery	TGM2
CCN5	0	-3.09044	0.167	0.85	0	Artery	CCN5
MT-ND3	0	-1.56656	0.987	0.999	0	Artery	MT-ND3
ATP1B2	7.67E-307	0.50896	0.298	0.017	2.36E-302	Vein	ATP1B2
NES	1.43E-306	0.702481	0.411	0.048	4.41E-302	Vein	NES
S100A4	3.17E-306	2.179	0.961	0.715	9.73E-302	Vein	S100A4
ADARB1	4.97E-306	-1.36774	0.171	0.845	1.53E-301	Artery	ADARB1
GPR4	3.99E-301	0.395394	0.201	0.001	1.23E-296	Vein	GPR4
AC100803.4	4.26E-294	0.740981	0.342	0.03	1.31E-289	Vein	AC100803.4
PRUNE2	1.93E-293	-1.5751	0.307	0.894	5.92E-289	Artery	PRUNE2
SYT1	8.29E-293	0.378838	0.217	0.004	2.55E-288	Vein	SYT1
SORBS1	1.32E-292	-1.51398	0.58	0.945	4.06E-288	Artery	SORBS1
PDE4D	1.19E-291	-1.28305	0.048	0.751	3.67E-287	Artery	PDE4D
PTGIS	3.05E-290	-1.29383	0.07	0.759	9.38E-286	Artery	PTGIS
RERGL	1.16E-289	1.97561	0.901	0.505	3.56E-285	Vein	RERGL
KIAA1217	9.02E-288	0.361502	0.246	0.009	2.77E-283	Vein	KIAA1217
RASSF3	2.83E-287	-1.51236	0.27	0.843	8.69E-283	Artery	RASSF3
GJA4	5.38E-287	1.79247	0.842	0.482	1.65E-282	Vein	GJA4
FNBP1L	1.62E-286	0.417141	0.275	0.015	4.98E-282	Vein	FNBP1L
TBX2-AS1	2.18E-284	1.00676	0.63	0.177	6.70E-280	Vein	TBX2-AS1
FABP5	1.53E-283	0.577593	0.339	0.031	4.72E-279	Vein	FABP5
IFITM2	4.39E-283	1.60425	0.887	0.517	1.35E-278	Vein	IFITM2
NEURL1B	5.22E-279	0.708152	0.447	0.071	1.60E-274	Vein	NEURL1B
LAMA3	5.16E-278	0.393758	0.245	0.01	1.59E-273	Vein	LAMA3
CACNA1A	5.26E-277	0.73551	0.413	0.057	1.62E-272	Vein	CACNA1A
MTRNR2L12	3.44E-276	-1.48751	0.971	0.995	1.06E-271	Artery	MTRNR2L12
GABRD	3.24E-275	0.412435	0.19	0.002	9.97E-271	Vein	GABRD
FAM162B	5.34E-271	0.477716	0.363	0.042	1.64E-266	Vein	FAM162B
BCAM	6.87E-271	1.35688	0.945	0.725	2.11E-266	Vein	BCAM
FBXL13	7.39E-267	0.483432	0.285	0.021	2.27E-262	Vein	FBXL13
PLAC9	1.29E-265	1.41789	0.839	0.413	3.96E-261	Vein	PLAC9
MT-ND4L	8.51E-263	-1.25075	0.878	0.976	2.62E-258	Artery	MT-ND4L
EPHA3	4.36E-260	0.391598	0.258	0.015	1.34E-255	Vein	EPHA3
CD248	8.30E-259	0.526645	0.332	0.035	2.55E-254	Vein	CD248
RPL28	9.11E-256	1.21572	0.992	0.931	2.80E-251	Vein	RPL28
CAMK2N1	5.40E-253	0.567303	0.388	0.054	1.66E-248	Vein	CAMK2N1
NDRG2	2.53E-252	1.37019	0.79	0.406	7.77E-248	Vein	NDRG2
NT5DC2	6.34E-252	1.0115	0.677	0.242	1.95E-247	Vein	NT5DC2
GMDS	7.80E-252	-1.26639	0.159	0.747	2.40E-247	Artery	GMDS
LIMCH1	9.48E-251	-1.11991	0.135	0.749	2.91E-246	Artery	LIMCH1
ID4	1.73E-248	-1.63808	0.409	0.893	5.31E-244	Artery	ID4
LINGO1	9.18E-248	0.772479	0.546	0.137	2.82E-243	Vein	LINGO1
PTP4A3	9.80E-245	1.47672	0.803	0.445	3.01E-240	Vein	PTP4A3
HOXC9	1.93E-243	0.275585	0.178	0.003	5.94E-239	Vein	HOXC9
APOLD1	4.03E-243	1.40403	0.706	0.262	1.24E-238	Vein	APOLD1
CLU	1.18E-242	-1.3996	0.739	0.964	3.61E-238	Artery	CLU
ISYNA1	9.18E-242	1.02392	0.637	0.208	2.82E-237	Vein	ISYNA1
TPPP3	1.00E-240	0.398154	0.253	0.017	3.08E-236	Vein	TPPP3
LBH	2.03E-239	1.51331	0.897	0.667	6.23E-235	Vein	LBH
FBLIM1	3.44E-236	-1.14999	0.474	0.893	1.06E-231	Artery	FBLIM1
GPRC5B	1.25E-234	0.271852	0.182	0.004	3.85E-230	Vein	GPRC5B
AC079822.1	8.02E-234	0.281652	0.178	0.004	2.46E-229	Vein	AC079822.1
PDGFB	2.70E-233	0.280178	0.174	0.003	8.29E-229	Vein	PDGFB
SH3KBP1	1.88E-229	0.527321	0.387	0.063	5.79E-225	Vein	SH3KBP1
ITGA5	2.21E-226	-1.78068	0.231	0.773	6.78E-222	Artery	ITGA5
GPRIN3	6.39E-225	0.453276	0.224	0.013	1.96E-220	Vein	GPRIN3
TIMP3	4.03E-224	1.42973	0.972	0.919	1.24E-219	Vein	TIMP3
MAL	4.05E-222	0.21002	0.15	0.001	1.25E-217	Vein	MAL
ANGPT4	4.61E-221	0.520984	0.293	0.033	1.42E-216	Vein	ANGPT4
ADRA2B	2.88E-220	0.265117	0.154	0.002	8.85E-216	Vein	ADRA2B
ADGRA2	1.26E-217	0.550782	0.395	0.07	3.88E-213	Vein	ADGRA2
RPL29	1.07E-216	1.00902	0.978	0.928	3.28E-212	Vein	RPL29
ALDH1B1	1.41E-216	-1.05205	0.1	0.674	4.34E-212	Artery	ALDH1B1
PRELP	1.30E-213	-1.14378	0.513	0.895	3.99E-209	Artery	PRELP
LGI4	2.64E-213	0.91386	0.653	0.249	8.10E-209	Vein	LGI4
TINAGL1	2.84E-212	1.0179	0.94	0.847	8.74E-208	Vein	TINAGL1
USP2	1.61E-211	0.734809	0.437	0.094	4.95E-207	Vein	USP2
HES4	2.03E-211	1.28773	0.916	0.755	6.24E-207	Vein	HES4
NCKAP5	1.38E-208	0.23453	0.142	0.001	4.23E-204	Vein	NCKAP5
PTGER3	3.12E-208	-0.873201	0.006	0.584	9.57E-204	Artery	PTGER3
TESC	4.09E-208	0.23834	0.148	0.002	1.26E-203	Vein	TESC
CXCL12	8.25E-208	1.0205	0.535	0.155	2.53E-203	Vein	CXCL12
PRSS23	1.04E-203	-1.14222	0.15	0.697	3.20E-199	Artery	PRSS23
TXNIP	4.28E-203	1.6642	0.744	0.401	1.31E-198	Vein	TXNIP
SCRG1	6.63E-202	-1.12569	0.022	0.586	2.04E-197	Artery	SCRG1
SULT1A1	3.44E-200	0.187921	0.148	0.003	1.06E-195	Vein	SULT1A1
PTN	5.26E-199	0.409703	0.196	0.011	1.62E-194	Vein	PTN
EDIL3	9.02E-199	-0.997743	0.294	0.818	2.77E-194	Artery	EDIL3
MEIS3	1.73E-197	0.191649	0.16	0.005	5.33E-193	Vein	MEIS3
LPP	2.15E-197	-0.978515	0.962	0.994	6.60E-193	Artery	LPP
SEPTIN7	3.41E-194	0.826227	0.957	0.924	1.05E-189	Vein	SEPTIN7
LRP1	4.08E-194	-1.04459	0.298	0.788	1.26E-189	Artery	LRP1
HRH2	3.59E-192	0.852087	0.468	0.123	1.10E-187	Vein	HRH2
MT-ND2	6.71E-192	-1.03526	0.991	0.996	2.06E-187	Artery	MT-ND2
RAMP1	2.02E-191	-1.17135	0.556	0.886	6.21E-187	Artery	RAMP1
CBFA2T3	2.23E-190	0.192857	0.132	0.001	6.86E-186	Vein	CBFA2T3
RIPOR2	2.91E-189	0.284755	0.21	0.016	8.94E-185	Vein	RIPOR2
HMGCLL1	1.22E-188	0.167648	0.132	0.002	3.75E-184	Vein	HMGCLL1
MTRNR2L8	6.70E-188	-0.485737	0.675	0.955	2.06E-183	Artery	MTRNR2L8
PDGFRB	7.35E-187	1.27644	0.936	0.762	2.26E-182	Vein	PDGFRB
TMC6	8.16E-187	0.254451	0.199	0.014	2.51E-182	Vein	TMC6
CHCHD10	8.24E-187	1.03771	0.762	0.453	2.53E-182	Vein	CHCHD10
EDNRA	4.26E-186	0.982314	0.703	0.352	1.31E-181	Vein	EDNRA
GAS6	3.79E-185	-1.02005	0.375	0.807	1.16E-180	Artery	GAS6
LMCD1	5.69E-185	-1.27966	0.207	0.722	1.75E-180	Artery	LMCD1
TRPC6	5.91E-185	0.195641	0.158	0.006	1.82E-180	Vein	TRPC6
H3F3B	5.83E-184	0.803763	0.987	0.982	1.79E-179	Vein	H3F3B
H1F0	2.27E-183	1.15123	0.65	0.276	6.97E-179	Vein	H1F0
SCN4B	1.30E-182	0.163324	0.122	0.001	4.00E-178	Vein	SCN4B
RPS26	1.68E-182	1.30714	0.96	0.885	5.17E-178	Vein	RPS26
PPP1R14A	3.35E-182	-1.01581	0.943	0.983	1.03E-177	Artery	PPP1R14A
HTR1F	1.03E-180	0.187825	0.122	0.001	3.16E-176	Vein	HTR1F
FTL	3.11E-180	-1.14043	0.999	0.998	9.57E-176	Artery	FTL
POPDC2	3.12E-180	0.244477	0.168	0.008	9.59E-176	Vein	POPDC2
SHC2	1.43E-178	0.184799	0.126	0.002	4.41E-174	Vein	SHC2
LTBP1	1.88E-177	-0.971653	0.605	0.908	5.78E-173	Artery	LTBP1
RGCC	8.04E-177	0.693086	0.349	0.068	2.47E-172	Vein	RGCC
SEPTIN4	1.44E-176	0.87849	0.587	0.235	4.43E-172	Vein	SEPTIN4
PCP4L1	9.17E-176	0.215061	0.16	0.007	2.82E-171	Vein	PCP4L1
PRDM6	2.28E-175	-0.77494	0.006	0.522	7.00E-171	Artery	PRDM6
RPS2	2.65E-175	1.10262	0.991	0.968	8.13E-171	Vein	RPS2
MT1E	4.34E-175	1.49508	0.91	0.663	1.33E-170	Vein	MT1E
C12orf75	6.30E-173	-1.10031	0.531	0.901	1.94E-168	Artery	C12orf75
FHL5	2.63E-172	-0.963827	0.664	0.913	8.07E-168	Artery	FHL5
DES	2.81E-172	-1.93428	0.505	0.853	8.64E-168	Artery	DES
IGFBP2	5.76E-172	-1.09135	0.236	0.749	1.77E-167	Artery	IGFBP2
FXYD6	1.61E-169	0.241953	0.142	0.005	4.95E-165	Vein	FXYD6
GALNT16	2.30E-169	0.331459	0.264	0.036	7.08E-165	Vein	GALNT16
FRMD3	3.22E-169	0.449298	0.253	0.033	9.88E-165	Vein	FRMD3
RPS9	4.13E-169	0.887049	0.984	0.958	1.27E-164	Vein	RPS9
PXDC1	1.17E-168	-0.931337	0.323	0.755	3.61E-164	Artery	PXDC1
EGFLAM	5.37E-168	0.568523	0.454	0.131	1.65E-163	Vein	EGFLAM
HSPB8	4.08E-167	-0.954471	0.275	0.721	1.26E-162	Artery	HSPB8
ADH1B	9.22E-167	-2.06283	0.09	0.583	2.83E-162	Artery	ADH1B
PRXL2A	3.20E-166	0.423676	0.306	0.053	9.83E-162	Vein	PRXL2A
CAV1	5.46E-166	0.839687	0.974	0.92	1.68E-161	Vein	CAV1
DGKB	1.47E-165	0.186557	0.124	0.002	4.51E-161	Vein	DGKB
GPX3	4.56E-165	1.365	0.852	0.603	1.40E-160	Vein	GPX3
PHACTR1	9.22E-165	-0.818245	0.121	0.631	2.83E-160	Artery	PHACTR1
MEF2B	1.09E-164	0.474762	0.265	0.038	3.35E-160	Vein	MEF2B
CNN1	2.38E-164	-1.01972	0.87	0.969	7.30E-160	Artery	CNN1
RGS6	4.69E-164	0.507096	0.361	0.078	1.44E-159	Vein	RGS6
OAZ2	4.03E-163	0.963506	0.737	0.456	1.24E-158	Vein	OAZ2
SYNGR1	1.04E-162	0.175105	0.145	0.006	3.20E-158	Vein	SYNGR1
GUCY1A2	2.67E-162	0.305066	0.123	0.003	8.20E-158	Vein	GUCY1A2
NRGN	3.38E-160	0.901214	0.701	0.34	1.04E-155	Vein	NRGN
CD81	1.18E-159	0.853659	0.96	0.925	3.64E-155	Vein	CD81
ADRA1D	1.81E-159	0.211551	0.157	0.009	5.57E-155	Vein	ADRA1D
ITGBL1	1.94E-159	-0.771356	0.038	0.534	5.97E-155	Artery	ITGBL1
CLEC11A	2.27E-159	0.25497	0.189	0.016	6.98E-155	Vein	CLEC11A
LRRC10B	4.55E-159	0.880239	0.593	0.25	1.40E-154	Vein	LRRC10B
F10	4.87E-159	0.606869	0.454	0.135	1.50E-154	Vein	F10
DUSP1	2.32E-158	-1.14102	0.837	0.961	7.14E-154	Artery	DUSP1
STOX1	2.48E-158	0.216556	0.147	0.007	7.63E-154	Vein	STOX1
KAZN	6.85E-158	0.548608	0.383	0.093	2.10E-153	Vein	KAZN
HLA-B	8.64E-157	1.04788	0.781	0.496	2.66E-152	Vein	HLA-B
NOTCH3	3.44E-156	0.871719	0.946	0.893	1.06E-151	Vein	NOTCH3
XIST	4.99E-156	0.76494	0.775	0.332	1.54E-151	Vein	XIST
SPINK2	6.09E-156	0.167396	0.099	0	1.87E-151	Vein	SPINK2
NRIP2	7.46E-155	0.643356	0.443	0.131	2.29E-150	Vein	NRIP2
NTRK2	1.13E-154	1.02812	0.877	0.715	3.48E-150	Vein	NTRK2
CYFIP2	2.95E-153	-0.851393	0.119	0.604	9.07E-149	Artery	CYFIP2
RPL12	4.25E-153	0.839478	0.984	0.94	1.31E-148	Vein	RPL12
UTRN	3.23E-152	0.974163	0.881	0.716	9.92E-148	Vein	UTRN
KLHL23	3.61E-152	0.972321	0.633	0.306	1.11E-147	Vein	KLHL23
RPLP0	4.37E-152	1.01896	0.962	0.916	1.34E-147	Vein	RPLP0
BASP1	1.38E-151	-0.783149	0.029	0.503	4.23E-147	Artery	BASP1
MT2A	3.95E-151	1.03963	0.991	0.942	1.21E-146	Vein	MT2A
PLXDC2	1.22E-150	-0.757087	0.05	0.524	3.74E-146	Artery	PLXDC2
ANGPTL4	2.59E-150	0.82129	0.371	0.092	7.95E-146	Vein	ANGPTL4
EPS8	1.88E-149	0.859297	0.889	0.808	5.77E-145	Vein	EPS8
GPRC5C	2.14E-149	1.07492	0.754	0.512	6.59E-145	Vein	GPRC5C
CPE	1.86E-148	-0.735123	0.86	0.95	5.71E-144	Artery	CPE
OGN	3.79E-148	-1.24497	0.166	0.616	1.17E-143	Artery	OGN
AC007614.1	7.40E-148	0.213529	0.1	0.001	2.28E-143	Vein	AC007614.1
NFASC	2.60E-147	0.624512	0.496	0.166	7.98E-143	Vein	NFASC
GPR20	5.09E-147	0.669562	0.487	0.166	1.56E-142	Vein	GPR20
ADH5	2.83E-146	-0.852123	0.625	0.852	8.69E-142	Artery	ADH5
VEGFA	9.38E-146	0.808367	0.474	0.159	2.88E-141	Vein	VEGFA
RGS16	2.62E-145	1.99741	0.702	0.381	8.05E-141	Vein	RGS16
ACADL	5.58E-145	-0.72868	0.032	0.496	1.71E-140	Artery	ACADL
ADRA2C	5.75E-145	-0.84379	0.147	0.613	1.77E-140	Artery	ADRA2C
SHROOM3	2.79E-144	-0.721773	0.04	0.494	8.57E-140	Artery	SHROOM3
NNMT	3.82E-144	-1.14777	0.583	0.883	1.17E-139	Artery	NNMT
RCSD1	3.25E-143	0.494602	0.385	0.103	9.98E-139	Vein	RCSD1
HIGD1B	3.49E-143	0.179429	0.096	0.001	1.07E-138	Vein	HIGD1B
GLIPR1	2.60E-142	-0.775294	0.289	0.719	7.99E-138	Artery	GLIPR1
AC007406.3	2.79E-142	0.122039	0.091	0	8.56E-138	Vein	AC007406.3
CNTN4	5.78E-142	-0.719824	0.048	0.508	1.78E-137	Artery	CNTN4
FBLN5	9.08E-142	-0.749523	0.05	0.509	2.79E-137	Artery	FBLN5
MPP7	1.02E-141	-0.694589	0.111	0.574	3.12E-137	Artery	MPP7
EFEMP1	1.14E-139	-0.677967	0.103	0.571	3.51E-135	Artery	EFEMP1
MRPL33	2.82E-139	-0.849702	0.62	0.843	8.66E-135	Artery	MRPL33
SMARCD3	2.95E-139	0.923103	0.769	0.505	9.07E-135	Vein	SMARCD3
ASPN	5.23E-139	-0.935171	0.088	0.536	1.61E-134	Artery	ASPN
MGLL	3.29E-138	0.979778	0.738	0.525	1.01E-133	Vein	MGLL
CLIC4	3.49E-138	-0.829881	0.787	0.932	1.07E-133	Artery	CLIC4
PIP5K1B	1.30E-137	0.567235	0.43	0.134	3.98E-133	Vein	PIP5K1B
HVCN1	1.48E-136	0.361324	0.282	0.055	4.55E-132	Vein	HVCN1
TIMP2	2.98E-136	-0.782598	0.715	0.92	9.15E-132	Artery	TIMP2
GPAT2	6.52E-136	0.418726	0.198	0.024	2.00E-131	Vein	GPAT2
CDH13	6.67E-136	-0.721556	0.195	0.647	2.05E-131	Artery	CDH13
NEXN	3.15E-134	-0.832568	0.85	0.954	9.68E-130	Artery	NEXN
FSTL1	3.32E-134	-0.774394	0.29	0.717	1.02E-129	Artery	FSTL1
RACK1	3.42E-134	0.742822	0.967	0.923	1.05E-129	Vein	RACK1
FAM207A	3.64E-134	-0.852138	0.315	0.706	1.12E-129	Artery	FAM207A
FHL1	3.74E-133	-0.8379	0.842	0.966	1.15E-128	Artery	FHL1
C1QTNF1	4.51E-133	0.847872	0.866	0.736	1.39E-128	Vein	C1QTNF1
ZBTB7C	7.05E-133	0.528489	0.422	0.133	2.17E-128	Vein	ZBTB7C
PCOLCE	1.83E-132	0.662727	0.435	0.145	5.61E-128	Vein	PCOLCE
STEAP4	3.02E-132	0.653975	0.134	0.008	9.30E-128	Vein	STEAP4
FOXP1	3.68E-132	-0.794078	0.516	0.844	1.13E-127	Artery	FOXP1
ADGRL3	2.92E-131	-0.674334	0.144	0.585	8.96E-127	Artery	ADGRL3
SMAD9	1.40E-130	-0.680975	0.136	0.575	4.30E-126	Artery	SMAD9
IGFBP4	1.83E-130	1.01244	0.769	0.496	5.64E-126	Vein	IGFBP4
HSPB7	2.03E-130	-0.793826	0.358	0.759	6.23E-126	Artery	HSPB7
ARHGEF7	4.22E-130	0.831248	0.763	0.504	1.30E-125	Vein	ARHGEF7
FSTL4	5.46E-130	0.168219	0.087	0.001	1.68E-125	Vein	FSTL4
PDK3	1.04E-129	-0.751127	0.339	0.778	3.19E-125	Artery	PDK3
PTGDR	1.09E-129	0.134946	0.089	0.001	3.36E-125	Vein	PTGDR
VCAM1	1.52E-129	0.399992	0.111	0.004	4.67E-125	Vein	VCAM1
L3MBTL4	1.62E-129	0.205772	0.144	0.011	4.97E-125	Vein	L3MBTL4
H1FX	3.52E-129	1.08963	0.812	0.598	1.08E-124	Vein	H1FX
FMOD	1.80E-128	-0.695567	0.162	0.594	5.52E-124	Artery	FMOD
PAM	2.20E-128	-0.708594	0.274	0.689	6.75E-124	Artery	PAM
RPL8	2.52E-128	0.740793	0.984	0.955	7.75E-124	Vein	RPL8
MRGPRF	4.18E-128	0.960023	0.812	0.623	1.29E-123	Vein	MRGPRF
SLFN11	4.69E-128	0.35487	0.266	0.05	1.44E-123	Vein	SLFN11
ITIH5	9.73E-128	0.817649	0.805	0.598	2.99E-123	Vein	ITIH5
PDLIM3	2.73E-127	-0.889484	0.734	0.923	8.38E-123	Artery	PDLIM3
MFAP4	3.26E-127	-1.04755	0.252	0.664	1.00E-122	Artery	MFAP4
LPAR1	1.54E-126	-0.549713	0.019	0.439	4.73E-122	Artery	LPAR1
RPS8	5.18E-126	0.797272	0.984	0.964	1.59E-121	Vein	RPS8
TSPAN2	3.15E-125	-0.631237	0.185	0.612	9.68E-121	Artery	TSPAN2
MTRNR2L1	1.13E-123	-1.88415	0.038	0.444	3.48E-119	Artery	MTRNR2L1
MT1M	1.27E-123	1.14649	0.866	0.662	3.92E-119	Vein	MT1M
FZD10-AS1	3.02E-123	0.110502	0.097	0.002	9.27E-119	Vein	FZD10-AS1
PGF	4.65E-123	0.937965	0.629	0.343	1.43E-118	Vein	PGF
PPARG	5.01E-123	0.199168	0.182	0.022	1.54E-118	Vein	PPARG
MIR100HG	1.00E-122	-0.572957	0.05	0.47	3.08E-118	Artery	MIR100HG
RGL3	1.04E-122	0.3943	0.287	0.063	3.19E-118	Vein	RGL3
MT1F	7.18E-122	0.438714	0.285	0.062	2.21E-117	Vein	MT1F
RPL18	8.66E-122	0.653689	0.982	0.96	2.66E-117	Vein	RPL18
FKBP5	1.39E-121	0.809324	0.875	0.575	4.28E-117	Vein	FKBP5
TBX3	2.67E-121	0.404753	0.273	0.057	8.20E-117	Vein	TBX3
FAM107B	2.75E-121	1.00634	0.645	0.371	8.45E-117	Vein	FAM107B
FBXO32	3.04E-121	-0.833396	0.733	0.939	9.33E-117	Artery	FBXO32
SMTN	3.90E-121	-0.760241	0.762	0.927	1.20E-116	Artery	SMTN
HRC	6.77E-121	0.509556	0.38	0.116	2.08E-116	Vein	HRC
SLC22A18	7.41E-121	0.245037	0.188	0.025	2.28E-116	Vein	SLC22A18
SUSD2	1.06E-120	0.83352	0.68	0.402	3.27E-116	Vein	SUSD2
GPRC5A	1.26E-120	-0.988344	0.207	0.628	3.86E-116	Artery	GPRC5A
DAAM1	4.50E-120	-0.782386	0.267	0.674	1.38E-115	Artery	DAAM1
ASPA	6.65E-120	0.141522	0.104	0.004	2.04E-115	Vein	ASPA
PHGDH	1.32E-119	-0.612922	0.174	0.59	4.06E-115	Artery	PHGDH
SPECC1	1.47E-119	0.831878	0.657	0.38	4.51E-115	Vein	SPECC1
MUSTN1	1.27E-118	0.759883	0.967	0.948	3.91E-114	Vein	MUSTN1
RPL13	1.34E-118	0.617726	0.999	0.988	4.11E-114	Vein	RPL13
RPS15A	1.34E-118	0.680466	0.978	0.939	4.11E-114	Vein	RPS15A
SGCD	4.57E-118	-0.608317	0.037	0.443	1.41E-113	Artery	SGCD
ACTC1	7.21E-118	-1.4769	0.179	0.594	2.22E-113	Artery	ACTC1
OR51E1	1.99E-117	0.552747	0.383	0.121	6.11E-113	Vein	OR51E1
CDC42EP3	2.04E-117	-0.604937	0.075	0.48	6.28E-113	Artery	CDC42EP3
RAP1A	6.79E-117	-0.747646	0.577	0.823	2.09E-112	Artery	RAP1A
CRNDE	1.08E-116	-0.627406	0.177	0.585	3.31E-112	Artery	CRNDE
RPL6	1.60E-116	0.621866	0.983	0.956	4.91E-112	Vein	RPL6
TMEM51	1.75E-116	0.467929	0.347	0.1	5.39E-112	Vein	TMEM51
SMIM3	1.88E-116	0.608868	0.462	0.182	5.76E-112	Vein	SMIM3
MYEF2	2.88E-116	-0.618709	0.096	0.508	8.85E-112	Artery	MYEF2
RAB13	3.26E-116	0.816636	0.845	0.708	1.00E-111	Vein	RAB13
SLC7A2	6.03E-116	0.760483	0.657	0.34	1.85E-111	Vein	SLC7A2
AC140912.1	6.33E-116	0.292308	0.197	0.029	1.95E-111	Vein	AC140912.1
BACE2	8.78E-116	-0.658505	0.199	0.599	2.70E-111	Artery	BACE2
SVIL	2.29E-115	-0.760156	0.78	0.94	7.03E-111	Artery	SVIL
ADAMTS9	3.82E-115	0.998028	0.514	0.221	1.17E-110	Vein	ADAMTS9
PTTG1IP	4.19E-115	-0.684472	0.564	0.837	1.29E-110	Artery	PTTG1IP
ITGA8	9.90E-115	-0.825824	0.707	0.921	3.04E-110	Artery	ITGA8
DPYSL3	1.13E-114	-0.706484	0.382	0.76	3.48E-110	Artery	DPYSL3
GUCY1B1	1.05E-113	0.716428	0.666	0.403	3.24E-109	Vein	GUCY1B1
MTHFD2	6.58E-113	0.943964	0.778	0.587	2.02E-108	Vein	MTHFD2
P2RX1	7.58E-113	-0.735572	0.06	0.461	2.33E-108	Artery	P2RX1
AC091182.1	7.94E-113	0.520315	0.407	0.138	2.44E-108	Vein	AC091182.1
SOCS2	9.47E-113	0.339189	0.231	0.043	2.91E-108	Vein	SOCS2
TC2N	1.96E-112	-0.607118	0.011	0.391	6.01E-108	Artery	TC2N
CSRP1	4.17E-112	-0.743838	0.946	0.982	1.28E-107	Artery	CSRP1
RPL3	8.49E-112	0.610609	0.994	0.977	2.61E-107	Vein	RPL3
ACTN1	1.01E-111	-0.626439	0.923	0.976	3.12E-107	Artery	ACTN1
CCL8	1.24E-111	0.446717	0.093	0.003	3.82E-107	Vein	CCL8
CCDC6	1.93E-111	-0.704901	0.437	0.78	5.95E-107	Artery	CCDC6
MT-ATP8	2.05E-111	-0.739493	0.621	0.898	6.30E-107	Artery	MT-ATP8
PNRC1	2.23E-111	0.65998	0.951	0.938	6.85E-107	Vein	PNRC1
HIC1	2.37E-111	0.237165	0.128	0.01	7.28E-107	Vein	HIC1
FXYD5	2.67E-111	0.314247	0.189	0.028	8.20E-107	Vein	FXYD5
S100A6	1.22E-110	-0.770206	0.993	0.998	3.74E-106	Artery	S100A6
RPS4X	3.06E-110	0.627439	0.988	0.97	9.41E-106	Vein	RPS4X
MBNL1	4.93E-110	-0.720767	0.846	0.956	1.51E-105	Artery	MBNL1
PRLR	1.11E-109	0.117267	0.08	0.001	3.40E-105	Vein	PRLR
CCND2	1.67E-108	-0.660525	0.264	0.66	5.14E-104	Artery	CCND2
OSR1	8.86E-108	-0.762545	0.002	0.367	2.72E-103	Artery	OSR1
JAK1	9.04E-108	0.694119	0.815	0.696	2.78E-103	Vein	JAK1
MEDAG	2.52E-107	-0.99883	0.101	0.488	7.76E-103	Artery	MEDAG
CD34	2.72E-107	0.185275	0.135	0.012	8.37E-103	Vein	CD34
ITGA1	4.04E-107	-0.812234	0.543	0.845	1.24E-102	Artery	ITGA1
KIAA0040	5.20E-107	0.632306	0.494	0.22	1.60E-102	Vein	KIAA0040
SBDS	1.87E-106	-0.577109	0.834	0.925	5.75E-102	Artery	SBDS
RND3	2.55E-106	-1.02321	0.424	0.776	7.84E-102	Artery	RND3
SERPINI1	5.99E-106	0.65612	0.506	0.237	1.84E-101	Vein	SERPINI1
KCNMA1	8.17E-106	-0.646817	0.456	0.826	2.51E-101	Artery	KCNMA1
FOXC1	8.93E-106	-0.654319	0.601	0.884	2.74E-101	Artery	FOXC1
BTG1	1.76E-105	0.957293	0.884	0.818	5.42E-101	Vein	BTG1
ELL2	1.99E-105	-1.06575	0.465	0.802	6.12E-101	Artery	ELL2
COL14A1	2.50E-105	-0.863116	0.803	0.942	7.68E-101	Artery	COL14A1
RPL19	1.53E-104	0.589019	0.993	0.97	4.70E-100	Vein	RPL19
CYBRD1	1.81E-104	-0.661402	0.349	0.717	5.55E-100	Artery	CYBRD1
PPIC	4.33E-104	-0.596904	0.225	0.594	1.33E-99	Artery	PPIC
HAPLN2	4.98E-104	0.219996	0.135	0.013	1.53E-99	Vein	HAPLN2
TBC1D1	9.13E-104	0.737763	0.829	0.687	2.81E-99	Vein	TBC1D1
KANK1	1.24E-103	-0.647386	0.224	0.612	3.80E-99	Artery	KANK1
TNFRSF11B	1.41E-103	-1.00779	0.006	0.362	4.32E-99	Artery	TNFRSF11B
EHD2	1.72E-103	0.687434	0.824	0.75	5.28E-99	Vein	EHD2
GJC1	1.96E-103	0.485044	0.379	0.125	6.01E-99	Vein	GJC1
DUSP26	3.22E-103	-0.44234	0.023	0.384	9.88E-99	Artery	DUSP26
FIBIN	3.93E-103	-0.599202	0.067	0.444	1.21E-98	Artery	FIBIN
CD4	4.50E-103	0.145686	0.094	0.004	1.38E-98	Vein	CD4
CMPK1	1.03E-102	-0.587614	0.421	0.75	3.15E-98	Artery	CMPK1
PHLDA1	1.16E-102	0.677262	0.348	0.11	3.57E-98	Vein	PHLDA1
SOST	1.51E-102	-0.917577	0.001	0.353	4.64E-98	Artery	SOST
ACTG1	1.69E-102	0.586996	0.993	0.985	5.20E-98	Vein	ACTG1
HOPX	1.98E-102	0.153075	0.082	0.002	6.08E-98	Vein	HOPX
CCN2	4.81E-102	-1.43177	0.395	0.711	1.48E-97	Artery	CCN2
KIF5B	6.86E-102	-0.651521	0.757	0.887	2.11E-97	Artery	KIF5B
ERRFI1	9.30E-102	-0.866959	0.294	0.657	2.86E-97	Artery	ERRFI1
ELK3	1.42E-101	0.31325	0.209	0.038	4.36E-97	Vein	ELK3
ICAM2	2.06E-101	0.133082	0.084	0.003	6.33E-97	Vein	ICAM2
AQP1	6.67E-101	-0.747255	0.269	0.63	2.05E-96	Artery	AQP1
PLN	7.05E-101	-0.772782	0.916	0.96	2.17E-96	Artery	PLN
EXT1	1.49E-100	-0.623887	0.15	0.53	4.59E-96	Artery	EXT1
RPS5	2.18E-100	0.752539	0.95	0.909	6.70E-96	Vein	RPS5
CELF2	5.64E-100	-0.543465	0.114	0.489	1.73E-95	Artery	CELF2
SLC25A6	1.54E-99	0.693169	0.903	0.846	4.72E-95	Vein	SLC25A6
PYCARD	1.56E-99	0.164821	0.145	0.017	4.81E-95	Vein	PYCARD
TJP1	2.88E-99	-0.679567	0.484	0.793	8.84E-95	Artery	TJP1
SLCO3A1	4.89E-99	0.587324	0.447	0.185	1.50E-94	Vein	SLCO3A1
COL27A1	9.45E-98	0.502236	0.335	0.106	2.90E-93	Vein	COL27A1
VGLL3	1.46E-97	-0.647022	0.176	0.551	4.49E-93	Artery	VGLL3
FLNB	6.53E-97	-0.740488	0.075	0.439	2.01E-92	Artery	FLNB
AJAP1	9.11E-97	0.117646	0.068	0.001	2.80E-92	Vein	AJAP1
TUBA1C	1.31E-96	0.750259	0.603	0.365	4.02E-92	Vein	TUBA1C
GUCY1A1	3.21E-96	0.708146	0.778	0.589	9.87E-92	Vein	GUCY1A1
PCDH1	4.76E-96	0.316953	0.29	0.08	1.46E-91	Vein	PCDH1
CSNK1E	1.13E-95	0.664755	0.696	0.477	3.47E-91	Vein	CSNK1E
JUP	1.42E-95	0.313496	0.229	0.049	4.36E-91	Vein	JUP
FRMD4A	1.49E-95	0.669875	0.597	0.336	4.59E-91	Vein	FRMD4A
SNRK	3.40E-95	0.514678	0.429	0.175	1.05E-90	Vein	SNRK
RPL18A	3.62E-95	0.682143	0.981	0.961	1.11E-90	Vein	RPL18A
MXRA7	5.42E-95	-0.578434	0.696	0.859	1.66E-90	Artery	MXRA7
RASD1	8.14E-95	0.911043	0.349	0.119	2.50E-90	Vein	RASD1
RTN2	2.32E-94	0.343115	0.327	0.103	7.14E-90	Vein	RTN2
ANKH	2.56E-94	-0.480155	0.114	0.483	7.86E-90	Artery	ANKH
SGIP1	2.91E-94	-0.575628	0.118	0.484	8.94E-90	Artery	SGIP1
TMEM47	2.95E-94	-0.714635	0.499	0.779	9.06E-90	Artery	TMEM47
UNC13C	3.02E-94	-0.519867	0.014	0.349	9.27E-90	Artery	UNC13C
KLF4	3.21E-94	-0.874448	0.361	0.697	9.88E-90	Artery	KLF4
ARTN	5.91E-94	0.237741	0.167	0.026	1.82E-89	Vein	ARTN
RPS19	7.60E-94	0.640078	0.989	0.969	2.34E-89	Vein	RPS19
JAK2	7.66E-94	-0.594779	0.233	0.611	2.35E-89	Artery	JAK2
RASSF1	7.77E-94	0.615492	0.525	0.263	2.39E-89	Vein	RASSF1
SCUBE3	8.80E-94	-0.556121	0.113	0.48	2.70E-89	Artery	SCUBE3
CACNA1G	9.68E-94	0.100915	0.064	0.001	2.98E-89	Vein	CACNA1G
PART1	1.14E-93	-0.445389	0.009	0.341	3.50E-89	Artery	PART1
NGFR	1.16E-93	0.205437	0.117	0.011	3.56E-89	Vein	NGFR
MRAP2	1.16E-93	-0.447907	0.044	0.389	3.56E-89	Artery	MRAP2
YWHAH	1.28E-93	-0.648037	0.7	0.877	3.95E-89	Artery	YWHAH
FOXN3	1.31E-93	-0.64832	0.517	0.795	4.03E-89	Artery	FOXN3
IFI27	1.54E-93	0.178747	0.107	0.008	4.73E-89	Vein	IFI27
B3GNT2	2.15E-93	0.47241	0.384	0.142	6.60E-89	Vein	B3GNT2
AC113167.1	2.37E-93	0.264182	0.183	0.032	7.30E-89	Vein	AC113167.1
HSPB1	2.97E-93	-0.531128	0.972	0.996	9.12E-89	Artery	HSPB1
TBXA2R	3.02E-93	-0.394138	0.03	0.369	9.28E-89	Artery	TBXA2R
RPL32	4.07E-93	0.563441	0.986	0.972	1.25E-88	Vein	RPL32
HYAL1	5.66E-93	0.10507	0.081	0.003	1.74E-88	Vein	HYAL1
ITGB1	6.27E-93	-0.490419	0.953	0.981	1.93E-88	Artery	ITGB1
THSD4	7.40E-93	-0.514762	0.026	0.363	2.27E-88	Artery	THSD4
SPARC	1.25E-92	0.655263	0.939	0.864	3.84E-88	Vein	SPARC
LY6E	2.58E-92	0.279024	0.188	0.034	7.93E-88	Vein	LY6E
STK38L	2.70E-92	-0.711589	0.43	0.75	8.29E-88	Artery	STK38L
SEC62	3.27E-92	-0.60346	0.757	0.882	1.01E-87	Artery	SEC62
AC005884.1	3.77E-92	0.103813	0.082	0.003	1.16E-87	Vein	AC005884.1
GULP1	4.21E-92	-0.52544	0.166	0.529	1.29E-87	Artery	GULP1
FZD1	4.99E-92	-0.496019	0.102	0.456	1.53E-87	Artery	FZD1
ATP5MC2	6.93E-92	0.592059	0.893	0.819	2.13E-87	Vein	ATP5MC2
NEGR1	7.74E-92	-0.415911	0.016	0.349	2.38E-87	Artery	NEGR1
TYMP	8.10E-92	0.296965	0.197	0.037	2.49E-87	Vein	TYMP
MOB2	8.58E-92	0.734529	0.829	0.72	2.64E-87	Vein	MOB2
MBNL1-AS1	2.62E-91	-0.755248	0.345	0.668	8.05E-87	Artery	MBNL1-AS1
HMOX2	2.68E-91	0.533364	0.448	0.205	8.23E-87	Vein	HMOX2
ST6GAL2	5.21E-91	-0.49854	0.003	0.324	1.60E-86	Artery	ST6GAL2
PFN2	6.46E-91	-0.500862	0.215	0.577	1.99E-86	Artery	PFN2
SLC2A4	4.58E-90	0.274944	0.234	0.055	1.41E-85	Vein	SLC2A4
SUN2	1.06E-89	-0.608519	0.601	0.864	3.25E-85	Artery	SUN2
PIK3R1	3.22E-89	-0.653238	0.307	0.654	9.89E-85	Artery	PIK3R1
HOXC8	4.13E-89	0.110226	0.08	0.003	1.27E-84	Vein	HOXC8
CPED1	1.69E-88	-0.649267	0.451	0.751	5.20E-84	Artery	CPED1
ACVRL1	4.72E-88	0.117235	0.088	0.005	1.45E-83	Vein	ACVRL1
SASH1	8.93E-88	-0.5641	0.118	0.474	2.74E-83	Artery	SASH1
DDX3Y	1.20E-87	-0.678569	0.073	0.41	3.68E-83	Artery	DDX3Y
RGS11	1.67E-87	0.145793	0.089	0.005	5.13E-83	Vein	RGS11
SLC2A3	2.28E-87	0.712228	0.61	0.325	7.01E-83	Vein	SLC2A3
MYRFL	3.56E-87	-0.523749	0	0.31	1.09E-82	Artery	MYRFL
RPS15	6.17E-87	0.537976	0.982	0.957	1.90E-82	Vein	RPS15
PLTP	7.04E-87	0.27748	0.204	0.043	2.16E-82	Vein	PLTP
CPXM2	1.70E-86	-0.416855	0.019	0.34	5.22E-82	Artery	CPXM2
SDC4	2.72E-86	-0.52881	0.16	0.517	8.36E-82	Artery	SDC4
ADAMTSL3	2.80E-86	-0.41717	0.011	0.324	8.61E-82	Artery	ADAMTSL3
RORB	3.07E-86	-0.605938	0.05	0.377	9.42E-82	Artery	RORB
GLS	3.68E-86	-0.684399	0.562	0.841	1.13E-81	Artery	GLS
SYNE3	9.38E-86	0.390114	0.299	0.091	2.88E-81	Vein	SYNE3
PLPP3	1.09E-85	0.815782	0.725	0.546	3.34E-81	Vein	PLPP3
FOS	1.13E-85	-0.858741	0.953	0.994	3.46E-81	Artery	FOS
EPS8L1	1.42E-85	0.105099	0.077	0.003	4.35E-81	Vein	EPS8L1
TMC4	1.44E-85	0.132713	0.09	0.006	4.44E-81	Vein	TMC4
ATL3	4.45E-85	-0.605025	0.598	0.849	1.37E-80	Artery	ATL3
RPS7	5.22E-85	0.522383	0.98	0.955	1.60E-80	Vein	RPS7
IL6	5.37E-85	0.618124	0.245	0.062	1.65E-80	Vein	IL6
TTLL7	5.43E-85	-0.607832	0.609	0.857	1.67E-80	Artery	TTLL7
SYNE2	8.66E-85	0.807424	0.89	0.785	2.66E-80	Vein	SYNE2
NGF	1.09E-84	0.301191	0.225	0.054	3.35E-80	Vein	NGF
RPL7A	1.72E-84	0.514083	0.982	0.972	5.30E-80	Vein	RPL7A
SNCG	1.93E-84	0.872392	0.866	0.707	5.94E-80	Vein	SNCG
SESTD1	7.36E-84	-0.559759	0.365	0.694	2.26E-79	Artery	SESTD1
HEYL	1.28E-83	0.662572	0.531	0.287	3.93E-79	Vein	HEYL
DENND3	1.58E-83	0.700233	0.515	0.26	4.84E-79	Vein	DENND3
ACTG2	2.14E-83	-0.768362	0.782	0.95	6.58E-79	Artery	ACTG2
TEX41	4.17E-83	0.291615	0.216	0.05	1.28E-78	Vein	TEX41
ANK2	4.25E-83	0.346955	0.312	0.101	1.31E-78	Vein	ANK2
PLS3	4.48E-83	-0.555622	0.833	0.937	1.38E-78	Artery	PLS3
SRL	4.60E-83	0.371277	0.309	0.101	1.41E-78	Vein	SRL
NUDT4	1.26E-82	0.63171	0.79	0.608	3.86E-78	Vein	NUDT4
AQP7	2.68E-82	0.122856	0.082	0.005	8.23E-78	Vein	AQP7
DMD	3.21E-82	-0.676489	0.563	0.853	9.85E-78	Artery	DMD
HR	3.21E-82	0.136902	0.119	0.014	9.87E-78	Vein	HR
ZBTB46	3.48E-82	0.114376	0.074	0.003	1.07E-77	Vein	ZBTB46
SF1	5.37E-82	0.640881	0.795	0.636	1.65E-77	Vein	SF1
SIPA1L2	7.49E-82	0.276489	0.193	0.041	2.30E-77	Vein	SIPA1L2
TNFAIP2	8.61E-82	0.171879	0.14	0.02	2.65E-77	Vein	TNFAIP2
DSTN	1.15E-81	-0.539707	0.989	0.999	3.55E-77	Artery	DSTN
CD82	1.55E-81	-0.567877	0.371	0.684	4.76E-77	Artery	CD82
MATN3	2.38E-81	0.17034	0.13	0.018	7.33E-77	Vein	MATN3
LDOC1	3.61E-81	-0.547394	0.369	0.694	1.11E-76	Artery	LDOC1
ARHGAP29	3.63E-81	0.632754	0.775	0.601	1.12E-76	Vein	ARHGAP29
LTBP4	5.33E-81	-0.473648	0.072	0.397	1.64E-76	Artery	LTBP4
RPS4Y1	9.10E-81	-0.661567	0.123	0.482	2.80E-76	Artery	RPS4Y1
COX4I1	1.02E-80	0.565097	0.889	0.835	3.15E-76	Vein	COX4I1
ARPC2	1.18E-80	0.590103	0.876	0.792	3.63E-76	Vein	ARPC2
RTN1	3.98E-80	-0.444928	0.009	0.303	1.22E-75	Artery	RTN1
STAC2	3.98E-80	-0.541231	0.032	0.339	1.22E-75	Artery	STAC2
ARL6IP5	6.02E-80	-0.553973	0.645	0.829	1.85E-75	Artery	ARL6IP5
PLOD2	6.46E-80	-0.557409	0.158	0.491	1.98E-75	Artery	PLOD2
RPS12	9.21E-80	0.634286	0.991	0.97	2.83E-75	Vein	RPS12
FLNA	9.39E-80	-0.558488	0.978	0.997	2.88E-75	Artery	FLNA
AC004540.1	1.16E-79	0.12734	0.084	0.006	3.56E-75	Vein	AC004540.1
USO1	2.51E-79	-0.493602	0.312	0.64	7.72E-75	Artery	USO1
RBM3	2.90E-79	0.633759	0.84	0.743	8.93E-75	Vein	RBM3
NME2	3.08E-79	0.609528	0.911	0.848	9.46E-75	Vein	NME2
CACNA1H	3.21E-79	0.627254	0.526	0.28	9.86E-75	Vein	CACNA1H
NRN1	7.37E-79	-0.552769	0.211	0.553	2.27E-74	Artery	NRN1
VCL	8.96E-79	-0.592552	0.814	0.947	2.75E-74	Artery	VCL
RNF152	1.28E-78	0.690615	0.682	0.453	3.94E-74	Vein	RNF152
FAT3	1.45E-78	-0.473191	0.012	0.303	4.45E-74	Artery	FAT3
MEOX2	1.66E-78	0.443865	0.36	0.139	5.09E-74	Vein	MEOX2
UGP2	1.71E-78	-0.557946	0.588	0.812	5.24E-74	Artery	UGP2
ATOH8	1.98E-78	-0.427386	0.132	0.472	6.09E-74	Artery	ATOH8
ATP5F1E	2.00E-78	-0.565461	0.917	0.918	6.15E-74	Artery	ATP5F1E
CFL2	4.91E-78	-0.53046	0.585	0.822	1.51E-73	Artery	CFL2
GAPDH	5.46E-78	0.941458	0.973	0.908	1.68E-73	Vein	GAPDH
ABI3BP	7.33E-78	-0.470533	0.149	0.484	2.25E-73	Artery	ABI3BP
CD163L1	7.77E-78	0.120805	0.095	0.008	2.39E-73	Vein	CD163L1
VAMP2	1.11E-77	0.614352	0.802	0.661	3.41E-73	Vein	VAMP2
NT5E	1.39E-77	-0.339953	0.04	0.341	4.26E-73	Artery	NT5E
C5orf38	1.58E-77	0.218216	0.211	0.05	4.86E-73	Vein	C5orf38
CDC42EP4	1.60E-77	0.555768	0.507	0.268	4.92E-73	Vein	CDC42EP4
MGMT	1.70E-77	0.541751	0.578	0.365	5.21E-73	Vein	MGMT
CNGA1	1.82E-77	0.119515	0.054	0.001	5.60E-73	Vein	CNGA1
AMIGO2	2.21E-77	-0.617374	0.395	0.694	6.79E-73	Artery	AMIGO2
RCAN3	3.19E-77	0.107986	0.097	0.009	9.80E-73	Vein	RCAN3
NACA	1.17E-76	0.468941	0.986	0.947	3.61E-72	Vein	NACA
PFDN5	1.39E-76	0.517027	0.946	0.876	4.27E-72	Vein	PFDN5
CABIN1	2.07E-76	0.646017	0.65	0.461	6.36E-72	Vein	CABIN1
WWTR1	2.23E-76	-0.537534	0.391	0.698	6.85E-72	Artery	WWTR1
MTSS1	3.25E-76	0.435362	0.35	0.135	9.99E-72	Vein	MTSS1
MYO1B	3.65E-76	0.601854	0.517	0.289	1.12E-71	Vein	MYO1B
GSTK1	5.19E-76	0.550458	0.608	0.396	1.60E-71	Vein	GSTK1
GSTM3	5.58E-76	0.572168	0.567	0.353	1.72E-71	Vein	GSTM3
C2CD4B	8.09E-76	0.187371	0.058	0.001	2.49E-71	Vein	C2CD4B
TRDN	8.75E-76	-0.491612	0.012	0.296	2.69E-71	Artery	TRDN
WDR54	1.28E-75	0.137984	0.134	0.02	3.95E-71	Vein	WDR54
MT1A	1.48E-75	0.912844	0.45	0.217	4.55E-71	Vein	MT1A
PHLDB1	1.80E-75	0.530753	0.438	0.208	5.53E-71	Vein	PHLDB1
NPR3	2.50E-75	-0.452538	0.007	0.288	7.68E-71	Artery	NPR3
ANTXR1	3.94E-75	-0.533412	0.327	0.634	1.21E-70	Artery	ANTXR1
RAB23	4.42E-75	-0.419325	0.081	0.389	1.36E-70	Artery	RAB23
RPS28	6.58E-75	0.499797	0.984	0.972	2.02E-70	Vein	RPS28
MICAL1	1.64E-74	0.529061	0.534	0.299	5.05E-70	Vein	MICAL1
AOPEP	1.66E-74	-0.54701	0.586	0.804	5.12E-70	Artery	AOPEP
PRRX1	1.67E-74	0.586753	0.852	0.785	5.14E-70	Vein	PRRX1
PPIA	1.67E-74	0.561237	0.935	0.857	5.15E-70	Vein	PPIA
PITPNC1	1.86E-74	0.214009	0.18	0.038	5.73E-70	Vein	PITPNC1
PYGB	3.44E-74	-0.504664	0.286	0.623	1.06E-69	Artery	PYGB
RNF217	2.96E-73	-0.502586	0.139	0.456	9.09E-69	Artery	RNF217
HSPH1	3.65E-73	-1.47538	0.443	0.72	1.12E-68	Artery	HSPH1
GGT5	4.70E-73	0.451074	0.407	0.181	1.44E-68	Vein	GGT5
ENO1	6.85E-73	-0.443712	0.604	0.818	2.11E-68	Artery	ENO1
LIMS1	8.07E-73	-0.554665	0.486	0.755	2.48E-68	Artery	LIMS1
ITIH4	9.08E-73	-0.49544	0.184	0.505	2.79E-68	Artery	ITIH4
PDK4	1.43E-72	1.17467	0.666	0.447	4.39E-68	Vein	PDK4
ARHGEF7-AS2	1.73E-72	0.127025	0.085	0.007	5.31E-68	Vein	ARHGEF7-AS2
SMS	2.06E-72	-0.405916	0.223	0.542	6.32E-68	Artery	SMS
GPX4	2.49E-72	-0.5697	0.773	0.884	7.65E-68	Artery	GPX4
RPL14	3.37E-72	0.463801	0.989	0.966	1.03E-67	Vein	RPL14
SETD7	4.34E-72	-0.469969	0.195	0.506	1.33E-67	Artery	SETD7
LTBP2	5.07E-72	-0.52314	0.042	0.33	1.56E-67	Artery	LTBP2
JAM3	7.04E-72	-0.4875	0.333	0.647	2.16E-67	Artery	JAM3
ARPC1A	8.65E-72	0.603049	0.726	0.587	2.66E-67	Vein	ARPC1A
LRRC8B	8.73E-72	0.162521	0.137	0.022	2.68E-67	Vein	LRRC8B
TOMM7	9.49E-72	-0.453843	0.897	0.935	2.92E-67	Artery	TOMM7
PDE2A	1.01E-71	0.138793	0.099	0.011	3.10E-67	Vein	PDE2A
CLIP1	1.07E-71	-0.633546	0.489	0.768	3.28E-67	Artery	CLIP1
SLC41A2	1.55E-71	-0.344768	0.017	0.288	4.76E-67	Artery	SLC41A2
PCDH10	1.56E-71	-0.486417	0.05	0.336	4.79E-67	Artery	PCDH10
IGFBPL1	2.23E-71	-0.333534	0.014	0.286	6.86E-67	Artery	IGFBPL1
ZNF385D	5.64E-71	-0.485117	0.122	0.427	1.73E-66	Artery	ZNF385D
CPQ	6.72E-71	-0.491945	0.395	0.682	2.06E-66	Artery	CPQ
NR2F2-AS1	7.53E-71	0.591903	0.513	0.284	2.31E-66	Vein	NR2F2-AS1
TCEAL4	1.72E-70	-0.821105	0.77	0.872	5.28E-66	Artery	TCEAL4
SSTR2	1.91E-70	0.232076	0.11	0.014	5.88E-66	Vein	SSTR2
IFITM1	2.16E-70	0.15432	0.123	0.018	6.63E-66	Vein	IFITM1
MN1	2.85E-70	-0.389758	0.056	0.341	8.76E-66	Artery	MN1
NFYB	3.37E-70	-0.45178	0.262	0.578	1.04E-65	Artery	NFYB
ALDH2	3.90E-70	-0.500206	0.624	0.819	1.20E-65	Artery	ALDH2
FGF2	4.42E-70	-0.359992	0.045	0.328	1.36E-65	Artery	FGF2
SH3BGR	4.83E-70	-0.470434	0.179	0.481	1.49E-65	Artery	SH3BGR
ERG	5.97E-70	-0.344864	0.012	0.279	1.83E-65	Artery	ERG
PMEPA1	6.64E-70	-0.523602	0.644	0.862	2.04E-65	Artery	PMEPA1
FLT1	1.19E-69	0.136404	0.064	0.003	3.65E-65	Vein	FLT1
NPR1	2.06E-69	-0.409555	0.009	0.272	6.33E-65	Artery	NPR1
INHBA	2.25E-69	-0.370246	0.212	0.541	6.90E-65	Artery	INHBA
BAG2	4.00E-69	-0.447394	0.241	0.559	1.23E-64	Artery	BAG2
PEBP1	4.61E-69	-0.460414	0.844	0.906	1.42E-64	Artery	PEBP1
MT-ND4	1.02E-68	-0.485043	0.999	0.999	3.15E-64	Artery	MT-ND4
PPP1R3C	1.12E-68	-0.577794	0.304	0.61	3.45E-64	Artery	PPP1R3C
GASK1B	1.16E-68	-0.371124	0.029	0.301	3.56E-64	Artery	GASK1B
PDE4DIP	1.41E-68	-0.517612	0.505	0.789	4.33E-64	Artery	PDE4DIP
LIF	1.56E-68	0.129245	0.064	0.003	4.79E-64	Vein	LIF
RNASE1	2.34E-68	0.294971	0.195	0.048	7.20E-64	Vein	RNASE1
SPART	2.80E-68	-0.495353	0.471	0.734	8.62E-64	Artery	SPART
EDNRB	3.28E-68	0.371308	0.226	0.064	1.01E-63	Vein	EDNRB
RPS18	3.36E-68	0.568003	0.994	0.98	1.03E-63	Vein	RPS18
SEMA4B	6.11E-68	0.276863	0.25	0.078	1.88E-63	Vein	SEMA4B
PPP1R12C	6.24E-68	0.598067	0.634	0.438	1.92E-63	Vein	PPP1R12C
MYBL1	9.65E-68	-0.520771	0.034	0.302	2.97E-63	Artery	MYBL1
JAG1	1.00E-67	0.663393	0.857	0.788	3.08E-63	Vein	JAG1
RAC1	1.26E-67	0.439118	0.92	0.854	3.88E-63	Vein	RAC1
PRKG1	1.92E-67	-0.585596	0.707	0.889	5.90E-63	Artery	PRKG1
TMC7	8.62E-67	0.108153	0.082	0.007	2.65E-62	Vein	TMC7
GNAQ	9.41E-67	-0.45371	0.283	0.595	2.89E-62	Artery	GNAQ
SH3BP2	1.69E-66	0.125291	0.101	0.012	5.19E-62	Vein	SH3BP2
ID1	1.91E-66	-0.584824	0.336	0.641	5.88E-62	Artery	ID1
MAOB	2.20E-66	-0.327683	0.03	0.297	6.75E-62	Artery	MAOB
MYH9	3.70E-66	-0.571766	0.858	0.942	1.14E-61	Artery	MYH9
TMTC1	4.45E-66	-0.486915	0.346	0.661	1.37E-61	Artery	TMTC1
ICOSLG	7.53E-66	0.121773	0.088	0.009	2.31E-61	Vein	ICOSLG
MAP1B	1.09E-65	-0.518389	0.935	0.968	3.35E-61	Artery	MAP1B
GNG12	1.32E-65	-0.486551	0.593	0.81	4.04E-61	Artery	GNG12
EEF2	1.71E-65	0.433335	0.945	0.941	5.24E-61	Vein	EEF2
TNC	1.86E-65	-1.08196	0.568	0.769	5.73E-61	Artery	TNC
CRIM1	2.02E-65	-0.778001	0.625	0.81	6.22E-61	Artery	CRIM1
ANGPTL1	4.07E-65	-0.481802	0.458	0.754	1.25E-60	Artery	ANGPTL1
PDGFA	7.97E-65	0.644966	0.771	0.663	2.45E-60	Vein	PDGFA
ACTN2	8.33E-65	-0.394288	0.019	0.275	2.56E-60	Artery	ACTN2
FZD3	9.83E-65	-0.418805	0.151	0.457	3.02E-60	Artery	FZD3
HLA-A	1.04E-64	0.587252	0.891	0.842	3.19E-60	Vein	HLA-A
ISCU	1.18E-64	-0.469479	0.662	0.821	3.63E-60	Artery	ISCU
EIF4A1	1.29E-64	0.667604	0.889	0.864	3.97E-60	Vein	EIF4A1
RPS27	2.00E-64	0.419518	0.995	0.991	6.16E-60	Vein	RPS27
TPD52L1	2.01E-64	-0.303328	0.023	0.28	6.17E-60	Artery	TPD52L1
PPP1R12B	2.13E-64	-0.547811	0.85	0.946	6.54E-60	Artery	PPP1R12B
AC002546.1	2.14E-64	0.186362	0.143	0.028	6.57E-60	Vein	AC002546.1
RTN4	2.38E-64	-0.467194	0.812	0.922	7.33E-60	Artery	RTN4
SATB1	3.06E-64	-0.37242	0.127	0.42	9.41E-60	Artery	SATB1
PPP1CB	3.45E-64	-0.490978	0.86	0.95	1.06E-59	Artery	PPP1CB
PPM1K	3.83E-64	-0.485819	0.256	0.561	1.18E-59	Artery	PPM1K
CD59	9.48E-64	0.575502	0.848	0.773	2.91E-59	Vein	CD59
SLC6A9	9.91E-64	0.136328	0.114	0.017	3.05E-59	Vein	SLC6A9
RPL26	1.33E-63	0.470586	0.986	0.971	4.07E-59	Vein	RPL26
HLX	1.47E-63	0.214439	0.166	0.038	4.52E-59	Vein	HLX
SOD3	2.13E-63	0.47262	0.947	0.895	6.53E-59	Vein	SOD3
C12orf57	3.12E-63	0.52043	0.874	0.783	9.59E-59	Vein	C12orf57
RAB6B	3.17E-63	0.358065	0.331	0.14	9.74E-59	Vein	RAB6B
C20orf27	5.00E-63	0.432585	0.314	0.13	1.54E-58	Vein	C20orf27
YAP1	1.02E-62	-0.520999	0.511	0.771	3.13E-58	Artery	YAP1
WASF2	1.05E-62	0.537207	0.883	0.82	3.23E-58	Vein	WASF2
AP003071.4	1.14E-62	0.263343	0.174	0.042	3.50E-58	Vein	AP003071.4
MTRNR2L10	1.15E-62	-0.340469	0.041	0.3	3.54E-58	Artery	MTRNR2L10
COL4A1	1.34E-62	-0.605561	0.798	0.955	4.11E-58	Artery	COL4A1
RPSA	1.52E-62	0.670518	0.93	0.884	4.66E-58	Vein	RPSA
CD47	2.42E-62	-0.388455	0.268	0.574	7.43E-58	Artery	CD47
CHMP1B	3.67E-62	-0.72857	0.374	0.661	1.13E-57	Artery	CHMP1B
LINC02762	3.71E-62	-0.349046	0.129	0.421	1.14E-57	Artery	LINC02762
CKB	3.81E-62	-0.566965	0.658	0.866	1.17E-57	Artery	CKB
PRNP	1.01E-61	-0.442642	0.33	0.625	3.09E-57	Artery	PRNP
MCF2L	1.32E-61	0.246781	0.188	0.05	4.05E-57	Vein	MCF2L
RBM24	1.72E-61	0.417572	0.476	0.262	5.30E-57	Vein	RBM24
MORF4L1	3.25E-61	-0.427711	0.833	0.906	9.99E-57	Artery	MORF4L1
SLC20A2	3.61E-61	-0.445326	0.319	0.609	1.11E-56	Artery	SLC20A2
SYNC	4.09E-61	-0.378226	0.172	0.464	1.26E-56	Artery	SYNC
STMN3	4.27E-61	0.152671	0.128	0.023	1.31E-56	Vein	STMN3
NTN1	5.89E-61	-0.34733	0.063	0.327	1.81E-56	Artery	NTN1
EBF3	6.22E-61	0.13219	0.105	0.015	1.91E-56	Vein	EBF3
KLF9	1.11E-60	0.521756	0.865	0.823	3.42E-56	Vein	KLF9
TRIM36	1.25E-60	-0.29888	0.022	0.266	3.83E-56	Artery	TRIM36
CMIP	1.62E-60	0.18722	0.161	0.037	4.98E-56	Vein	CMIP
LNPEP	1.97E-60	-0.471761	0.347	0.631	6.06E-56	Artery	LNPEP
MGST3	2.84E-60	0.466661	0.93	0.898	8.73E-56	Vein	MGST3
ENAH	4.24E-60	-0.547202	0.676	0.857	1.30E-55	Artery	ENAH
AP003548.1	5.70E-60	-0.267968	0.001	0.229	1.75E-55	Artery	AP003548.1
NPTXR	7.46E-60	-0.337741	0.059	0.319	2.29E-55	Artery	NPTXR
PPP1R15A	8.57E-60	0.870816	0.909	0.893	2.64E-55	Vein	PPP1R15A
ATP13A3	1.27E-59	-0.519881	0.302	0.586	3.91E-55	Artery	ATP13A3
RPL10	2.40E-59	0.460089	0.994	0.994	7.38E-55	Vein	RPL10
SPINT2	3.04E-59	-0.356131	0.015	0.25	9.34E-55	Artery	SPINT2
CCL19	3.78E-59	0.196136	0.098	0.014	1.16E-54	Vein	CCL19
PAK3	3.84E-59	-0.287785	0.004	0.233	1.18E-54	Artery	PAK3
IGFBP3	4.00E-59	-0.496214	0.079	0.346	1.23E-54	Artery	IGFBP3
TAGLN2	4.34E-59	0.533375	0.752	0.639	1.33E-54	Vein	TAGLN2
ADI1	5.34E-59	-0.490388	0.601	0.781	1.64E-54	Artery	ADI1
EIF3K	6.82E-59	0.479416	0.826	0.76	2.10E-54	Vein	EIF3K
BMPR1A	7.84E-59	-0.372562	0.206	0.496	2.41E-54	Artery	BMPR1A
IQCK	8.33E-59	0.163846	0.136	0.027	2.56E-54	Vein	IQCK
PREX2	1.03E-58	-0.332318	0.022	0.26	3.17E-54	Artery	PREX2
HIST3H2A	1.04E-58	0.130804	0.121	0.022	3.19E-54	Vein	HIST3H2A
CCDC3	1.34E-58	0.533347	0.838	0.736	4.13E-54	Vein	CCDC3
ALDH3A2	1.47E-58	-0.425982	0.204	0.489	4.52E-54	Artery	ALDH3A2
GYPC	2.31E-58	-0.408	0.462	0.725	7.09E-54	Artery	GYPC
CARNS1	2.31E-58	0.299217	0.227	0.075	7.11E-54	Vein	CARNS1
HCFC1R1	3.81E-58	0.51451	0.835	0.695	1.17E-53	Vein	HCFC1R1
NET1	4.32E-58	0.940265	0.777	0.701	1.33E-53	Vein	NET1
FAT4	7.13E-58	-0.320313	0.03	0.271	2.19E-53	Artery	FAT4
ITGA9	7.61E-58	-0.275228	0.009	0.238	2.34E-53	Artery	ITGA9
PCK1	8.67E-58	0.188913	0.075	0.007	2.67E-53	Vein	PCK1
TCF4	9.44E-58	0.583619	0.615	0.442	2.90E-53	Vein	TCF4
CALM1	1.60E-57	-0.408723	0.951	0.969	4.93E-53	Artery	CALM1
SMAD7	2.14E-57	-0.480835	0.365	0.644	6.56E-53	Artery	SMAD7
ADAMTS1	3.98E-57	0.634938	0.932	0.896	1.22E-52	Vein	ADAMTS1
SOX13	5.76E-57	0.402464	0.345	0.158	1.77E-52	Vein	SOX13
NT5DC3	6.37E-57	-0.372956	0.152	0.435	1.96E-52	Artery	NT5DC3
FGD4	6.60E-57	0.48966	0.498	0.296	2.03E-52	Vein	FGD4
KCNE4	7.15E-57	0.935801	0.565	0.4	2.20E-52	Vein	KCNE4
A1BG	7.45E-57	0.382524	0.484	0.277	2.29E-52	Vein	A1BG
MTLN	9.93E-57	-0.362762	0.279	0.565	3.05E-52	Artery	MTLN
TSPAN18	1.78E-56	-0.252903	0.019	0.249	5.46E-52	Artery	TSPAN18
RPL38	2.12E-56	-0.440927	0.942	0.942	6.51E-52	Artery	RPL38
PDE4C	2.51E-56	0.316137	0.179	0.049	7.72E-52	Vein	PDE4C
CYBA	2.82E-56	0.292691	0.222	0.072	8.68E-52	Vein	CYBA
TSC22D1	3.25E-56	0.598397	0.936	0.918	9.99E-52	Vein	TSC22D1
EIF1	3.51E-56	0.349403	0.997	0.985	1.08E-51	Vein	EIF1
IGFBP6	4.04E-56	1.00466	0.837	0.766	1.24E-51	Vein	IGFBP6
CYP7B1	4.91E-56	0.391448	0.385	0.188	1.51E-51	Vein	CYP7B1
GPC6	5.43E-56	-0.344475	0.131	0.406	1.67E-51	Artery	GPC6
B4GALNT1	6.12E-56	0.159538	0.121	0.023	1.88E-51	Vein	B4GALNT1
MTHFD1L	7.07E-56	-0.356654	0.047	0.286	2.17E-51	Artery	MTHFD1L
SORBS2	8.10E-56	-0.485959	0.87	0.968	2.49E-51	Artery	SORBS2
HS6ST3	9.94E-56	-0.297831	0.013	0.236	3.06E-51	Artery	HS6ST3
DLC1	1.10E-55	0.504568	0.626	0.445	3.37E-51	Vein	DLC1
RPS16	2.42E-55	0.440231	0.982	0.958	7.43E-51	Vein	RPS16
COL8A2	2.81E-55	-0.260837	0.03	0.263	8.63E-51	Artery	COL8A2
HIF3A	3.49E-55	-0.373501	0.088	0.346	1.07E-50	Artery	HIF3A
SESN3	3.72E-55	-0.441892	0.322	0.601	1.14E-50	Artery	SESN3
LGALSL	3.74E-55	0.456188	0.485	0.297	1.15E-50	Vein	LGALSL
IFITM3	4.49E-55	0.464492	0.96	0.93	1.38E-50	Vein	IFITM3
RPL10A	4.70E-55	0.424747	0.977	0.958	1.45E-50	Vein	RPL10A
CSRP2	5.78E-55	0.602528	0.907	0.874	1.78E-50	Vein	CSRP2
DIAPH2	5.87E-55	-0.513058	0.431	0.686	1.81E-50	Artery	DIAPH2
PGRMC1	9.85E-55	-0.392728	0.464	0.702	3.03E-50	Artery	PGRMC1
MRPL23	1.02E-54	0.347534	0.367	0.176	3.13E-50	Vein	MRPL23
THRB	1.23E-54	-0.336858	0.096	0.353	3.79E-50	Artery	THRB
TTC39B	1.33E-54	-0.368908	0.108	0.368	4.08E-50	Artery	TTC39B
LRRC32	1.45E-54	0.463547	0.469	0.273	4.46E-50	Vein	LRRC32
SVIP	1.74E-54	-0.297139	0.151	0.426	5.35E-50	Artery	SVIP
NCS1	2.01E-54	-0.38341	0.444	0.697	6.17E-50	Artery	NCS1
VASP	2.11E-54	0.494546	0.722	0.618	6.49E-50	Vein	VASP
MIR193BHG	2.45E-54	-0.274647	0.02	0.244	7.53E-50	Artery	MIR193BHG
NOTCH2	3.64E-54	-0.391704	0.243	0.52	1.12E-49	Artery	NOTCH2
LIMS2	4.47E-54	-0.416479	0.523	0.768	1.37E-49	Artery	LIMS2
PGR	4.74E-54	-0.352859	0.104	0.36	1.46E-49	Artery	PGR
CIRBP	7.36E-54	0.511964	0.925	0.896	2.26E-49	Vein	CIRBP
CSDE1	8.87E-54	-0.414605	0.861	0.926	2.73E-49	Artery	CSDE1
CCSER2	1.04E-53	-0.39096	0.428	0.692	3.21E-49	Artery	CCSER2
AP001528.1	1.13E-53	0.322357	0.252	0.094	3.48E-49	Vein	AP001528.1
EPHX1	1.35E-53	0.483088	0.486	0.303	4.16E-49	Vein	EPHX1
LTBP3	1.35E-53	-0.423404	0.442	0.703	4.16E-49	Artery	LTBP3
HLA-E	1.49E-53	0.58378	0.815	0.726	4.59E-49	Vein	HLA-E
NFKBIA	2.89E-53	0.617368	0.866	0.78	8.89E-49	Vein	NFKBIA
HTRA1	3.19E-53	-0.440442	0.422	0.682	9.80E-49	Artery	HTRA1
TSTD1	3.78E-53	-0.318576	0.075	0.313	1.16E-48	Artery	TSTD1
RPS29	4.49E-53	-0.446622	0.941	0.963	1.38E-48	Artery	RPS29
AC245297.3	5.60E-53	-0.35069	0.343	0.623	1.72E-48	Artery	AC245297.3
AL645608.7	5.97E-53	0.264164	0.157	0.04	1.83E-48	Vein	AL645608.7
GABARAP	6.55E-53	0.435791	0.915	0.839	2.01E-48	Vein	GABARAP
ATP5F1D	6.99E-53	0.4419	0.835	0.772	2.15E-48	Vein	ATP5F1D
UQCRH	8.52E-53	0.473462	0.837	0.767	2.62E-48	Vein	UQCRH
HRH1	1.09E-52	-0.258085	0.013	0.226	3.35E-48	Artery	HRH1
HTR2A	1.14E-52	-0.34666	0.028	0.249	3.51E-48	Artery	HTR2A
AK4	1.70E-52	-0.334766	0.172	0.438	5.22E-48	Artery	AK4
PSAP	1.80E-52	-0.404698	0.809	0.907	5.52E-48	Artery	PSAP
UBA2	2.01E-52	0.487193	0.834	0.808	6.17E-48	Vein	UBA2
ENPP4	2.84E-52	-0.345492	0.13	0.389	8.73E-48	Artery	ENPP4
RPS13	3.19E-52	0.440254	0.973	0.947	9.80E-48	Vein	RPS13
CALM2	3.77E-52	0.370875	0.968	0.95	1.16E-47	Vein	CALM2
RPS14	3.79E-52	0.403288	0.988	0.979	1.16E-47	Vein	RPS14
CDC26	3.83E-52	-0.275028	0.127	0.389	1.18E-47	Artery	CDC26
CRISPLD1	4.77E-52	-0.268908	0.001	0.204	1.47E-47	Artery	CRISPLD1
BTF3	4.81E-52	0.437347	0.948	0.887	1.48E-47	Vein	BTF3
GSN	5.12E-52	0.396523	0.96	0.942	1.57E-47	Vein	GSN
IL6R	5.48E-52	0.467956	0.436	0.242	1.68E-47	Vein	IL6R
EIF5A	6.05E-52	0.502101	0.711	0.598	1.86E-47	Vein	EIF5A
DCTN2	7.07E-52	0.484035	0.715	0.6	2.17E-47	Vein	DCTN2
NLGN1	8.52E-52	-0.265083	0.003	0.206	2.62E-47	Artery	NLGN1
CABP1	9.69E-52	0.30912	0.297	0.126	2.98E-47	Vein	CABP1
RAI14	2.08E-51	-0.328638	0.084	0.324	6.39E-47	Artery	RAI14
DDIT4	3.31E-51	0.669057	0.739	0.564	1.02E-46	Vein	DDIT4
CH25H	4.55E-51	0.731966	0.199	0.062	1.40E-46	Vein	CH25H
MXI1	4.64E-51	-0.405689	0.638	0.83	1.43E-46	Artery	MXI1
APOE	6.36E-51	1.16824	0.198	0.064	1.96E-46	Vein	APOE
MGP	1.28E-50	-0.533326	0.987	0.992	3.92E-46	Artery	MGP
AFDN	1.47E-50	-0.274489	0.037	0.258	4.51E-46	Artery	AFDN
SAMD4A	1.52E-50	-0.424108	0.206	0.466	4.67E-46	Artery	SAMD4A
SPCS3	1.58E-50	-0.384856	0.385	0.649	4.85E-46	Artery	SPCS3
TRIM47	1.76E-50	0.540092	0.482	0.312	5.40E-46	Vein	TRIM47
SAP30	1.80E-50	-0.316259	0.234	0.508	5.54E-46	Artery	SAP30
MIF	1.84E-50	0.653394	0.879	0.774	5.67E-46	Vein	MIF
BCL3	2.36E-50	0.23753	0.229	0.082	7.26E-46	Vein	BCL3
MARCKS	3.19E-50	-0.375635	0.151	0.409	9.81E-46	Artery	MARCKS
SQSTM1	3.29E-50	-0.458343	0.794	0.914	1.01E-45	Artery	SQSTM1
ALDH1A1	3.86E-50	0.388996	0.341	0.16	1.19E-45	Vein	ALDH1A1
COPRS	5.36E-50	-0.41178	0.428	0.655	1.65E-45	Artery	COPRS
PERP	9.17E-50	-0.284957	0.179	0.445	2.82E-45	Artery	PERP
IRS2	1.02E-49	-0.401079	0.225	0.488	3.13E-45	Artery	IRS2
S100A16	1.13E-49	-0.178255	0.117	0.378	3.47E-45	Artery	S100A16
TMCC3	1.16E-49	0.139929	0.094	0.015	3.56E-45	Vein	TMCC3
LOXL2	1.19E-49	0.162896	0.122	0.026	3.65E-45	Vein	LOXL2
INTU	1.79E-49	-0.367418	0.078	0.313	5.49E-45	Artery	INTU
AIF1L	2.16E-49	-0.301248	0.129	0.388	6.65E-45	Artery	AIF1L
EIF5B	2.24E-49	-0.488434	0.677	0.836	6.89E-45	Artery	EIF5B
RAD51B	2.31E-49	0.155059	0.114	0.023	7.10E-45	Vein	RAD51B
FUS	2.57E-49	0.452001	0.848	0.777	7.91E-45	Vein	FUS
EOGT	3.34E-49	-0.375404	0.174	0.431	1.03E-44	Artery	EOGT
ARPP19	3.66E-49	-0.393358	0.493	0.728	1.12E-44	Artery	ARPP19
ARPC5	3.95E-49	0.455273	0.84	0.795	1.22E-44	Vein	ARPC5
WIPF1	4.15E-49	-0.343776	0.242	0.512	1.27E-44	Artery	WIPF1
CSNK2B	4.39E-49	0.466218	0.664	0.528	1.35E-44	Vein	CSNK2B
CYP4B1	5.45E-49	0.106302	0.052	0.003	1.68E-44	Vein	CYP4B1
PLAAT3	6.25E-49	-0.381871	0.355	0.6	1.92E-44	Artery	PLAAT3
TRNP1	7.45E-49	0.432362	0.457	0.276	2.29E-44	Vein	TRNP1
TGFBR1	9.11E-49	-0.333876	0.127	0.375	2.80E-44	Artery	TGFBR1
ALCAM	1.01E-48	-0.396057	0.106	0.339	3.11E-44	Artery	ALCAM
PLA2R1	1.15E-48	-0.337062	0.081	0.316	3.54E-44	Artery	PLA2R1
MBP	1.26E-48	-0.263653	0.032	0.242	3.86E-44	Artery	MBP
SMDT1	1.45E-48	-0.424884	0.506	0.706	4.47E-44	Artery	SMDT1
TNS1	2.21E-48	-0.468078	0.945	0.972	6.79E-44	Artery	TNS1
EPHA2	2.28E-48	0.133126	0.082	0.012	6.99E-44	Vein	EPHA2
DBI	2.34E-48	0.477354	0.794	0.703	7.20E-44	Vein	DBI
UACA	3.54E-48	-0.404123	0.465	0.707	1.09E-43	Artery	UACA
CRYAB	4.79E-48	-0.382041	0.911	0.957	1.47E-43	Artery	CRYAB
EIF1AY	6.27E-48	-0.304836	0.066	0.293	1.93E-43	Artery	EIF1AY
EPN2	7.73E-48	0.506537	0.661	0.518	2.38E-43	Vein	EPN2
RYR2	8.76E-48	-0.398093	0.244	0.519	2.69E-43	Artery	RYR2
SNHG15	9.97E-48	0.518563	0.384	0.21	3.06E-43	Vein	SNHG15
MTURN	1.20E-47	-0.348458	0.324	0.589	3.67E-43	Artery	MTURN
WEE1	1.23E-47	-0.322888	0.108	0.349	3.79E-43	Artery	WEE1
LRIG1	1.73E-47	-0.342211	0.197	0.451	5.33E-43	Artery	LRIG1
MYO10	2.55E-47	-0.275066	0.038	0.25	7.84E-43	Artery	MYO10
THBS1	2.70E-47	0.696897	0.53	0.332	8.29E-43	Vein	THBS1
PALLD	2.96E-47	-0.411673	0.915	0.956	9.09E-43	Artery	PALLD
NR2F2	3.38E-47	0.538631	0.897	0.851	1.04E-42	Vein	NR2F2
ADCY1	3.54E-47	0.216624	0.149	0.04	1.09E-42	Vein	ADCY1
HSPB2	3.89E-47	0.481114	0.621	0.468	1.20E-42	Vein	HSPB2
ETS2	3.99E-47	0.531762	0.665	0.519	1.23E-42	Vein	ETS2
HS3ST1	4.18E-47	0.117925	0.082	0.012	1.29E-42	Vein	HS3ST1
PGM1	4.32E-47	-0.221504	0.099	0.34	1.33E-42	Artery	PGM1
TXNRD1	4.46E-47	-0.370442	0.266	0.527	1.37E-42	Artery	TXNRD1
ABTB1	5.00E-47	0.406533	0.486	0.317	1.54E-42	Vein	ABTB1
C15orf39	6.32E-47	0.31657	0.307	0.14	1.94E-42	Vein	C15orf39
EEF1D	6.74E-47	0.449695	0.917	0.872	2.07E-42	Vein	EEF1D
LINC00702	1.28E-46	-0.421567	0.494	0.725	3.94E-42	Artery	LINC00702
VPS13A	1.31E-46	-0.441366	0.264	0.521	4.03E-42	Artery	VPS13A
ANXA4	1.61E-46	-0.35439	0.442	0.674	4.95E-42	Artery	ANXA4
PEA15	1.72E-46	-0.351603	0.401	0.655	5.27E-42	Artery	PEA15
PDZRN4	1.80E-46	-0.281544	0.168	0.429	5.54E-42	Artery	PDZRN4
MAP4K3-DT	2.09E-46	-0.314605	0.179	0.43	6.43E-42	Artery	MAP4K3-DT
PKD2	2.25E-46	-0.39087	0.31	0.562	6.92E-42	Artery	PKD2
ROR1	2.93E-46	-0.311749	0.154	0.403	9.01E-42	Artery	ROR1
CCNL1	3.25E-46	0.551283	0.885	0.834	9.99E-42	Vein	CCNL1
TRARG1	7.42E-46	-0.244611	0.022	0.219	2.28E-41	Artery	TRARG1
AL139246.5	8.42E-46	0.118529	0.095	0.017	2.59E-41	Vein	AL139246.5
PLIN4	8.92E-46	0.101062	0.064	0.007	2.74E-41	Vein	PLIN4
FERMT2	9.01E-46	-0.396527	0.801	0.915	2.77E-41	Artery	FERMT2
NOL3	9.04E-46	0.448621	0.505	0.341	2.78E-41	Vein	NOL3
VCAN	9.53E-46	-0.472902	0.083	0.306	2.93E-41	Artery	VCAN
CSF1	1.03E-45	0.297343	0.25	0.101	3.17E-41	Vein	CSF1
DSEL	1.27E-45	-0.349478	0.159	0.402	3.92E-41	Artery	DSEL
MIR4435-2HG	1.55E-45	0.330671	0.35	0.178	4.77E-41	Vein	MIR4435-2HG
FAM133A	1.64E-45	-0.235677	0.003	0.185	5.03E-41	Artery	FAM133A
DIPK2A	1.98E-45	-0.320847	0.14	0.38	6.09E-41	Artery	DIPK2A
IMPAD1	2.47E-45	-0.361911	0.354	0.605	7.60E-41	Artery	IMPAD1
SORBS3	2.74E-45	0.462855	0.76	0.672	8.41E-41	Vein	SORBS3
RCAN2	3.02E-45	0.442614	0.863	0.809	9.28E-41	Vein	RCAN2
SELENOM	3.21E-45	-0.373337	0.952	0.956	9.85E-41	Artery	SELENOM
NENF	3.72E-45	0.459536	0.799	0.688	1.14E-40	Vein	NENF
CAMK2G	3.73E-45	-0.355117	0.507	0.736	1.15E-40	Artery	CAMK2G
ARHGAP17	4.02E-45	0.388689	0.467	0.288	1.24E-40	Vein	ARHGAP17
FHL3	4.26E-45	0.41905	0.455	0.285	1.31E-40	Vein	FHL3
CYTOR	4.27E-45	0.622354	0.496	0.337	1.31E-40	Vein	CYTOR
SPOPL	4.42E-45	-0.340327	0.245	0.501	1.36E-40	Artery	SPOPL
SNAI2	4.76E-45	0.294109	0.26	0.108	1.46E-40	Vein	SNAI2
LINC00989	4.79E-45	0.212057	0.166	0.051	1.47E-40	Vein	LINC00989
NPTN	5.17E-45	-0.377878	0.566	0.758	1.59E-40	Artery	NPTN
CCL2	5.21E-45	0.981961	0.503	0.314	1.60E-40	Vein	CCL2
TMEM43	5.44E-45	-0.355053	0.389	0.639	1.67E-40	Artery	TMEM43
ACTN4	5.73E-45	-0.445849	0.918	0.957	1.76E-40	Artery	ACTN4
SH3D19	6.01E-45	-0.302437	0.212	0.464	1.85E-40	Artery	SH3D19
CHRD	9.08E-45	0.201483	0.201	0.07	2.79E-40	Vein	CHRD
RASGRP2	9.12E-45	0.466433	0.642	0.51	2.80E-40	Vein	RASGRP2
MPP6	9.41E-45	-0.231692	0.043	0.25	2.89E-40	Artery	MPP6
NDUFC1	9.88E-45	-0.386184	0.639	0.785	3.04E-40	Artery	NDUFC1
C1QTNF7	1.03E-44	-0.309156	0.142	0.384	3.17E-40	Artery	C1QTNF7
TBX18	1.03E-44	-0.377505	0.212	0.466	3.18E-40	Artery	TBX18
TM4SF1	1.09E-44	-0.233008	0.238	0.507	3.34E-40	Artery	TM4SF1
REM1	1.34E-44	0.298122	0.257	0.109	4.12E-40	Vein	REM1
ERBB2	1.50E-44	-0.27194	0.155	0.405	4.60E-40	Artery	ERBB2
PDLIM5	1.59E-44	-0.376844	0.736	0.905	4.89E-40	Artery	PDLIM5
BHMT2	1.83E-44	-0.235872	0.013	0.199	5.62E-40	Artery	BHMT2
RPL39	2.10E-44	0.406618	0.977	0.949	6.46E-40	Vein	RPL39
SH3BP5	3.22E-44	-0.359619	0.166	0.404	9.90E-40	Artery	SH3BP5
GADD45A	4.32E-44	-0.514919	0.567	0.757	1.33E-39	Artery	GADD45A
FKBP10	5.15E-44	0.348113	0.392	0.222	1.58E-39	Vein	FKBP10
SPRY2	6.29E-44	0.382595	0.392	0.218	1.93E-39	Vein	SPRY2
SSBP4	7.49E-44	0.342044	0.397	0.223	2.30E-39	Vein	SSBP4
NEK7	8.07E-44	-0.353542	0.372	0.623	2.48E-39	Artery	NEK7
TAB2	9.13E-44	-0.269835	0.119	0.352	2.80E-39	Artery	TAB2
SNHG29	1.04E-43	0.497675	0.901	0.832	3.19E-39	Vein	SNHG29
HSPA2	1.13E-43	-0.296472	0.142	0.376	3.48E-39	Artery	HSPA2
EFNA5	1.16E-43	-0.225331	0.003	0.178	3.57E-39	Artery	EFNA5
RPL23A	1.17E-43	-0.366609	0.977	0.981	3.61E-39	Artery	RPL23A
USP9Y	1.31E-43	-0.304789	0.049	0.252	4.02E-39	Artery	USP9Y
HDAC9	1.33E-43	-0.246682	0.056	0.263	4.10E-39	Artery	HDAC9
ENPP2	1.58E-43	-0.258757	0.012	0.192	4.85E-39	Artery	ENPP2
RGS10	1.75E-43	0.15685	0.152	0.044	5.37E-39	Vein	RGS10
PLXND1	2.07E-43	0.356996	0.409	0.232	6.35E-39	Vein	PLXND1
ARHGAP42	2.12E-43	0.303995	0.286	0.13	6.53E-39	Vein	ARHGAP42
KNOP1	2.18E-43	0.306687	0.254	0.108	6.71E-39	Vein	KNOP1
PDE1C	2.92E-43	-0.219807	0.004	0.179	8.98E-39	Artery	PDE1C
ECH1	2.96E-43	0.457304	0.579	0.443	9.10E-39	Vein	ECH1
BHLHE40	3.07E-43	0.464523	0.751	0.622	9.42E-39	Vein	BHLHE40
BTC	4.58E-43	-0.234999	0.054	0.257	1.41E-38	Artery	BTC
CFL1	4.84E-43	0.392412	0.93	0.88	1.49E-38	Vein	CFL1
NOVA1	4.98E-43	-0.308337	0.125	0.355	1.53E-38	Artery	NOVA1
GJA1	5.22E-43	-0.26914	0.022	0.209	1.60E-38	Artery	GJA1
AP2M1	5.31E-43	0.419343	0.737	0.668	1.63E-38	Vein	AP2M1
MORF4L2	5.58E-43	-0.410273	0.555	0.751	1.72E-38	Artery	MORF4L2
RELL1	5.73E-43	0.399968	0.451	0.281	1.76E-38	Vein	RELL1
SDC2	5.91E-43	-0.395195	0.549	0.747	1.82E-38	Artery	SDC2
ARL5A	6.69E-43	-0.353601	0.409	0.645	2.06E-38	Artery	ARL5A
LGI2	8.73E-43	-0.286862	0.036	0.226	2.68E-38	Artery	LGI2
CHSY1	9.07E-43	0.394917	0.407	0.234	2.79E-38	Vein	CHSY1
CHSY3	9.10E-43	-0.218901	0.019	0.202	2.80E-38	Artery	CHSY3
PTEN	1.05E-42	0.427345	0.781	0.699	3.23E-38	Vein	PTEN
MYL9	1.06E-42	0.388866	0.986	0.998	3.27E-38	Vein	MYL9
RAB21	1.11E-42	-0.447231	0.584	0.789	3.41E-38	Artery	RAB21
CCDC85B	1.22E-42	-0.357974	0.551	0.77	3.76E-38	Artery	CCDC85B
TJP2	1.41E-42	-0.338486	0.104	0.319	4.32E-38	Artery	TJP2
NQO1	1.65E-42	-0.306803	0.086	0.296	5.08E-38	Artery	NQO1
CFD	1.83E-42	0.414615	0.377	0.205	5.62E-38	Vein	CFD
INAFM2	1.94E-42	-0.281112	0.161	0.396	5.97E-38	Artery	INAFM2
PPM1L	2.59E-42	0.374953	0.497	0.321	7.95E-38	Vein	PPM1L
KLF13	2.64E-42	0.469008	0.63	0.506	8.12E-38	Vein	KLF13
HAND2	2.79E-42	-0.236423	0.035	0.226	8.58E-38	Artery	HAND2
ID3	2.80E-42	-0.382692	0.723	0.888	8.59E-38	Artery	ID3
TPM3	3.53E-42	0.471664	0.54	0.391	1.08E-37	Vein	TPM3
TSPAN14	4.37E-42	0.290791	0.279	0.128	1.34E-37	Vein	TSPAN14
OSBPL1A	4.67E-42	0.442793	0.665	0.561	1.44E-37	Vein	OSBPL1A
FBXW5	4.79E-42	-0.389609	0.562	0.769	1.47E-37	Artery	FBXW5
RPL11	5.54E-42	0.341708	0.993	0.979	1.70E-37	Vein	RPL11
TSPAN12	6.97E-42	-0.227318	0.095	0.313	2.14E-37	Artery	TSPAN12
KCNK15	8.55E-42	-0.256274	0.005	0.175	2.63E-37	Artery	KCNK15
SEMA3C	1.15E-41	-0.226075	0.02	0.199	3.55E-37	Artery	SEMA3C
CNN2	1.60E-41	0.421349	0.601	0.464	4.92E-37	Vein	CNN2
PPP1CA	2.27E-41	0.378683	0.487	0.335	6.99E-37	Vein	PPP1CA
CLEC2B	2.79E-41	0.157777	0.087	0.016	8.58E-37	Vein	CLEC2B
IRX2	3.25E-41	0.119955	0.124	0.031	9.99E-37	Vein	IRX2
SPTAN1	3.74E-41	-0.341155	0.397	0.653	1.15E-36	Artery	SPTAN1
ARHGDIB	4.26E-41	0.428825	0.242	0.107	1.31E-36	Vein	ARHGDIB
SLC1A5	4.40E-41	-0.227908	0.121	0.345	1.35E-36	Artery	SLC1A5
CALD1	4.51E-41	-0.336443	0.991	0.998	1.39E-36	Artery	CALD1
ICAM1	4.60E-41	0.227836	0.116	0.028	1.41E-36	Vein	ICAM1
PROCR	5.11E-41	0.21678	0.186	0.066	1.57E-36	Vein	PROCR
YPEL3	5.15E-41	0.434567	0.64	0.505	1.58E-36	Vein	YPEL3
LRP5	7.69E-41	-0.205648	0.096	0.317	2.36E-36	Artery	LRP5
TCEAL2	9.47E-41	-0.335865	0.106	0.325	2.91E-36	Artery	TCEAL2
AMD1	1.17E-40	-0.372269	0.381	0.614	3.59E-36	Artery	AMD1
PLEKHA4	1.19E-40	0.38588	0.424	0.256	3.64E-36	Vein	PLEKHA4
HABP4	1.58E-40	-0.312674	0.291	0.533	4.86E-36	Artery	HABP4
IGF1R	1.61E-40	-0.390987	0.375	0.626	4.94E-36	Artery	IGF1R
STEAP2	1.91E-40	-0.193854	0.025	0.204	5.86E-36	Artery	STEAP2
NFIX	2.48E-40	-0.332015	0.562	0.78	7.61E-36	Artery	NFIX
NPNT	2.67E-40	-0.428243	0.461	0.684	8.19E-36	Artery	NPNT
PLD5	2.72E-40	-0.224152	0.001	0.163	8.35E-36	Artery	PLD5
ATP5PO	2.84E-40	0.397298	0.778	0.685	8.74E-36	Vein	ATP5PO
HOXA10	3.09E-40	-0.26945	0.18	0.419	9.51E-36	Artery	HOXA10
ERGIC2	3.37E-40	-0.29389	0.323	0.567	1.04E-35	Artery	ERGIC2
MMP16	3.89E-40	-0.215503	0	0.16	1.19E-35	Artery	MMP16
PLCG2	4.73E-40	-0.714526	0.652	0.84	1.45E-35	Artery	PLCG2
DOCK10	4.95E-40	-0.374313	0.192	0.414	1.52E-35	Artery	DOCK10
PAWR	5.84E-40	-0.37836	0.592	0.785	1.79E-35	Artery	PAWR
PCGF5	6.65E-40	-0.396076	0.499	0.72	2.05E-35	Artery	PCGF5
ZBTB16	6.74E-40	0.534118	0.916	0.865	2.07E-35	Vein	ZBTB16
ELN	6.82E-40	-0.61547	0.414	0.649	2.10E-35	Artery	ELN
CSAD	8.22E-40	0.494047	0.46	0.305	2.53E-35	Vein	CSAD
MAGI2-AS3	8.41E-40	-0.333117	0.379	0.628	2.59E-35	Artery	MAGI2-AS3
DST	8.42E-40	-0.477639	0.821	0.947	2.59E-35	Artery	DST
ATP9A	9.05E-40	-0.259408	0.127	0.348	2.78E-35	Artery	ATP9A
SMCO4	1.05E-39	-0.180704	0.041	0.225	3.24E-35	Artery	SMCO4
GAB1	1.48E-39	-0.272847	0.127	0.345	4.55E-35	Artery	GAB1
FAM13C	1.71E-39	-0.258302	0.107	0.315	5.25E-35	Artery	FAM13C
MAN2B2	2.05E-39	-0.240835	0.141	0.362	6.31E-35	Artery	MAN2B2
TNS2	2.06E-39	0.568077	0.713	0.627	6.32E-35	Vein	TNS2
KDELR1	2.16E-39	0.410306	0.705	0.6	6.64E-35	Vein	KDELR1
INF2	2.34E-39	0.452666	0.509	0.355	7.20E-35	Vein	INF2
ARHGAP6	2.50E-39	0.366262	0.431	0.265	7.68E-35	Vein	ARHGAP6
SMAD6	2.57E-39	-0.201389	0.015	0.184	7.90E-35	Artery	SMAD6
ECM1	2.78E-39	0.129012	0.113	0.028	8.55E-35	Vein	ECM1
AC130466.1	3.54E-39	0.101102	0.074	0.012	1.09E-34	Vein	AC130466.1
ME1	4.66E-39	-0.193777	0.018	0.188	1.43E-34	Artery	ME1
TCF7L2	4.94E-39	-0.349817	0.431	0.656	1.52E-34	Artery	TCF7L2
MRFAP1	6.65E-39	-0.324892	0.779	0.87	2.04E-34	Artery	MRFAP1
ATP5F1B	6.89E-39	0.435594	0.764	0.693	2.12E-34	Vein	ATP5F1B
PRKACB	7.31E-39	-0.263694	0.242	0.479	2.25E-34	Artery	PRKACB
CRIP1	8.53E-39	0.236303	0.954	0.901	2.62E-34	Vein	CRIP1
COMP	1.12E-38	0.26236	0.18	0.064	3.45E-34	Vein	COMP
PAX8-AS1	1.37E-38	0.185881	0.138	0.04	4.21E-34	Vein	PAX8-AS1
CNN3	1.56E-38	0.467396	0.693	0.62	4.79E-34	Vein	CNN3
ANP32B	1.91E-38	0.43561	0.849	0.769	5.86E-34	Vein	ANP32B
ITGA11	2.09E-38	-0.27677	0.041	0.223	6.42E-34	Artery	ITGA11
APOD	2.17E-38	0.747703	0.274	0.127	6.67E-34	Vein	APOD
INSIG2	2.24E-38	-0.242547	0.152	0.375	6.89E-34	Artery	INSIG2
TLCD4	2.34E-38	-0.226854	0.079	0.28	7.20E-34	Artery	TLCD4
MT1X	2.57E-38	-0.967785	0.81	0.898	7.89E-34	Artery	MT1X
LMNA	2.92E-38	0.384448	0.943	0.935	8.97E-34	Vein	LMNA
PDE1B	2.98E-38	0.203388	0.213	0.085	9.15E-34	Vein	PDE1B
MFGE8	3.62E-38	0.411902	0.959	0.968	1.11E-33	Vein	MFGE8
TMEM181	4.04E-38	-0.379518	0.315	0.553	1.24E-33	Artery	TMEM181
ANXA6	4.49E-38	0.402639	0.759	0.704	1.38E-33	Vein	ANXA6
TP53I3	6.80E-38	0.20231	0.192	0.073	2.09E-33	Vein	TP53I3
AK1	9.28E-38	0.409651	0.603	0.467	2.85E-33	Vein	AK1
DCN	1.18E-37	0.580346	0.522	0.348	3.62E-33	Vein	DCN
CALCRL	1.30E-37	-0.287674	0.242	0.482	3.99E-33	Artery	CALCRL
MXD4	1.38E-37	0.400064	0.604	0.482	4.25E-33	Vein	MXD4
PARP8	1.64E-37	-0.194064	0.038	0.214	5.05E-33	Artery	PARP8
HADHA	1.75E-37	0.4031	0.718	0.645	5.37E-33	Vein	HADHA
COMMD6	1.94E-37	-0.375113	0.818	0.853	5.95E-33	Artery	COMMD6
MSC-AS1	2.06E-37	-0.266663	0.127	0.34	6.33E-33	Artery	MSC-AS1
IL11RA	2.17E-37	-0.175721	0.062	0.254	6.67E-33	Artery	IL11RA
JUNB	2.48E-37	-0.415188	0.966	0.992	7.62E-33	Artery	JUNB
GAREM1	2.54E-37	-0.276881	0.098	0.294	7.82E-33	Artery	GAREM1
NAP1L3	2.57E-37	-0.213001	0.063	0.251	7.89E-33	Artery	NAP1L3
ARHGEF9	2.61E-37	-0.321094	0.308	0.54	8.03E-33	Artery	ARHGEF9
CDH11	3.10E-37	-0.20462	0.046	0.228	9.54E-33	Artery	CDH11
AGAP2-AS1	3.22E-37	0.150019	0.139	0.042	9.91E-33	Vein	AGAP2-AS1
CCDC90B	3.50E-37	-0.27735	0.249	0.482	1.08E-32	Artery	CCDC90B
PARVA	3.81E-37	-0.341309	0.497	0.712	1.17E-32	Artery	PARVA
AC100830.1	4.76E-37	0.255989	0.196	0.076	1.46E-32	Vein	AC100830.1
ST5	4.77E-37	0.374142	0.484	0.325	1.47E-32	Vein	ST5
KIAA1671	4.80E-37	-0.27876	0.213	0.44	1.47E-32	Artery	KIAA1671
KHDRBS3	5.32E-37	-0.267762	0.169	0.386	1.64E-32	Artery	KHDRBS3
IPO7	6.28E-37	-0.332178	0.468	0.684	1.93E-32	Artery	IPO7
LHFPL2	6.64E-37	-0.200961	0.039	0.213	2.04E-32	Artery	LHFPL2
EPOR	7.06E-37	0.149301	0.12	0.033	2.17E-32	Vein	EPOR
GBE1	8.02E-37	-0.292558	0.225	0.447	2.47E-32	Artery	GBE1
TMEM106C	8.87E-37	-0.229957	0.215	0.44	2.73E-32	Artery	TMEM106C
ITPR1	9.48E-37	-0.376791	0.464	0.694	2.91E-32	Artery	ITPR1
NIBAN2	1.05E-36	-0.223379	0.141	0.356	3.22E-32	Artery	NIBAN2
GALNT17	1.08E-36	-0.181251	0.024	0.19	3.33E-32	Artery	GALNT17
VPS29	1.10E-36	-0.347583	0.592	0.743	3.37E-32	Artery	VPS29
UBXN1	1.10E-36	0.371311	0.8	0.744	3.38E-32	Vein	UBXN1
COL15A1	1.12E-36	-0.235492	0.117	0.324	3.45E-32	Artery	COL15A1
PICALM	1.13E-36	0.423818	0.706	0.61	3.48E-32	Vein	PICALM
ARHGAP44	1.20E-36	0.155626	0.142	0.044	3.69E-32	Vein	ARHGAP44
HS3ST2	1.20E-36	0.113354	0.087	0.018	3.70E-32	Vein	HS3ST2
LSMEM1	1.22E-36	-0.316003	0.077	0.264	3.73E-32	Artery	LSMEM1
PDLIM4	1.25E-36	-0.20092	0.091	0.29	3.84E-32	Artery	PDLIM4
SPRYD3	1.26E-36	-0.264977	0.25	0.485	3.88E-32	Artery	SPRYD3
EN1	1.33E-36	0.104424	0.09	0.019	4.08E-32	Vein	EN1
SLC8B1	1.53E-36	0.262491	0.258	0.119	4.69E-32	Vein	SLC8B1
EEF1G	1.84E-36	0.381993	0.945	0.92	5.67E-32	Vein	EEF1G
PDLIM7	2.05E-36	-0.382429	0.763	0.87	6.29E-32	Artery	PDLIM7
GALNT2	2.20E-36	-0.246423	0.167	0.381	6.76E-32	Artery	GALNT2
ETS1	2.22E-36	0.483385	0.461	0.314	6.84E-32	Vein	ETS1
ACTR2	2.44E-36	-0.335113	0.627	0.799	7.51E-32	Artery	ACTR2
PLEKHH3	2.49E-36	0.433896	0.453	0.309	7.67E-32	Vein	PLEKHH3
SERTAD4-AS1	2.52E-36	-0.224373	0.108	0.31	7.73E-32	Artery	SERTAD4-AS1
RPS21	3.62E-36	-0.275781	0.958	0.964	1.11E-31	Artery	RPS21
SEC14L1	4.14E-36	0.258284	0.278	0.134	1.27E-31	Vein	SEC14L1
EVL	4.42E-36	0.255769	0.242	0.109	1.36E-31	Vein	EVL
MIB1	4.44E-36	-0.290091	0.283	0.511	1.37E-31	Artery	MIB1
PMAIP1	4.62E-36	0.121933	0.068	0.011	1.42E-31	Vein	PMAIP1
PLXNB1	4.68E-36	-0.281645	0.201	0.428	1.44E-31	Artery	PLXNB1
ARPC1B	5.27E-36	0.50781	0.599	0.49	1.62E-31	Vein	ARPC1B
AEBP1	5.34E-36	-0.350091	0.648	0.858	1.64E-31	Artery	AEBP1
STXBP5	5.60E-36	-0.250484	0.064	0.245	1.72E-31	Artery	STXBP5
EGR1	5.78E-36	-0.836112	0.767	0.878	1.78E-31	Artery	EGR1
IGFBP5	6.22E-36	0.641281	0.954	0.957	1.91E-31	Vein	IGFBP5
MYL12A	6.78E-36	-0.383429	0.874	0.893	2.08E-31	Artery	MYL12A
REEP3	6.92E-36	-0.308847	0.531	0.738	2.13E-31	Artery	REEP3
DIP2C	7.11E-36	-0.259592	0.186	0.411	2.19E-31	Artery	DIP2C
ITIH3	7.32E-36	-0.279642	0.291	0.543	2.25E-31	Artery	ITIH3
PBX1	7.71E-36	-0.328612	0.466	0.682	2.37E-31	Artery	PBX1
S100A3	8.17E-36	0.168977	0.155	0.052	2.51E-31	Vein	S100A3
CNKSR3	1.08E-35	-0.230248	0.027	0.192	3.32E-31	Artery	CNKSR3
FAM122A	1.21E-35	0.324255	0.37	0.22	3.71E-31	Vein	FAM122A
PPP1R3B	1.33E-35	-0.320254	0.236	0.459	4.10E-31	Artery	PPP1R3B
TGFB1I1	1.61E-35	0.368743	0.875	0.824	4.96E-31	Vein	TGFB1I1
RPS3	1.62E-35	0.389086	0.972	0.951	4.97E-31	Vein	RPS3
RBPMS-AS1	1.70E-35	-0.206918	0.028	0.192	5.22E-31	Artery	RBPMS-AS1
ADAMTS6	1.71E-35	-0.218618	0.011	0.162	5.25E-31	Artery	ADAMTS6
MACF1	1.71E-35	-0.4433	0.756	0.904	5.26E-31	Artery	MACF1
CAMTA1	1.77E-35	-0.380359	0.685	0.776	5.43E-31	Artery	CAMTA1
SERPINE1	2.05E-35	-0.517238	0.103	0.294	6.29E-31	Artery	SERPINE1
COL4A2	2.18E-35	-0.327863	0.853	0.958	6.70E-31	Artery	COL4A2
VAMP4	2.40E-35	-0.231716	0.137	0.345	7.36E-31	Artery	VAMP4
COX20	2.42E-35	-0.39238	0.656	0.785	7.44E-31	Artery	COX20
HSPG2	2.90E-35	-0.363332	0.723	0.875	8.92E-31	Artery	HSPG2
SLC9A3R1	2.99E-35	0.251271	0.287	0.144	9.18E-31	Vein	SLC9A3R1
INPP4B	3.02E-35	0.49265	0.493	0.346	9.28E-31	Vein	INPP4B
MIDN	3.12E-35	0.434445	0.686	0.554	9.59E-31	Vein	MIDN
TP53INP2	3.15E-35	0.204273	0.212	0.089	9.69E-31	Vein	TP53INP2
GP1BB	3.49E-35	0.225096	0.219	0.093	1.07E-30	Vein	GP1BB
TMED7	3.71E-35	-0.28801	0.37	0.601	1.14E-30	Artery	TMED7
AFAP1L2	4.11E-35	0.150751	0.154	0.052	1.26E-30	Vein	AFAP1L2
BHLHE41	4.26E-35	-0.265429	0.063	0.24	1.31E-30	Artery	BHLHE41
TMEM204	4.35E-35	0.25179	0.248	0.116	1.34E-30	Vein	TMEM204
FGFR1	4.88E-35	-0.354427	0.577	0.767	1.50E-30	Artery	FGFR1
PEAR1	5.08E-35	0.290325	0.292	0.148	1.56E-30	Vein	PEAR1
CAB39L	7.47E-35	-0.233551	0.196	0.422	2.30E-30	Artery	CAB39L
SLAIN2	8.18E-35	-0.299271	0.421	0.643	2.51E-30	Artery	SLAIN2
KCND3	8.22E-35	-0.182716	0.013	0.163	2.53E-30	Artery	KCND3
GOLGA4	9.31E-35	-0.39411	0.619	0.799	2.86E-30	Artery	GOLGA4
AC092164.1	9.98E-35	0.493489	0.434	0.296	3.07E-30	Vein	AC092164.1
ALDH6A1	1.01E-34	-0.231679	0.203	0.436	3.11E-30	Artery	ALDH6A1
NEDD9	1.13E-34	-0.387472	0.181	0.38	3.47E-30	Artery	NEDD9
CERS2	1.13E-34	-0.224074	0.218	0.445	3.48E-30	Artery	CERS2
CAMK2D	1.17E-34	-0.270592	0.236	0.463	3.60E-30	Artery	CAMK2D
TPM2	1.21E-34	-0.471965	0.994	1	3.71E-30	Artery	TPM2
SNX2	1.25E-34	-0.282519	0.383	0.589	3.84E-30	Artery	SNX2
ZNF532	1.33E-34	-0.279697	0.227	0.451	4.09E-30	Artery	ZNF532
C9orf16	1.34E-34	0.416134	0.705	0.624	4.13E-30	Vein	C9orf16
FYCO1	1.43E-34	-0.256207	0.205	0.427	4.38E-30	Artery	FYCO1
STMN1	1.44E-34	-0.213819	0.124	0.327	4.42E-30	Artery	STMN1
KCNJ3	1.46E-34	-0.174659	0.002	0.143	4.49E-30	Artery	KCNJ3
NDUFA3	1.47E-34	-0.331232	0.433	0.624	4.50E-30	Artery	NDUFA3
PCBP1	1.52E-34	-0.324474	0.735	0.852	4.66E-30	Artery	PCBP1
RAB4A	1.68E-34	-0.272575	0.342	0.567	5.17E-30	Artery	RAB4A
A4GALT	1.71E-34	0.349763	0.46	0.316	5.27E-30	Vein	A4GALT
ERBB4	1.89E-34	-0.197736	0.042	0.211	5.80E-30	Artery	ERBB4
BEX5	2.04E-34	-0.142084	0.006	0.151	6.28E-30	Artery	BEX5
SNHG7	2.05E-34	0.402136	0.502	0.367	6.31E-30	Vein	SNHG7
SUGCT	2.17E-34	-0.225416	0.037	0.199	6.67E-30	Artery	SUGCT
IGF2BP2	2.30E-34	0.15529	0.131	0.04	7.08E-30	Vein	IGF2BP2
APOC1	2.38E-34	0.167987	0.064	0.01	7.31E-30	Vein	APOC1
AC079313.2	2.45E-34	-0.203967	0.008	0.154	7.52E-30	Artery	AC079313.2
LRRC1	2.93E-34	-0.192058	0.022	0.176	9.01E-30	Artery	LRRC1
MAP4K4	3.04E-34	0.361542	0.537	0.389	9.34E-30	Vein	MAP4K4
DIXDC1	3.52E-34	-0.333868	0.468	0.679	1.08E-29	Artery	DIXDC1
PTRHD1	3.58E-34	0.241717	0.299	0.158	1.10E-29	Vein	PTRHD1
WNK1	3.72E-34	-0.312463	0.422	0.647	1.14E-29	Artery	WNK1
SLC7A8	3.99E-34	-0.253169	0.1	0.29	1.23E-29	Artery	SLC7A8
TTC3	4.41E-34	-0.343625	0.558	0.76	1.36E-29	Artery	TTC3
MYCBP2	5.60E-34	0.440021	0.728	0.648	1.72E-29	Vein	MYCBP2
PXMP2	5.92E-34	-0.205025	0.143	0.349	1.82E-29	Artery	PXMP2
APOBEC3C	6.27E-34	0.159656	0.151	0.052	1.93E-29	Vein	APOBEC3C
ZNF106	6.62E-34	-0.363392	0.43	0.646	2.04E-29	Artery	ZNF106
PPFIBP1	6.74E-34	-0.307126	0.33	0.555	2.07E-29	Artery	PPFIBP1
GAMT	6.75E-34	0.270081	0.312	0.173	2.07E-29	Vein	GAMT
JPH2	7.38E-34	-0.257983	0.297	0.532	2.27E-29	Artery	JPH2
CALU	8.39E-34	-0.307909	0.603	0.795	2.58E-29	Artery	CALU
MAP3K2	9.74E-34	-0.34607	0.386	0.605	2.99E-29	Artery	MAP3K2
ANTXR2	1.14E-33	-0.250483	0.167	0.374	3.49E-29	Artery	ANTXR2
SCX	1.27E-33	-0.171899	0.026	0.182	3.92E-29	Artery	SCX
ISG15	1.33E-33	0.552174	0.491	0.372	4.07E-29	Vein	ISG15
FZD4	1.41E-33	0.227118	0.244	0.113	4.32E-29	Vein	FZD4
IFRD1	1.64E-33	-0.450757	0.521	0.726	5.03E-29	Artery	IFRD1
IRF1	1.71E-33	0.416336	0.688	0.522	5.25E-29	Vein	IRF1
ARID3A	1.75E-33	0.114094	0.083	0.018	5.38E-29	Vein	ARID3A
MSRB3	2.04E-33	-0.308147	0.839	0.922	6.27E-29	Artery	MSRB3
PDE4B	2.27E-33	-0.249408	0.045	0.208	6.98E-29	Artery	PDE4B
CCR10	2.41E-33	0.155428	0.138	0.045	7.40E-29	Vein	CCR10
AC004556.3	2.47E-33	-0.139491	0.02	0.172	7.58E-29	Artery	AC004556.3
LMO7	2.58E-33	-0.189373	0.018	0.168	7.93E-29	Artery	LMO7
THY1	2.59E-33	0.159208	0.089	0.021	7.95E-29	Vein	THY1
STK17A	3.06E-33	-0.253443	0.221	0.438	9.40E-29	Artery	STK17A
COQ10A	3.19E-33	0.199405	0.183	0.072	9.79E-29	Vein	COQ10A
PDE10A	3.49E-33	0.132084	0.087	0.02	1.07E-28	Vein	PDE10A
SLIT3	3.75E-33	0.407224	0.727	0.647	1.15E-28	Vein	SLIT3
SSR2	4.05E-33	0.378781	0.719	0.646	1.25E-28	Vein	SSR2
LGALS1	5.46E-33	0.538856	0.977	0.961	1.68E-28	Vein	LGALS1
ERGIC3	5.66E-33	0.381267	0.512	0.384	1.74E-28	Vein	ERGIC3
TWSG1	5.99E-33	-0.303825	0.473	0.676	1.84E-28	Artery	TWSG1
STX7	7.32E-33	-0.259604	0.275	0.507	2.25E-28	Artery	STX7
TMEM51-AS1	7.41E-33	0.107848	0.064	0.011	2.28E-28	Vein	TMEM51-AS1
APCDD1	7.63E-33	0.215024	0.168	0.064	2.34E-28	Vein	APCDD1
MDFIC	8.04E-33	-0.152593	0.066	0.242	2.47E-28	Artery	MDFIC
LMO3	8.43E-33	-0.171645	0.02	0.17	2.59E-28	Artery	LMO3
PLEKHG3	8.84E-33	0.463126	0.554	0.429	2.72E-28	Vein	PLEKHG3
KDM5D	9.01E-33	-0.259801	0.039	0.198	2.77E-28	Artery	KDM5D
ACTA2-AS1	9.01E-33	-0.229884	0.058	0.225	2.77E-28	Artery	ACTA2-AS1
C5orf24	9.50E-33	-0.307333	0.532	0.723	2.92E-28	Artery	C5orf24
ENPP1	9.56E-33	-0.191524	0.03	0.185	2.94E-28	Artery	ENPP1
FGL2	1.00E-32	-0.248279	0.027	0.179	3.08E-28	Artery	FGL2
PDXK	1.05E-32	-0.238218	0.159	0.362	3.23E-28	Artery	PDXK
JUN	1.06E-32	-0.535341	0.963	0.983	3.24E-28	Artery	JUN
PTCHD1	1.06E-32	-0.212719	0.033	0.189	3.25E-28	Artery	PTCHD1
GDF11	1.06E-32	0.115832	0.132	0.042	3.26E-28	Vein	GDF11
ADCY6	1.33E-32	0.297906	0.381	0.23	4.08E-28	Vein	ADCY6
DNAJB6	1.43E-32	-0.337182	0.623	0.809	4.38E-28	Artery	DNAJB6
HEXIM1	1.48E-32	-0.297404	0.319	0.539	4.56E-28	Artery	HEXIM1
EID1	1.61E-32	-0.301322	0.901	0.906	4.95E-28	Artery	EID1
SHISA4	2.23E-32	-0.228154	0.222	0.435	6.87E-28	Artery	SHISA4
FMNL2	2.56E-32	-0.198348	0.066	0.239	7.88E-28	Artery	FMNL2
HRCT1	2.62E-32	-0.320955	0.184	0.383	8.05E-28	Artery	HRCT1
FMO2	2.97E-32	-0.444364	0.248	0.449	9.14E-28	Artery	FMO2
RPL5	3.40E-32	0.341553	0.979	0.965	1.05E-27	Vein	RPL5
VIM	3.61E-32	-0.467339	1	1	1.11E-27	Artery	VIM
MYO1D	3.74E-32	-0.335538	0.433	0.646	1.15E-27	Artery	MYO1D
2024-03-06	3.77E-32	-0.308336	0.405	0.624	1.16E-27	Artery	2024-03-06
SLC25A34-AS1	4.42E-32	-0.15687	0.004	0.139	1.36E-27	Artery	SLC25A34-AS1
GCHFR	4.45E-32	-0.154021	0.009	0.147	1.37E-27	Artery	GCHFR
UBL5	5.86E-32	-0.327747	0.831	0.837	1.80E-27	Artery	UBL5
AC037198.1	6.02E-32	0.25051	0.177	0.069	1.85E-27	Vein	AC037198.1
EIF3H	6.67E-32	0.363015	0.824	0.746	2.05E-27	Vein	EIF3H
FABP3	7.10E-32	-0.187956	0.174	0.387	2.18E-27	Artery	FABP3
COX6A1	7.45E-32	0.317789	0.878	0.831	2.29E-27	Vein	COX6A1
NAV2	7.94E-32	-0.300016	0.262	0.479	2.44E-27	Artery	NAV2
VEGFB	8.18E-32	-0.313913	0.571	0.738	2.51E-27	Artery	VEGFB
TMA7	1.19E-31	-0.307431	0.831	0.844	3.65E-27	Artery	TMA7
NDUFS2	1.24E-31	0.37432	0.571	0.476	3.80E-27	Vein	NDUFS2
MYOCD	1.25E-31	-0.398515	0.452	0.652	3.83E-27	Artery	MYOCD
MAPRE2	1.44E-31	0.406477	0.603	0.516	4.44E-27	Vein	MAPRE2
LDHB	1.48E-31	0.365685	0.784	0.7	4.56E-27	Vein	LDHB
EPDR1	1.67E-31	-0.213017	0.134	0.323	5.12E-27	Artery	EPDR1
ACADVL	1.92E-31	0.408421	0.608	0.522	5.91E-27	Vein	ACADVL
AC119673.2	1.96E-31	-0.176558	0	0.128	6.02E-27	Artery	AC119673.2
DOCK5	2.73E-31	-0.230547	0.085	0.26	8.40E-27	Artery	DOCK5
CNR1	2.76E-31	-0.359137	0.061	0.221	8.47E-27	Artery	CNR1
IRF2BPL	2.98E-31	0.398561	0.55	0.427	9.16E-27	Vein	IRF2BPL
PGM5	3.44E-31	-0.318128	0.491	0.699	1.06E-26	Artery	PGM5
FAM53B	3.68E-31	0.149727	0.117	0.035	1.13E-26	Vein	FAM53B
POLD4	4.15E-31	0.381418	0.687	0.62	1.28E-26	Vein	POLD4
PML	4.15E-31	0.234303	0.281	0.147	1.28E-26	Vein	PML
CDK18	4.20E-31	0.310882	0.339	0.2	1.29E-26	Vein	CDK18
BRI3	4.32E-31	-0.314136	0.756	0.827	1.33E-26	Artery	BRI3
TMX4	6.06E-31	-0.257643	0.312	0.524	1.86E-26	Artery	TMX4
ANKRD37	6.43E-31	-0.342541	0.305	0.522	1.98E-26	Artery	ANKRD37
GSTT2B	6.82E-31	0.232415	0.263	0.136	2.10E-26	Vein	GSTT2B
EPAS1	7.74E-31	-0.451702	0.865	0.933	2.38E-26	Artery	EPAS1
DNAJC19	8.67E-31	-0.256517	0.414	0.625	2.66E-26	Artery	DNAJC19
HIGD2A	8.91E-31	0.361964	0.583	0.474	2.74E-26	Vein	HIGD2A
TMCO3	9.13E-31	-0.244018	0.302	0.526	2.81E-26	Artery	TMCO3
AL390755.1	9.26E-31	0.143919	0.14	0.049	2.85E-26	Vein	AL390755.1
IER3	1.10E-30	1.165	0.644	0.56	3.38E-26	Vein	IER3
FHOD3	1.23E-30	-0.199127	0.06	0.224	3.77E-26	Artery	FHOD3
RGN	1.24E-30	-0.184948	0.1	0.28	3.81E-26	Artery	RGN
GNG10	1.26E-30	-0.266855	0.458	0.663	3.88E-26	Artery	GNG10
MEGF6	1.27E-30	-0.165769	0.006	0.137	3.89E-26	Artery	MEGF6
SLC25A4	2.04E-30	-0.318513	0.637	0.789	6.28E-26	Artery	SLC25A4
CLTCL1	2.64E-30	0.167063	0.132	0.045	8.13E-26	Vein	CLTCL1
DPY19L2	2.69E-30	-0.254841	0.093	0.268	8.28E-26	Artery	DPY19L2
KIAA0895L	2.86E-30	0.183766	0.146	0.052	8.79E-26	Vein	KIAA0895L
TPI1	3.07E-30	0.410709	0.77	0.739	9.42E-26	Vein	TPI1
LINC00632	3.42E-30	-0.288566	0.246	0.454	1.05E-25	Artery	LINC00632
SATB2	3.99E-30	0.126565	0.103	0.029	1.23E-25	Vein	SATB2
LINC01252	4.36E-30	-0.186914	0.008	0.138	1.34E-25	Artery	LINC01252
TMOD1	5.37E-30	-0.262488	0.342	0.555	1.65E-25	Artery	TMOD1
CISH	5.49E-30	0.121667	0.095	0.025	1.69E-25	Vein	CISH
TMEM30B	6.14E-30	-0.177448	0.055	0.213	1.89E-25	Artery	TMEM30B
MMP28	6.92E-30	-0.138258	0.008	0.137	2.13E-25	Artery	MMP28
DNPH1	8.56E-30	0.203197	0.239	0.117	2.63E-25	Vein	DNPH1
MAN1A1	8.56E-30	-0.25142	0.172	0.361	2.63E-25	Artery	MAN1A1
AC113383.1	9.29E-30	-0.178978	0.052	0.205	2.86E-25	Artery	AC113383.1
RUNX1	1.03E-29	0.193869	0.166	0.065	3.17E-25	Vein	RUNX1
GALNT1	1.22E-29	-0.232186	0.191	0.387	3.75E-25	Artery	GALNT1
ATAD2	1.25E-29	-0.203475	0.085	0.255	3.83E-25	Artery	ATAD2
FGD5-AS1	1.35E-29	-0.255136	0.477	0.687	4.14E-25	Artery	FGD5-AS1
CREG1	1.41E-29	-0.233767	0.286	0.497	4.34E-25	Artery	CREG1
NUMBL	1.61E-29	-0.175008	0.076	0.242	4.96E-25	Artery	NUMBL
TOB1	1.70E-29	0.482928	0.826	0.802	5.23E-25	Vein	TOB1
SPHK1	1.84E-29	0.117849	0.113	0.034	5.64E-25	Vein	SPHK1
ESF1	1.89E-29	-0.229639	0.298	0.511	5.80E-25	Artery	ESF1
SACS	1.99E-29	-0.286704	0.229	0.432	6.11E-25	Artery	SACS
TLE4	2.38E-29	-0.326921	0.35	0.564	7.32E-25	Artery	TLE4
SARAF	2.40E-29	-0.272575	0.581	0.756	7.39E-25	Artery	SARAF
NRP1	2.68E-29	0.341823	0.425	0.289	8.25E-25	Vein	NRP1
CCDC146	2.78E-29	-0.161992	0.026	0.166	8.54E-25	Artery	CCDC146
MAP3K5	3.09E-29	-0.248651	0.16	0.346	9.51E-25	Artery	MAP3K5
ABHD5	3.39E-29	-0.336989	0.208	0.395	1.04E-24	Artery	ABHD5
CSRNP3	3.55E-29	0.135887	0.119	0.038	1.09E-24	Vein	CSRNP3
BICC1	3.77E-29	-0.149526	0.014	0.144	1.16E-24	Artery	BICC1
PRR34-AS1	4.38E-29	-0.230723	0.229	0.429	1.35E-24	Artery	PRR34-AS1
ZFAND3	4.75E-29	-0.222489	0.267	0.475	1.46E-24	Artery	ZFAND3
CARMIL1	4.78E-29	-0.238233	0.174	0.374	1.47E-24	Artery	CARMIL1
TLN2	5.21E-29	-0.213498	0.072	0.231	1.60E-24	Artery	TLN2
FGFR2	5.76E-29	-0.142894	0.003	0.124	1.77E-24	Artery	FGFR2
Z95114.4	6.85E-29	-0.168566	0.017	0.149	2.10E-24	Artery	Z95114.4
RAB11FIP2	7.16E-29	-0.23028	0.191	0.383	2.20E-24	Artery	RAB11FIP2
SEC61G	7.17E-29	-0.30503	0.64	0.742	2.20E-24	Artery	SEC61G
HEBP1	7.69E-29	-0.204514	0.295	0.504	2.36E-24	Artery	HEBP1
PPM1B	7.97E-29	-0.27044	0.313	0.516	2.45E-24	Artery	PPM1B
ELOVL5	8.21E-29	0.300391	0.479	0.349	2.52E-24	Vein	ELOVL5
AC022034.1	8.89E-29	-0.191178	0.119	0.298	2.73E-24	Artery	AC022034.1
PFKP	9.03E-29	-0.193394	0.244	0.45	2.77E-24	Artery	PFKP
KAT2B	1.01E-28	-0.182686	0.09	0.259	3.10E-24	Artery	KAT2B
ZFP36L2	1.04E-28	-0.363069	0.588	0.781	3.19E-24	Artery	ZFP36L2
PODXL2	1.06E-28	0.106055	0.116	0.037	3.26E-24	Vein	PODXL2
SUSD5	1.15E-28	-0.358079	0.651	0.789	3.55E-24	Artery	SUSD5
LGR4	1.18E-28	-0.166631	0.027	0.164	3.61E-24	Artery	LGR4
LAMP1	1.25E-28	-0.270916	0.576	0.741	3.85E-24	Artery	LAMP1
GATA6	1.25E-28	-0.154691	0.024	0.161	3.86E-24	Artery	GATA6
PPARGC1B	1.30E-28	0.101982	0.066	0.013	3.99E-24	Vein	PPARGC1B
AC024901.1	1.30E-28	-0.158338	0.001	0.119	4.00E-24	Artery	AC024901.1
VAT1L	1.41E-28	-0.153059	0.003	0.123	4.32E-24	Artery	VAT1L
LY6K	1.46E-28	0.166872	0.142	0.052	4.50E-24	Vein	LY6K
RAB3A	1.47E-28	0.131313	0.111	0.035	4.51E-24	Vein	RAB3A
GPD1L	1.73E-28	-0.166541	0.114	0.293	5.31E-24	Artery	GPD1L
CYC1	1.75E-28	0.353402	0.596	0.511	5.37E-24	Vein	CYC1
ATP6AP1L	1.94E-28	-0.136767	0.027	0.164	5.97E-24	Artery	ATP6AP1L
STK40	2.01E-28	-0.203716	0.166	0.352	6.16E-24	Artery	STK40
BATF3	2.52E-28	0.148549	0.143	0.053	7.74E-24	Vein	BATF3
MPC1	2.62E-28	-0.265547	0.417	0.606	8.06E-24	Artery	MPC1
ARHGAP5	2.76E-28	-0.282425	0.495	0.693	8.47E-24	Artery	ARHGAP5
PPP1R9A	2.83E-28	-0.194292	0.083	0.249	8.71E-24	Artery	PPP1R9A
HEPH	3.19E-28	-0.192044	0.11	0.285	9.82E-24	Artery	HEPH
SYTL2	3.89E-28	0.333593	0.496	0.352	1.19E-23	Vein	SYTL2
MBNL2	4.04E-28	-0.301627	0.512	0.695	1.24E-23	Artery	MBNL2
PPFIBP2	4.17E-28	0.13389	0.124	0.042	1.28E-23	Vein	PPFIBP2
BRD7	4.61E-28	-0.289074	0.49	0.688	1.42E-23	Artery	BRD7
IGBP1	5.11E-28	0.361382	0.644	0.55	1.57E-23	Vein	IGBP1
LRRC4B	5.18E-28	0.200039	0.179	0.077	1.59E-23	Vein	LRRC4B
ATP8B2	5.22E-28	-0.218399	0.204	0.397	1.60E-23	Artery	ATP8B2
COX7A1	5.46E-28	-0.379017	0.72	0.772	1.68E-23	Artery	COX7A1
CTBS	5.77E-28	-0.20799	0.185	0.373	1.77E-23	Artery	CTBS
C1orf198	7.24E-28	-0.245431	0.321	0.529	2.23E-23	Artery	C1orf198
PDGFC	7.92E-28	-0.202841	0.156	0.34	2.44E-23	Artery	PDGFC
RBP1	8.29E-28	-0.155303	0.026	0.159	2.55E-23	Artery	RBP1
SAMD12	8.49E-28	-0.12629	0.02	0.15	2.61E-23	Artery	SAMD12
ZNHIT1	8.98E-28	0.350604	0.628	0.536	2.76E-23	Vein	ZNHIT1
RASL11A	9.12E-28	0.376574	0.421	0.295	2.80E-23	Vein	RASL11A
COL6A2	9.66E-28	0.390023	0.968	0.97	2.97E-23	Vein	COL6A2
DPP7	9.75E-28	0.19995	0.226	0.11	3.00E-23	Vein	DPP7
SAV1	9.78E-28	-0.305428	0.417	0.608	3.00E-23	Artery	SAV1
FOSB	1.06E-27	-0.510359	0.697	0.846	3.25E-23	Artery	FOSB
KCTD15	1.07E-27	-0.135497	0.04	0.182	3.30E-23	Artery	KCTD15
NUPR1	1.09E-27	0.367516	0.882	0.817	3.36E-23	Vein	NUPR1
MZT1	1.11E-27	-0.177679	0.147	0.328	3.43E-23	Artery	MZT1
CYSTM1	1.25E-27	0.336538	0.692	0.624	3.83E-23	Vein	CYSTM1
GOLGA3	1.34E-27	-0.232595	0.244	0.442	4.11E-23	Artery	GOLGA3
SNHG14	1.39E-27	-0.365327	0.377	0.593	4.26E-23	Artery	SNHG14
NDUFB3	1.42E-27	-0.225363	0.403	0.599	4.36E-23	Artery	NDUFB3
WFDC2	1.51E-27	0.171138	0.141	0.052	4.63E-23	Vein	WFDC2
ATP6V1G1	1.68E-27	0.313458	0.779	0.714	5.16E-23	Vein	ATP6V1G1
C1R	1.77E-27	-0.372864	0.623	0.783	5.43E-23	Artery	C1R
HLA-C	2.01E-27	0.393707	0.874	0.816	6.17E-23	Vein	HLA-C
DKK3	2.22E-27	-0.460924	0.531	0.649	6.82E-23	Artery	DKK3
HOXB-AS1	2.51E-27	0.157948	0.172	0.073	7.71E-23	Vein	HOXB-AS1
ATXN1	2.52E-27	-0.268606	0.289	0.493	7.76E-23	Artery	ATXN1
SLC1A4	3.35E-27	-0.151274	0.062	0.214	1.03E-22	Artery	SLC1A4
THBS2	3.44E-27	-0.149624	0.077	0.234	1.06E-22	Artery	THBS2
AC093390.1	3.48E-27	-0.177201	0.088	0.252	1.07E-22	Artery	AC093390.1
MTPN	3.49E-27	-0.266058	0.549	0.74	1.07E-22	Artery	MTPN
FILIP1	4.03E-27	-0.342675	0.668	0.825	1.24E-22	Artery	FILIP1
KMT5A	4.23E-27	-0.22489	0.342	0.542	1.30E-22	Artery	KMT5A
ATP5F1A	4.91E-27	0.322315	0.727	0.685	1.51E-22	Vein	ATP5F1A
COX16	5.15E-27	-0.180367	0.208	0.405	1.58E-22	Artery	COX16
INSR	5.23E-27	-0.233288	0.297	0.509	1.61E-22	Artery	INSR
RPL27A	5.31E-27	-0.239564	0.958	0.969	1.63E-22	Artery	RPL27A
MAP1A	5.48E-27	0.324263	0.411	0.282	1.68E-22	Vein	MAP1A
CDKN1C	5.84E-27	0.490623	0.54	0.429	1.79E-22	Vein	CDKN1C
RIMKLB	5.94E-27	-0.267476	0.284	0.489	1.83E-22	Artery	RIMKLB
KCNAB1	5.96E-27	0.403018	0.844	0.841	1.83E-22	Vein	KCNAB1
FLYWCH2	6.35E-27	0.232281	0.289	0.167	1.95E-22	Vein	FLYWCH2
RASSF4	6.70E-27	0.225326	0.234	0.117	2.06E-22	Vein	RASSF4
SLC16A4	6.98E-27	-0.131103	0.028	0.16	2.15E-22	Artery	SLC16A4
SLC9A3R2	7.03E-27	-0.166326	0.234	0.43	2.16E-22	Artery	SLC9A3R2
ZYX	7.10E-27	0.340356	0.751	0.698	2.18E-22	Vein	ZYX
TGOLN2	7.30E-27	-0.283501	0.54	0.726	2.24E-22	Artery	TGOLN2
AC025259.3	7.34E-27	-0.26143	0.056	0.198	2.25E-22	Artery	AC025259.3
TNXB	7.56E-27	-0.192608	0.057	0.202	2.32E-22	Artery	TNXB
USP53	7.62E-27	-0.283365	0.278	0.469	2.34E-22	Artery	USP53
MEF2D	7.79E-27	0.441025	0.701	0.634	2.39E-22	Vein	MEF2D
MAP2K3	8.03E-27	-0.275243	0.205	0.387	2.47E-22	Artery	MAP2K3
FGF7	8.51E-27	0.27147	0.177	0.075	2.62E-22	Vein	FGF7
RFTN1	9.93E-27	-0.137928	0.041	0.177	3.05E-22	Artery	RFTN1
PDZRN3	1.01E-26	-0.225025	0.272	0.488	3.09E-22	Artery	PDZRN3
MYOM1	1.02E-26	0.360218	0.592	0.477	3.14E-22	Vein	MYOM1
SEMA4C	1.04E-26	0.247258	0.299	0.173	3.18E-22	Vein	SEMA4C
PABPC4	1.05E-26	0.380801	0.594	0.498	3.22E-22	Vein	PABPC4
ANO5	1.09E-26	-0.125475	0	0.109	3.35E-22	Artery	ANO5
LASP1	1.10E-26	0.350219	0.514	0.397	3.38E-22	Vein	LASP1
AC005921.2	1.11E-26	-0.156095	0.09	0.25	3.40E-22	Artery	AC005921.2
GAS5	1.13E-26	0.45319	0.772	0.735	3.47E-22	Vein	GAS5
C17orf82	1.15E-26	0.110886	0.108	0.034	3.54E-22	Vein	C17orf82
FDFT1	1.41E-26	0.328617	0.486	0.368	4.35E-22	Vein	FDFT1
RAB32	1.53E-26	-0.211571	0.263	0.458	4.70E-22	Artery	RAB32
TPD52	1.55E-26	-0.124005	0.028	0.159	4.77E-22	Artery	TPD52
LAMB2	1.67E-26	0.37413	0.648	0.566	5.13E-22	Vein	LAMB2
SLC7A1	1.73E-26	-0.15752	0.045	0.183	5.32E-22	Artery	SLC7A1
SLC25A25	1.78E-26	0.259263	0.376	0.238	5.47E-22	Vein	SLC25A25
GRIN2A	2.13E-26	0.102636	0.079	0.02	6.56E-22	Vein	GRIN2A
FADS3	2.14E-26	0.385969	0.723	0.667	6.57E-22	Vein	FADS3
NCKAP1L	2.49E-26	-0.205748	0.016	0.136	7.65E-22	Artery	NCKAP1L
B3GALNT1	2.73E-26	0.122183	0.122	0.042	8.40E-22	Vein	B3GALNT1
ROBO3	2.99E-26	0.110742	0.097	0.029	9.18E-22	Vein	ROBO3
SMARCB1	3.18E-26	0.280684	0.359	0.236	9.77E-22	Vein	SMARCB1
ATP5MC3	3.21E-26	0.317118	0.77	0.729	9.88E-22	Vein	ATP5MC3
RAB29	3.53E-26	-0.180374	0.098	0.257	1.09E-21	Artery	RAB29
LOX	3.80E-26	-0.151534	0.021	0.145	1.17E-21	Artery	LOX
GMPR	5.48E-26	-0.141729	0.077	0.231	1.68E-21	Artery	GMPR
MAGI1	5.74E-26	-0.19208	0.104	0.265	1.76E-21	Artery	MAGI1
TCEAL1	6.13E-26	-0.281816	0.356	0.545	1.88E-21	Artery	TCEAL1
RNF141	6.49E-26	-0.176768	0.145	0.32	1.99E-21	Artery	RNF141
ODC1	7.78E-26	-0.212916	0.412	0.614	2.39E-21	Artery	ODC1
CRLF1	8.33E-26	-0.462261	0.179	0.349	2.56E-21	Artery	CRLF1
RHOU	8.62E-26	-0.194098	0.117	0.279	2.65E-21	Artery	RHOU
TRABD2B	8.97E-26	-0.1553	0.176	0.366	2.76E-21	Artery	TRABD2B
IER2	9.75E-26	-0.401382	0.896	0.959	3.00E-21	Artery	IER2
USP54	1.03E-25	-0.206518	0.069	0.214	3.17E-21	Artery	USP54
HACD1	1.03E-25	-0.248073	0.446	0.635	3.17E-21	Artery	HACD1
MOCS1	1.10E-25	0.216482	0.254	0.137	3.37E-21	Vein	MOCS1
ANKDD1A	1.29E-25	-0.157517	0.117	0.287	3.97E-21	Artery	ANKDD1A
LARP6	1.60E-25	-0.171487	0.239	0.427	4.92E-21	Artery	LARP6
SMAD2	1.73E-25	-0.196946	0.236	0.428	5.30E-21	Artery	SMAD2
TMEM35A	1.91E-25	-0.139898	0.06	0.202	5.88E-21	Artery	TMEM35A
SNCAIP	1.95E-25	-0.137694	0.04	0.174	5.99E-21	Artery	SNCAIP
SNRPD2	1.97E-25	0.35192	0.743	0.667	6.05E-21	Vein	SNRPD2
ADAM9	2.15E-25	-0.223525	0.275	0.466	6.62E-21	Artery	ADAM9
KPNA3	2.37E-25	-0.196861	0.221	0.406	7.30E-21	Artery	KPNA3
IL13RA1	2.45E-25	-0.206299	0.242	0.427	7.52E-21	Artery	IL13RA1
NMD3	2.45E-25	0.348457	0.487	0.387	7.53E-21	Vein	NMD3
DNMBP	2.70E-25	0.137777	0.129	0.048	8.29E-21	Vein	DNMBP
GYG1	2.74E-25	-0.197407	0.307	0.499	8.41E-21	Artery	GYG1
SPEG	2.81E-25	-0.241799	0.652	0.837	8.62E-21	Artery	SPEG
AP002026.1	2.93E-25	-0.163608	0.016	0.133	9.02E-21	Artery	AP002026.1
RCN2	3.12E-25	-0.22792	0.436	0.623	9.60E-21	Artery	RCN2
NEDD4	3.14E-25	-0.202166	0.146	0.316	9.65E-21	Artery	NEDD4
GABARAPL2	3.29E-25	-0.276573	0.601	0.749	1.01E-20	Artery	GABARAPL2
LGALS3BP	3.41E-25	0.306365	0.421	0.3	1.05E-20	Vein	LGALS3BP
ACAN	3.70E-25	-0.375142	0.126	0.28	1.14E-20	Artery	ACAN
ANKRD35	3.87E-25	-0.127239	0.041	0.172	1.19E-20	Artery	ANKRD35
TMEM106B	3.91E-25	-0.221062	0.324	0.524	1.20E-20	Artery	TMEM106B
SMAP2	4.38E-25	0.242793	0.339	0.211	1.35E-20	Vein	SMAP2
MYC	4.46E-25	0.274333	0.547	0.387	1.37E-20	Vein	MYC
TCIM	4.71E-25	0.337522	0.155	0.064	1.45E-20	Vein	TCIM
HINT3	4.97E-25	-0.164564	0.138	0.308	1.53E-20	Artery	HINT3
CMSS1	5.20E-25	-0.190516	0.163	0.34	1.60E-20	Artery	CMSS1
SPIN1	5.32E-25	-0.208204	0.306	0.505	1.64E-20	Artery	SPIN1
HIVEP3	5.40E-25	0.110574	0.094	0.028	1.66E-20	Vein	HIVEP3
TRHDE	6.45E-25	-0.138624	0	0.102	1.98E-20	Artery	TRHDE
PEBP4	6.45E-25	-0.1303	0.027	0.151	1.98E-20	Artery	PEBP4
LIN7C	6.55E-25	-0.209233	0.261	0.455	2.01E-20	Artery	LIN7C
MYL6	6.71E-25	-0.326474	0.989	0.994	2.06E-20	Artery	MYL6
GDF7	6.77E-25	-0.14444	0.001	0.104	2.08E-20	Artery	GDF7
FAM27C	8.76E-25	0.247696	0.248	0.136	2.69E-20	Vein	FAM27C
LRRFIP1	8.78E-25	-0.286036	0.792	0.905	2.70E-20	Artery	LRRFIP1
RHOC	8.92E-25	0.338512	0.807	0.735	2.74E-20	Vein	RHOC
PIP5K1C	8.98E-25	-0.181598	0.161	0.336	2.76E-20	Artery	PIP5K1C
NPTX2	9.74E-25	-0.119714	0.001	0.103	2.99E-20	Artery	NPTX2
ANKRD6	9.80E-25	-0.161897	0.057	0.194	3.01E-20	Artery	ANKRD6
KCTD10	1.05E-24	-0.241736	0.391	0.581	3.22E-20	Artery	KCTD10
TECR	1.31E-24	0.286343	0.534	0.425	4.03E-20	Vein	TECR
LAYN	1.31E-24	-0.156206	0.084	0.232	4.03E-20	Artery	LAYN
FLNC	1.44E-24	-0.315794	0.233	0.406	4.41E-20	Artery	FLNC
CARHSP1	1.56E-24	0.332744	0.503	0.39	4.81E-20	Vein	CARHSP1
CCN1	1.65E-24	-0.624662	0.672	0.785	5.06E-20	Artery	CCN1
NBEA	1.71E-24	-0.16088	0.058	0.198	5.27E-20	Artery	NBEA
IMPDH2	1.89E-24	0.373101	0.485	0.385	5.80E-20	Vein	IMPDH2
AVPI1	1.95E-24	-0.173493	0.222	0.417	5.98E-20	Artery	AVPI1
YBX3	1.95E-24	0.277451	0.975	0.97	6.00E-20	Vein	YBX3
ATP6V0E1	1.98E-24	-0.263374	0.708	0.786	6.08E-20	Artery	ATP6V0E1
GLRX	2.00E-24	-0.425653	0.203	0.376	6.15E-20	Artery	GLRX
DCTN3	2.19E-24	0.299235	0.646	0.58	6.72E-20	Vein	DCTN3
CDH6	2.32E-24	0.32299	0.467	0.354	7.14E-20	Vein	CDH6
TP53TG1	2.36E-24	-0.155795	0.188	0.365	7.26E-20	Artery	TP53TG1
CTSD	2.46E-24	-0.286418	0.624	0.793	7.55E-20	Artery	CTSD
PHF5A	2.57E-24	-0.14756	0.177	0.351	7.91E-20	Artery	PHF5A
NCKAP1	2.73E-24	-0.293568	0.615	0.797	8.39E-20	Artery	NCKAP1
PKD1	2.78E-24	-0.256332	0.339	0.535	8.53E-20	Artery	PKD1
SMYD4	2.87E-24	0.374081	0.338	0.22	8.83E-20	Vein	SMYD4
L3HYPDH	2.97E-24	-0.153966	0.07	0.213	9.13E-20	Artery	L3HYPDH
DDX39B	2.98E-24	0.327044	0.671	0.596	9.16E-20	Vein	DDX39B
IGIP	3.48E-24	-0.137925	0.055	0.19	1.07E-19	Artery	IGIP
RPL35	3.53E-24	0.302532	0.964	0.942	1.08E-19	Vein	RPL35
PTPN21	3.61E-24	-0.178229	0.12	0.278	1.11E-19	Artery	PTPN21
FGF13	3.65E-24	-0.136488	0.075	0.22	1.12E-19	Artery	FGF13
ADGRA3	3.67E-24	-0.152603	0.036	0.16	1.13E-19	Artery	ADGRA3
CPEB4	3.94E-24	-0.300347	0.381	0.567	1.21E-19	Artery	CPEB4
MT-ND5	3.95E-24	-0.288174	0.993	0.992	1.21E-19	Artery	MT-ND5
RHOBTB1	4.06E-24	-0.157903	0.022	0.137	1.25E-19	Artery	RHOBTB1
GAB2	4.09E-24	-0.160412	0.091	0.241	1.26E-19	Artery	GAB2
SYNM	4.10E-24	-0.38989	0.743	0.874	1.26E-19	Artery	SYNM
C14orf132	4.15E-24	-0.151195	0.06	0.199	1.28E-19	Artery	C14orf132
FNDC3B	4.25E-24	-0.247426	0.377	0.574	1.31E-19	Artery	FNDC3B
CDK14	4.35E-24	-0.141648	0.095	0.25	1.34E-19	Artery	CDK14
ISM1	4.77E-24	-0.195611	0.015	0.125	1.47E-19	Artery	ISM1
COX6B1	5.66E-24	0.283668	0.863	0.787	1.74E-19	Vein	COX6B1
NFATC4	6.18E-24	0.224032	0.318	0.193	1.90E-19	Vein	NFATC4
DGKG	6.52E-24	0.324618	0.327	0.203	2.01E-19	Vein	DGKG
KDSR	6.70E-24	-0.239731	0.343	0.531	2.06E-19	Artery	KDSR
NSUN7	7.05E-24	-0.126532	0.019	0.133	2.17E-19	Artery	NSUN7
HSPA1B	7.57E-24	-0.334376	0.828	0.916	2.33E-19	Artery	HSPA1B
RPS27L	7.88E-24	-0.350395	0.739	0.792	2.42E-19	Artery	RPS27L
ZFP36	9.00E-24	-0.614994	0.854	0.932	2.77E-19	Artery	ZFP36
ANKRD11	9.05E-24	0.344465	0.686	0.617	2.78E-19	Vein	ANKRD11
SPSB1	9.33E-24	-0.194314	0.126	0.28	2.87E-19	Artery	SPSB1
EFHD1	9.39E-24	0.352051	0.811	0.767	2.88E-19	Vein	EFHD1
CORO1C	9.64E-24	-0.263504	0.498	0.685	2.96E-19	Artery	CORO1C
SGCB	9.70E-24	-0.238566	0.475	0.656	2.98E-19	Artery	SGCB
PDE4A	9.83E-24	0.128943	0.113	0.04	3.02E-19	Vein	PDE4A
PHB2	9.88E-24	0.345808	0.669	0.601	3.04E-19	Vein	PHB2
SH3YL1	1.13E-23	-0.138155	0.072	0.213	3.46E-19	Artery	SH3YL1
RPLP2	1.13E-23	0.2982	0.985	0.959	3.47E-19	Vein	RPLP2
RASSF9	1.15E-23	-0.14235	0.047	0.176	3.53E-19	Artery	RASSF9
MAN2A1	1.15E-23	-0.204355	0.178	0.347	3.54E-19	Artery	MAN2A1
PDZD2	1.19E-23	-0.126353	0.004	0.105	3.67E-19	Artery	PDZD2
RDH5	1.23E-23	-0.2304	0.217	0.393	3.79E-19	Artery	RDH5
DUSP3	1.24E-23	-0.21526	0.305	0.499	3.82E-19	Artery	DUSP3
INMT	1.33E-23	-0.169542	0.169	0.347	4.08E-19	Artery	INMT
SOD2	1.34E-23	0.513854	0.826	0.819	4.12E-19	Vein	SOD2
TTTY14	1.47E-23	-0.183689	0.028	0.145	4.52E-19	Artery	TTTY14
HNRNPA1	1.54E-23	0.320639	0.869	0.855	4.72E-19	Vein	HNRNPA1
ZNF827	1.59E-23	-0.158397	0.105	0.259	4.87E-19	Artery	ZNF827
DNAJC21	2.32E-23	-0.226507	0.472	0.653	7.14E-19	Artery	DNAJC21
NECAB1	2.38E-23	-0.177093	0.034	0.153	7.30E-19	Artery	NECAB1
AL627171.2	2.39E-23	-0.208479	0.268	0.461	7.34E-19	Artery	AL627171.2
CYS1	2.89E-23	-0.132451	0.061	0.195	8.87E-19	Artery	CYS1
IGSF10	3.57E-23	-0.168138	0.006	0.107	1.10E-18	Artery	IGSF10
WIPF3	3.81E-23	-0.128781	0.028	0.144	1.17E-18	Artery	WIPF3
SCMH1	3.85E-23	-0.14008	0.126	0.288	1.18E-18	Artery	SCMH1
SHB	4.33E-23	-0.13476	0.042	0.164	1.33E-18	Artery	SHB
MAPK4	4.86E-23	-0.128034	0.025	0.139	1.50E-18	Artery	MAPK4
SYT11	4.88E-23	-0.18622	0.237	0.419	1.50E-18	Artery	SYT11
TOX	4.96E-23	-0.104077	0.005	0.105	1.52E-18	Artery	TOX
LRRC8C	4.97E-23	0.113586	0.122	0.046	1.53E-18	Vein	LRRC8C
NDUFAF8	5.04E-23	-0.182204	0.299	0.486	1.55E-18	Artery	NDUFAF8
PACS1	5.33E-23	-0.180065	0.172	0.342	1.64E-18	Artery	PACS1
NAA38	5.57E-23	-0.282237	0.485	0.637	1.71E-18	Artery	NAA38
CYB5A	7.33E-23	-0.131992	0.252	0.445	2.25E-18	Artery	CYB5A
CAT	7.38E-23	0.31639	0.441	0.332	2.27E-18	Vein	CAT
LSM6	8.41E-23	-0.146049	0.208	0.393	2.58E-18	Artery	LSM6
COMT	8.43E-23	-0.236627	0.461	0.636	2.59E-18	Artery	COMT
CDC14B	9.72E-23	-0.194664	0.21	0.391	2.99E-18	Artery	CDC14B
MAP3K7CL	9.88E-23	0.319801	0.364	0.24	3.04E-18	Vein	MAP3K7CL
TEX2	9.97E-23	-0.155409	0.09	0.235	3.06E-18	Artery	TEX2
SERF2	1.02E-22	-0.261922	0.948	0.935	3.12E-18	Artery	SERF2
PRMT2	1.14E-22	-0.214792	0.546	0.722	3.50E-18	Artery	PRMT2
GPNMB	1.14E-22	-0.234221	0.361	0.546	3.51E-18	Artery	GPNMB
PI15	1.20E-22	0.313407	0.061	0.014	3.70E-18	Vein	PI15
RPS6KA6	1.28E-22	-0.145334	0.035	0.152	3.92E-18	Artery	RPS6KA6
FHOD1	1.31E-22	0.104021	0.111	0.04	4.03E-18	Vein	FHOD1
VIPR2	1.39E-22	-0.173061	0.137	0.295	4.28E-18	Artery	VIPR2
SRRM2	1.42E-22	0.257667	0.909	0.91	4.38E-18	Vein	SRRM2
ZMPSTE24	1.62E-22	-0.155959	0.192	0.368	4.96E-18	Artery	ZMPSTE24
IDH3A	1.66E-22	-0.144334	0.178	0.347	5.12E-18	Artery	IDH3A
COL3A1	1.71E-22	-0.374814	0.693	0.818	5.26E-18	Artery	COL3A1
TBL1XR1	1.73E-22	-0.232995	0.394	0.588	5.30E-18	Artery	TBL1XR1
PLPBP	1.89E-22	-0.179675	0.277	0.459	5.79E-18	Artery	PLPBP
SRGN	1.90E-22	-0.255848	0.19	0.353	5.84E-18	Artery	SRGN
AL121839.2	2.15E-22	-0.136578	0.003	0.098	6.61E-18	Artery	AL121839.2
PDE8B	2.36E-22	-0.145571	0.02	0.127	7.25E-18	Artery	PDE8B
LARS	2.39E-22	-0.229343	0.433	0.633	7.33E-18	Artery	LARS
MT-ND6	2.39E-22	-0.322003	0.248	0.421	7.34E-18	Artery	MT-ND6
TIMM10	2.48E-22	-0.16144	0.262	0.444	7.62E-18	Artery	TIMM10
SMARCA2	2.53E-22	-0.237163	0.393	0.58	7.78E-18	Artery	SMARCA2
RAB9B	2.60E-22	-0.152722	0.074	0.208	7.99E-18	Artery	RAB9B
YWHAZ	2.64E-22	0.300367	0.851	0.866	8.10E-18	Vein	YWHAZ
RHOBTB2	2.64E-22	-0.16624	0.086	0.224	8.12E-18	Artery	RHOBTB2
ADGRE5	2.86E-22	-0.200726	0.328	0.517	8.79E-18	Artery	ADGRE5
KLF10	3.06E-22	0.373104	0.611	0.528	9.39E-18	Vein	KLF10
CHPT1	3.10E-22	-0.146605	0.231	0.414	9.52E-18	Artery	CHPT1
SOBP	3.22E-22	-0.202799	0.277	0.461	9.91E-18	Artery	SOBP
CES1	3.24E-22	-0.235733	0.196	0.354	9.97E-18	Artery	CES1
EIF3F	3.30E-22	0.302619	0.779	0.76	1.01E-17	Vein	EIF3F
ITPK1	3.52E-22	0.325706	0.502	0.401	1.08E-17	Vein	ITPK1
STAT3	3.59E-22	0.276743	0.802	0.799	1.10E-17	Vein	STAT3
SLC19A2	3.93E-22	-0.17008	0.042	0.161	1.21E-17	Artery	SLC19A2
ACACB	4.18E-22	0.197543	0.172	0.081	1.29E-17	Vein	ACACB
DESI2	4.43E-22	-0.191527	0.317	0.502	1.36E-17	Artery	DESI2
RGPD5	4.57E-22	-0.181306	0.072	0.205	1.40E-17	Artery	RGPD5
VGLL4	4.81E-22	-0.233603	0.432	0.617	1.48E-17	Artery	VGLL4
SET	5.07E-22	0.303098	0.829	0.785	1.56E-17	Vein	SET
ITPRID2	5.16E-22	-0.194059	0.202	0.371	1.59E-17	Artery	ITPRID2
GEM	5.19E-22	-0.13354	0.365	0.569	1.59E-17	Artery	GEM
HAND2-AS1	5.51E-22	-0.117507	0.004	0.098	1.69E-17	Artery	HAND2-AS1
FBXO16	5.62E-22	-0.117697	0.03	0.144	1.73E-17	Artery	FBXO16
UGGT2	6.05E-22	-0.211663	0.295	0.483	1.86E-17	Artery	UGGT2
RAI2	6.24E-22	-0.101379	0.062	0.193	1.92E-17	Artery	RAI2
CYTIP	6.57E-22	-0.123998	0.019	0.124	2.02E-17	Artery	CYTIP
RSL1D1	7.77E-22	0.329096	0.631	0.554	2.39E-17	Vein	RSL1D1
NDUFAF2	7.78E-22	-0.216651	0.326	0.507	2.39E-17	Artery	NDUFAF2
WFS1	8.63E-22	-0.169961	0.212	0.388	2.65E-17	Artery	WFS1
AL583808.1	9.31E-22	-0.127467	0.007	0.103	2.86E-17	Artery	AL583808.1
AMPH	9.37E-22	0.109801	0.121	0.047	2.88E-17	Vein	AMPH
AGRN	9.43E-22	0.146519	0.118	0.045	2.90E-17	Vein	AGRN
NNT-AS1	9.91E-22	-0.155401	0.126	0.281	3.05E-17	Artery	NNT-AS1
MAP3K20	1.03E-21	0.274281	0.844	0.845	3.16E-17	Vein	MAP3K20
AKAP8	1.05E-21	0.233051	0.317	0.199	3.23E-17	Vein	AKAP8
ARHGAP23	1.07E-21	-0.149302	0.14	0.296	3.28E-17	Artery	ARHGAP23
WSB2	1.12E-21	-0.124873	0.141	0.3	3.45E-17	Artery	WSB2
TMSB10	1.31E-21	0.480446	0.96	0.856	4.01E-17	Vein	TMSB10
TMEM167A	1.50E-21	-0.173737	0.287	0.469	4.61E-17	Artery	TMEM167A
PLCD3	1.52E-21	-0.133306	0.08	0.216	4.66E-17	Artery	PLCD3
ST3GAL1	1.52E-21	0.169114	0.191	0.094	4.66E-17	Vein	ST3GAL1
KLF11	1.52E-21	0.287329	0.402	0.283	4.68E-17	Vein	KLF11
ADPRHL1	1.68E-21	-0.154732	0.048	0.169	5.16E-17	Artery	ADPRHL1
HES6	1.72E-21	0.195152	0.186	0.093	5.30E-17	Vein	HES6
SF3B2	1.79E-21	0.299671	0.654	0.601	5.51E-17	Vein	SF3B2
ZNF83	1.81E-21	-0.211771	0.211	0.379	5.57E-17	Artery	ZNF83
AL391807.1	1.94E-21	0.10119	0.074	0.021	5.96E-17	Vein	AL391807.1
CUL4B	1.95E-21	-0.173477	0.168	0.327	5.99E-17	Artery	CUL4B
APOB	2.02E-21	-0.150146	0.049	0.169	6.22E-17	Artery	APOB
RAB27A	2.20E-21	-0.150161	0.174	0.335	6.75E-17	Artery	RAB27A
CANX	2.61E-21	-0.257067	0.674	0.808	8.02E-17	Artery	CANX
SLC16A1	2.64E-21	-0.160914	0.062	0.186	8.11E-17	Artery	SLC16A1
MTHFD1	2.94E-21	-0.16156	0.156	0.315	9.03E-17	Artery	MTHFD1
ITM2C	3.26E-21	0.247288	0.333	0.218	1.00E-16	Vein	ITM2C
CDK6	3.27E-21	-0.191261	0.208	0.375	1.00E-16	Artery	CDK6
NKD1	3.27E-21	-0.225574	0.263	0.446	1.01E-16	Artery	NKD1
TMEM237	3.34E-21	-0.145447	0.105	0.249	1.03E-16	Artery	TMEM237
NDN	3.55E-21	0.247712	0.595	0.471	1.09E-16	Vein	NDN
CAPZA2	3.57E-21	-0.232805	0.662	0.785	1.10E-16	Artery	CAPZA2
RPL13A	3.59E-21	0.316381	0.985	0.979	1.10E-16	Vein	RPL13A
AHNAK	3.61E-21	-0.274917	0.934	0.946	1.11E-16	Artery	AHNAK
SKP1	3.80E-21	-0.201113	0.917	0.931	1.17E-16	Artery	SKP1
CAB39	3.97E-21	-0.17255	0.275	0.457	1.22E-16	Artery	CAB39
MIR29B2CHG	4.01E-21	0.306725	0.345	0.222	1.23E-16	Vein	MIR29B2CHG
IGSF8	4.04E-21	-0.154532	0.171	0.332	1.24E-16	Artery	IGSF8
FAM20B	4.10E-21	-0.177487	0.261	0.439	1.26E-16	Artery	FAM20B
CBX1	4.21E-21	-0.144749	0.281	0.462	1.29E-16	Artery	CBX1
SCOC	5.41E-21	-0.206745	0.442	0.626	1.66E-16	Artery	SCOC
RIMS1	5.49E-21	-0.111525	0.002	0.09	1.69E-16	Artery	RIMS1
ACSL3	5.76E-21	-0.236018	0.375	0.554	1.77E-16	Artery	ACSL3
DCHS1	6.09E-21	-0.109744	0.016	0.115	1.87E-16	Artery	DCHS1
PAX9	6.26E-21	-0.103784	0.008	0.102	1.93E-16	Artery	PAX9
CD9	6.46E-21	0.327349	0.864	0.822	1.99E-16	Vein	CD9
PTGIR	6.58E-21	0.366254	0.405	0.296	2.02E-16	Vein	PTGIR
AKAP13	7.05E-21	0.331644	0.646	0.576	2.17E-16	Vein	AKAP13
EXOC5	7.26E-21	-0.186294	0.265	0.438	2.23E-16	Artery	EXOC5
GK5	7.55E-21	-0.1955	0.076	0.204	2.32E-16	Artery	GK5
RBM25	7.64E-21	0.3139	0.758	0.731	2.35E-16	Vein	RBM25
MAT2A	8.29E-21	0.438077	0.627	0.559	2.55E-16	Vein	MAT2A
RCL1	8.74E-21	-0.161318	0.146	0.296	2.69E-16	Artery	RCL1
ILRUN	9.60E-21	-0.182568	0.223	0.389	2.95E-16	Artery	ILRUN
ASCC3	1.03E-20	-0.200649	0.197	0.36	3.16E-16	Artery	ASCC3
ANKRD50	1.05E-20	-0.180648	0.143	0.29	3.24E-16	Artery	ANKRD50
OMD	1.08E-20	-0.140386	0.015	0.112	3.31E-16	Artery	OMD
MT-CO1	1.12E-20	0.226085	0.999	0.999	3.43E-16	Vein	MT-CO1
HOXC6	1.16E-20	0.119517	0.119	0.047	3.57E-16	Vein	HOXC6
UCHL3	1.20E-20	-0.110844	0.131	0.28	3.69E-16	Artery	UCHL3
KCTD9	1.23E-20	-0.183526	0.288	0.464	3.77E-16	Artery	KCTD9
AC025164.1	1.29E-20	0.127114	0.11	0.042	3.97E-16	Vein	AC025164.1
ANGPT2	1.31E-20	-0.190043	0.322	0.502	4.02E-16	Artery	ANGPT2
DBNDD2	1.36E-20	0.292112	0.833	0.812	4.19E-16	Vein	DBNDD2
UNC50	1.44E-20	-0.115759	0.184	0.353	4.41E-16	Artery	UNC50
AL158212.2	1.50E-20	-0.143703	0.032	0.138	4.60E-16	Artery	AL158212.2
PCA3	1.54E-20	-0.164078	0.014	0.109	4.72E-16	Artery	PCA3
FAM98A	1.68E-20	-0.143809	0.17	0.329	5.15E-16	Artery	FAM98A
OAZ1	1.83E-20	-0.180706	0.893	0.916	5.64E-16	Artery	OAZ1
CASK	1.91E-20	-0.1685	0.169	0.323	5.87E-16	Artery	CASK
SNHG32	1.96E-20	-0.207809	0.456	0.634	6.01E-16	Artery	SNHG32
PRDM16-DT	1.98E-20	-0.201479	0.187	0.343	6.08E-16	Artery	PRDM16-DT
CCDC8	2.01E-20	-0.109331	0.026	0.13	6.19E-16	Artery	CCDC8
NALCN	2.18E-20	-0.101358	0.001	0.086	6.71E-16	Artery	NALCN
DENR	2.24E-20	-0.161128	0.297	0.479	6.87E-16	Artery	DENR
ENOX2	2.26E-20	-0.148157	0.108	0.247	6.95E-16	Artery	ENOX2
POLR2J3	2.31E-20	0.340558	0.449	0.339	7.10E-16	Vein	POLR2J3
NECTIN1	2.31E-20	0.103103	0.114	0.044	7.10E-16	Vein	NECTIN1
LIMA1	2.38E-20	0.305175	0.555	0.447	7.30E-16	Vein	LIMA1
TMEM130	2.63E-20	-0.111842	0.002	0.087	8.08E-16	Artery	TMEM130
TCEA1	2.63E-20	-0.240338	0.686	0.812	8.09E-16	Artery	TCEA1
PHLDA3	2.63E-20	0.383823	0.542	0.459	8.10E-16	Vein	PHLDA3
MAPKAPK3	2.64E-20	0.139534	0.161	0.076	8.10E-16	Vein	MAPKAPK3
FNIP2	2.65E-20	-0.191245	0.166	0.314	8.16E-16	Artery	FNIP2
DAP	2.72E-20	-0.13335	0.243	0.417	8.37E-16	Artery	DAP
DYNLT3	2.78E-20	-0.226412	0.532	0.714	8.54E-16	Artery	DYNLT3
APIP	2.83E-20	-0.129446	0.162	0.319	8.71E-16	Artery	APIP
DNAJC27	3.10E-20	0.283394	0.202	0.108	9.54E-16	Vein	DNAJC27
NBL1	3.34E-20	0.434963	0.655	0.611	1.03E-15	Vein	NBL1
TMEM256	3.37E-20	0.322426	0.542	0.459	1.04E-15	Vein	TMEM256
GREB1L	3.46E-20	-0.147927	0.016	0.111	1.06E-15	Artery	GREB1L
MAGI2	3.51E-20	-0.203284	0.304	0.487	1.08E-15	Artery	MAGI2
TFDP2	3.73E-20	-0.190096	0.307	0.484	1.15E-15	Artery	TFDP2
NEK6	3.85E-20	-0.111348	0.02	0.118	1.18E-15	Artery	NEK6
SYNJ2	4.20E-20	-0.165115	0.064	0.182	1.29E-15	Artery	SYNJ2
PTK2	4.29E-20	0.322466	0.741	0.71	1.32E-15	Vein	PTK2
LMO4	4.58E-20	-0.262486	0.586	0.734	1.41E-15	Artery	LMO4
ZFAND1	4.89E-20	-0.188709	0.359	0.538	1.50E-15	Artery	ZFAND1
TOB2	4.90E-20	0.369579	0.688	0.641	1.51E-15	Vein	TOB2
TKT	4.96E-20	-0.251746	0.575	0.73	1.52E-15	Artery	TKT
PCDH20	5.10E-20	-0.121547	0.023	0.124	1.57E-15	Artery	PCDH20
BSG	5.28E-20	0.284108	0.79	0.749	1.62E-15	Vein	BSG
BOD1	5.39E-20	-0.13839	0.206	0.371	1.66E-15	Artery	BOD1
ZDHHC2	6.41E-20	-0.130019	0.081	0.209	1.97E-15	Artery	ZDHHC2
WSB1	6.69E-20	-0.335288	0.82	0.91	2.06E-15	Artery	WSB1
LIX1L	6.70E-20	-0.192032	0.31	0.483	2.06E-15	Artery	LIX1L
TTC37	6.74E-20	-0.208431	0.424	0.598	2.07E-15	Artery	TTC37
ANXA5	6.77E-20	-0.187852	0.803	0.884	2.08E-15	Artery	ANXA5
MIR22HG	7.16E-20	0.361698	0.511	0.417	2.20E-15	Vein	MIR22HG
HIST1H2AC	7.18E-20	-0.152077	0.109	0.245	2.21E-15	Artery	HIST1H2AC
REXO2	7.30E-20	-0.202769	0.482	0.656	2.24E-15	Artery	REXO2
ECRG4	7.62E-20	-0.475805	0.413	0.539	2.34E-15	Artery	ECRG4
CST6	7.74E-20	-0.11676	0.023	0.122	2.38E-15	Artery	CST6
ARL1	8.30E-20	-0.176565	0.42	0.597	2.55E-15	Artery	ARL1
ZMAT1	8.32E-20	-0.164374	0.102	0.24	2.56E-15	Artery	ZMAT1
SLC25A5	8.55E-20	0.319022	0.67	0.625	2.63E-15	Vein	SLC25A5
NTN4	8.77E-20	0.299967	0.53	0.443	2.70E-15	Vein	NTN4
IFI16	9.08E-20	0.406534	0.612	0.55	2.79E-15	Vein	IFI16
CTIF	9.85E-20	-0.147407	0.128	0.268	3.03E-15	Artery	CTIF
CEBPD	9.92E-20	0.371394	0.948	0.939	3.05E-15	Vein	CEBPD
C1QA	1.03E-19	0.181434	0.137	0.06	3.16E-15	Vein	C1QA
UBXN2B	1.04E-19	-0.133629	0.077	0.201	3.20E-15	Artery	UBXN2B
FOXP2	1.05E-19	-0.107187	0.001	0.083	3.23E-15	Artery	FOXP2
ZNF503	1.12E-19	0.409536	0.343	0.242	3.44E-15	Vein	ZNF503
STS	1.13E-19	-0.133837	0.065	0.183	3.47E-15	Artery	STS
CMBL	1.19E-19	-0.127411	0.1	0.235	3.66E-15	Artery	CMBL
SPRY4	1.40E-19	-0.161482	0.103	0.234	4.31E-15	Artery	SPRY4
SHC4	1.41E-19	-0.103081	0.005	0.09	4.33E-15	Artery	SHC4
SNAP25	1.50E-19	-0.106472	0	0.08	4.60E-15	Artery	SNAP25
KLHL26	1.52E-19	-0.138427	0.123	0.265	4.66E-15	Artery	KLHL26
ASPH	1.57E-19	-0.238414	0.519	0.69	4.81E-15	Artery	ASPH
PRKCSH	1.65E-19	0.298938	0.408	0.305	5.06E-15	Vein	PRKCSH
AFF1	1.76E-19	-0.19941	0.293	0.465	5.42E-15	Artery	AFF1
EHD1	1.91E-19	0.330354	0.56	0.491	5.87E-15	Vein	EHD1
SRP9	1.95E-19	-0.216656	0.514	0.661	5.98E-15	Artery	SRP9
HNRNPC	1.95E-19	0.268877	0.761	0.759	6.00E-15	Vein	HNRNPC
ITGAV	1.96E-19	-0.219155	0.434	0.619	6.02E-15	Artery	ITGAV
REL	1.99E-19	0.350694	0.363	0.252	6.11E-15	Vein	REL
AKT1	2.00E-19	-0.157278	0.338	0.514	6.13E-15	Artery	AKT1
IL6ST	2.00E-19	-0.253926	0.617	0.775	6.14E-15	Artery	IL6ST
IMMP2L	2.30E-19	-0.147603	0.199	0.361	7.06E-15	Artery	IMMP2L
KAZALD1	2.32E-19	-0.118077	0.047	0.157	7.12E-15	Artery	KAZALD1
UNC93B1	2.38E-19	0.145302	0.186	0.096	7.32E-15	Vein	UNC93B1
SERAC1	2.40E-19	-0.122144	0.053	0.166	7.37E-15	Artery	SERAC1
DDX17	2.41E-19	0.160622	0.874	0.889	7.41E-15	Vein	DDX17
NDUFB10	2.52E-19	0.247142	0.816	0.766	7.76E-15	Vein	NDUFB10
TMEM38B	2.73E-19	0.346218	0.457	0.37	8.39E-15	Vein	TMEM38B
SERINC1	2.80E-19	-0.216627	0.732	0.827	8.62E-15	Artery	SERINC1
A2M	2.94E-19	0.282221	0.956	0.96	9.03E-15	Vein	A2M
SPAG7	3.12E-19	0.293502	0.544	0.47	9.60E-15	Vein	SPAG7
UQCRC2	3.50E-19	0.276026	0.604	0.529	1.08E-14	Vein	UQCRC2
STUM	4.43E-19	0.148057	0.139	0.063	1.36E-14	Vein	STUM
DUSP7	4.71E-19	-0.111979	0.057	0.171	1.45E-14	Artery	DUSP7
PHF10	4.86E-19	-0.162093	0.259	0.425	1.49E-14	Artery	PHF10
KLHL21	5.46E-19	-0.172485	0.185	0.337	1.68E-14	Artery	KLHL21
MSC	5.68E-19	-0.101339	0.056	0.169	1.75E-14	Artery	MSC
SUB1	5.84E-19	-0.229281	0.736	0.805	1.80E-14	Artery	SUB1
OIP5-AS1	5.96E-19	-0.193979	0.385	0.57	1.83E-14	Artery	OIP5-AS1
SLCO5A1	6.07E-19	-0.126869	0.03	0.13	1.86E-14	Artery	SLCO5A1
NAALADL2	6.11E-19	-0.112273	0.033	0.134	1.88E-14	Artery	NAALADL2
UHRF1BP1L	6.19E-19	-0.173519	0.166	0.311	1.90E-14	Artery	UHRF1BP1L
GRN	6.44E-19	0.283898	0.544	0.463	1.98E-14	Vein	GRN
PNPLA2	6.81E-19	0.323587	0.615	0.565	2.09E-14	Vein	PNPLA2
SNX18	6.86E-19	-0.194182	0.402	0.577	2.11E-14	Artery	SNX18
RNF38	6.88E-19	-0.134972	0.218	0.384	2.12E-14	Artery	RNF38
TACC1	7.34E-19	0.275596	0.881	0.873	2.26E-14	Vein	TACC1
CITED4	7.83E-19	0.24565	0.345	0.239	2.41E-14	Vein	CITED4
DCUN1D4	7.87E-19	-0.131218	0.203	0.359	2.42E-14	Artery	DCUN1D4
HNRNPDL	8.14E-19	-0.214426	0.831	0.908	2.50E-14	Artery	HNRNPDL
PSMG1	8.32E-19	-0.115104	0.137	0.276	2.56E-14	Artery	PSMG1
INAFM1	8.99E-19	0.307838	0.556	0.475	2.76E-14	Vein	INAFM1
GPC4	9.13E-19	-0.107263	0.106	0.243	2.81E-14	Artery	GPC4
RAB31	9.17E-19	-0.248711	0.534	0.692	2.82E-14	Artery	RAB31
HTATIP2	9.35E-19	-0.133099	0.212	0.373	2.87E-14	Artery	HTATIP2
RBSN	9.84E-19	-0.166901	0.172	0.318	3.03E-14	Artery	RBSN
CARMN	1.09E-18	0.641683	0.83	0.826	3.35E-14	Vein	CARMN
CRIM1-DT	1.10E-18	-0.134729	0.118	0.252	3.38E-14	Artery	CRIM1-DT
PTPRA	1.11E-18	0.28274	0.58	0.497	3.42E-14	Vein	PTPRA
MAP3K8	1.11E-18	0.262087	0.486	0.383	3.42E-14	Vein	MAP3K8
CALHM2	1.14E-18	0.264252	0.356	0.257	3.49E-14	Vein	CALHM2
JAZF1	1.20E-18	-0.123046	0.207	0.368	3.68E-14	Artery	JAZF1
ADGRL2	1.28E-18	-0.13773	0.093	0.218	3.95E-14	Artery	ADGRL2
POR	1.33E-18	0.242748	0.365	0.256	4.09E-14	Vein	POR
GKAP1	1.35E-18	-0.133439	0.123	0.259	4.15E-14	Artery	GKAP1
C1orf21	1.39E-18	0.191174	0.258	0.152	4.26E-14	Vein	C1orf21
TNFAIP8	1.43E-18	-0.167881	0.293	0.465	4.40E-14	Artery	TNFAIP8
CYLD	1.43E-18	-0.245393	0.327	0.486	4.41E-14	Artery	CYLD
PLXNB2	1.45E-18	-0.151448	0.241	0.405	4.47E-14	Artery	PLXNB2
SFRP2	1.50E-18	-0.176387	0.041	0.146	4.60E-14	Artery	SFRP2
PLOD1	1.54E-18	0.183326	0.247	0.149	4.72E-14	Vein	PLOD1
TPH1	1.59E-18	-0.139968	0.012	0.097	4.89E-14	Artery	TPH1
RAN	1.60E-18	0.292335	0.753	0.705	4.90E-14	Vein	RAN
DUSP8	1.60E-18	0.398219	0.522	0.433	4.92E-14	Vein	DUSP8
SLIRP	1.72E-18	-0.233588	0.584	0.68	5.27E-14	Artery	SLIRP
SNHG17	1.72E-18	0.21737	0.272	0.171	5.28E-14	Vein	SNHG17
BACH1	1.72E-18	0.29479	0.376	0.274	5.30E-14	Vein	BACH1
HCLS1	1.79E-18	0.137243	0.068	0.021	5.50E-14	Vein	HCLS1
SKIL	1.91E-18	-0.237859	0.375	0.55	5.88E-14	Artery	SKIL
WASHC3	1.94E-18	-0.168076	0.32	0.488	5.95E-14	Artery	WASHC3
CDKN1A	2.01E-18	0.332126	0.815	0.801	6.18E-14	Vein	CDKN1A
CKS1B	2.02E-18	-0.131942	0.199	0.36	6.22E-14	Artery	CKS1B
RAB20	2.12E-18	0.271765	0.383	0.281	6.52E-14	Vein	RAB20
CREBRF	2.15E-18	-0.239704	0.497	0.664	6.62E-14	Artery	CREBRF
CLDND1	2.23E-18	-0.172314	0.377	0.55	6.85E-14	Artery	CLDND1
THUMPD2	2.27E-18	-0.126739	0.122	0.256	6.97E-14	Artery	THUMPD2
TNFRSF14	2.36E-18	0.157869	0.162	0.08	7.24E-14	Vein	TNFRSF14
OXCT1	2.52E-18	-0.141548	0.178	0.329	7.73E-14	Artery	OXCT1
THRA	2.64E-18	0.337657	0.686	0.658	8.11E-14	Vein	THRA
RYR3	2.64E-18	-0.127416	0.003	0.081	8.11E-14	Artery	RYR3
PCBD1	2.73E-18	-0.203257	0.49	0.623	8.39E-14	Artery	PCBD1
WWP2	2.74E-18	-0.151328	0.237	0.397	8.41E-14	Artery	WWP2
TCF25	2.79E-18	0.247333	0.817	0.788	8.57E-14	Vein	TCF25
ZNF483	2.82E-18	-0.141654	0.075	0.192	8.67E-14	Artery	ZNF483
MAPK1	2.87E-18	-0.166784	0.327	0.498	8.83E-14	Artery	MAPK1
ZCCHC14	3.20E-18	-0.168827	0.158	0.296	9.83E-14	Artery	ZCCHC14
MVB12A	3.21E-18	0.222628	0.353	0.253	9.88E-14	Vein	MVB12A
ZRANB2	3.50E-18	-0.240884	0.606	0.756	1.08E-13	Artery	ZRANB2
RNF11	3.62E-18	-0.185482	0.388	0.564	1.11E-13	Artery	RNF11
MEGF9	3.68E-18	-0.162086	0.124	0.256	1.13E-13	Artery	MEGF9
GNS	3.71E-18	-0.165193	0.192	0.342	1.14E-13	Artery	GNS
FAM133B	3.76E-18	-0.37901	0.485	0.62	1.16E-13	Artery	FAM133B
RRBP1	4.46E-18	0.342972	0.579	0.529	1.37E-13	Vein	RRBP1
TGIF1	4.56E-18	-0.105159	0.117	0.25	1.40E-13	Artery	TGIF1
HLTF	4.59E-18	-0.168512	0.181	0.327	1.41E-13	Artery	HLTF
C17orf49	4.63E-18	0.276024	0.383	0.287	1.42E-13	Vein	C17orf49
MRPS18C	4.66E-18	-0.146075	0.307	0.472	1.43E-13	Artery	MRPS18C
TSR2	4.87E-18	-0.15284	0.324	0.493	1.50E-13	Artery	TSR2
FMNL3	5.00E-18	0.129905	0.191	0.099	1.54E-13	Vein	FMNL3
CCDC50	5.10E-18	-0.210618	0.527	0.704	1.57E-13	Artery	CCDC50
PITPNB	5.75E-18	-0.221907	0.549	0.705	1.77E-13	Artery	PITPNB
PPP4R3B	5.90E-18	-0.174589	0.351	0.525	1.81E-13	Artery	PPP4R3B
PDXDC1	6.19E-18	-0.108054	0.202	0.357	1.90E-13	Artery	PDXDC1
ST7	6.33E-18	-0.12398	0.074	0.192	1.95E-13	Artery	ST7
COL16A1	6.59E-18	0.197159	0.28	0.179	2.03E-13	Vein	COL16A1
IL32	6.60E-18	0.109491	0.066	0.02	2.03E-13	Vein	IL32
CYFIP1	6.67E-18	-0.209185	0.404	0.573	2.05E-13	Artery	CYFIP1
MPZL1	7.86E-18	-0.13991	0.172	0.316	2.42E-13	Artery	MPZL1
RNF7	8.01E-18	-0.224171	0.623	0.729	2.46E-13	Artery	RNF7
RERG	8.03E-18	0.251012	0.47	0.374	2.47E-13	Vein	RERG
SNX19	8.23E-18	-0.148441	0.126	0.257	2.53E-13	Artery	SNX19
RDX	8.65E-18	-0.201106	0.544	0.708	2.66E-13	Artery	RDX
TUBA4A	8.72E-18	-0.171928	0.251	0.415	2.68E-13	Artery	TUBA4A
DCUN1D3	8.76E-18	-0.200108	0.204	0.349	2.69E-13	Artery	DCUN1D3
HMGN5	1.04E-17	-0.104531	0.103	0.228	3.19E-13	Artery	HMGN5
OTULIN	1.06E-17	-0.213772	0.197	0.341	3.27E-13	Artery	OTULIN
NEIL1	1.13E-17	0.127398	0.104	0.042	3.48E-13	Vein	NEIL1
SREK1IP1	1.16E-17	-0.176111	0.388	0.557	3.58E-13	Artery	SREK1IP1
HSPE1	1.19E-17	-0.270855	0.699	0.84	3.66E-13	Artery	HSPE1
ATP5PB	1.20E-17	0.269358	0.648	0.598	3.69E-13	Vein	ATP5PB
SLC2A1	1.20E-17	-0.100643	0.054	0.16	3.69E-13	Artery	SLC2A1
POLR2L	1.21E-17	-0.194015	0.658	0.763	3.71E-13	Artery	POLR2L
PIAS2	1.24E-17	-0.161411	0.096	0.216	3.80E-13	Artery	PIAS2
POGLUT3	1.27E-17	-0.124291	0.141	0.276	3.90E-13	Artery	POGLUT3
UBQLN1	1.28E-17	-0.18808	0.317	0.482	3.93E-13	Artery	UBQLN1
COX5B	1.31E-17	0.24346	0.852	0.822	4.03E-13	Vein	COX5B
TMEM14A	1.32E-17	-0.138041	0.217	0.37	4.07E-13	Artery	TMEM14A
OSBPL9	1.33E-17	-0.206544	0.506	0.677	4.10E-13	Artery	OSBPL9
ADCY5	1.39E-17	-0.188452	0.399	0.576	4.26E-13	Artery	ADCY5
ECI2	1.42E-17	0.293307	0.421	0.33	4.36E-13	Vein	ECI2
SFPQ	1.42E-17	0.255868	0.738	0.698	4.37E-13	Vein	SFPQ
CD151	1.46E-17	-0.26606	0.896	0.931	4.49E-13	Artery	CD151
PCDH9	1.49E-17	-0.20836	0.056	0.161	4.58E-13	Artery	PCDH9
KHDRBS1	1.52E-17	0.303629	0.655	0.62	4.68E-13	Vein	KHDRBS1
LSS	1.55E-17	-0.121097	0.096	0.219	4.76E-13	Artery	LSS
OPA3	1.64E-17	0.152984	0.185	0.099	5.05E-13	Vein	OPA3
ATP5MD	1.68E-17	-0.244648	0.868	0.833	5.17E-13	Artery	ATP5MD
DNM3OS	1.78E-17	-0.115288	0.046	0.149	5.46E-13	Artery	DNM3OS
GALM	1.92E-17	-0.180837	0.083	0.2	5.92E-13	Artery	GALM
PCMTD1	2.26E-17	-0.198077	0.569	0.722	6.95E-13	Artery	PCMTD1
KCNB1	2.27E-17	0.105465	0.1	0.039	6.99E-13	Vein	KCNB1
SPIRE1	2.31E-17	-0.161097	0.223	0.372	7.11E-13	Artery	SPIRE1
STARD4	2.45E-17	-0.12255	0.058	0.164	7.54E-13	Artery	STARD4
BCKDHB	2.57E-17	-0.114804	0.101	0.225	7.89E-13	Artery	BCKDHB
PREPL	2.65E-17	-0.166265	0.284	0.446	8.15E-13	Artery	PREPL
PTBP2	2.77E-17	-0.150814	0.185	0.332	8.50E-13	Artery	PTBP2
RICTOR	2.82E-17	-0.246638	0.303	0.456	8.66E-13	Artery	RICTOR
TRPV2	2.90E-17	0.2096	0.256	0.16	8.90E-13	Vein	TRPV2
ZNF703	2.97E-17	0.327861	0.47	0.387	9.12E-13	Vein	ZNF703
MPDZ	3.00E-17	-0.187298	0.362	0.537	9.21E-13	Artery	MPDZ
TSPYL1	3.34E-17	-0.194098	0.402	0.563	1.03E-12	Artery	TSPYL1
CCNY	3.35E-17	-0.155689	0.271	0.428	1.03E-12	Artery	CCNY
ITM2B	3.39E-17	0.236782	0.939	0.929	1.04E-12	Vein	ITM2B
ZFHX3	3.54E-17	0.234847	0.909	0.909	1.09E-12	Vein	ZFHX3
CFAP97	3.77E-17	-0.231898	0.581	0.731	1.16E-12	Artery	CFAP97
DTNBP1	3.82E-17	-0.138903	0.205	0.353	1.17E-12	Artery	DTNBP1
NCL	3.95E-17	0.287117	0.841	0.847	1.21E-12	Vein	NCL
GCA	3.99E-17	-0.104801	0.114	0.243	1.23E-12	Artery	GCA
COL21A1	4.02E-17	0.159406	0.183	0.097	1.24E-12	Vein	COL21A1
TMBIM1	4.16E-17	-0.164149	0.409	0.588	1.28E-12	Artery	TMBIM1
LNPK	4.19E-17	-0.149794	0.275	0.449	1.29E-12	Artery	LNPK
XRRA1	4.39E-17	-0.12008	0.076	0.189	1.35E-12	Artery	XRRA1
RBM4	4.44E-17	0.298023	0.556	0.492	1.36E-12	Vein	RBM4
RBM27	4.54E-17	-0.197048	0.477	0.639	1.40E-12	Artery	RBM27
CCT3	4.57E-17	0.263025	0.697	0.673	1.41E-12	Vein	CCT3
MMUT	5.00E-17	-0.127853	0.211	0.362	1.54E-12	Artery	MMUT
RNF180	5.01E-17	-0.173827	0.27	0.427	1.54E-12	Artery	RNF180
SRSF9	5.40E-17	-0.198862	0.476	0.625	1.66E-12	Artery	SRSF9
METRN	5.40E-17	0.252998	0.397	0.304	1.66E-12	Vein	METRN
PRKD3	5.41E-17	-0.167945	0.159	0.295	1.66E-12	Artery	PRKD3
RILPL2	5.56E-17	-0.136746	0.261	0.424	1.71E-12	Artery	RILPL2
COX7C	5.80E-17	-0.162213	0.957	0.939	1.78E-12	Artery	COX7C
SIPA1	5.82E-17	0.188777	0.23	0.136	1.79E-12	Vein	SIPA1
LHFPL6	5.82E-17	0.318564	0.707	0.673	1.79E-12	Vein	LHFPL6
VPS28	5.85E-17	0.258267	0.77	0.74	1.80E-12	Vein	VPS28
DNAJC13	6.14E-17	-0.155131	0.204	0.348	1.89E-12	Artery	DNAJC13
CEP126	6.89E-17	-0.141822	0.154	0.293	2.12E-12	Artery	CEP126
GLUL	7.11E-17	0.325381	0.775	0.712	2.18E-12	Vein	GLUL
BIN1	7.21E-17	0.16491	0.188	0.105	2.22E-12	Vein	BIN1
CHMP4B	7.67E-17	-0.161732	0.449	0.618	2.36E-12	Artery	CHMP4B
TOR1AIP1	8.09E-17	-0.172341	0.339	0.505	2.49E-12	Artery	TOR1AIP1
PARD3B	8.24E-17	-0.158083	0.155	0.289	2.53E-12	Artery	PARD3B
RBMS3	8.60E-17	-0.232765	0.53	0.685	2.64E-12	Artery	RBMS3
SPIN4	9.06E-17	-0.122605	0.035	0.127	2.78E-12	Artery	SPIN4
ABCC1	9.73E-17	-0.105816	0.024	0.111	2.99E-12	Artery	ABCC1
TENT5C	1.02E-16	-0.124029	0.086	0.201	3.14E-12	Artery	TENT5C
C7orf50	1.15E-16	-0.181515	0.494	0.642	3.54E-12	Artery	C7orf50
PET100	1.17E-16	-0.182291	0.512	0.653	3.61E-12	Artery	PET100
UBA52	1.19E-16	0.22723	0.953	0.935	3.64E-12	Vein	UBA52
FNDC3A	1.22E-16	-0.206187	0.333	0.49	3.74E-12	Artery	FNDC3A
MAN2A2	1.23E-16	-0.112747	0.073	0.183	3.77E-12	Artery	MAN2A2
SCAND1	1.24E-16	0.26792	0.595	0.536	3.81E-12	Vein	SCAND1
TMEM54	1.27E-16	0.154263	0.169	0.09	3.91E-12	Vein	TMEM54
APOOL	1.36E-16	-0.17745	0.365	0.528	4.18E-12	Artery	APOOL
AOC3	1.49E-16	0.286914	0.837	0.832	4.57E-12	Vein	AOC3
CAPN2	1.54E-16	-0.228117	0.594	0.737	4.72E-12	Artery	CAPN2
CASC3	1.60E-16	-0.15149	0.359	0.54	4.90E-12	Artery	CASC3
NBPF26	1.63E-16	-0.111086	0.021	0.105	5.00E-12	Artery	NBPF26
MIR3936HG	1.64E-16	-0.102983	0.033	0.124	5.04E-12	Artery	MIR3936HG
DACT3	1.69E-16	-0.17044	0.513	0.684	5.20E-12	Artery	DACT3
ANKRD40	1.74E-16	-0.138312	0.221	0.364	5.34E-12	Artery	ANKRD40
RAPGEF1	1.75E-16	-0.141091	0.179	0.322	5.39E-12	Artery	RAPGEF1
LARP1	1.78E-16	-0.134875	0.31	0.476	5.46E-12	Artery	LARP1
HCG11	1.80E-16	-0.123264	0.078	0.188	5.52E-12	Artery	HCG11
SERINC3	1.84E-16	-0.199937	0.545	0.705	5.65E-12	Artery	SERINC3
C1QB	1.87E-16	0.13476	0.111	0.048	5.75E-12	Vein	C1QB
TRIO	1.89E-16	-0.21175	0.241	0.382	5.80E-12	Artery	TRIO
SSH1	2.02E-16	-0.174777	0.118	0.238	6.21E-12	Artery	SSH1
FBXL7	2.03E-16	-0.113317	0.084	0.196	6.24E-12	Artery	FBXL7
LINC00844	2.10E-16	-0.104318	0.033	0.123	6.47E-12	Artery	LINC00844
H2AFJ	2.11E-16	0.290058	0.843	0.846	6.50E-12	Vein	H2AFJ
RBMX	2.33E-16	0.277722	0.657	0.61	7.17E-12	Vein	RBMX
BCL2L2	2.42E-16	-0.136554	0.206	0.353	7.45E-12	Artery	BCL2L2
SULF1	2.47E-16	-0.171258	0.126	0.251	7.58E-12	Artery	SULF1
VSIR	2.51E-16	0.295463	0.47	0.398	7.70E-12	Vein	VSIR
ATL2	2.52E-16	-0.139745	0.199	0.342	7.74E-12	Artery	ATL2
CTHRC1	2.57E-16	-0.175971	0.136	0.261	7.91E-12	Artery	CTHRC1
SIPA1L1	2.79E-16	-0.182473	0.277	0.434	8.58E-12	Artery	SIPA1L1
ATN1	2.81E-16	-0.150281	0.382	0.559	8.62E-12	Artery	ATN1
NPY1R	2.95E-16	0.262603	0.338	0.24	9.05E-12	Vein	NPY1R
AC100803.3	2.95E-16	0.115233	0.117	0.052	9.06E-12	Vein	AC100803.3
ARL4D	2.95E-16	0.221375	0.218	0.131	9.08E-12	Vein	ARL4D
FAM98B	2.97E-16	-0.12646	0.147	0.277	9.12E-12	Artery	FAM98B
ST6GAL1	3.01E-16	-0.100723	0.06	0.161	9.27E-12	Artery	ST6GAL1
ANAPC13	3.08E-16	-0.103467	0.245	0.402	9.47E-12	Artery	ANAPC13
EPS15	3.12E-16	-0.145391	0.299	0.463	9.58E-12	Artery	EPS15
CORO1B	3.20E-16	0.294659	0.585	0.54	9.82E-12	Vein	CORO1B
MAPK9	3.39E-16	-0.110783	0.135	0.263	1.04E-11	Artery	MAPK9
HIP1	3.61E-16	0.281573	0.552	0.481	1.11E-11	Vein	HIP1
ZBTB4	3.77E-16	-0.144117	0.326	0.495	1.16E-11	Artery	ZBTB4
AEBP2	3.82E-16	-0.188182	0.338	0.493	1.17E-11	Artery	AEBP2
TNFAIP6	3.86E-16	0.108118	0.061	0.019	1.19E-11	Vein	TNFAIP6
RILPL1	4.01E-16	-0.111201	0.195	0.339	1.23E-11	Artery	RILPL1
TSPO	4.05E-16	0.30505	0.801	0.754	1.25E-11	Vein	TSPO
PHC3	4.25E-16	-0.181325	0.315	0.482	1.31E-11	Artery	PHC3
RSL24D1	4.25E-16	-0.207107	0.722	0.802	1.31E-11	Artery	RSL24D1
MT-CO3	4.37E-16	0.23906	1	0.999	1.34E-11	Vein	MT-CO3
C7	4.41E-16	0.137561	0.11	0.048	1.36E-11	Vein	C7
PLAUR	4.44E-16	0.160856	0.216	0.127	1.36E-11	Vein	PLAUR
MAF	4.45E-16	0.193455	0.264	0.167	1.37E-11	Vein	MAF
PTPRF	4.58E-16	0.192223	0.22	0.131	1.41E-11	Vein	PTPRF
TSPAN3	4.65E-16	0.233855	0.492	0.409	1.43E-11	Vein	TSPAN3
MRPS21	4.67E-16	0.253526	0.696	0.644	1.43E-11	Vein	MRPS21
AC002398.2	4.69E-16	-0.124356	0.039	0.129	1.44E-11	Artery	AC002398.2
YIPF6	4.71E-16	-0.142896	0.323	0.481	1.45E-11	Artery	YIPF6
TP53I11	4.71E-16	0.31782	0.365	0.274	1.45E-11	Vein	TP53I11
TMEM245	4.89E-16	-0.187553	0.338	0.498	1.50E-11	Artery	TMEM245
FAM13B	4.89E-16	-0.168581	0.227	0.376	1.50E-11	Artery	FAM13B
CNOT8	4.90E-16	-0.124341	0.111	0.232	1.50E-11	Artery	CNOT8
BMPR2	4.96E-16	-0.189754	0.425	0.594	1.52E-11	Artery	BMPR2
SOCS4	5.03E-16	-0.148332	0.183	0.316	1.54E-11	Artery	SOCS4
TFRC	5.11E-16	-0.153696	0.134	0.255	1.57E-11	Artery	TFRC
FEZ1	5.15E-16	-0.112049	0.25	0.402	1.58E-11	Artery	FEZ1
GNAL	5.40E-16	-0.133287	0.162	0.294	1.66E-11	Artery	GNAL
FAM177A1	5.51E-16	-0.217342	0.554	0.693	1.69E-11	Artery	FAM177A1
C19orf53	5.56E-16	0.26424	0.727	0.693	1.71E-11	Vein	C19orf53
HNRNPUL1	6.05E-16	0.301877	0.589	0.544	1.86E-11	Vein	HNRNPUL1
SLC35A3	6.25E-16	-0.135095	0.156	0.287	1.92E-11	Artery	SLC35A3
TM9SF3	7.01E-16	-0.225335	0.573	0.725	2.16E-11	Artery	TM9SF3
C12orf29	7.30E-16	-0.101	0.142	0.272	2.24E-11	Artery	C12orf29
BLOC1S6	7.86E-16	-0.187334	0.384	0.542	2.42E-11	Artery	BLOC1S6
C4orf3	7.87E-16	-0.222673	0.777	0.829	2.42E-11	Artery	C4orf3
NDUFS7	8.08E-16	0.261949	0.521	0.457	2.48E-11	Vein	NDUFS7
FBXO42	8.25E-16	-0.13839	0.14	0.265	2.54E-11	Artery	FBXO42
HBP1	8.97E-16	-0.174148	0.386	0.545	2.76E-11	Artery	HBP1
SYDE1	9.00E-16	0.261655	0.397	0.317	2.77E-11	Vein	SYDE1
TMEM189	9.24E-16	-0.110449	0.105	0.223	2.84E-11	Artery	TMEM189
IQSEC1	9.71E-16	0.246934	0.451	0.367	2.98E-11	Vein	IQSEC1
CNIH1	1.08E-15	-0.148466	0.35	0.51	3.32E-11	Artery	CNIH1
PIM1	1.12E-15	-0.167443	0.132	0.254	3.44E-11	Artery	PIM1
PJA2	1.14E-15	-0.196618	0.801	0.877	3.49E-11	Artery	PJA2
PTP4A2	1.14E-15	-0.19553	0.578	0.718	3.50E-11	Artery	PTP4A2
METAP1	1.17E-15	-0.133831	0.157	0.285	3.58E-11	Artery	METAP1
GNAO1	1.18E-15	0.134446	0.124	0.058	3.62E-11	Vein	GNAO1
GLRX5	1.20E-15	0.254475	0.596	0.549	3.68E-11	Vein	GLRX5
SELENOW	1.23E-15	-0.260914	0.92	0.928	3.79E-11	Artery	SELENOW
GSTZ1	1.23E-15	0.104929	0.159	0.083	3.79E-11	Vein	GSTZ1
Z97200.1	1.26E-15	0.118434	0.109	0.048	3.86E-11	Vein	Z97200.1
MTR	1.26E-15	-0.175315	0.294	0.447	3.86E-11	Artery	MTR
NDUFB11	1.26E-15	0.24514	0.739	0.692	3.89E-11	Vein	NDUFB11
RHEB	1.29E-15	-0.186814	0.605	0.745	3.95E-11	Artery	RHEB
UPF2	1.34E-15	-0.135333	0.3	0.456	4.12E-11	Artery	UPF2
MAPK10	1.44E-15	0.103305	0.11	0.048	4.43E-11	Vein	MAPK10
TLN1	1.46E-15	-0.204571	0.954	0.966	4.48E-11	Artery	TLN1
DMPK	1.48E-15	0.303849	0.628	0.585	4.54E-11	Vein	DMPK
AP3S1	1.49E-15	-0.147231	0.392	0.562	4.57E-11	Artery	AP3S1
TXN	1.61E-15	-0.204616	0.749	0.803	4.95E-11	Artery	TXN
BBX	1.62E-15	-0.20358	0.566	0.718	4.98E-11	Artery	BBX
SNTB1	1.66E-15	0.211246	0.285	0.194	5.11E-11	Vein	SNTB1
HK2	1.70E-15	-0.103206	0.011	0.082	5.22E-11	Artery	HK2
GSE1	1.77E-15	-0.115174	0.057	0.155	5.44E-11	Artery	GSE1
PLIN2	1.81E-15	0.417553	0.363	0.271	5.58E-11	Vein	PLIN2
ACOT11	1.89E-15	-0.124897	0.066	0.169	5.81E-11	Artery	ACOT11
FKBP2	2.11E-15	-0.119119	0.149	0.277	6.48E-11	Artery	FKBP2
KPNA4	2.21E-15	-0.170404	0.445	0.609	6.79E-11	Artery	KPNA4
NDUFA11	2.29E-15	0.260587	0.771	0.725	7.05E-11	Vein	NDUFA11
LINC02381	2.34E-15	0.181978	0.497	0.408	7.19E-11	Vein	LINC02381
ZNF395	2.40E-15	-0.126829	0.131	0.257	7.38E-11	Artery	ZNF395
HUWE1	2.41E-15	-0.161809	0.409	0.572	7.41E-11	Artery	HUWE1
ZBTB47	2.50E-15	-0.115582	0.265	0.423	7.69E-11	Artery	ZBTB47
HIKESHI	2.54E-15	-0.153268	0.361	0.514	7.81E-11	Artery	HIKESHI
PGRMC2	2.54E-15	-0.143784	0.374	0.54	7.82E-11	Artery	PGRMC2
ZNFX1	2.59E-15	0.23264	0.308	0.216	7.97E-11	Vein	ZNFX1
RPL22L1	2.84E-15	0.309979	0.461	0.381	8.72E-11	Vein	RPL22L1
CEBPB	2.86E-15	-0.2926	0.834	0.894	8.81E-11	Artery	CEBPB
PPP1R14B	2.94E-15	-0.182098	0.644	0.762	9.04E-11	Artery	PPP1R14B
COL1A2	3.11E-15	-0.251188	0.81	0.886	9.56E-11	Artery	COL1A2
EMP2	3.34E-15	-0.194137	0.66	0.776	1.03E-10	Artery	EMP2
MMP24OS	3.35E-15	0.266349	0.522	0.452	1.03E-10	Vein	MMP24OS
SYPL1	3.62E-15	0.271465	0.682	0.64	1.11E-10	Vein	SYPL1
ZMIZ1	3.69E-15	0.15429	0.236	0.145	1.14E-10	Vein	ZMIZ1
PGLS	3.79E-15	0.260157	0.524	0.456	1.17E-10	Vein	PGLS
SIVA1	3.80E-15	-0.216373	0.698	0.781	1.17E-10	Artery	SIVA1
MAP3K12	3.86E-15	-0.101132	0.106	0.219	1.19E-10	Artery	MAP3K12
ATP6V1F	4.02E-15	0.2521	0.61	0.576	1.23E-10	Vein	ATP6V1F
SCML1	4.13E-15	-0.154868	0.24	0.385	1.27E-10	Artery	SCML1
ITPKB	4.29E-15	0.103583	0.124	0.058	1.32E-10	Vein	ITPKB
KLHL2	4.31E-15	-0.100289	0.06	0.158	1.33E-10	Artery	KLHL2
GABPB1-AS1	4.44E-15	0.213225	0.277	0.181	1.37E-10	Vein	GABPB1-AS1
PCDH11X	4.45E-15	-0.106989	0.003	0.067	1.37E-10	Artery	PCDH11X
CERK	4.52E-15	-0.110892	0.099	0.21	1.39E-10	Artery	CERK
CACNB3	4.55E-15	0.137983	0.124	0.059	1.40E-10	Vein	CACNB3
DDX3X	4.56E-15	0.224774	0.829	0.84	1.40E-10	Vein	DDX3X
GALNT15	4.65E-15	-0.147111	0.025	0.104	1.43E-10	Artery	GALNT15
[truncated: 1,520 more rows]

## Sheet: Data Set S4 (Fibro VeinvsArt)
	p_val	avg_log2FC	pct.1	pct.2	p_val_adj	direction	gene
RGS5	0	-1.0734	0.044	0.662	0	Artery	RGS5
PRG4	0	-1.6168	0.311	0.726	0	Artery	PRG4
ACTG2	0	-0.807618	0.149	0.663	0	Artery	ACTG2
MUSTN1	0	-0.882096	0.23	0.725	0	Artery	MUSTN1
MTRNR2L12	0	-1.7678	0.993	0.992	0	Artery	MTRNR2L12
SFRP2	0	-2.70679	0.7	0.908	0	Artery	SFRP2
SORBS2	0	-0.465079	0.05	0.391	0	Artery	SORBS2
PLN	0	-0.675774	0.024	0.468	0	Artery	PLN
TMEM176B	0	1.4037	0.75	0.375	0	Vein	TMEM176B
CLU	0	-1.68684	0.933	0.962	0	Artery	CLU
AC083967.1	0	-0.393378	0.005	0.259	0	Artery	AC083967.1
PLIN2	0	1.6439	0.945	0.808	0	Vein	PLIN2
TPM2	0	-1.64495	0.843	1	0	Artery	TPM2
OGN	0	-1.86141	0.787	0.904	0	Artery	OGN
ANGPTL2	0	0.931976	0.806	0.506	0	Vein	ANGPTL2
RPL12	0	0.57813	0.998	0.983	0	Vein	RPL12
ADIRF	0	-1.13064	0.738	0.979	0	Artery	ADIRF
ACTA2	0	-1.63669	0.589	0.958	0	Artery	ACTA2
EMX2OS	0	0.477401	0.491	0.047	0	Vein	EMX2OS
IFITM2	0	0.980895	0.977	0.894	0	Vein	IFITM2
IFITM3	0	0.829748	0.996	0.968	0	Vein	IFITM3
NNMT	0	0.810413	0.988	0.968	0	Vein	NNMT
TAGLN	0	-1.12189	0.895	0.999	0	Artery	TAGLN
MCAM	0	-0.470969	0.057	0.378	0	Artery	MCAM
HSP90B1	0	0.915875	0.97	0.891	0	Vein	HSP90B1
RPLP0	0	0.646545	0.995	0.971	0	Vein	RPLP0
RPS2	0	0.667872	0.998	0.985	0	Vein	RPS2
MYH11	0	-1.29454	0.155	0.806	0	Artery	MYH11
EIF4A1	0	0.704767	0.98	0.929	0	Vein	EIF4A1
RPL23A	0	-0.619391	0.993	0.988	0	Artery	RPL23A
RPL38	0	-0.643364	0.981	0.973	0	Artery	RPL38
C1QTNF1	0	1.27537	0.722	0.316	0	Vein	C1QTNF1
CNN1	0	-0.698892	0.07	0.55	0	Artery	CNN1
PPP1R14A	0	-1.09966	0.077	0.732	0	Artery	PPP1R14A
RPL18	0	0.553276	0.995	0.977	0	Vein	RPL18
RPS9	0	0.692186	0.996	0.972	0	Vein	RPS9
RPL28	0	0.681816	0.999	0.975	0	Vein	RPL28
MIF	0	0.738424	0.971	0.891	0	Vein	MIF
GGT5	0	0.971572	0.836	0.467	0	Vein	GGT5
RPL3	0	0.647923	0.996	0.988	0	Vein	RPL3
SLC25A6	0	0.751085	0.966	0.885	0	Vein	SLC25A6
MTRNR2L10	0	-0.30342	0.069	0.404	0	Artery	MTRNR2L10
MT-ND3	0	-1.39802	0.998	0.997	0	Artery	MT-ND3
MT-ND4L	0	-0.938562	0.931	0.943	0	Artery	MT-ND4L
TMEM176A	4.63031190246861e-306	1.1644	0.732	0.361	1.42312636322373e-301	Vein	TMEM176A
MTRNR2L1	1.13517542021481e-305	-0.690181	0.058	0.366	3.48896165403021e-301	Artery	MTRNR2L1
CEBPD	1.41471369866923e-299	0.765819	0.995	0.944	4.34812255285989e-295	Vein	CEBPD
CSRP1	2.25866957691086e-297	-0.756941	0.444	0.805	6.94202094463553e-293	Artery	CSRP1
PNRC1	8.96693954314184e-297	0.752605	0.991	0.95	2.75598886858464e-292	Vein	PNRC1
MTRNR2L8	8.78208957942616e-296	-0.927269	0.845	0.898	2.69917523223663e-291	Artery	MTRNR2L8
SCRG1	6.26523546865008e-295	-0.841471	0.175	0.534	1.9256201212896e-290	Artery	SCRG1
ACTC1	3.3197684459219e-290	-0.270021	0.017	0.262	1.02033083185409e-285	Artery	ACTC1
GAPDH	7.71328790423055e-288	0.769512	0.983	0.934	2.37067903736526e-283	Vein	GAPDH
FN1	1.08515181836331e-284	-1.10323	0.845	0.946	3.33521411373964e-280	Artery	FN1
RPL13A	1.1192524328439e-283	0.550835	0.998	0.99	3.44002235234571e-279	Vein	RPL13A
BMPR1B	2.19002737762688e-281	-0.288337	0.05	0.338	6.73104914513623e-277	Artery	BMPR1B
DSTN	2.71124880941811e-274	-0.652512	0.983	0.994	8.33302321574655e-270	Artery	DSTN
DES	6.01901000416992e-274	-0.571575	0.16	0.531	1.84994272478162e-269	Artery	DES
NTNG1	2.82179396437406e-267	-0.255296	0.043	0.311	8.67278374950368e-263	Artery	NTNG1
RPL18A	4.90029670101156e-267	0.53951	0.997	0.983	1.5061061910559e-262	Vein	RPL18A
IL1R1	1.85205370217899e-265	0.719941	0.942	0.858	5.69228705364714e-261	Vein	IL1R1
H19	4.65665276068557e-265	-1.33449	0.307	0.664	1.43122222599671e-260	Artery	H19
RPS15	1.1743837011662e-263	0.45302	0.997	0.975	3.60946830553432e-259	Vein	RPS15
COMMD6	2.82649663890073e-259	-0.62298	0.902	0.894	8.6872374196614e-255	Artery	COMMD6
RPS5	1.3343439255869e-256	0.550702	0.985	0.958	4.10110605529133e-252	Vein	RPS5
FGF7	7.31194625178801e-256	1.01786	0.952	0.881	2.24732668048705e-251	Vein	FGF7
IFITM1	1.10923476172374e-252	-0.707361	0.451	0.72	3.40923304015793e-248	Artery	IFITM1
KLF9	6.90825774688764e-252	0.612206	0.972	0.887	2.12325301850592e-247	Vein	KLF9
PPIA	3.39890688627688e-251	0.526732	0.974	0.9	1.0446540314972e-246	Vein	PPIA
COL11A1	2.61110273102792e-250	-0.428118	0.025	0.253	8.02522424381431e-246	Artery	COL11A1
SPOCK1	1.5575399429304e-249	0.663915	0.932	0.813	4.78709901459659e-245	Vein	SPOCK1
SOD2	5.16982810765683e-249	0.714246	0.994	0.956	1.58894666888833e-244	Vein	SOD2
OMD	6.2283172149683e-248	-0.960742	0.439	0.726	1.91427329602051e-243	Artery	OMD
TC2N	9.81280170631504e-246	0.457991	0.598	0.204	3.01596460443593e-241	Vein	TC2N
RPS16	4.58381621310573e-242	0.443989	0.993	0.973	1.40883591309805e-237	Vein	RPS16
HBB	1.18483572387174e-241	-0.724073	0.062	0.343	3.64159259731978e-237	Artery	HBB
APCDD1L-DT	1.797465132733e-240	-0.3081	0.05	0.304	5.52450908545487e-236	Artery	APCDD1L-DT
TPM4	2.01091485017773e-240	1.02508	0.941	0.882	6.18054679202127e-236	Vein	TPM4
CPE	4.29914797366313e-238	-0.93361	0.66	0.883	1.32134312970536e-233	Artery	CPE
AKR1C3	1.42448882511117e-237	0.913783	0.729	0.512	4.37816640397919e-233	Vein	AKR1C3
RBM3	3.46829581336069e-235	0.553132	0.93	0.789	1.06598071823641e-230	Vein	RBM3
C12orf75	6.2300513274552e-235	-0.460553	0.153	0.472	1.91480627549336e-230	Artery	C12orf75
CCDC80	1.1356753515936e-233	1.09547	0.975	0.916	3.49049819312293e-229	Vein	CCDC80
FOXD1	1.10734150281273e-230	-0.251636	0.092	0.398	3.40341410889492e-226	Artery	FOXD1
MAPK10	3.78643050664808e-230	-0.230286	0.038	0.275	1.16375941621829e-225	Artery	MAPK10
CRISPLD1	2.55483699767431e-225	-0.433498	0.107	0.399	7.85229151235198e-221	Artery	CRISPLD1
PPIC	8.39368989920022e-225	-0.957216	0.617	0.759	2.57980059051919e-220	Artery	PPIC
MRPL23	8.37856906419753e-219	0.372334	0.49	0.133	2.57515320188111e-214	Vein	MRPL23
DEFB1	2.44065642199632e-218	-0.199871	0.004	0.17	7.50135751300567e-214	Artery	DEFB1
GYPC	1.58303721363843e-216	0.638337	0.887	0.748	4.8654648761177e-212	Vein	GYPC
RAMP1	6.77038498229957e-216	-0.283685	0.041	0.271	2.08087782430977e-211	Artery	RAMP1
STEAP4	1.00530288348653e-213	1.1509	0.666	0.364	3.08979841239584e-209	Vein	STEAP4
KLF13	2.79965772007144e-213	0.558403	0.849	0.659	8.60474800263957e-209	Vein	KLF13
RPSA	6.47611844437195e-213	0.515276	0.98	0.932	1.99043500387772e-208	Vein	RPSA
APCDD1L	1.98938478278299e-212	-0.138521	0.019	0.213	6.11437412988351e-208	Artery	APCDD1L
CHL1	1.03220396777448e-206	0.583389	0.438	0.103	3.17247889495486e-202	Vein	CHL1
HLA-A	1.81385269573327e-205	0.563853	0.977	0.922	5.57487626033622e-201	Vein	HLA-A
RPL29	2.52330882997703e-205	0.427853	0.995	0.968	7.75538968893439e-201	Vein	RPL29
NEAT1	6.33351450741401e-205	0.289946	0.992	0.944	1.9466056838537e-200	Vein	NEAT1
EIF5A	1.08372338539998e-204	0.513766	0.87	0.72	3.33082382502683e-200	Vein	EIF5A
AKR1C1	7.30240067483314e-203	0.810553	0.867	0.742	2.24439284740997e-198	Vein	AKR1C1
EEF2	1.8282762142375e-202	0.417	0.982	0.947	5.61920694445897e-198	Vein	EEF2
RPS12	4.88594071376341e-201	0.412421	0.999	0.991	1.50169387837519e-196	Vein	RPS12
CCN2	1.66425282839919e-200	-1.32794	0.718	0.862	5.11508106808492e-196	Artery	CCN2
ELANE	1.27939131827867e-199	0.38722	0.375	0.061	3.93220921672948e-195	Vein	ELANE
PDLIM1	2.35317562024844e-199	0.543252	0.889	0.755	7.23248526883357e-195	Vein	PDLIM1
EGFR	2.3165084490853e-198	0.544993	0.834	0.65	7.11978871826368e-194	Vein	EGFR
DKK3	4.81634644288453e-197	-0.422627	0.103	0.373	1.48030407922056e-192	Artery	DKK3
PDE4D	8.73020860064637e-197	0.503641	0.736	0.434	2.68322961340866e-192	Vein	PDE4D
FAM118A	1.73480232737185e-196	-0.481632	0.26	0.562	5.33191495317737e-192	Artery	FAM118A
ANKRD65	1.85169474925944e-194	-0.193518	0.082	0.34	5.6911838118489e-190	Artery	ANKRD65
CCN3	2.10470817894944e-193	-0.475072	0.142	0.44	6.46882058800109e-189	Artery	CCN3
RPL10A	3.82405716482031e-193	0.397186	0.994	0.978	1.17532396960752e-188	Vein	RPL10A
OST4	7.27288242781638e-193	-0.521489	0.947	0.909	2.23532041418937e-188	Artery	OST4
TWIST1	1.28838524127e-192	0.775384	0.629	0.336	3.95985203904334e-188	Vein	TWIST1
PPIB	4.18520231727733e-191	0.612596	0.974	0.912	1.28632193221519e-186	Vein	PPIB
RPS29	4.8163832750678e-190	-0.521791	0.988	0.98	1.48031539959209e-185	Artery	RPS29
GLUL	1.16034881979504e-187	0.824371	0.943	0.842	3.56633209764005e-183	Vein	GLUL
RPS27	1.6282928388116e-187	-0.433419	0.998	0.995	5.00455804008744e-183	Artery	RPS27
RPL15	5.41409863911304e-186	0.37688	0.995	0.978	1.66402321673139e-181	Vein	RPL15
PPP1CB	1.31207948073431e-184	-0.630084	0.647	0.83	4.03267628403691e-180	Artery	PPP1CB
FOXC1	8.98292870166837e-184	-0.532174	0.38	0.684	2.76090313645777e-179	Artery	FOXC1
SNHG5	4.62695107470479e-183	0.509293	0.953	0.885	1.42209341281052e-178	Vein	SNHG5
RPS8	6.68597658995374e-183	0.395599	0.998	0.982	2.05493490492228e-178	Vein	RPS8
NFIL3	1.07155635133565e-182	0.521961	0.911	0.754	3.29342844583013e-178	Vein	NFIL3
MEOX2	1.70704391350855e-182	-0.497444	0.262	0.563	5.24659946816854e-178	Artery	MEOX2
ERAP2	2.27291936167719e-181	-0.186939	0.089	0.348	6.98581765811485e-177	Artery	ERAP2
APOC1	2.38552605241561e-181	1.15029	0.49	0.182	7.33191432209937e-177	Vein	APOC1
REV3L	1.13900800876131e-180	0.5841	0.9	0.778	3.5007411149279e-176	Vein	REV3L
LRRC32	1.45168754208417e-180	0.526162	0.579	0.291	4.46176166059571e-176	Vein	LRRC32
RASD1	6.73976720609427e-180	0.860747	0.716	0.438	2.07146745079307e-175	Vein	RASD1
PCDH7	1.59853186540774e-177	-0.204024	0.05	0.262	4.91308768833069e-173	Artery	PCDH7
LTC4S	1.83818997858685e-176	-0.34431	0.131	0.398	5.6496768991867e-172	Artery	LTC4S
MT-ATP8	2.86860288804784e-175	-0.549558	0.797	0.869	8.81665097641503e-171	Artery	MT-ATP8
CRIP1	3.69841133158555e-175	-0.704434	0.687	0.861	1.13670672276282e-170	Artery	CRIP1
IGFBP6	4.16302363295897e-175	-0.809856	0.869	0.945	1.27950531358994e-170	Artery	IGFBP6
FTH1	2.86262648185622e-174	0.354621	1	0.997	8.79828249198509e-170	Vein	FTH1
HNRNPD	7.11202999138508e-174	0.418065	0.87	0.719	2.18588241785221e-169	Vein	HNRNPD
RPS7	2.46050216289541e-173	0.362879	0.994	0.967	7.56235339765903e-169	Vein	RPS7
FHL5	5.10257786517518e-173	-0.22757	0.01	0.159	1.56827730686159e-168	Artery	FHL5
SSR4	1.14960701285825e-172	0.527039	0.955	0.889	3.53331715401984e-168	Vein	SSR4
ZFP36	1.75677966512078e-172	-0.832476	0.935	0.931	5.39946230074871e-168	Artery	ZFP36
H2AFJ	3.83212835669571e-172	0.475392	0.95	0.856	1.17780465043043e-167	Vein	H2AFJ
LTBP3	8.86567062967665e-172	-0.572818	0.683	0.83	2.72486386803112e-167	Artery	LTBP3
TAGLN2	7.61197842238259e-171	0.533322	0.906	0.8	2.33954156811929e-166	Vein	TAGLN2
TWIST2	1.3455341463853e-170	0.554536	0.803	0.638	4.13549919891522e-166	Vein	TWIST2
DEPP1	2.80033480731999e-170	1.14531	0.721	0.457	8.606829030298e-166	Vein	DEPP1
SNRPB	8.45652108439274e-170	0.439644	0.818	0.651	2.59911175528811e-165	Vein	SNRPB
AC004556.3	1.15570759531868e-168	-0.134025	0.037	0.228	3.55206729421197e-164	Artery	AC004556.3
RPL19	1.61042233106878e-168	0.332632	0.998	0.986	4.9496330345399e-164	Vein	RPL19
ASPN	8.54948168760094e-168	-1.04213	0.229	0.498	2.62768319668415e-163	Artery	ASPN
THNSL2	7.4531852933438e-166	-0.150505	0.06	0.276	2.29073649990922e-161	Artery	THNSL2
IGFBP2	1.66315850890184e-165	-0.291338	0.096	0.345	5.1117176771098e-161	Artery	IGFBP2
SRPX	6.15826500536966e-165	0.522924	0.914	0.783	1.89274274940036e-160	Vein	SRPX
CKB	2.46936533909279e-164	-0.737565	0.452	0.711	7.58959436970169e-160	Artery	CKB
C19orf53	3.94823601175005e-164	0.425097	0.922	0.826	1.21349033821138e-159	Vein	C19orf53
EYA4	3.50161486909949e-163	-0.139991	0.037	0.225	1.07622133001773e-158	Artery	EYA4
SCAND1	1.61582321182255e-162	0.412234	0.842	0.704	4.96623264153661e-158	Vein	SCAND1
LUM	1.41883554675596e-161	-1.34517	0.944	0.885	4.36079105295444e-157	Artery	LUM
TMA7	1.07906384878272e-160	-0.38063	0.948	0.918	3.31650273923369e-156	Artery	TMA7
VEGFA	1.23387058362568e-158	0.764524	0.775	0.602	3.79230123877352e-154	Vein	VEGFA
RPL13	3.21746284506797e-158	0.333514	1	0.996	9.8888720543164e-154	Vein	RPL13
OGFRL1	8.63971328173422e-158	0.39531	0.581	0.308	2.65541587714101e-153	Vein	OGFRL1
METRNL	2.40311771734029e-157	0.603755	0.83	0.705	7.38598230424539e-153	Vein	METRNL
TPI1	4.3555401794126e-157	0.491529	0.92	0.824	1.33867527414246e-152	Vein	TPI1
MFAP4	9.33617242886348e-155	-0.850429	0.825	0.85	2.86947259601119e-150	Artery	MFAP4
DUSP23	1.01901753388479e-154	0.43303	0.587	0.343	3.13195039039491e-150	Vein	DUSP23
IFIT1	6.79679151265441e-154	-0.283129	0.146	0.402	2.08899387141433e-149	Artery	IFIT1
NME2	8.85160873040462e-154	0.400192	0.983	0.923	2.72054194328986e-149	Vein	NME2
SAT1	9.86316846909099e-154	0.443204	0.98	0.923	3.03144482897512e-149	Vein	SAT1
KLF4	2.92613577170892e-153	-0.753754	0.8	0.867	8.99347829434735e-149	Artery	KLF4
BX284668.5	6.86408190098482e-153	-0.207755	0.14	0.398	2.10967557226768e-148	Artery	BX284668.5
GSTO1	5.07538870677941e-152	0.42858	0.895	0.79	1.55992071902865e-147	Vein	GSTO1
AC093627.6	6.15411619109167e-152	0.218069	0.256	0.015	1.89146761133202e-147	Vein	AC093627.6
PRDM6	7.67117899364724e-152	-0.197421	0.088	0.312	2.35773686369748e-147	Artery	PRDM6
PIM3	1.62544017536306e-151	0.413572	0.639	0.381	4.99579037897835e-147	Vein	PIM3
LHFPL6	4.4553759375463e-151	0.535949	0.945	0.814	1.36935979440486e-146	Vein	LHFPL6
C1orf54	7.97078861678722e-151	-0.326532	0.323	0.603	2.44982188136955e-146	Artery	C1orf54
EMX2	1.23552105428349e-150	0.276325	0.306	0.05	3.7973739603403e-146	Vein	EMX2
CHODL	1.76113273218155e-150	-0.138139	0.003	0.117	5.41284145235998e-146	Artery	CHODL
MT-CO3	8.21287467492968e-150	0.444622	1	0.997	2.52422703133964e-145	Vein	MT-CO3
LBP	1.10247759310732e-149	0.937167	0.381	0.108	3.38846488241535e-145	Vein	LBP
SMIM3	5.94870271464668e-149	0.427289	0.578	0.327	1.82833377934666e-144	Vein	SMIM3
BACE2	1.07674867228923e-148	-0.487215	0.449	0.686	3.30938704428094e-144	Artery	BACE2
KCNK2	1.75526538250896e-148	-0.156822	0.037	0.211	5.39480815314128e-144	Artery	KCNK2
RPLP1	3.24272024329426e-148	0.273833	0.999	0.999	9.96650066776491e-144	Vein	RPLP1
PHC2	3.69417414143724e-148	0.40067	0.757	0.556	1.13540442237073e-143	Vein	PHC2
SSC5D	5.76095637074538e-148	-0.350207	0.243	0.506	1.77062994054859e-143	Artery	SSC5D
SASH1	1.28607116009517e-147	0.481558	0.831	0.675	3.95273971055251e-143	Vein	SASH1
ATP5F1E	3.4524948184127e-147	-0.390786	0.973	0.952	1.06112428243914e-142	Artery	ATP5F1E
CTSL	5.579235627456e-147	0.551185	0.922	0.83	1.7147780700986e-142	Vein	CTSL
RPS3	7.08724637230626e-147	0.389547	0.991	0.973	2.17826517252833e-142	Vein	RPS3
PDIA3	5.89363913577641e-146	0.517916	0.943	0.868	1.81140998838088e-141	Vein	PDIA3
TNFSF10	7.28103895479298e-146	0.600947	0.78	0.575	2.23782732275562e-141	Vein	TNFSF10
HNRNPAB	1.81087737846057e-145	0.50756	0.84	0.712	5.56573162269857e-141	Vein	HNRNPAB
CTSA	7.79879825708653e-145	0.519089	0.837	0.677	2.39696064431554e-140	Vein	CTSA
GSN	3.27808880199643e-144	-1.03909	0.994	0.987	1.0075205932936e-139	Artery	GSN
COL6A3	5.17373943834566e-144	0.727847	0.979	0.921	1.59014881637554e-139	Vein	COL6A3
C16orf89	1.25324681165278e-143	-0.374015	0.12	0.347	3.85185407561483e-139	Artery	C16orf89
EEF1G	3.53171330806691e-142	0.377237	0.979	0.947	1.08547208523437e-137	Vein	EEF1G
SULF1	7.87462955317108e-142	-0.530649	0.322	0.584	2.42026739316713e-137	Artery	SULF1
CFL1	2.3878840467687e-140	0.457409	0.956	0.887	7.3391616177436e-136	Vein	CFL1
EIF3E	3.65994392562032e-140	-0.462953	0.916	0.9	1.1248837655394e-135	Artery	EIF3E
MEST	7.1250634565154e-140	-0.175636	0.034	0.196	2.18988825336001e-135	Artery	MEST
GADD45A	1.38695619620522e-139	0.83871	0.849	0.715	4.26280986903673e-135	Vein	GADD45A
CFD	1.70936483892145e-139	0.605202	0.984	0.936	5.25373283242508e-135	Vein	CFD
SOX9	1.99378636138705e-139	-0.188197	0.067	0.266	6.12790238172311e-135	Artery	SOX9
TCEA3	3.70461413272041e-139	-0.27866	0.175	0.424	1.13861315369162e-134	Artery	TCEA3
NID2	5.70948543737332e-138	0.486205	0.603	0.39	1.75481034917669e-133	Vein	NID2
IPO5	6.82704848717438e-138	0.461809	0.698	0.509	2.09829335253305e-133	Vein	IPO5
FZD1	9.24253804282296e-138	-0.289463	0.247	0.506	2.84069406746164e-133	Artery	FZD1
TMEM243	5.89626983469816e-137	-0.268896	0.284	0.55	1.81221853369448e-132	Artery	TMEM243
AC016876.1	1.20547127275287e-136	-0.181657	0.109	0.336	3.70501595680595e-132	Artery	AC016876.1
RPL35	2.2920686935978e-135	0.295276	0.994	0.979	7.04467312977285e-131	Vein	RPL35
CALR	1.53270069371803e-134	0.616705	0.928	0.852	4.71075558214237e-130	Vein	CALR
ATP5ME	2.30194973464077e-134	-0.399477	0.872	0.875	7.07504250941841e-130	Artery	ATP5ME
INHBB	1.68540852919481e-133	0.326225	0.249	0.026	5.18010311448024e-129	Vein	INHBB
PPP1R15A	2.2052723128189e-133	0.56183	0.963	0.874	6.7779044534489e-129	Vein	PPP1R15A
ETS1	2.5050279130879e-133	0.462086	0.638	0.439	7.69920329087566e-129	Vein	ETS1
PTHLH	4.7311004225023e-133	-0.163331	0.036	0.196	1.45410371485608e-128	Artery	PTHLH
LPAR1	6.82062644544533e-133	0.368865	0.816	0.661	2.09631953800762e-128	Vein	LPAR1
ECRG4	7.67835240252025e-133	-0.115775	0.023	0.167	2.3599416109146e-128	Artery	ECRG4
GNAS	1.00993915802535e-132	-0.38146	0.979	0.952	3.10404800219092e-128	Artery	GNAS
CD63	1.92214304475293e-132	0.462233	0.996	0.979	5.90770664804814e-128	Vein	CD63
P4HB	1.67260461998235e-131	0.505538	0.931	0.847	5.14075029951575e-127	Vein	P4HB
LINC01139	5.66529439883173e-131	-0.101511	0.025	0.168	1.74122823348093e-126	Artery	LINC01139
NTM	6.46984044602653e-131	-0.244591	0.118	0.342	1.98850546108625e-126	Artery	NTM
KCNE4	1.05851245803321e-130	0.894524	0.787	0.664	3.25333803976507e-126	Vein	KCNE4
CDO1	1.48148217363492e-130	-0.263144	0.23	0.491	4.55333546066692e-126	Artery	CDO1
CDV3	2.25595277326008e-130	0.364587	0.885	0.765	6.93367084861485e-126	Vein	CDV3
GSTM3	3.68072230548314e-130	0.435923	0.85	0.7	1.13127000059024e-125	Vein	GSTM3
KRT27	1.1458010230214e-129	-0.113146	0.009	0.125	3.52161944425628e-125	Artery	KRT27
DNASE1L3	9.3745777669977e-129	0.405815	0.221	0.012	2.88127647668674e-124	Vein	DNASE1L3
PSMD8	6.30237899525568e-128	0.359006	0.87	0.751	1.93703618419183e-123	Vein	PSMD8
KIAA0040	1.28663701902313e-127	0.299414	0.363	0.112	3.95447887796759e-123	Vein	KIAA0040
CYP1B1	7.15058288195185e-127	-0.588094	0.481	0.719	2.1977316487679e-122	Artery	CYP1B1
BCL3	9.35041016479872e-127	0.356685	0.56	0.333	2.87384856415089e-122	Vein	BCL3
EIF3K	9.92787559349096e-127	0.340188	0.934	0.857	3.05133256365945e-122	Vein	EIF3K
SERBP1	1.02869118465948e-126	0.380124	0.936	0.872	3.1616823560509e-122	Vein	SERBP1
APOE	2.61203605104443e-126	1.91259	0.567	0.332	8.02809280288505e-122	Vein	APOE
RAN	4.41761839782531e-126	0.408087	0.899	0.793	1.35775501457161e-121	Vein	RAN
EMILIN2	3.49645201500654e-125	0.442496	0.662	0.472	1.07463452681226e-120	Vein	EMILIN2
CD9	8.99230874521464e-125	-0.744902	0.65	0.784	2.76378609284172e-120	Artery	CD9
RNASEH2C	1.48265353246078e-124	0.372234	0.846	0.727	4.55693563201821e-120	Vein	RNASEH2C
SMAD9	1.82818444992071e-124	-0.225147	0.157	0.393	5.61892490683129e-120	Artery	SMAD9
VAMP2	3.59820015035098e-124	0.346848	0.82	0.665	1.10590681621037e-119	Vein	VAMP2
PDIA6	4.57160965065838e-124	0.540221	0.88	0.805	1.40508422612985e-119	Vein	PDIA6
IL17D	5.9008648715074e-124	-0.282738	0.224	0.471	1.8136308182578e-119	Artery	IL17D
LEPROT	1.0192776339578e-123	0.355942	0.936	0.84	3.1327498079693e-119	Vein	LEPROT
SEMA3C	1.83261688234126e-123	-0.661324	0.366	0.599	5.63254798787585e-119	Artery	SEMA3C
RNF152	2.02706573590897e-122	0.345862	0.332	0.092	6.23018653931623e-118	Vein	RNF152
MAP3K8	4.22555408149676e-122	0.379545	0.719	0.537	1.29872404694803e-117	Vein	MAP3K8
WTAP	1.4318665707822e-121	0.444341	0.82	0.691	4.40084190529908e-117	Vein	WTAP
TRPS1	2.53255003192933e-121	-0.41644	0.321	0.576	7.78379252313479e-117	Artery	TRPS1
IGF2	7.2488803598602e-121	-0.397826	0.116	0.318	2.22794337860303e-116	Artery	IGF2
MMP23B	1.23816246594974e-120	-0.572372	0.415	0.63	3.80549233909654e-116	Artery	MMP23B
MEDAG	1.78438443609681e-120	0.343585	0.898	0.771	5.48430556434355e-116	Vein	MEDAG
RPL7A	4.3648208370798e-120	0.304572	0.997	0.981	1.34152768427648e-115	Vein	RPL7A
SERPING1	1.51741770484426e-119	0.356122	0.996	0.955	4.66378331583884e-115	Vein	SERPING1
AP2M1	3.05929548742084e-119	0.372413	0.866	0.757	9.40274468058795e-115	Vein	AP2M1
HMCN2	3.26006614073805e-119	0.29666	0.432	0.173	1.00198132835584e-114	Vein	HMCN2
AC132217.1	5.2790475556046e-119	-0.110016	0.024	0.156	1.62251526621507e-114	Artery	AC132217.1
HIF1A	1.87977658157109e-118	0.664292	0.782	0.658	5.77749332345873e-114	Vein	HIF1A
FAIM2	6.3878331852084e-118	-0.202693	0.068	0.244	1.9633005294738e-113	Artery	FAIM2
ADAMTS6	1.87325470615462e-117	-0.122222	0.022	0.15	5.75744833936621e-113	Artery	ADAMTS6
TPM1	2.21232336966035e-117	-0.525843	0.878	0.959	6.79957587665107e-113	Artery	TPM1
IRX3	4.98815994463753e-117	0.385788	0.506	0.262	1.53311095898434e-112	Vein	IRX3
IFI27	9.07207553382145e-117	0.777194	0.412	0.173	2.78830241532002e-112	Vein	IFI27
PHGDH	3.27201288595497e-116	-0.384349	0.44	0.683	1.00565316049826e-111	Artery	PHGDH
YWHAB	7.00761710614194e-115	0.356986	0.93	0.848	2.15379111757272e-110	Vein	YWHAB
AOPEP	7.75381336970995e-115	-0.342246	0.307	0.558	2.38313453918035e-110	Artery	AOPEP
APRT	1.46609668221644e-114	0.36566	0.889	0.783	4.50604815279223e-110	Vein	APRT
RPS19	2.14811594618229e-114	0.294963	0.997	0.978	6.60223436059125e-110	Vein	RPS19
TNNT3	3.60640844301046e-114	-0.349623	0.26	0.511	1.10842963495926e-109	Artery	TNNT3
ANXA1	4.39958294358492e-114	-0.487914	0.971	0.95	1.35221181771083e-109	Artery	ANXA1
PTX3	4.66428190126031e-114	1.53224	0.626	0.436	1.43356704235236e-109	Vein	PTX3
DAB2	5.4425402623507e-114	0.390209	0.921	0.834	1.67276474963349e-109	Vein	DAB2
YBX1	1.3740481478007e-113	0.316592	0.975	0.935	4.22313698226544e-109	Vein	YBX1
CD59	1.6485640382747e-113	0.429149	0.955	0.875	5.0668615716373e-109	Vein	CD59
GXYLT2	1.75660979094749e-113	-0.31135	0.318	0.555	5.39894019247711e-109	Artery	GXYLT2
SPSB1	1.80635387157805e-113	0.437382	0.672	0.502	5.55182862429515e-109	Vein	SPSB1
POR	5.79082212920788e-113	0.326688	0.595	0.403	1.77980918141204e-108	Vein	POR
C1QTNF3	5.33319012434057e-112	-0.399799	0.116	0.308	1.63915598471607e-107	Artery	C1QTNF3
HNRNPH1	6.09980643941668e-112	-0.550707	0.701	0.837	1.87477550915472e-107	Artery	HNRNPH1
HBA2	1.24315543177104e-111	-0.201298	0.013	0.124	3.82083821954831e-107	Artery	HBA2
RPL11	1.99342369162323e-111	0.264254	0.999	0.988	6.126787716204e-107	Vein	RPL11
MT-ND2	8.50659220855979e-111	-0.427913	0.998	0.991	2.61450111530085e-106	Artery	MT-ND2
FBLN1	1.01457104886296e-110	-0.77326	0.986	0.979	3.1182841186803e-106	Artery	FBLN1
RPL6	2.41570872913002e-110	0.271239	0.999	0.981	7.42468077898111e-106	Vein	RPL6
ABCC2	4.73134559140453e-110	-0.285291	0.106	0.296	1.45417906751818e-105	Artery	ABCC2
MGLL	5.72290776705964e-110	0.358367	0.495	0.275	1.75893570220578e-105	Vein	MGLL
KRT222	9.97883147952794e-110	-0.26815	0.127	0.33	3.06699385523291e-105	Artery	KRT222
IL18	1.97093135816598e-109	-0.250894	0.071	0.242	6.05765752932313e-105	Artery	IL18
CD44	2.03184114643139e-109	0.40895	0.934	0.871	6.24486376355688e-105	Vein	CD44
IGSF10	2.76343542397987e-109	0.383455	0.377	0.144	8.49341877560212e-105	Vein	IGSF10
GPC6	3.28495648629542e-109	-0.354947	0.387	0.627	1.0096313760629e-104	Artery	GPC6
SIX1	3.85511732900059e-109	-0.353597	0.282	0.513	1.18487031106833e-104	Artery	SIX1
CDC42EP4	4.9266895758401e-109	0.405672	0.672	0.474	1.51421804113445e-104	Vein	CDC42EP4
FHL1	5.97026893374658e-109	-0.401839	0.725	0.863	1.83496215678701e-104	Artery	FHL1
C1QTNF7	7.11518409288202e-109	-0.337899	0.235	0.466	2.18685183094729e-104	Artery	C1QTNF7
COX4I1	8.4601720112315e-109	0.30697	0.964	0.894	2.600233867652e-104	Vein	COX4I1
NACA	8.63800132330328e-109	0.252112	0.995	0.974	2.65488970671726e-104	Vein	NACA
HOXC9	1.03239290281343e-108	0.17928	0.207	0.019	3.17305958679708e-104	Vein	HOXC9
FUCA2	1.97974914995018e-108	0.335769	0.686	0.533	6.08475901237188e-104	Vein	FUCA2
SH3PXD2B	3.17554098750038e-108	0.319227	0.703	0.508	9.76002522508241e-104	Vein	SH3PXD2B
UBC	1.28489088403856e-107	0.418487	0.995	0.977	3.94911213209251e-103	Vein	UBC
PRRT2	1.3648080367595e-107	-0.191802	0.06	0.221	4.19473750098033e-103	Artery	PRRT2
ZNF593	1.39139043094552e-107	0.304419	0.633	0.454	4.27643848951105e-103	Vein	ZNF593
RPS11	1.88659689905933e-107	0.288736	0.993	0.979	5.79845556925886e-103	Vein	RPS11
ARF5	1.48587349306135e-106	-0.36432	0.567	0.709	4.56683218092407e-102	Artery	ARF5
JAK1	1.67329751332057e-106	0.358222	0.945	0.881	5.14287990719078e-102	Vein	JAK1
CANX	2.07297446676456e-106	0.286777	0.919	0.842	6.37128702360086e-102	Vein	CANX
RPS27L	4.08162322369884e-106	-0.500057	0.903	0.898	1.25448689780384e-101	Artery	RPS27L
DIO3	4.97850860400709e-106	0.696692	0.356	0.14	1.53014461944158e-101	Vein	DIO3
SULF2	5.07794712894511e-106	-0.290335	0.205	0.422	1.56070705008128e-101	Artery	SULF2
RPS14	5.27618217297637e-106	0.263232	0.995	0.983	1.62163459086429e-101	Vein	RPS14
LAMC1	8.4329247451313e-106	0.440882	0.891	0.794	2.5918594204161e-101	Vein	LAMC1
DDB2	9.7683096529612e-106	-0.227712	0.146	0.351	3.00228997183762e-101	Artery	DDB2
FBL	1.82264836978605e-105	0.280261	0.67	0.497	5.60190976453742e-101	Vein	FBL
PFKFB3	2.05853252578973e-105	0.426454	0.525	0.315	6.32689971801474e-101	Vein	PFKFB3
CNOT8	2.86624335544888e-105	0.302549	0.597	0.381	8.80939895297213e-101	Vein	CNOT8
PSMB1	8.40758969444333e-105	0.271813	0.936	0.852	2.58407269258716e-100	Vein	PSMB1
PSMB3	1.19542202426632e-104	0.32561	0.807	0.691	3.67412959158252e-100	Vein	PSMB3
AP2S1	1.29718730047828e-104	0.362746	0.852	0.74	3.98690516801998e-100	Vein	AP2S1
HNRNPM	3.9793698172986e-104	0.319102	0.789	0.652	1.22305931334673e-99	Vein	HNRNPM
H3F3B	5.13210029896053e-104	0.322573	0.996	0.972	1.57735102688552e-99	Vein	H3F3B
ATP5F1D	9.35233159151637e-104	0.310905	0.931	0.845	2.87443911465256e-99	Vein	ATP5F1D
GAS1	1.0181697629257e-103	-0.654348	0.755	0.837	3.12934476635213e-99	Artery	GAS1
HSP90AB1	1.00590359652295e-102	0.507952	0.985	0.949	3.09164470391329e-98	Vein	HSP90AB1
RBM8A	1.64255733251692e-102	0.306765	0.822	0.694	5.04839996149076e-98	Vein	RBM8A
TMEM119	1.64524573886701e-102	0.550882	0.633	0.445	5.05666277840777e-98	Vein	TMEM119
FLNB	3.36590922163409e-102	-0.191169	0.113	0.304	1.03451219926924e-97	Artery	FLNB
PDIA4	3.46452481612027e-102	0.360047	0.658	0.501	1.06482170223457e-97	Vein	PDIA4
ABL1	4.16224787624522e-102	0.150326	0.746	0.568	1.27926688476397e-97	Vein	ABL1
HAS1	4.46529174549472e-102	0.801198	0.393	0.178	1.3724074179778e-97	Vein	HAS1
IFI44	5.027287264334e-102	-0.13067	0.083	0.258	1.54513674069305e-97	Artery	IFI44
ERRFI1	2.07873438529986e-101	0.470237	0.83	0.693	6.38899013321912e-97	Vein	ERRFI1
A4GALT	2.15584916077916e-101	0.331725	0.705	0.544	6.62600239565476e-97	Vein	A4GALT
EMP3	4.29693822079839e-101	-0.417539	0.864	0.876	1.32066396216238e-96	Artery	EMP3
RPL27A	5.58989226826982e-101	0.329992	0.989	0.98	1.71805338865273e-96	Vein	RPL27A
UBXN1	1.43444431929382e-100	0.306668	0.871	0.764	4.40876461534955e-96	Vein	UBXN1
RORB	3.11099602882832e-100	-0.169581	0.048	0.192	9.56164629460383e-96	Artery	RORB
ITGA8	4.15410993089317e-100	-0.17324	0.031	0.157	1.27676568726002e-95	Artery	ITGA8
HLA-DPA1	5.98524787110649e-100	-0.346269	0.31	0.53	1.83956593318458e-95	Artery	HLA-DPA1
HAND2	1.7319379970799e-99	0.20605	0.215	0.034	5.32311143402507e-95	Vein	HAND2
COPE	2.29482778078672e-99	0.337277	0.847	0.739	7.05315318424798e-95	Vein	COPE
RPS17	2.50125397651252e-99	0.330415	0.976	0.943	7.68760409681124e-95	Vein	RPS17
SMAD6	7.44102988948812e-99	-0.121848	0.06	0.215	2.28700053653417e-94	Artery	SMAD6
PGLS	2.3289219085955e-98	0.300691	0.817	0.69	7.15794148606828e-94	Vein	PGLS
RAB13	5.23471420184386e-98	0.316844	0.83	0.696	1.60888940993671e-93	Vein	RAB13
UPK3BL1	6.06673662677027e-98	-0.179843	0.192	0.413	1.86461150223784e-93	Artery	UPK3BL1
AK1	2.4952721372538e-97	-0.376559	0.434	0.628	7.66921891384955e-93	Artery	AK1
CRIM1	1.10035251092956e-96	-0.256502	0.19	0.406	3.38193344234201e-92	Artery	CRIM1
NCL	1.20093465939484e-96	0.379268	0.928	0.859	3.69107267565005e-92	Vein	NCL
OLFML3	1.34918448861557e-96	0.466628	0.917	0.799	4.14671852575994e-92	Vein	OLFML3
POLG2	1.77316534825919e-96	-0.287752	0.181	0.389	5.44982369787462e-92	Artery	POLG2
ALDH2	1.99075837066057e-96	-0.517555	0.633	0.783	6.11859585222525e-92	Artery	ALDH2
PCSK6	2.27291452560635e-96	-0.119071	0.028	0.147	6.98580279445111e-92	Artery	PCSK6
SERPINF1	3.38460606326483e-96	0.334018	0.995	0.959	1.04025867354444e-91	Vein	SERPINF1
TMEM106C	3.63205492536489e-96	-0.195631	0.162	0.366	1.1163120813109e-91	Artery	TMEM106C
ISCU	6.32816274218957e-96	-0.350833	0.766	0.828	1.94496081881196e-91	Artery	ISCU
NDUFB3	6.69159063685128e-96	-0.276615	0.423	0.631	2.05666038223624e-91	Artery	NDUFB3
BMPER	2.01297413942599e-95	-0.171189	0.104	0.281	6.18687601752577e-91	Artery	BMPER
NDNF	2.21381520309269e-95	-0.196148	0.168	0.379	6.80416102670538e-91	Artery	NDNF
SCPEP1	5.14665795421785e-95	-0.481336	0.698	0.784	1.58182532222886e-90	Artery	SCPEP1
TLN1	5.63480914723474e-95	0.30055	0.905	0.837	1.7318585914026e-90	Vein	TLN1
CTSF	6.72375520549949e-95	-0.591799	0.763	0.802	2.06654616241027e-90	Artery	CTSF
MGAT4C	1.01617670178499e-94	-0.200477	0.06	0.208	3.12321909293616e-90	Artery	MGAT4C
CST3	1.26707808962862e-94	0.290396	0.998	0.978	3.89436450847355e-90	Vein	CST3
NDUFB1	2.24284846792877e-94	-0.355032	0.785	0.823	6.89339476617906e-90	Artery	NDUFB1
SFRP4	2.96658701340846e-94	-1.33253	0.628	0.772	9.11780518571089e-90	Artery	SFRP4
RERGL	3.4973419870533e-94	-0.125107	0.025	0.139	1.07490805972083e-89	Artery	RERGL
SEC62	3.88574300569753e-94	-0.359583	0.938	0.916	1.19428311280114e-89	Artery	SEC62
GADD45G	5.58447851270007e-94	-0.341473	0.285	0.519	1.71638947087837e-89	Artery	GADD45G
PBX1	6.17061911931848e-94	0.293696	0.82	0.698	1.89653978632254e-89	Vein	PBX1
NDUFB9	6.94556244324074e-94	0.309059	0.84	0.73	2.13471861693004e-89	Vein	NDUFB9
PKM	8.22980817921102e-94	0.382785	0.867	0.774	2.52943154388051e-89	Vein	PKM
RUNX1	1.24615934602009e-93	0.467874	0.759	0.638	3.83007074999275e-89	Vein	RUNX1
VIM	1.42493908908268e-93	-0.384077	1	1	4.37955029029563e-89	Artery	VIM
SH3PXD2A	1.44754823853526e-93	0.337218	0.637	0.464	4.44903951113812e-89	Vein	SH3PXD2A
ANKRD9	6.16732687647793e-93	0.241858	0.406	0.194	1.89552791548549e-88	Vein	ANKRD9
RACK1	7.66497691419084e-93	0.27132	0.993	0.97	2.35583065457655e-88	Vein	RACK1
MT1E	8.41779829367437e-93	0.42681	0.951	0.883	2.58721030556082e-88	Vein	MT1E
RPS21	1.16992061149221e-92	-0.332175	0.988	0.97	3.5957509994213e-88	Artery	RPS21
ADM	1.31489369539793e-92	0.890559	0.815	0.668	4.04132577280552e-88	Vein	ADM
TRAC	1.49327693099774e-92	0.390038	0.329	0.131	4.58958664742156e-88	Vein	TRAC
LMAN2	1.77523384254978e-92	0.320316	0.818	0.717	5.45618121507675e-88	Vein	LMAN2
HNRNPA1	5.83642958651014e-92	0.294985	0.914	0.832	1.79382663341389e-87	Vein	HNRNPA1
ATF3	8.726360468895e-92	0.636922	0.882	0.794	2.68204689011488e-87	Vein	ATF3
LAMB1	2.089568395926e-91	0.280171	0.762	0.586	6.42228846487857e-87	Vein	LAMB1
HSPB8	3.48288068838849e-91	-0.316234	0.317	0.532	1.0704633795762e-86	Artery	HSPB8
COL15A1	5.66794330635458e-91	0.476696	0.48	0.275	1.74204237520808e-86	Vein	COL15A1
PSMA7	8.53113907250355e-91	0.23466	0.942	0.871	2.62204559393397e-86	Vein	PSMA7
SNHG32	8.96427131966723e-91	-0.498098	0.763	0.827	2.75516879009972e-86	Artery	SNHG32
SELENOW	3.3546378296633e-90	-0.411368	0.865	0.863	1.03104793694701e-85	Artery	SELENOW
ANGPTL1	5.72611936297812e-90	0.466299	0.814	0.714	1.75992278621132e-85	Vein	ANGPTL1
GSTP1	1.20137830049936e-89	0.326467	0.955	0.917	3.69243620658477e-85	Vein	GSTP1
RPLP2	1.3356348645461e-89	0.215153	0.997	0.98	4.10507375618243e-85	Vein	RPLP2
RAC1	1.35216132859118e-89	0.277998	0.966	0.888	4.155867843425e-85	Vein	RAC1
ZFP91	1.48544517492094e-89	0.275288	0.703	0.555	4.56551574511951e-85	Vein	ZFP91
FGF12	2.80033022112147e-89	-0.116353	0.038	0.16	8.60681493461683e-85	Artery	FGF12
HAND2-AS1	3.14124116459792e-89	0.168302	0.184	0.023	9.65460471939171e-85	Vein	HAND2-AS1
EEF1D	3.28544453350866e-89	0.288194	0.966	0.932	1.00978137737389e-84	Vein	EEF1D
MRPL33	5.79602534774287e-89	-0.352145	0.633	0.766	1.78140839062877e-84	Artery	MRPL33
PRDX1	1.31599480592037e-88	0.322107	0.964	0.894	4.04471003599626e-84	Vein	PRDX1
MT-CYB	1.3742529182433e-88	0.331698	1	0.996	4.22376634422077e-84	Vein	MT-CYB
SELENOP	3.50596271502388e-88	0.421314	0.958	0.833	1.07755764046259e-83	Vein	SELENOP
AIFM2	3.64947643275298e-88	0.227724	0.419	0.212	1.12166658160663e-83	Vein	AIFM2
ZNF302	8.03033956379448e-88	-0.213246	0.241	0.465	2.46812486493223e-83	Artery	ZNF302
COL14A1	1.05279964904508e-87	-0.566102	0.786	0.884	3.23577972134006e-83	Artery	COL14A1
PLXNC1	1.60126942351751e-87	-0.207616	0.158	0.349	4.92150157318107e-83	Artery	PLXNC1
CCDC71L	1.77088734390082e-87	0.614449	0.811	0.702	5.44282225147916e-83	Vein	CCDC71L
FRZB	2.24166567957484e-87	-0.165928	0.054	0.191	6.88975946617327e-83	Artery	FRZB
ACKR3	2.59948983508156e-87	-0.79154	0.58	0.722	7.98953200812317e-83	Artery	ACKR3
EGLN1	3.01117368961677e-87	0.255025	0.607	0.437	9.25484233503713e-83	Vein	EGLN1
ARF4	3.08353214948387e-87	-0.369195	0.854	0.855	9.47723606143868e-83	Artery	ARF4
FLRT2	3.85679452767626e-87	-0.385843	0.382	0.588	1.1853857980813e-82	Artery	FLRT2
FZD7	4.63108566997953e-87	-0.177936	0.169	0.369	1.42336418066821e-82	Artery	FZD7
SEMA3D	7.31581491103796e-87	-0.274394	0.155	0.338	2.24851571290752e-82	Artery	SEMA3D
CALCRL	8.70241732059333e-87	-0.200868	0.101	0.271	2.67468796348436e-82	Artery	CALCRL
RPS4X	1.13379283625727e-86	0.271682	0.997	0.98	3.48471228223671e-82	Vein	RPS4X
CCN5	1.70801594419238e-86	0.802125	0.909	0.874	5.24958700447527e-82	Vein	CCN5
UBA52	1.8394768823628e-86	0.218903	0.991	0.97	5.65363219794207e-82	Vein	UBA52
ARID5B	1.85224084975046e-86	0.366042	0.979	0.93	5.69286225170804e-82	Vein	ARID5B
ZNHIT1	6.96160746653087e-86	0.296261	0.852	0.745	2.13965005483826e-81	Vein	ZNHIT1
BTG2	9.23038761059588e-86	-0.80272	0.768	0.857	2.83695963211664e-81	Artery	BTG2
ETV1	1.09133982583104e-85	-0.118816	0.07	0.219	3.3542329546917e-81	Artery	ETV1
CLEC2B	1.17290074473268e-85	0.521042	0.712	0.582	3.60491043893589e-81	Vein	CLEC2B
ITGB8	1.22348555998539e-85	-0.134893	0.053	0.187	3.76038286861509e-81	Artery	ITGB8
LDLR	1.36740860606739e-85	0.305628	0.536	0.34	4.20273035074811e-81	Vein	LDLR
EFEMP1	1.45693936367807e-85	0.324609	0.972	0.918	4.47790313426455e-81	Vein	EFEMP1
FBLN5	2.25507081724818e-85	0.395888	0.929	0.819	6.93096015681229e-81	Vein	FBLN5
EPAS1	2.85193934038214e-85	0.243575	0.723	0.558	8.7654355626645e-81	Vein	EPAS1
GMDS	5.04951547134914e-85	-0.206066	0.167	0.356	1.55196858011916e-80	Artery	GMDS
SGCG	7.90059406124096e-85	-0.11181	0.034	0.15	2.42824758472241e-80	Artery	SGCG
SNHG16	8.71344493586839e-85	0.302776	0.804	0.689	2.67807730103915e-80	Vein	SNHG16
CYGB	1.62589308261853e-84	0.423455	0.691	0.508	4.99718238942807e-80	Vein	CYGB
BRK1	1.72669110014559e-84	0.260207	0.868	0.78	5.30698509629747e-80	Vein	BRK1
EGR1	3.5799897509042e-84	-0.685851	0.893	0.911	1.10030984994041e-79	Artery	EGR1
DUSP1	3.7955067003388e-84	-0.437415	0.964	0.96	1.16654898434913e-79	Artery	DUSP1
JUNB	1.13372345348249e-83	-0.465097	0.983	0.975	3.48449903427842e-79	Artery	JUNB
SNX7	1.28512369407663e-83	-0.201798	0.304	0.523	3.94982767374452e-79	Artery	SNX7
PTN	1.6336915780355e-83	-0.501771	0.126	0.296	5.02115106509211e-79	Artery	PTN
ABI3BP	2.7864350736909e-83	-0.673305	0.939	0.937	8.56410819898897e-79	Artery	ABI3BP
HOXC8	3.84265209438346e-83	0.15523	0.201	0.038	1.18103912120876e-78	Vein	HOXC8
HIST1H2AC	3.98516318800282e-83	-0.223703	0.233	0.436	1.22483990583267e-78	Artery	HIST1H2AC
MRPS12	4.43956715797789e-83	0.252849	0.591	0.445	1.36450096600451e-78	Vein	MRPS12
WNT2	4.55394191630755e-83	-0.144886	0.049	0.175	1.39965404797713e-78	Artery	WNT2
EYA2	5.40328413568092e-83	-0.105488	0.073	0.221	1.66069937910153e-78	Artery	EYA2
ID1	6.63020495895227e-83	-0.430608	0.327	0.536	2.03779349413398e-78	Artery	ID1
COL4A2	6.98597608394346e-83	0.429924	0.855	0.775	2.14713974940002e-78	Vein	COL4A2
PCOLCE2	7.09558575525898e-83	-0.703958	0.616	0.755	2.18082828187885e-78	Artery	PCOLCE2
NFKBIA	1.05184350443284e-82	0.523845	0.96	0.909	3.23284101087432e-78	Vein	NFKBIA
TSHZ2	1.29360635194782e-82	-0.517675	0.745	0.823	3.97589912271162e-78	Artery	TSHZ2
CCDC102B	1.49121661125828e-82	-0.499301	0.457	0.636	4.58325425470232e-78	Artery	CCDC102B
NDUFB8	2.6505383450989e-82	0.278249	0.865	0.778	8.14642960366147e-78	Vein	NDUFB8
ATP6V0B	2.9733296393223e-82	0.297806	0.778	0.666	9.13852864645708e-78	Vein	ATP6V0B
CHI3L1	3.03684131892789e-82	1.1925	0.25	0.075	9.33373179372487e-78	Vein	CHI3L1
EPS8	3.09104236940305e-82	0.306255	0.88	0.8	9.50031872236027e-78	Vein	EPS8
PCBP2	4.30667131859754e-82	-0.309827	0.865	0.891	1.32365542977095e-77	Artery	PCBP2
AKAP13	4.59927583045875e-82	0.212116	0.929	0.86	1.4135874264915e-77	Vein	AKAP13
PNRC2	5.20830882798205e-82	0.308569	0.893	0.803	1.60077371828028e-77	Vein	PNRC2
LAMA4	6.64901405010526e-82	0.419606	0.728	0.608	2.04357446829985e-77	Vein	LAMA4
ATP5MD	7.07608533366396e-82	-0.330757	0.88	0.868	2.17483482730162e-77	Artery	ATP5MD
RPS20	7.4226851760549e-82	0.254987	0.991	0.97	2.28136228886047e-77	Vein	RPS20
PRELP	1.1105779203078e-81	-0.530776	0.842	0.894	3.41336123806602e-77	Artery	PRELP
PIK3R1	1.2368444045845e-81	-0.414001	0.868	0.902	3.80144127749047e-77	Artery	PIK3R1
CHMP2A	1.52303733372999e-81	0.265302	0.838	0.726	4.68105524521912e-77	Vein	CHMP2A
ERGIC3	1.76928831284171e-81	0.276385	0.764	0.654	5.437907629519e-77	Vein	ERGIC3
ATP6V1F	2.93853246034267e-81	0.292505	0.864	0.753	9.0315795168632e-77	Vein	ATP6V1F
RRBP1	3.18088249577355e-81	0.392414	0.933	0.882	9.77644235076001e-77	Vein	RRBP1
SYNE1	4.85281736750145e-81	-0.4743	0.636	0.782	1.49151341790157e-76	Artery	SYNE1
HLA-C	5.18520571027598e-81	0.331768	0.962	0.894	1.59367297505332e-76	Vein	HLA-C
LINC01133	5.21615256478526e-81	-0.215792	0.158	0.341	1.60318449078675e-76	Artery	LINC01133
COX7A1	6.99330445065849e-81	-0.367424	0.728	0.811	2.14939212290989e-76	Artery	COX7A1
CD99	1.13477266081701e-80	-0.360261	0.972	0.937	3.48772377302107e-76	Artery	CD99
ADH5	1.16308777148318e-80	0.295097	0.923	0.835	3.57475026565355e-76	Vein	ADH5
SLC3A2	2.0980761756817e-80	0.253184	0.854	0.743	6.4484371259577e-76	Vein	SLC3A2
RBM17	6.93686280254873e-80	0.271457	0.681	0.551	2.13204478236335e-75	Vein	RBM17
PRELID1	1.05688693509527e-79	0.293478	0.805	0.703	3.24834199501531e-75	Vein	PRELID1
SRP14	1.13618956463651e-79	0.231621	0.984	0.945	3.49207862691032e-75	Vein	SRP14
IGDCC4	1.46852714172963e-79	-0.104954	0.075	0.22	4.51351817010601e-75	Artery	IGDCC4
ZNF331	2.58948977881945e-79	0.41141	0.667	0.502	7.95879683520157e-75	Vein	ZNF331
SNHG18	2.71644552618615e-79	-0.277279	0.35	0.536	8.34899532473313e-75	Artery	SNHG18
FYN	2.82130880417082e-79	0.259677	0.842	0.747	8.67129260961902e-75	Vein	FYN
TMEM99	3.28537843585403e-79	-0.123692	0.156	0.345	1.00976106225974e-74	Artery	TMEM99
RPL10	7.1763086991454e-79	0.236453	0.999	0.999	2.20563847868234e-74	Vein	RPL10
NHP2	1.46336878238476e-78	0.263082	0.739	0.609	4.49766395265955e-74	Vein	NHP2
NFKB1	1.46797259690628e-78	0.314461	0.671	0.539	4.51181377659145e-74	Vein	NFKB1
NAA38	1.99002339808672e-78	-0.333981	0.741	0.791	6.11633691401954e-74	Artery	NAA38
FHOD3	2.47734389642159e-78	-0.101706	0.038	0.151	7.61411646565174e-74	Artery	FHOD3
PSMB5	2.49921007378022e-78	0.269792	0.849	0.759	7.68132216176349e-74	Vein	PSMB5
SUSD5	3.60209384322975e-78	-0.126562	0.036	0.147	1.10710354271666e-73	Artery	SUSD5
SGCD	3.96896707743998e-78	-0.229745	0.288	0.493	1.21986203125118e-73	Artery	SGCD
RAB7A	4.6860824584997e-78	0.271329	0.857	0.763	1.44026744361988e-73	Vein	RAB7A
NDUFS7	5.50977230330217e-78	0.260232	0.715	0.6	1.69342851741992e-73	Vein	NDUFS7
TIMM13	5.86646291488774e-78	0.282578	0.798	0.693	1.80305737689075e-73	Vein	TIMM13
HCFC1R1	1.09845953608972e-77	-0.510963	0.592	0.676	3.37611538417174e-73	Artery	HCFC1R1
MIR99AHG	1.20699400572116e-77	-0.438997	0.65	0.787	3.709696076584e-73	Artery	MIR99AHG
SERTAD4-AS1	2.21108863933034e-77	-0.101693	0.043	0.162	6.79578093298178e-73	Artery	SERTAD4-AS1
C11orf96	2.70387973580312e-77	0.420893	0.966	0.971	8.31037436799088e-73	Vein	C11orf96
FUNDC2	2.87254295646435e-77	0.303747	0.839	0.745	8.82876077669319e-73	Vein	FUNDC2
CYC1	4.12164214383012e-77	0.254883	0.696	0.571	1.26678671290619e-72	Vein	CYC1
TMEM237	4.27161625614716e-77	-0.241543	0.305	0.511	1.31288125632683e-72	Artery	TMEM237
PPDPF	4.49725921296442e-77	-0.368624	0.93	0.883	1.38223261910461e-72	Artery	PPDPF
TINAGL1	4.64600246593115e-77	-0.128137	0.048	0.171	1.42794885790394e-72	Artery	TINAGL1
CRELD1	5.68066635557745e-77	0.195788	0.332	0.155	1.74595280438673e-72	Vein	CRELD1
PLPP3	8.16647693664736e-77	0.492562	0.934	0.865	2.50996668647857e-72	Vein	PLPP3
SAMD11	9.39092136283528e-77	-0.151983	0.109	0.27	2.88629968086742e-72	Artery	SAMD11
NDUFA11	1.16344579624587e-76	0.274485	0.91	0.832	3.57585065476167e-72	Vein	NDUFA11
LURAP1L	1.39824494471468e-76	-0.151336	0.168	0.351	4.29750583758058e-72	Artery	LURAP1L
RBP1	2.06778434594516e-76	0.282766	0.39	0.207	6.35533518726246e-72	Vein	RBP1
NDUFC1	2.26803421756661e-76	-0.309322	0.686	0.781	6.97080316769098e-72	Artery	NDUFC1
ADAM12	2.70459648549685e-76	-0.152963	0.046	0.163	8.31257729817458e-72	Artery	ADAM12
RPS18	3.91456405483797e-76	0.225085	0.998	0.99	1.20314126225445e-71	Vein	RPS18
YWHAG	5.02080200537082e-76	0.314882	0.721	0.603	1.54314349635072e-71	Vein	YWHAG
CEBPB	7.23029020147787e-76	0.292479	0.972	0.91	2.22222969342422e-71	Vein	CEBPB
XAF1	1.52803848885253e-75	-0.232647	0.192	0.385	4.69642629548824e-71	Artery	XAF1
ANKRD11	1.55990650885003e-75	0.238422	0.789	0.676	4.79437265495058e-71	Vein	ANKRD11
DCXR	1.79858476418004e-75	0.42115	0.622	0.49	5.52795027270735e-71	Vein	DCXR
CFL2	2.15002342741238e-75	-0.317277	0.483	0.673	6.60809700415196e-71	Artery	CFL2
MPZL1	2.25120081172915e-75	0.264469	0.846	0.763	6.91906569484954e-71	Vein	MPZL1
TTPAL	3.1483067266752e-75	0.197904	0.4	0.209	9.67632072443623e-71	Vein	TTPAL
QKI	3.35006856055765e-75	0.245634	0.897	0.814	1.02964357208739e-70	Vein	QKI
VEGFB	3.4374094672094e-75	-0.47087	0.764	0.823	1.05648779974681e-70	Artery	VEGFB
SAMD9L	4.04729694687484e-75	-0.158137	0.142	0.317	1.24393671662198e-70	Artery	SAMD9L
SIPA1L1	4.2133088475308e-75	-0.211273	0.156	0.334	1.29496047428859e-70	Artery	SIPA1L1
EPHA3	4.36034025122642e-75	-0.356857	0.347	0.542	1.34015057621444e-70	Artery	EPHA3
DYNLL1	4.7414093895405e-75	-0.326806	0.952	0.91	1.45727217587527e-70	Artery	DYNLL1
AC005165.1	5.1904683435165e-75	-0.178528	0.024	0.12	1.5952904453798e-70	Artery	AC005165.1
TCEAL4	5.36388990471791e-75	0.492807	0.896	0.826	1.64859156221505e-70	Vein	TCEAL4
TBL1XR1	1.06770895512374e-74	-0.331803	0.568	0.72	3.28160347357283e-70	Artery	TBL1XR1
CSF3	1.16536099574375e-74	0.356264	0.203	0.045	3.58173702041842e-70	Vein	CSF3
AC062004.1	1.43890934549407e-74	-0.104089	0.034	0.14	4.42248787337602e-70	Artery	AC062004.1
TTC3	2.20348855003863e-74	-0.413143	0.721	0.807	6.77242205854372e-70	Artery	TTC3
MYOC	2.37335909352415e-74	-0.799165	0.41	0.591	7.29451917394649e-70	Artery	MYOC
ZFAS1	4.20522561847922e-74	-0.475571	0.956	0.923	1.29247609383959e-69	Artery	ZFAS1
TAX1BP1	5.07285837112328e-74	0.262507	0.847	0.747	1.55914302036474e-69	Vein	TAX1BP1
ARPC5	5.163772538024e-74	0.263483	0.877	0.784	1.58708548956168e-69	Vein	ARPC5
FAM20C	5.87182931187955e-74	0.316138	0.562	0.418	1.80470673900618e-69	Vein	FAM20C
PRDX6	6.37266762296256e-74	0.299026	0.945	0.868	1.95863939391754e-69	Vein	PRDX6
SAMD9	1.2171297099364e-73	-0.151763	0.121	0.285	3.74084816348953e-69	Artery	SAMD9
APCDD1	1.26482004528614e-73	0.276807	0.384	0.2	3.88742440918696e-69	Vein	APCDD1
ATP1B1	1.93429224680542e-73	-0.138517	0.069	0.202	5.94504722055644e-69	Artery	ATP1B1
GALNT5	2.33615382461355e-73	-0.102719	0.035	0.14	7.18016877994974e-69	Artery	GALNT5
CSNK1D	2.54543899936266e-73	0.212096	0.584	0.428	7.82340676454113e-69	Vein	CSNK1D
HMOX1	3.34210156055636e-73	0.904091	0.552	0.413	1.027194914637e-68	Vein	HMOX1
SERPINA5	4.17080481889162e-73	0.306165	0.45	0.253	1.28189686108634e-68	Vein	SERPINA5
RABAC1	4.43633965221582e-73	0.298565	0.961	0.894	1.36350899210853e-68	Vein	RABAC1
TLNRD1	5.2382040598019e-73	0.235667	0.612	0.458	1.60996201778012e-68	Vein	TLNRD1
NDUFA13	6.22960894021945e-73	0.25964	0.951	0.889	1.91467030777645e-68	Vein	NDUFA13
EIF4A2	8.3495107670472e-73	-0.305836	0.926	0.912	2.56622213425196e-68	Artery	EIF4A2
VGLL4	9.52239692254956e-73	0.28756	0.762	0.672	2.92670869414561e-68	Vein	VGLL4
TSC22D3	9.92735119051806e-73	-0.178754	0.788	0.877	3.05117138840573e-68	Artery	TSC22D3
TLR4	1.43829589149629e-72	0.325614	0.323	0.149	4.42060242251384e-68	Vein	TLR4
NRN1	1.60957137069993e-72	0.156421	0.223	0.062	4.94701760784624e-68	Vein	NRN1
PCDH9	2.23529821430651e-72	-0.285864	0.27	0.469	6.87018906167104e-68	Artery	PCDH9
CCN4	2.37361870204757e-72	-0.25293	0.152	0.323	7.2953170807432e-68	Artery	CCN4
COL1A2	2.90058517552588e-72	-1.57589	0.987	0.954	8.9149485369788e-68	Artery	COL1A2
RB1CC1	2.9859008871541e-72	0.287259	0.774	0.66	9.17716637666812e-68	Vein	RB1CC1
RBM43	3.41289521205265e-72	-0.235439	0.29	0.488	1.04895334342438e-67	Artery	RBM43
TNFSF9	4.00531806575938e-72	-0.158268	0.15	0.321	1.23103450751114e-67	Artery	TNFSF9
SNX9	5.47264379841985e-72	0.267997	0.883	0.811	1.68201707144434e-67	Vein	SNX9
ARMCX2	6.43712265257123e-72	-0.166944	0.251	0.45	1.97844964726777e-67	Artery	ARMCX2
NCALD	6.81711577461448e-72	0.244852	0.429	0.249	2.09524053332776e-67	Vein	NCALD
FKBP1A	1.25588458042579e-71	0.291275	0.862	0.761	3.85996125793866e-67	Vein	FKBP1A
MVP	3.18407644169733e-71	0.258207	0.734	0.615	9.78625894355674e-67	Vein	MVP
SH3BP5	3.72495627640606e-71	0.248289	0.902	0.832	1.1448653115534e-66	Vein	SH3BP5
ZC3H12A	3.83745598712503e-71	0.27677	0.52	0.357	1.17944209764288e-66	Vein	ZC3H12A
CNTN4	7.25194850089345e-71	-0.295056	0.247	0.428	2.2288863717496e-66	Artery	CNTN4
PLK2	7.49349276071845e-71	0.544593	0.627	0.489	2.30312500000682e-66	Vein	PLK2
LSMEM1	9.21293859952426e-71	-0.206163	0.183	0.363	2.83159667856378e-66	Artery	LSMEM1
NME1	1.85935581732962e-70	0.305915	0.577	0.432	5.71473010456259e-66	Vein	NME1
MTLN	2.13832200722354e-70	-0.255426	0.445	0.625	6.57213268920155e-66	Artery	MTLN
FSCN1	3.33056507539659e-70	-0.221141	0.247	0.427	1.02364917592314e-65	Artery	FSCN1
YPEL2	5.82458772853541e-70	0.294367	0.792	0.665	1.79018703836536e-65	Vein	YPEL2
CCT3	5.98434984680825e-70	0.257212	0.803	0.712	1.83928992541651e-65	Vein	CCT3
FOS	7.33507667492936e-70	-0.397498	0.98	0.98	2.25443581603954e-65	Artery	FOS
TCEAL3	7.42495976530936e-70	0.272675	0.62	0.484	2.28206138386783e-65	Vein	TCEAL3
PAPSS2	7.81980398625864e-70	0.290353	0.602	0.453	2.40341675517659e-65	Vein	PAPSS2
DDX24	8.15064214098898e-70	0.249605	0.935	0.864	2.50509986203296e-65	Vein	DDX24
SNHG8	9.22689936846463e-70	-0.362268	0.856	0.849	2.8358875208976e-65	Artery	SNHG8
CYP7B1	1.04629607544591e-69	0.315971	0.508	0.354	3.215790987883e-65	Vein	CYP7B1
ANGPTL4	1.07908689162674e-69	0.538575	0.567	0.403	3.31657356141479e-65	Vein	ANGPTL4
PXDN	1.25960001167824e-69	0.266163	0.671	0.546	3.87138063589306e-65	Vein	PXDN
FOXN3	1.31231907770833e-69	0.24772	0.809	0.712	4.03341268533655e-65	Vein	FOXN3
RPS6	1.44742149788019e-69	0.191208	0.997	0.987	4.44864997373476e-65	Vein	RPS6
PA2G4	2.26346980291669e-69	0.244923	0.851	0.762	6.95677443926443e-65	Vein	PA2G4
SERPINF2	2.93662783150546e-69	0.227512	0.358	0.179	9.02572564013204e-65	Vein	SERPINF2
SNU13	4.59715325857651e-69	0.236315	0.875	0.778	1.41293505402349e-64	Vein	SNU13
MLXIP	5.28068650775813e-69	0.223744	0.55	0.392	1.62301899815946e-64	Vein	MLXIP
RARRES2	5.41165926637017e-69	0.460045	0.886	0.792	1.66327347551887e-64	Vein	RARRES2
ATP5F1B	5.47730022640469e-69	0.257427	0.848	0.757	1.68344822458548e-64	Vein	ATP5F1B
CHCHD2	6.16313594597272e-69	0.239873	0.961	0.905	1.89423983299472e-64	Vein	CHCHD2
HNRNPA0	7.26630552531515e-69	0.257683	0.901	0.82	2.23329900320561e-64	Vein	HNRNPA0
GREB1	7.29753774468279e-69	0.188132	0.28	0.108	2.24289822582826e-64	Vein	GREB1
ZDHHC9	1.38951789302217e-68	0.230775	0.529	0.376	4.27068324420365e-64	Vein	ZDHHC9
HSD17B10	1.65670817126339e-68	0.2278	0.648	0.53	5.09189256437803e-64	Vein	HSD17B10
LDHA	1.72912880757578e-68	0.289869	0.97	0.945	5.31447739008416e-64	Vein	LDHA
NET1	2.44611334593071e-68	-0.229425	0.228	0.413	7.51812936871803e-64	Artery	NET1
NUTM2A-AS1	2.70480078391044e-68	0.167829	0.514	0.326	8.31320520934875e-64	Vein	NUTM2A-AS1
CCBE1	2.85178065386702e-68	0.172793	0.219	0.064	8.76494783966029e-64	Vein	CCBE1
NDUFAF3	3.47359284539007e-68	0.237214	0.786	0.674	1.06760876103064e-63	Vein	NDUFAF3
ARHGAP29	3.72961933815744e-68	-0.226453	0.303	0.507	1.14629850358269e-63	Artery	ARHGAP29
ANKRD36	4.97107904204788e-68	-0.166128	0.113	0.267	1.52786114357342e-63	Artery	ANKRD36
CRELD2	1.03315395826396e-67	0.317878	0.59	0.472	3.17539869072428e-63	Vein	CRELD2
HEY2	1.11930656158464e-67	-0.140918	0.086	0.224	3.44018871703038e-63	Artery	HEY2
PHB	1.37503162410718e-67	0.260863	0.754	0.657	4.22615969669341e-63	Vein	PHB
MYH10	1.40391557237724e-67	-0.330116	0.409	0.597	4.31493451170145e-63	Artery	MYH10
TIPARP	1.52472992058153e-67	0.206854	0.801	0.692	4.68625741090733e-63	Vein	TIPARP
LPIN3	1.95329459953271e-67	-0.103575	0.081	0.217	6.0034509516638e-63	Artery	LPIN3
TMEM165	2.04676501261308e-67	0.236654	0.843	0.741	6.29073226626629e-63	Vein	TMEM165
WDR43	2.07190299495082e-67	0.230864	0.583	0.43	6.36799385498135e-63	Vein	WDR43
BTG1	4.21240076029153e-67	0.419023	0.92	0.835	1.2946813736756e-62	Vein	BTG1
PGK1	5.3381192948453e-67	0.279293	0.783	0.696	1.6406709652707e-62	Vein	PGK1
ZMAT3	6.01338292776177e-67	-0.269737	0.253	0.424	1.84821324284758e-62	Artery	ZMAT3
NAPRT	6.69969404678201e-67	0.194717	0.446	0.274	2.05915096527845e-62	Vein	NAPRT
MARCKS	7.12994140576811e-67	-0.644992	0.801	0.771	2.19138749106283e-62	Artery	MARCKS
FOSL1	7.84930550375361e-67	0.215402	0.339	0.168	2.41248404657867e-62	Vein	FOSL1
TRAPPC5	9.44629982108327e-67	0.256258	0.853	0.751	2.90332025000994e-62	Vein	TRAPPC5
RPL37A	1.53594193417589e-66	-0.285579	0.996	0.994	4.72071753468961e-62	Artery	RPL37A
SDF2L1	2.55401103027341e-66	0.270565	0.537	0.394	7.84975290154533e-62	Vein	SDF2L1
SOX4	2.73118500919135e-66	0.34813	0.824	0.681	8.39429712574962e-62	Vein	SOX4
MAGED2	2.74897210621764e-66	-0.379859	0.647	0.729	8.44896576845991e-62	Artery	MAGED2
GRN	2.80649643305967e-66	0.298371	0.86	0.734	8.62576678700889e-62	Vein	GRN
HNRNPA3	3.30514879586615e-66	0.203534	0.878	0.791	1.01583748240946e-61	Vein	HNRNPA3
SYNM	4.1688820868489e-66	-0.183619	0.11	0.258	1.28130590939301e-61	Artery	SYNM
GTPBP6	6.88230227733711e-66	0.217393	0.572	0.438	2.11527560493956e-61	Vein	GTPBP6
SMAD3	7.2902833675918e-66	0.115766	0.755	0.627	2.24066859302934e-61	Vein	SMAD3
B4GALT1	1.17200355551567e-65	0.259229	0.8	0.694	3.60215292787741e-61	Vein	B4GALT1
TMEM208	1.71433052053479e-65	0.252168	0.728	0.614	5.26899485486368e-61	Vein	TMEM208
PEG10	1.87113309766019e-65	-0.152257	0.063	0.184	5.75092757565859e-61	Artery	PEG10
FBXL5	1.97883022576435e-65	-0.258293	0.355	0.555	6.08193469888673e-61	Artery	FBXL5
LOX	2.05735911643427e-65	-0.471333	0.727	0.796	6.32329324436073e-61	Artery	LOX
SFRP1	3.14830628991573e-65	0.578253	0.85	0.768	9.67631938205598e-61	Vein	SFRP1
ADD3	4.38514195712458e-65	-0.399511	0.839	0.864	1.34777338052224e-60	Artery	ADD3
ANGPTL5	4.40477468991681e-65	-0.367589	0.292	0.466	1.35380750094593e-60	Artery	ANGPTL5
MTSS1	6.0018502404419e-65	0.299908	0.523	0.351	1.84466867139982e-60	Vein	MTSS1
APLP2	6.98648446287813e-65	0.251307	0.94	0.877	2.14729599966559e-60	Vein	APLP2
PLAU	7.68390829054055e-65	0.523103	0.395	0.243	2.36164921309764e-60	Vein	PLAU
CD81	1.10099862050739e-64	0.274257	0.988	0.934	3.38391926012946e-60	Vein	CD81
AURKAIP1	1.50508255578942e-64	0.239376	0.799	0.708	4.6258712352188e-60	Vein	AURKAIP1
SEMA4A	3.00417366637654e-64	-0.221784	0.195	0.37	9.23332776360831e-60	Artery	SEMA4A
SNRPD2	4.02428261265267e-64	0.229072	0.923	0.842	1.2368632609988e-59	Vein	SNRPD2
UPP1	4.16905565651562e-64	0.193022	0.367	0.192	1.28135925603008e-59	Vein	UPP1
ACKR4	4.59500684938409e-64	-0.140272	0.115	0.264	1.4122753551582e-59	Artery	ACKR4
FAXDC2	4.73564172580063e-64	0.296403	0.605	0.458	1.45549948442482e-59	Vein	FAXDC2
XIST	5.1668125698713e-64	0.287873	0.795	0.594	1.58801984334994e-59	Vein	XIST
NECTIN2	8.3276363934481e-64	0.223511	0.572	0.433	2.55949904552627e-59	Vein	NECTIN2
RASSF3	1.46121514540136e-63	-0.189127	0.074	0.197	4.49104474939108e-59	Artery	RASSF3
DUSP14	1.71332081202931e-63	0.28871	0.435	0.294	5.26589151577209e-59	Vein	DUSP14
CRABP2	1.80113713744433e-63	-0.368828	0.199	0.354	5.53579499193516e-59	Artery	CRABP2
RPS10	2.21631797645419e-63	0.243843	0.947	0.895	6.81185330063194e-59	Vein	RPS10
KDM7A-DT	3.56107780402891e-63	0.248639	0.523	0.362	1.09449726306828e-58	Vein	KDM7A-DT
RGPD5	3.77851504269168e-63	-0.201624	0.129	0.279	1.16132659837129e-58	Artery	RGPD5
SULT1A1	3.96191593137487e-63	0.274663	0.501	0.362	1.21769486150807e-58	Vein	SULT1A1
LPAR6	5.24085317723155e-63	-0.135105	0.14	0.298	1.61077622402212e-58	Artery	LPAR6
LINC02511	5.32858763034473e-63	-0.131528	0.094	0.23	1.63774140818645e-58	Artery	LINC02511
BTN3A1	7.46088401195952e-63	-0.109413	0.1	0.24	2.29310270107576e-58	Artery	BTN3A1
MBD2	8.90991367620198e-63	0.197729	0.717	0.594	2.73846196838068e-58	Vein	MBD2
ADRM1	9.43827183551545e-63	0.205515	0.64	0.523	2.90085284864567e-58	Vein	ADRM1
DPP4	1.12697220146879e-62	0.36977	0.221	0.079	3.46374906121431e-58	Vein	DPP4
ZNF83	2.57460574282729e-62	-0.282671	0.326	0.521	7.91305075057967e-58	Artery	ZNF83
[truncated: 1,982 more rows]

## Sheet: Data Set S5 (ActFibr VeinvsArt)
	p_val	avg_log2FC	pct.1	pct.2	p_val_adj	direction	gene
[truncated: 4,102 more rows]

[truncated: 3 more sheets: Data Set S6 (ModSMC VeinvsArt), Data Set S7 (TFs in SMCs), Data Set S8 (ECM Proteomics)]
